# Supplementary material for: Digital Gene Expression Analysis of Populus simonii × P. nigra Pollen Germination and Tube Growth
Source: Front Plant Sci. 2016 Jun 15;7:825. doi: 10.3389/fpls.2016.00825 (PMC4908133; doi:10.3389/fpls.2016.00825)
Supplement: Supplementary Table S6 — DEGs during PG and PTG. [file Table6.xls]

## Sheet: MPvsHP.DiffGeneExpFilter.xls
Gene	RawIntensity-MP	RawIntensity-HP	TPM-MP	TPM-HP	log2 Ratio(HP/MP)	Up-Down-Regulation(HP/MP)	P-Value	FDR	Description	GO Component	GO Function	GO Process
555257	0	69	0.01	23.08	11.1724	Up	8.88e-16	3.42e-14	jgi|Poptr1_1|555257|eugene3.00031890|CDS chrom=LG_III strand=- start=18915921 end=18917620 cdsStart=18915921 cdsEnd=18917591 sfCount=4 sfStarts=18915921,18916745,18917096,18917379, sfEnds=18916378,18916913,18917287,18917620,	-	GO:0004601//peroxidase activity	GO:0006979//response to oxidative stress
822482	0	67	0.01	22.41	11.1299	Up	8.88e-16	3.41e-14	jgi|Poptr1_1|822482|estExt_fgenesh4_pg.C_LG_X1852|CDS chrom=LG_X strand=- start=18050456 end=18053182 cdsStart=18050456 cdsEnd=18052999 sfCount=2 sfStarts=18050456,18052786, sfEnds=18052188,18053182,	-	GO:0005524//ATP binding	-
592912	0	59	0.01	19.73	10.9462	Up	8.88e-16	3.38e-14	jgi|Poptr1_1|592912|eugene3.00440247|CDS chrom=scaffold_44 strand=+ start=2396281 end=2399273 cdsStart=2396415 cdsEnd=2399110 sfCount=4 sfStarts=2396281,2396642,2397151,2397560, sfEnds=2396552,2396783,2397431,2399273,	-	GO:0051082//unfolded protein binding;GO:0005524//ATP binding;GO:0003763	GO:0006457//protein folding
669292	0	51	0.01	17.06	10.7364	Up	8.88e-16	3.39e-14	jgi|Poptr1_1|669292|grail3.0020003201|CDS chrom=LG_XVIII strand=+ start=7797175 end=7797997 cdsStart=7797343 cdsEnd=7797780 sfCount=2 sfStarts=7797175,7797342, sfEnds=7797241,7797997,	-	GO:0003677//DNA binding	-
823806	0	46	0.01	15.38	10.5868	Up	8.88e-16	3.4e-14	jgi|Poptr1_1|823806|estExt_fgenesh4_pg.C_LG_XIII0447|CDS chrom=LG_XIII strand=- start=10336249 end=10337561 cdsStart=10336893 cdsEnd=10337471 sfCount=2 sfStarts=10336249,10336712, sfEnds=10336267,10337561,	-	-	-
653054	0	43	0.01	14.38	10.4898	Up	8.88e-16	3.37e-14	jgi|Poptr1_1|653054|grail3.0023024001|CDS chrom=LG_VI strand=+ start=6360998 end=6361691 cdsStart=6361083 cdsEnd=6361505 sfCount=1 sfStarts=6360998, sfEnds=6361691,	-	-	-
834740	0	39	0.01	13.04	10.3487	Up	1.11e-15	4.18e-14	jgi|Poptr1_1|834740|estExt_fgenesh4_pm.C_LG_XIV0110|CDS chrom=LG_XIV strand=- start=2259729 end=2263693 cdsStart=2259986 cdsEnd=2263479 sfCount=5 sfStarts=2259729,2260457,2260971,2261383,2263311, sfEnds=2260180,2260538,2261058,2261430,2263693,	-	-	-
806761	0	38	0.01	12.71	10.3117	Up	1.33e-15	4.97e-14	jgi|Poptr1_1|806761|fgenesh4_pm.C_LG_XIII000061|CDS chrom=LG_XIII strand=+ start=991480 end=991950 cdsStart=991480 cdsEnd=991950 sfCount=1 sfStarts=991480, sfEnds=991950,	-	-	-
550478	0	37	0.01	12.37	10.2726	Up	2.22e-15	8.07e-14	jgi|Poptr1_1|550478|eugene3.00012919|CDS chrom=LG_I strand=- start=33813771 end=33816791 cdsStart=33813939 cdsEnd=33816791 sfCount=4 sfStarts=33813771,33814926,33816163,33816567, sfEnds=33814193,33815247,33816410,33816791,	-	GO:0005506//iron ion binding;GO:0016216//isopenicillin-N synthase activity;GO:0000907//sulfonate dioxygenase activity;GO:0016706//oxidoreductase activity, acting on paired donors, with incorporation or reduction of molecular oxygen, 2-oxoglutarate as one donor, and incorporation of one atom each of oxygen into both donors;GO:0018602//2,4-dichlorophenoxyacetate alpha-ketoglutarate dioxygenase acti…	GO:0017000//antibiotic biosynthetic process
734743	0	37	0.01	12.37	10.2726	Up	2.22e-15	8.04e-14	jgi|Poptr1_1|734743|estExt_Genewise1_v1.C_LG_XVI1213|CDS chrom=LG_XVI strand=+ start=2024119 end=2027838 cdsStart=2024445 cdsEnd=2027479 sfCount=7 sfStarts=2024119,2026086,2026457,2026672,2026947,2027413,2027667, sfEnds=2025546,2026362,2026542,2026829,2027023,2027640,2027838,	-	-	-
738820	0	28	0.01	9.36	9.87036	Up	5.25e-12	1.26e-10	jgi|Poptr1_1|738820|estExt_Genewise1_v1.C_LG_XIX2021|CDS chrom=LG_XIX strand=- start=9208574 end=9209317 cdsStart=9208763 cdsEnd=9209221 sfCount=1 sfStarts=9208574, sfEnds=9209317,	-	-	-
256329	0	26	0.01	8.7	9.76487	Up	3.3e-11	7.36e-10	jgi|Poptr1_1|256329|gw1.XVI.2268.1|CDS chrom=LG_XVI strand=+ start=5134769 end=5135389 cdsStart=5134769 cdsEnd=5135389 sfCount=1 sfStarts=5134769, sfEnds=5135389,	-	-	-
1081698	0	26	0.01	8.7	9.76487	Up	3.3e-11	7.35e-10	jgi|Poptr1_1|1081698|estExt_Genewise1Plus.C_LG_VI2884|CDS chrom=LG_VI strand=+ start=18174576 end=18175797 cdsStart=18174617 cdsEnd=18175797 sfCount=3 sfStarts=18174576,18175094,18175305, sfEnds=18174883,18175212,18175797,	-	-	-
757146	0	24	0.01	8.03	9.64926	Up	2.08e-10	4.27e-09	jgi|Poptr1_1|757146|fgenesh4_pg.C_LG_III000688|CDS chrom=LG_III strand=- start=8760413 end=8760931 cdsStart=8760413 cdsEnd=8760931 sfCount=1 sfStarts=8760413, sfEnds=8760931,	GO:0000151//ubiquitin ligase complex	GO:0004842//ubiquitin-protein ligase activity;GO:0008270//zinc ion binding	GO:0016567//protein ubiquitination
177033	0	22	0.01	7.36	9.52356	Up	1.31e-09	2.43e-08	jgi|Poptr1_1|177033|gw1.I.5633.1|CDS chrom=LG_I strand=- start=33930941 end=33933692 cdsStart=33930941 cdsEnd=33933692 sfCount=5 sfStarts=33933530,33932795,33932065,33931607,33930941, sfEnds=33933692,33933087,33932376,33931975,33931414,	-	-	-
929728	0	22	0.01	7.36	9.52356	Up	1.31e-09	2.43e-08	jgi|Poptr1_1|929728|e_gw1.147.59.1|CDS chrom=scaffold_147 strand=+ start=204594 end=208842 cdsStart=204594 cdsEnd=208842 sfCount=8 sfStarts=204594,204793,205083,206969,207361,207835,208253,208564, sfEnds=204677,204861,205218,207201,207438,207903,208429,208842,	-	-	-
721475	0	20	0.01	6.69	9.38586	Up	8.22e-09	1.38e-07	jgi|Poptr1_1|721475|estExt_Genewise1_v1.C_LG_IX0700|CDS chrom=LG_IX strand=+ start=1290938 end=1293842 cdsStart=1291006 cdsEnd=1293715 sfCount=3 sfStarts=1290938,1293517,1293830, sfEnds=1291286,1293809,1293842,	-	-	-
830464	0	19	0.01	6.35	9.31061	Up	2.06e-08	3.24e-07	jgi|Poptr1_1|830464|estExt_fgenesh4_pm.C_LG_II0906|CDS chrom=LG_II strand=+ start=16549215 end=16550795 cdsStart=16549236 cdsEnd=16550795 sfCount=4 sfStarts=16549215,16549904,16550329,16550568, sfEnds=16549565,16550224,16550463,16550795,	-	GO:0016758//transferase activity, transferring hexosyl groups;GO:0008466//glycogenin glucosyltransferase activity	GO:0016051//carbohydrate biosynthetic process
572572	0	17	0.01	5.69	9.15228	Up	1.3e-07	1.8e-06	jgi|Poptr1_1|572572|eugene3.00140617|CDS chrom=LG_XIV strand=- start=4988695 end=4990342 cdsStart=4988695 cdsEnd=4990218 sfCount=4 sfStarts=4988695,4989027,4989254,4989889, sfEnds=4988919,4989161,4989574,4990342,	-	GO:0016758//transferase activity, transferring hexosyl groups;GO:0008466//glycogenin glucosyltransferase activity	GO:0016051//carbohydrate biosynthetic process
427138	0	17	0.01	5.69	9.15228	Up	1.3e-07	1.8e-06	jgi|Poptr1_1|427138|gw1.VI.810.1|CDS chrom=LG_VI strand=+ start=13386810 end=13387412 cdsStart=13386810 cdsEnd=13387412 sfCount=1 sfStarts=13386810, sfEnds=13387412,	-	-	-
752790	0	16	0.01	5.35	9.0634	Up	3.25e-07	4.26e-06	jgi|Poptr1_1|752790|fgenesh4_pg.C_LG_I002393|CDS chrom=LG_I strand=- start=24690214 end=24691352 cdsStart=24690214 cdsEnd=24691352 sfCount=3 sfStarts=24690214,24690569,24690962, sfEnds=24690420,24690846,24691352,	-	-	-
763444	0	16	0.01	5.35	9.0634	Up	3.25e-07	4.25e-06	jgi|Poptr1_1|763444|fgenesh4_pg.C_LG_VI001754|CDS chrom=LG_VI strand=- start=16866996 end=16868379 cdsStart=16866996 cdsEnd=16868379 sfCount=3 sfStarts=16866996,16867769,16868033, sfEnds=16867550,16867979,16868379,	-	GO:0004497//monooxygenase activity	GO:0006725//cellular aromatic compound metabolic process
803462	0	15	0.01	5.02	8.97154	Up	8.16e-07	9.99e-06	jgi|Poptr1_1|803462|fgenesh4_pm.C_LG_VIII000417|CDS chrom=LG_VIII strand=- start=6317900 end=6319392 cdsStart=6317900 cdsEnd=6319392 sfCount=4 sfStarts=6317900,6318208,6318511,6319087, sfEnds=6318115,6318342,6318831,6319392,	-	GO:0016758//transferase activity, transferring hexosyl groups;GO:0008466//glycogenin glucosyltransferase activity	GO:0016051//carbohydrate biosynthetic process
561855	0	15	0.01	5.02	8.97154	Up	8.16e-07	9.98e-06	jgi|Poptr1_1|561855|eugene3.00061814|CDS chrom=LG_VI strand=- start=16956292 end=16958695 cdsStart=16956476 cdsEnd=16958695 sfCount=9 sfStarts=16956292,16956703,16956870,16957123,16957332,16957838,16957990,16958128,16958462, sfEnds=16956548,16956771,16957018,16957254,16957657,16957874,16958044,16958189,16958695,	-	GO:0003847//1-alkyl-2-acetylglycerophosphocholine esterase activity	-
556104	0	14	0.01	4.68	8.87036	Up	2.05e-06	2.31e-05	jgi|Poptr1_1|556104|eugene3.00040817|CDS chrom=LG_IV strand=+ start=7931356 end=7934172 cdsStart=7931356 cdsEnd=7933921 sfCount=4 sfStarts=7931356,7931582,7931963,7932371, sfEnds=7931493,7931723,7932243,7934172,	-	GO:0051082//unfolded protein binding;GO:0005524//ATP binding;GO:0003763	GO:0006457//protein folding
816615	0	14	0.01	4.68	8.87036	Up	2.05e-06	2.31e-05	jgi|Poptr1_1|816615|estExt_fgenesh4_pg.C_LG_II1501|CDS chrom=LG_II strand=+ start=12611785 end=12612901 cdsStart=12611862 cdsEnd=12612660 sfCount=2 sfStarts=12611785,12612411, sfEnds=12612067,12612901,	-	-	GO:0009269//response to desiccation
851637	0	13	0.01	4.35	8.76487	Up	5.13e-06	5.34e-05	jgi|Poptr1_1|851637|e_gw1.II.284.1|CDS chrom=LG_II strand=- start=20816450 end=20817790 cdsStart=20816450 cdsEnd=20817790 sfCount=1 sfStarts=20816450, sfEnds=20817790,	-	-	-
1106398	0	13	0.01	4.35	8.76487	Up	5.13e-06	5.34e-05	jgi|Poptr1_1|1106398|estExt_Genewise1Plus.C_LG_XVIII1675|CDS chrom=LG_XVIII strand=- start=7032842 end=7033577 cdsStart=7033140 cdsEnd=7033343 sfCount=1 sfStarts=7032842, sfEnds=7033577,	-	-	-
831600	0	13	0.01	4.35	8.76487	Up	5.13e-06	5.34e-05	jgi|Poptr1_1|831600|estExt_fgenesh4_pm.C_LG_V0513|CDS chrom=LG_V strand=- start=14794724 end=14796248 cdsStart=14794843 cdsEnd=14796248 sfCount=4 sfStarts=14794724,14795164,14795799,14795999, sfEnds=14795049,14795321,14795912,14796248,	-	-	-
549817	0	12	0.01	4.01	8.64746	Up	1.29e-05	0.000120983	jgi|Poptr1_1|549817|eugene3.00012258|CDS chrom=LG_I strand=+ start=25265762 end=25266337 cdsStart=25265762 cdsEnd=25266337 sfCount=1 sfStarts=25265762, sfEnds=25266337,	GO:0005634//nucleus	-	GO:0006355//regulation of transcription, DNA-dependent
788162	0	12	0.01	4.01	8.64746	Up	1.29e-05	0.000120889	jgi|Poptr1_1|788162|fgenesh4_pg.C_scaffold_261000004|CDS chrom=scaffold_261 strand=+ start=53431 end=54186 cdsStart=53431 cdsEnd=54186 sfCount=1 sfStarts=53431, sfEnds=54186,	GO:0005634//nucleus	GO:0003676//nucleic acid binding;GO:0008270//zinc ion binding	-
587191	0	11	0.01	3.68	8.52356	Up	3.23e-05	0.000275712	jgi|Poptr1_1|587191|eugene3.02080008|CDS chrom=scaffold_208 strand=- start=104093 end=106194 cdsStart=104093 cdsEnd=106060 sfCount=2 sfStarts=104093, sfEnds=106194,	-	GO:0005524//ATP binding	-
817274	0	10	0.01	3.34	8.3837	Up	8.1e-05	0.000629122	jgi|Poptr1_1|817274|estExt_fgenesh4_pg.C_LG_III0867|CDS chrom=LG_III strand=+ start=10505979 end=10507046 cdsStart=10506067 cdsEnd=10506905 sfCount=2 sfStarts=10505979,10506493, sfEnds=10506295,10507046,	-	-	-
571733	0	10	0.01	3.34	8.3837	Up	8.1e-05	0.000628717	jgi|Poptr1_1|571733|eugene3.00131097|CDS chrom=LG_XIII strand=- start=11361936 end=11362584 cdsStart=11362354 cdsEnd=11362584 sfCount=3 sfStarts=11361936,11362139,11362477, sfEnds=11362093,11362425,11362584,	-	-	-
659379	0	10	0.01	3.34	8.3837	Up	8.1e-05	0.000628313	jgi|Poptr1_1|659379|grail3.0022001501|CDS chrom=LG_X strand=- start=15958515 end=15959331 cdsStart=15958751 cdsEnd=15959218 sfCount=1 sfStarts=15958515, sfEnds=15959331,	-	-	-
563887	10	204	2.22	68.23	4.94177	Up	9.69e-06	9.38e-05	jgi|Poptr1_1|563887|eugene3.00080482|CDS chrom=LG_VIII strand=+ start=2959328 end=2962010 cdsStart=2959400 cdsEnd=2962010 sfCount=2 sfStarts=2959328,2960278, sfEnds=2959613,2962010,	-	GO:0005524//ATP binding	-
1105606	5	94	1.11	31.44	4.82397	Up	6.63e-05	0.000523064	jgi|Poptr1_1|1105606|estExt_Genewise1Plus.C_LG_XVIII0270|CDS chrom=LG_XVIII strand=- start=2136477 end=2142287 cdsStart=2136477 cdsEnd=2142287 sfCount=12 sfStarts=2136477,2136930,2137568,2137709,2138703,2140236,2140621,2140815,2141056,2141400,2141587,2141952, sfEnds=2136644,2137118,2137618,2137828,2138774,2140328,2140721,2140883,2141233,2141495,2141838,2142287,	-	-	-
671670	14	189	3.1	63.21	4.34981	Up	1.75e-06	2e-05	jgi|Poptr1_1|671670|grail3.0133002101|CDS chrom=scaffold_133 strand=+ start=187774 end=188850 cdsStart=187939 cdsEnd=188850 sfCount=1 sfStarts=187774, sfEnds=188850,	-	-	-
723183	3	33	0.67	11.04	4.04244	Up	0.000121911	0.000906368	jgi|Poptr1_1|723183|estExt_Genewise1_v1.C_LG_IX3982|CDS chrom=LG_IX strand=+ start=8168808 end=8169592 cdsStart=8168901 cdsEnd=8169371 sfCount=1 sfStarts=8168808, sfEnds=8169592,	-	-	-
228694	4	43	0.89	14.38	4.01411	Up	9.16e-05	0.000702093	jgi|Poptr1_1|228694|gw1.X.3391.1|CDS chrom=LG_X strand=- start=20740198 end=20741519 cdsStart=20740198 cdsEnd=20741519 sfCount=2 sfStarts=20741161,20740198, sfEnds=20741519,20740444,	GO:0005634//nucleus	GO:0003677//DNA binding	-
558228	8	64	1.77	21.4	3.59579	Up	2.18e-05	0.000193989	jgi|Poptr1_1|558228|eugene3.00091488|CDS chrom=LG_IX strand=+ start=10239805 end=10242104 cdsStart=10239947 cdsEnd=10241902 sfCount=6 sfStarts=10239805,10240346,10240626,10240945,10241298,10241586, sfEnds=10240096,10240511,10240764,10241221,10241496,10242104,	-	GO:0031072//heat shock protein binding;GO:0051082//unfolded protein binding	GO:0006457//protein folding
580388	4	28	0.89	9.36	3.39463	Up	9.17e-05	0.000700991	jgi|Poptr1_1|580388|eugene3.01200073|CDS chrom=scaffold_120 strand=- start=714065 end=714678 cdsStart=714219 cdsEnd=714458 sfCount=1 sfStarts=714065, sfEnds=714678,	-	-	-
556814	11	55	2.44	18.39	2.91397	Up	6.38e-06	6.44e-05	jgi|Poptr1_1|556814|eugene3.00090074|CDS chrom=LG_IX strand=+ start=458088 end=459253 cdsStart=458088 cdsEnd=458900 sfCount=2 sfStarts=458088, sfEnds=459253,	-	-	-
554771	6	29	1.33	9.7	2.86656	Up	4.68e-05	0.000382692	jgi|Poptr1_1|554771|eugene3.00031404|CDS chrom=LG_III strand=- start=15223420 end=15225328 cdsStart=15223736 cdsEnd=15225232 sfCount=2 sfStarts=15223420,15224936, sfEnds=15223810,15225328,	GO:0005622//intracellular;GO:0005634//nucleus	GO:0008565//protein transporter activity	GO:0006606//protein import into nucleus
564400	5	24	1.11	8.03	2.85484	Up	6.89e-05	0.000542244	jgi|Poptr1_1|564400|eugene3.00080995|CDS chrom=LG_VIII strand=- start=6712271 end=6713140 cdsStart=6712375 cdsEnd=6712806 sfCount=1 sfStarts=6712271, sfEnds=6713140,	GO:0005634//nucleus	GO:0003677//DNA binding	GO:0006355//regulation of transcription, DNA-dependent
891190	253	1186	56.11	396.65	2.82154	Up	1.47e-13	4.58e-12	jgi|Poptr1_1|891190|e_gw1.XII.485.1|CDS chrom=LG_XII strand=+ start=1325700 end=1327802 cdsStart=1325700 cdsEnd=1327802 sfCount=4 sfStarts=1325700,1326391,1327098,1327743, sfEnds=1326032,1326519,1327586,1327802,	-	-	-
832078	6	28	1.33	9.36	2.81508	Up	4.71e-05	0.00038441	jgi|Poptr1_1|832078|estExt_fgenesh4_pm.C_LG_VI0650|CDS chrom=LG_VI strand=+ start=14964013 end=14965409 cdsStart=14964129 cdsEnd=14964602 sfCount=2 sfStarts=14964013,14965296, sfEnds=14964869,14965409,	-	-	-
728730	8	32	1.77	10.7	2.59579	Up	2.21e-05	0.000196117	jgi|Poptr1_1|728730|estExt_Genewise1_v1.C_LG_XII0729|CDS chrom=LG_XII strand=+ start=10392714 end=10394312 cdsStart=10392798 cdsEnd=10394074 sfCount=5 sfStarts=10392714,10392989,10393256,10393572,10393976, sfEnds=10392893,10393138,10393490,10393849,10394312,	-	-	-
865885	7	27	1.55	9.03	2.54246	Up	3.51e-05	0.000297933	jgi|Poptr1_1|865885|e_gw1.VI.2354.1|CDS chrom=LG_VI strand=+ start=1105508 end=1105693 cdsStart=1105508 cdsEnd=1105693 sfCount=1 sfStarts=1105508, sfEnds=1105693,	-	-	-
232773	19	73	4.21	24.41	2.53558	Up	1.87e-07	2.54e-06	jgi|Poptr1_1|232773|gw1.XI.753.1|CDS chrom=LG_XI strand=- start=13900867 end=13910386 cdsStart=13900867 cdsEnd=13910386 sfCount=22 sfStarts=13910336,13909918,13909549,13909000,13908047,13907779,13907526,13907198,13906366,13906135,13905836,13905046,13904860,13904562,13904281,13904035,13903138,13902825,13902300,13901986,13901272,13900867, sfEnds=13910386,13910049,13909833,13909310,13908146,13907960…	GO:0005856//cytoskeleton;GO:0005875//microtubule associated complex	GO:0003777//microtubule motor activity;GO:0005524//ATP binding	GO:0007018//microtubule-based movement
1077620	14	53	3.1	17.73	2.51585	Up	1.75e-06	2e-05	jgi|Poptr1_1|1077620|estExt_Genewise1Plus.C_LG_V0956|CDS chrom=LG_V strand=- start=2635265 end=2639004 cdsStart=2635532 cdsEnd=2639004 sfCount=3 sfStarts=2635265,2638325,2638900, sfEnds=2636302,2638459,2639004,	-	-	-
944805	7	26	1.55	8.7	2.48875	Up	3.81e-05	0.000321435	jgi|Poptr1_1|944805|e_gw1.3587.2.1|CDS chrom=scaffold_3587 strand=+ start=3 end=1466 cdsStart=3 cdsEnd=1466 sfCount=4 sfStarts=3,501,870,1276, sfEnds=129,769,1182,1466,	-	-	-
646335	53	185	11.75	61.87	2.39658	Up	1.67e-13	5.18e-12	jgi|Poptr1_1|646335|grail3.0018007101|CDS chrom=LG_III strand=+ start=9900398 end=9902323 cdsStart=9900493 cdsEnd=9902106 sfCount=1 sfStarts=9900398, sfEnds=9902323,	-	GO:0016758//transferase activity, transferring hexosyl groups	GO:0008152//metabolic process
240188	18	62	3.99	20.74	2.37796	Up	2.94e-07	3.89e-06	jgi|Poptr1_1|240188|gw1.XIII.437.1|CDS chrom=LG_XIII strand=+ start=220100 end=220558 cdsStart=220100 cdsEnd=220558 sfCount=1 sfStarts=220100, sfEnds=220558,	GO:0005634//nucleus	GO:0003700//transcription factor activity	GO:0006355//regulation of transcription, DNA-dependent
649204	34	113	7.54	37.79	2.32537	Up	1.77e-10	3.66e-09	jgi|Poptr1_1|649204|grail3.0001027501|CDS chrom=LG_IX strand=- start=2006374 end=2007753 cdsStart=2006381 cdsEnd=2007740 sfCount=2 sfStarts=2006374,2007438, sfEnds=2006554,2007753,	-	-	-
815396	78	249	17.3	83.28	2.2672	Up	0	0	jgi|Poptr1_1|815396|estExt_fgenesh4_pg.C_LG_I1883|CDS chrom=LG_I strand=- start=19051735 end=19053753 cdsStart=19051928 cdsEnd=19053073 sfCount=2 sfStarts=19051735,19053683, sfEnds=19053075,19053753,	-	-	GO:0006464//protein modification process
894280	41	120	9.09	40.13	2.14233	Up	7.27e-12	1.71e-10	jgi|Poptr1_1|894280|e_gw1.XIII.2029.1|CDS chrom=LG_XIII strand=- start=4291663 end=4294176 cdsStart=4291663 cdsEnd=4294176 sfCount=2 sfStarts=4291663,4292839, sfEnds=4292154,4294176,	-	-	-
292686	15	43	3.33	14.38	2.11047	Up	1.26e-06	1.49e-05	jgi|Poptr1_1|292686|gw1.64.338.1|CDS chrom=scaffold_64 strand=+ start=759521 end=759970 cdsStart=759521 cdsEnd=759970 sfCount=1 sfStarts=759521, sfEnds=759970,	-	GO:0005509//calcium ion binding	-
569578	45	127	9.98	42.47	2.08933	Up	1.36e-12	3.59e-11	jgi|Poptr1_1|569578|eugene3.00120231|CDS chrom=LG_XII strand=+ start=2121087 end=2124025 cdsStart=2121087 cdsEnd=2124025 sfCount=7 sfStarts=2121087,2121588,2121955,2122270,2123096,2123343,2123524, sfEnds=2121147,2121855,2122169,2122992,2123250,2123425,2124025,	-	GO:0005524//ATP binding	-
822568	18	50	3.99	16.72	2.06711	Up	3.14e-07	4.13e-06	jgi|Poptr1_1|822568|estExt_fgenesh4_pg.C_LG_X2015|CDS chrom=LG_X strand=- start=19103890 end=19106396 cdsStart=19104327 cdsEnd=19105990 sfCount=4 sfStarts=19103890,19104865,19105736,19106340, sfEnds=19104783,19105130,19106030,19106396,	GO:0005634//nucleus	GO:0003700//transcription factor activity	GO:0006355//regulation of transcription, DNA-dependent
1107910	11	30	2.44	10.03	2.03937	Up	2.34e-05	0.000207252	jgi|Poptr1_1|1107910|estExt_Genewise1Plus.C_LG_XIX0978|CDS chrom=LG_XIX strand=+ start=4958406 end=4960809 cdsStart=4958406 cdsEnd=4960809 sfCount=2 sfStarts=4958406,4960315, sfEnds=4959740,4960809,	-	-	-
566575	19	51	4.21	17.06	2.01873	Up	2.12e-07	2.85e-06	jgi|Poptr1_1|566575|eugene3.00101133|CDS chrom=LG_X strand=+ start=12083300 end=12084991 cdsStart=12083300 cdsEnd=12084991 sfCount=4 sfStarts=12083300,12083636,12084449,12084737, sfEnds=12083405,12084366,12084649,12084991,	-	-	-
762094	338	893	74.96	298.66	1.99431	Up	1.4e-13	4.4e-12	jgi|Poptr1_1|762094|fgenesh4_pg.C_LG_VI000404|CDS chrom=LG_VI strand=+ start=3223689 end=3226273 cdsStart=3223689 cdsEnd=3226273 sfCount=9 sfStarts=3223689,3224915,3225083,3225239,3225450,3225597,3225726,3225824,3226186, sfEnds=3223870,3224996,3225147,3225338,3225491,3225638,3225757,3225877,3226273,	GO:0005634//nucleus	GO:0003700//transcription factor activity	GO:0006355//regulation of transcription, DNA-dependent
738036	30	77	6.65	25.75	1.95315	Up	1.17e-09	2.19e-08	jgi|Poptr1_1|738036|estExt_Genewise1_v1.C_LG_XVIII3283|CDS chrom=LG_XVIII strand=+ start=11059134 end=11063256 cdsStart=11059228 cdsEnd=11062963 sfCount=6 sfStarts=11059134,11059646,11060310,11060578,11061637,11062913, sfEnds=11059420,11059743,11060414,11060643,11061723,11063256,	-	-	-
554739	11	28	2.44	9.36	1.93963	Up	6.53e-05	0.000516307	jgi|Poptr1_1|554739|eugene3.00031372|CDS chrom=LG_III strand=+ start=14995574 end=14997166 cdsStart=14995574 cdsEnd=14997166 sfCount=1 sfStarts=14995574, sfEnds=14997166,	-	GO:0005515//protein binding;GO:0004308//exo-alpha-sialidase activity	GO:0006915//apoptosis
1080580	58	130	12.86	43.48	1.75746	Up	1.07e-13	3.44e-12	jgi|Poptr1_1|1080580|estExt_Genewise1Plus.C_LG_VI0890|CDS chrom=LG_VI strand=+ start=5332124 end=5335067 cdsStart=5332369 cdsEnd=5334844 sfCount=6 sfStarts=5332124,5332651,5332809,5333955,5334112,5334710, sfEnds=5332569,5332704,5332889,5334024,5334200,5335067,	-	-	-
926033	19	41	4.21	13.71	1.70334	Up	9.09e-06	8.89e-05	jgi|Poptr1_1|926033|e_gw1.123.24.1|CDS chrom=scaffold_123 strand=- start=91123 end=91561 cdsStart=91123 cdsEnd=91561 sfCount=2 sfStarts=91123,91481, sfEnds=91404,91561,	-	-	-
816297	37	75	8.21	25.08	1.61108	Up	7.54e-09	1.27e-07	jgi|Poptr1_1|816297|estExt_fgenesh4_pg.C_LG_II0790|CDS chrom=LG_II strand=+ start=6121226 end=6124091 cdsStart=6121272 cdsEnd=6123901 sfCount=4 sfStarts=6121226,6121449,6123334,6123828, sfEnds=6121360,6121546,6123366,6124091,	-	GO:0005554	-
832274	26	51	5.77	17.06	1.56397	Up	3.16e-06	3.44e-05	jgi|Poptr1_1|832274|estExt_fgenesh4_pm.C_LG_VII0199|CDS chrom=LG_VII strand=+ start=4117033 end=4120848 cdsStart=4117033 cdsEnd=4120806 sfCount=7 sfStarts=4117033,4117943,4118593,4119789,4120063,4120309,4120651, sfEnds=4117478,4118058,4119473,4119968,4120229,4120432,4120848,	GO:0005777//peroxisome	GO:0003997//acyl-CoA oxidase activity;GO:0016491//oxidoreductase activity	GO:0006635//fatty acid beta-oxidation;GO:0006118//electron transport
655259	26	51	5.77	17.06	1.56397	Up	3.16e-06	3.43e-05	jgi|Poptr1_1|655259|grail3.0019015501|CDS chrom=LG_VII strand=- start=10438790 end=10440634 cdsStart=10438842 cdsEnd=10440617 sfCount=2 sfStarts=10438790,10440082, sfEnds=10439070,10440634,	-	GO:0010181//FMN binding;GO:0016491//oxidoreductase activity	-
559581	12441	23859	2759.05	7979.47	1.53212	Up	0	0	jgi|Poptr1_1|559581|eugene3.00051196|CDS chrom=LG_V strand=+ start=14668153 end=14668392 cdsStart=14668153 cdsEnd=14668392 sfCount=1 sfStarts=14668153, sfEnds=14668392,	-	-	-
550613	66	126	14.64	42.14	1.52527	Up	4.68e-13	1.35e-11	jgi|Poptr1_1|550613|eugene3.00013054|CDS chrom=LG_I strand=+ start=35018810 end=35021930 cdsStart=35018888 cdsEnd=35021654 sfCount=3 sfStarts=35018810,35019598,35019820, sfEnds=35019010,35019739,35021930,	-	GO:0051082//unfolded protein binding;GO:0005524//ATP binding;GO:0003763	GO:0006457//protein folding
657649	31	59	6.87	19.73	1.52201	Up	9.16e-07	1.11e-05	jgi|Poptr1_1|657649|grail3.0009047601|CDS chrom=LG_VIII strand=+ start=13927079 end=13931851 cdsStart=13927190 cdsEnd=13931661 sfCount=4 sfStarts=13927079,13928540,13930544,13931486, sfEnds=13927617,13928597,13930820,13931851,	-	GO:0005515//protein binding	-
640355	348	652	77.18	218.06	1.49843	Up	0	0	jgi|Poptr1_1|640355|grail3.0008036902|CDS chrom=LG_I strand=- start=6630980 end=6633823 cdsStart=6631133 cdsEnd=6633749 sfCount=7 sfStarts=6630980,6631364,6631559,6631928,6632087,6633077,6633665, sfEnds=6631256,6631476,6631726,6631978,6632124,6633211,6633823,	-	GO:0004550//nucleoside diphosphate kinase activity;GO:0005524//ATP binding	GO:0006183//GTP biosynthetic process;GO:0006228//UTP biosynthetic process;GO:0006241//CTP biosynthetic process
651162	23	43	5.1	14.38	1.49549	Up	3.53e-05	0.000299121	jgi|Poptr1_1|651162|grail3.0027014001|CDS chrom=LG_V strand=- start=6851899 end=6852614 cdsStart=6852224 cdsEnd=6852412 sfCount=1 sfStarts=6851899, sfEnds=6852614,	-	-	-
708898	35	65	7.76	21.74	1.48622	Up	4.14e-07	5.37e-06	jgi|Poptr1_1|708898|estExt_Genewise1_v1.C_LG_I8055|CDS chrom=LG_I strand=- start=5177899 end=5181030 cdsStart=5178215 cdsEnd=5180886 sfCount=4 sfStarts=5177899,5180573,5180801,5180965, sfEnds=5178318,5180679,5180936,5181030,	-	-	-
548701	31	57	6.87	19.06	1.47217	Up	2.53e-06	2.79e-05	jgi|Poptr1_1|548701|eugene3.00011142|CDS chrom=LG_I strand=+ start=10734232 end=10736267 cdsStart=10734344 cdsEnd=10736020 sfCount=2 sfStarts=10734232,10735767, sfEnds=10734488,10736267,	-	GO:0005489//electron transporter activity	GO:0006118//electron transport
876970	233	428	51.67	143.14	1.47003	Up	0	0	jgi|Poptr1_1|876970|e_gw1.IX.4480.1|CDS chrom=LG_IX strand=- start=9458090 end=9458486 cdsStart=9458090 cdsEnd=9458486 sfCount=2 sfStarts=9458090,9458388, sfEnds=9458293,9458486,	-	-	-
1118968	26	47	5.77	15.72	1.44596	Up	2.46e-05	0.000216771	jgi|Poptr1_1|1118968|estExt_Genewise1Plus.C_2610044|CDS chrom=scaffold_261 strand=- start=151176 end=154069 cdsStart=151481 cdsEnd=154023 sfCount=2 sfStarts=151176,153810, sfEnds=153213,154069,	-	-	-
737400	27	48	5.99	16.05	1.42195	Up	2.56e-05	0.000224982	jgi|Poptr1_1|737400|estExt_Genewise1_v1.C_LG_XVIII1941|CDS chrom=LG_XVIII strand=- start=6436726 end=6437329 cdsStart=6436958 cdsEnd=6437260 sfCount=1 sfStarts=6436726, sfEnds=6437329,	-	-	-
675828	27	48	5.99	16.05	1.42195	Up	2.56e-05	0.000224818	jgi|Poptr1_1|675828|grail3.0028000301|CDS chrom=scaffold_28 strand=- start=49885 end=50295 cdsStart=49903 cdsEnd=50082 sfCount=1 sfStarts=49885, sfEnds=50295,	-	-	-
597100	529	926	117.32	309.69	1.40038	Up	0	0	jgi|Poptr1_1|597100|eugene3.00880050|CDS chrom=scaffold_88 strand=- start=592314 end=595629 cdsStart=592506 cdsEnd=595523 sfCount=3 sfStarts=592314,595078,595481, sfEnds=592554,595417,595629,	GO:0016021//integral to membrane	GO:0001584	GO:0007186//G-protein coupled receptor protein signaling pathway
553228	87	151	19.29	50.5	1.38843	Up	1.04e-13	3.35e-12	jgi|Poptr1_1|553228|eugene3.00002543|CDS chrom=LG_II strand=+ start=23127981 end=23129333 cdsStart=23127981 cdsEnd=23129333 sfCount=2 sfStarts=23127981,23128487, sfEnds=23128399,23129333,	GO:0005952//cAMP-dependent protein kinase complex;GO:0005956//protein kinase CK2 complex	GO:0004672//protein kinase activity;GO:0005524//ATP binding;GO:0004713//protein tyrosine kinase activity;GO:0004674//protein serine/threonine kinase activity;GO:0004682//protein kinase CK2 activity;GO:0004691//cAMP-dependent protein kinase activity;GO:0008603//cAMP-dependent protein kinase regulator activity;GO:0008605//protein kinase CK2 regulator activity	GO:0006468//protein amino acid phosphorylation
564874	112	194	24.84	64.88	1.38511	Up	0	0	jgi|Poptr1_1|564874|eugene3.00081469|CDS chrom=LG_VIII strand=- start=10658758 end=10661485 cdsStart=10658988 cdsEnd=10661401 sfCount=4 sfStarts=10658758,10659292,10660880,10661149, sfEnds=10659194,10659449,10660993,10661485,	-	-	-
828781	320	538	70.97	179.93	1.34215	Up	0	0	jgi|Poptr1_1|828781|estExt_fgenesh4_pg.C_2580005|CDS chrom=scaffold_258 strand=+ start=55455 end=59356 cdsStart=55509 cdsEnd=58857 sfCount=6 sfStarts=55455,55937,56388,58513,58699,59344, sfEnds=55600,55963,56476,58622,59016,59356,	GO:0005743//mitochondrial inner membrane	GO:0005489//electron transporter activity;GO:0008137//NADH dehydrogenase (ubiquinone) activity	GO:0006118//electron transport
725114	31	52	6.87	17.39	1.33988	Up	2.9e-05	0.000249695	jgi|Poptr1_1|725114|estExt_Genewise1_v1.C_LG_X2891|CDS chrom=LG_X strand=+ start=19618955 end=19622259 cdsStart=19618977 cdsEnd=19622174 sfCount=3 sfStarts=19618955,19622140,19622230, sfEnds=19619364,19622202,19622259,	-	-	-
835439	55	92	12.2	30.77	1.33464	Up	2.89e-08	4.36e-07	jgi|Poptr1_1|835439|estExt_fgenesh4_pm.C_LG_XVI0194|CDS chrom=LG_XVI strand=+ start=4123092 end=4124672 cdsStart=4123120 cdsEnd=4124473 sfCount=2 sfStarts=4123092,4124216, sfEnds=4123356,4124672,	GO:0005622//intracellular;GO:0005840//ribosome	GO:0003735//structural constituent of ribosome	GO:0006412//translation
800974	157	258	34.82	86.29	1.30928	Up	0	0	jgi|Poptr1_1|800974|fgenesh4_pm.C_LG_V000066|CDS chrom=LG_V strand=- start=1242603 end=1244934 cdsStart=1242603 cdsEnd=1244934 sfCount=6 sfStarts=1242603,1242907,1243588,1243930,1244607,1244818, sfEnds=1242746,1242997,1243699,1244018,1244677,1244934,	-	GO:0005525//GTP binding;GO:0003924//GTPase activity;GO:0003925//small monomeric GTPase activity	GO:0007264//small GTPase mediated signal transduction;GO:0006886//intracellular protein transport;GO:0015031//protein transport
573947	256	420	56.77	140.47	1.30706	Up	0	0	jgi|Poptr1_1|573947|eugene3.00190421|CDS chrom=LG_XIX strand=+ start=5367068 end=5369179 cdsStart=5368172 cdsEnd=5369179 sfCount=2 sfStarts=5367068,5368109, sfEnds=5367142,5369179,	-	-	-
1106960	59	96	13.08	32.11	1.29566	Up	3.13e-08	4.7e-07	jgi|Poptr1_1|1106960|estExt_Genewise1Plus.C_LG_XVIII2520|CDS chrom=LG_XVIII strand=- start=10297923 end=10304249 cdsStart=10298206 cdsEnd=10303647 sfCount=15 sfStarts=10297923,10299370,10300387,10300840,10301014,10301262,10301451,10301652,10301821,10302305,10302592,10302856,10303251,10303437,10304101, sfEnds=10298338,10299563,10300475,10300930,10301142,10301318,10301543,10301717,10301907,10302374…	-	-	-
263506	166	268	36.81	89.63	1.28388	Up	1.25e-13	3.93e-12	jgi|Poptr1_1|263506|gw1.107.139.1|CDS chrom=scaffold_107 strand=+ start=682834 end=683517 cdsStart=682834 cdsEnd=683517 sfCount=1 sfStarts=682834, sfEnds=683517,	GO:0000151//ubiquitin ligase complex	GO:0004842//ubiquitin-protein ligase activity;GO:0008270//zinc ion binding	GO:0016567//protein ubiquitination
719701	31	50	6.87	16.72	1.28319	Up	7.38e-05	0.000577987	jgi|Poptr1_1|719701|estExt_Genewise1_v1.C_LG_VII3878|CDS chrom=LG_VII strand=- start=11614154 end=11616258 cdsStart=11614674 cdsEnd=11615666 sfCount=8 sfStarts=11614154,11614212,11614672,11614932,11615125,11615595,11615775,11616254, sfEnds=11614192,11614392,11614844,11615022,11615201,11615672,11615846,11616258,	GO:0000786//nucleosome;GO:0005634//nucleus	GO:0003677//DNA binding	GO:0006334//nucleosome assembly;GO:0007001
548036	434	700	96.25	234.11	1.28233	Up	3.98e-13	1.16e-11	jgi|Poptr1_1|548036|eugene3.00010477|CDS chrom=LG_I strand=+ start=4147413 end=4149694 cdsStart=4147604 cdsEnd=4149325 sfCount=2 sfStarts=4147413,4149251, sfEnds=4147900,4149694,	GO:0005622//intracellular;GO:0005634//nucleus	GO:0008565//protein transporter activity	GO:0006606//protein import into nucleus
648984	71	113	15.75	37.79	1.26265	Up	3.94e-09	6.9e-08	jgi|Poptr1_1|648984|grail3.0001009101|CDS chrom=LG_IX strand=+ start=610171 end=612506 cdsStart=610226 cdsEnd=612158 sfCount=6 sfStarts=610171,610352,610852,611567,611882,612066, sfEnds=610271,610491,610934,611771,611950,612506,	-	GO:0005525//GTP binding;GO:0003677//DNA binding;GO:0003924//GTPase activity;GO:0003925//small monomeric GTPase activity	GO:0007264//small GTPase mediated signal transduction;GO:0006886//intracellular protein transport;GO:0000160//two-component signal transduction system (phosphorelay);GO:0006355//regulation of transcription, DNA-dependent;GO:0015031//protein transport
658951	58	92	12.86	30.77	1.25863	Up	1.19e-07	1.66e-06	jgi|Poptr1_1|658951|grail3.0006038201|CDS chrom=LG_X strand=- start=12922290 end=12924917 cdsStart=12922290 cdsEnd=12924824 sfCount=6 sfStarts=12922290,12922955,12923640,12924375,12924549,12924822, sfEnds=12922816,12923114,12923748,12924454,12924611,12924917,	-	-	-
707493	47	73	10.42	24.41	1.22812	Up	3.71e-06	3.98e-05	jgi|Poptr1_1|707493|estExt_Genewise1_v1.C_LG_I4261|CDS chrom=LG_I strand=+ start=27778383 end=27781555 cdsStart=27778401 cdsEnd=27781272 sfCount=6 sfStarts=27778383,27779208,27779552,27779767,27780517,27781180, sfEnds=27778655,27779368,27779652,27779948,27780615,27781555,	-	GO:0004427//inorganic diphosphatase activity	-
586571	1374	2132	304.71	713.03	1.22653	Up	4.27e-12	1.04e-10	jgi|Poptr1_1|586571|eugene3.01970013|CDS chrom=scaffold_197 strand=+ start=164544 end=165083 cdsStart=164544 cdsEnd=165083 sfCount=2 sfStarts=164544,165010, sfEnds=164664,165083,	-	-	-
831312	380	587	84.27	196.32	1.22012	Up	0	0	jgi|Poptr1_1|831312|estExt_fgenesh4_pm.C_LG_IV0530|CDS chrom=LG_IV strand=- start=15795488 end=15799762 cdsStart=15795715 cdsEnd=15799762 sfCount=9 sfStarts=15795488,15796433,15796626,15796802,15798223,15798351,15799312,15799442,15799650, sfEnds=15795906,15796535,15796705,15796884,15798271,15798416,15799361,15799566,15799762,	-	GO:0004601//peroxidase activity;GO:0016688//L-ascorbate peroxidase activity	GO:0006979//response to oxidative stress
829205	55	84	12.2	28.09	1.20318	Up	1.04e-06	1.25e-05	jgi|Poptr1_1|829205|estExt_fgenesh4_pg.C_61700001|CDS chrom=scaffold_6170 strand=- start=162 end=1832 cdsStart=415 cdsEnd=1755 sfCount=3 sfStarts=162,1060,1644, sfEnds=510,1193,1832,	-	GO:0005489//electron transporter activity	GO:0006118//electron transport
835941	65	99	14.42	33.11	1.1992	Up	1.23e-07	1.72e-06	jgi|Poptr1_1|835941|estExt_fgenesh4_pm.C_LG_XVIII0336|CDS chrom=LG_XVIII strand=- start=10544824 end=10549879 cdsStart=10545042 cdsEnd=10549795 sfCount=6 sfStarts=10544824,10547781,10549126,10549331,10549508,10549726, sfEnds=10545092,10547855,10549235,10549427,10549632,10549879,	GO:0005963;GO:0017023//myosin phosphatase complex	GO:0005509//calcium ion binding;GO:0000158;GO:0004721//phosphoprotein phosphatase activity;GO:0004723//calcium-dependent protein serine/threonine phosphatase activity;GO:0004724//magnesium-dependent protein serine/threonine phosphatase activity;GO:0008420//CTD phosphatase activity;GO:0008597//calcium-dependent protein serine/threonine phosphatase regulator activity;GO:0015071;GO:0017018//myosin p…	-
813631	39	59	8.65	19.73	1.18962	Up	4.97e-05	0.000403321	jgi|Poptr1_1|813631|estExt_fgenesh4_kg.C_LG_II0004|CDS chrom=LG_II strand=- start=1069524 end=1070644 cdsStart=1069724 cdsEnd=1070485 sfCount=2 sfStarts=1069524,1070186, sfEnds=1069897,1070644,	-	-	-
262485	313	473	69.41	158.19	1.18844	Up	0	0	jgi|Poptr1_1|262485|gw1.XVIII.3026.1|CDS chrom=LG_XVIII strand=- start=10236265 end=10238094 cdsStart=10236265 cdsEnd=10238094 sfCount=2 sfStarts=10237588,10236265, sfEnds=10238094,10236549,	GO:0016021//integral to membrane	GO:0046872//metal ion binding	GO:0030001//metal ion transport
829835	65	98	14.42	32.78	1.18474	Up	1.89e-07	2.56e-06	jgi|Poptr1_1|829835|estExt_fgenesh4_pm.C_LG_I1023|CDS chrom=LG_I strand=+ start=26412640 end=26415499 cdsStart=26414010 cdsEnd=26415229 sfCount=6 sfStarts=26412640,26413149,26414207,26414433,26414671,26414936, sfEnds=26413125,26414102,26414286,26414577,26414802,26415499,	-	GO:0008757//S-adenosylmethionine-dependent methyltransferase activity;GO:0008171//O-methyltransferase activity;GO:0042409//caffeoyl-CoA O-methyltransferase activity	-
1082094	159	238	35.26	79.6	1.17474	Up	0	0	jgi|Poptr1_1|1082094|estExt_Genewise1Plus.C_LG_VII0653|CDS chrom=LG_VII strand=+ start=1381182 end=1384771 cdsStart=1381966 cdsEnd=1384771 sfCount=8 sfStarts=1381182,1381881,1382651,1383049,1383282,1384158,1384409,1384634, sfEnds=1381268,1382059,1382904,1383175,1383555,1384290,1384495,1384771,	-	-	-
558551	110	163	24.39	54.51	1.16023	Up	4.03e-11	8.81e-10	jgi|Poptr1_1|558551|eugene3.00050166|CDS chrom=LG_V strand=+ start=1383974 end=1384810 cdsStart=1383974 cdsEnd=1384810 sfCount=1 sfStarts=1383974, sfEnds=1384810,	-	-	-
741425	69	101	15.3	33.78	1.14264	Up	2.83e-07	3.76e-06	jgi|Poptr1_1|741425|estExt_Genewise1_v1.C_640223|CDS chrom=scaffold_64 strand=- start=438586 end=442043 cdsStart=438851 cdsEnd=441527 sfCount=8 sfStarts=438586,440207,440372,440569,440752,441497,441709,441976, sfEnds=438889,440288,440469,440649,440843,441570,441769,442043,	-	-	-
717167	1482	2154	328.66	720.39	1.13218	Up	3.93e-12	9.72e-11	jgi|Poptr1_1|717167|estExt_Genewise1_v1.C_LG_VI1074|CDS chrom=LG_VI strand=+ start=1731258 end=1732951 cdsStart=1731327 cdsEnd=1732636 sfCount=2 sfStarts=1731258,1732263, sfEnds=1731402,1732951,	-	-	-
814451	62	89	13.75	29.77	1.11443	Up	2.32e-06	2.57e-05	jgi|Poptr1_1|814451|estExt_fgenesh4_kg.C_LG_XVI0032|CDS chrom=LG_XVI strand=+ start=7410594 end=7414685 cdsStart=7410706 cdsEnd=7413910 sfCount=5 sfStarts=7410594,7410896,7411072,7413817,7414313, sfEnds=7410784,7410948,7411172,7413911,7414685,	-	-	-
830825	180	257	39.92	85.95	1.10639	Up	2.04e-13	6.2e-12	jgi|Poptr1_1|830825|estExt_fgenesh4_pm.C_LG_III0384|CDS chrom=LG_III strand=- start=11697654 end=11701038 cdsStart=11698367 cdsEnd=11701038 sfCount=5 sfStarts=11697654,11698662,11699302,11699719,11700764, sfEnds=11698478,11698912,11699465,11699882,11701038,	GO:0016020//membrane	GO:0005215//transporter activity	GO:0006810//transport
580378	283	404	62.76	135.11	1.10622	Up	0	0	jgi|Poptr1_1|580378|eugene3.01200063|CDS chrom=scaffold_120 strand=- start=627285 end=627584 cdsStart=627285 cdsEnd=627584 sfCount=1 sfStarts=627285, sfEnds=627584,	-	-	-
715914	463	659	102.68	220.4	1.10197	Up	8.8e-13	2.41e-11	jgi|Poptr1_1|715914|estExt_Genewise1_v1.C_LG_V2845|CDS chrom=LG_V strand=- start=1374511 end=1375458 cdsStart=1374797 cdsEnd=1375422 sfCount=2 sfStarts=1374511,1375351, sfEnds=1375240,1375458,	-	-	-
676443	121	171	26.83	57.19	1.09192	Up	1.23e-10	2.59e-09	jgi|Poptr1_1|676443|grail3.0029009101|CDS chrom=scaffold_29 strand=+ start=1066826 end=1068726 cdsStart=1066876 cdsEnd=1068588 sfCount=6 sfStarts=1066826,1067232,1067503,1067977,1068279,1068541, sfEnds=1066992,1067375,1067594,1068163,1068434,1068726,	-	-	-
570806	148	209	32.82	69.9	1.09072	Up	1.01e-12	2.71e-11	jgi|Poptr1_1|570806|eugene3.00130170|CDS chrom=LG_XIII strand=- start=1219070 end=1220141 cdsStart=1219177 cdsEnd=1220046 sfCount=1 sfStarts=1219070, sfEnds=1220141,	-	-	-
665494	1550	2167	343.74	724.74	1.07615	Up	4.23e-12	1.03e-10	jgi|Poptr1_1|665494|grail3.0065006504|CDS chrom=LG_XIX strand=- start=5513433 end=5526222 cdsStart=5525884 cdsEnd=5526174 sfCount=4 sfStarts=5513433,5525566,5525857,5525857, sfEnds=5513460,5525610,5526220,5526222,	-	-	GO:0006950//response to stress;GO:0009415//response to water
173884	1230	1704	272.78	569.89	1.06295	Up	9.85e-13	2.65e-11	jgi|Poptr1_1|173884|gw1.I.2484.1|CDS chrom=LG_I strand=+ start=21739600 end=21740650 cdsStart=21739600 cdsEnd=21740650 sfCount=4 sfStarts=21739600,21739755,21740400,21740583, sfEnds=21739655,21739843,21740498,21740650,	-	GO:0005489//electron transporter activity	GO:0006118//electron transport;GO:0045454//cell redox homeostasis
836143	1203	1654	266.79	553.17	1.05202	Up	0	0	jgi|Poptr1_1|836143|estExt_fgenesh4_pm.C_LG_XIX0276|CDS chrom=LG_XIX strand=- start=10891233 end=10893272 cdsStart=10891473 cdsEnd=10893227 sfCount=4 sfStarts=10891233,10891683,10892078,10893218, sfEnds=10891541,10891764,10892579,10893272,	GO:0005622//intracellular;GO:0005840//ribosome	GO:0003735//structural constituent of ribosome	GO:0006412//translation
734833	57	78	12.64	26.09	1.0455	Up	2.71e-05	0.000236057	jgi|Poptr1_1|734833|estExt_Genewise1_v1.C_LG_XVI1389|CDS chrom=LG_XVI strand=+ start=2535936 end=2537535 cdsStart=2535963 cdsEnd=2537314 sfCount=3 sfStarts=2535936,2536764,2537256, sfEnds=2536007,2537133,2537535,	-	-	-
818888	52	71	11.53	23.75	1.04253	Up	6.5e-05	0.000514872	jgi|Poptr1_1|818888|estExt_fgenesh4_pg.C_LG_V1707|CDS chrom=LG_V strand=- start=17806658 end=17808670 cdsStart=17806867 cdsEnd=17808557 sfCount=3 sfStarts=17806658,17807646,17808115, sfEnds=17807120,17807869,17808670,	GO:0005634//nucleus	GO:0003677//DNA binding	GO:0006355//regulation of transcription, DNA-dependent
264694	413	563	91.59	188.29	1.03969	Up	4.41e-13	1.27e-11	jgi|Poptr1_1|264694|gw1.118.182.1|CDS chrom=scaffold_118 strand=+ start=636556 end=638912 cdsStart=636556 cdsEnd=638912 sfCount=2 sfStarts=636556,638571, sfEnds=636774,638912,	GO:0016469//proton-transporting two-sector ATPase complex	GO:0046933//hydrogen ion transporting ATP synthase activity, rotational mechanism;GO:0046961//proton-transporting ATPase activity, rotational mechanism;GO:0003936	GO:0015986//ATP synthesis coupled proton transport
555333	746	1016	165.44	339.79	1.03834	Up	0	0	jgi|Poptr1_1|555333|eugene3.00040046|CDS chrom=LG_IV strand=+ start=455803 end=456366 cdsStart=455803 cdsEnd=456366 sfCount=1 sfStarts=455803, sfEnds=456366,	-	GO:0004857//enzyme inhibitor activity;GO:0030599//pectinesterase activity	-
817547	72	98	15.97	32.78	1.03745	Up	2.96e-06	3.23e-05	jgi|Poptr1_1|817547|estExt_fgenesh4_pg.C_LG_III1440|CDS chrom=LG_III strand=+ start=15400887 end=15403149 cdsStart=15401190 cdsEnd=15401465 sfCount=3 sfStarts=15400887,15401172,15402875, sfEnds=15400951,15401480,15403149,	-	-	-
576061	1376	1872	305.16	626.08	1.03678	Up	3.33e-12	8.3e-11	jgi|Poptr1_1|576061|eugene3.00160196|CDS chrom=LG_XVI strand=+ start=1270270 end=1272194 cdsStart=1270411 cdsEnd=1271764 sfCount=3 sfStarts=1270270,1271391,1271972, sfEnds=1270486,1271949,1272194,	-	GO:0005509//calcium ion binding	-
674027	168	227	37.26	75.92	1.02685	Up	1.88e-12	4.86e-11	jgi|Poptr1_1|674027|grail3.0180000402|CDS chrom=scaffold_180 strand=+ start=195091 end=201743 cdsStart=195277 cdsEnd=201493 sfCount=6 sfStarts=195091,195465,195993,196646,197189,201461, sfEnds=195378,195565,196149,196842,197288,201743,	GO:0016469//proton-transporting two-sector ATPase complex	GO:0046933//hydrogen ion transporting ATP synthase activity, rotational mechanism;GO:0046961//proton-transporting ATPase activity, rotational mechanism;GO:0003936	GO:0015986//ATP synthesis coupled proton transport
274558	85	114	18.85	38.13	1.01636	Up	7.27e-07	9.01e-06	jgi|Poptr1_1|274558|gw1.166.54.1|CDS chrom=scaffold_166 strand=+ start=145698 end=147651 cdsStart=145698 cdsEnd=147651 sfCount=2 sfStarts=145698,147353, sfEnds=145875,147651,	-	-	-
751961	71	95	15.75	31.77	1.01231	Up	6.46e-06	6.51e-05	jgi|Poptr1_1|751961|fgenesh4_pg.C_LG_I001564|CDS chrom=LG_I strand=- start=15986955 end=15989727 cdsStart=15986955 cdsEnd=15989727 sfCount=4 sfStarts=15986955,15987938,15989000,15989615, sfEnds=15987215,15988395,15989256,15989727,	-	GO:0015036//disulfide oxidoreductase activity;GO:0003954//NADH dehydrogenase activity	GO:0006118//electron transport
229995	86	115	19.07	38.46	1.01205	Up	7.12e-07	8.85e-06	jgi|Poptr1_1|229995|gw1.X.4692.1|CDS chrom=LG_X strand=+ start=5598513 end=5600692 cdsStart=5598513 cdsEnd=5600692 sfCount=4 sfStarts=5598513,5599116,5599696,5599895, sfEnds=5598808,5599326,5599806,5600692,	-	GO:0016161//beta-amylase activity	GO:0000272//polysaccharide catabolic process
578604	72	96	15.97	32.11	1.00766	Up	6.32e-06	6.39e-05	jgi|Poptr1_1|578604|eugene3.00180828|CDS chrom=LG_XVIII strand=- start=9590101 end=9594352 cdsStart=9590466 cdsEnd=9593072 sfCount=5 sfStarts=9590101,9590428,9590880,9592968,9594287, sfEnds=9590405,9590535,9590959,9593085,9594352,	-	-	-
732264	55	73	12.2	24.41	1.00059	Up	8.95e-05	0.000688447	jgi|Poptr1_1|732264|estExt_Genewise1_v1.C_LG_XIV3377|CDS chrom=LG_XIV strand=- start=8162658 end=8166679 cdsStart=8162836 cdsEnd=8166673 sfCount=6 sfStarts=8162658,8162692,8164281,8166155,8166364,8166617, sfEnds=8162669,8163045,8164472,8166284,8166506,8166679,	-	GO:0016787//hydrolase activity	-
719293	46	0	10.2	0.01	-9.99435	Down	8.28e-11	1.77e-09	jgi|Poptr1_1|719293|estExt_Genewise1_v1.C_LG_VII2998|CDS chrom=LG_VII strand=- start=9027884 end=9029317 cdsStart=9027974 cdsEnd=9029177 sfCount=3 sfStarts=9027884,9028059,9028629, sfEnds=9027984,9028350,9029317,	-	-	-
645586	40	0	8.87	0.01	-9.79279	Down	1.75e-09	3.19e-08	jgi|Poptr1_1|645586|grail3.0021037202|CDS chrom=LG_II strand=- start=23978892 end=23982628 cdsStart=23978892 cdsEnd=23982628 sfCount=4 sfStarts=23978892,23979833,23980416,23982400, sfEnds=23979208,23979986,23981632,23982628,	-	-	-
760210	39	0	8.65	0.01	-9.75656	Down	2.91e-09	5.2e-08	jgi|Poptr1_1|760210|fgenesh4_pg.C_LG_V000262|CDS chrom=LG_V strand=- start=2107633 end=2118914 cdsStart=2107633 cdsEnd=2118914 sfCount=14 sfStarts=2107633,2109218,2109790,2110281,2110755,2111571,2111785,2113075,2114376,2114594,2114987,2115649,2117679,2118738, sfEnds=2108382,2109559,2109972,2110535,2111487,2111692,2111901,2113542,2114563,2114802,2115315,2116209,2117879,2118914,	-	-	-
562083	37	0	8.21	0.01	-9.68124	Down	8.06e-09	1.36e-07	jgi|Poptr1_1|562083|eugene3.00070021|CDS chrom=LG_VII strand=- start=124188 end=124848 cdsStart=124537 cdsEnd=124848 sfCount=1 sfStarts=124188, sfEnds=124848,	-	-	-
760780	36	0	7.98	0.01	-9.64024	Down	1.34e-08	2.19e-07	jgi|Poptr1_1|760780|fgenesh4_pg.C_LG_V000832|CDS chrom=LG_V strand=+ start=9500944 end=9506049 cdsStart=9500944 cdsEnd=9506049 sfCount=4 sfStarts=9500944,9502830,9503022,9505693, sfEnds=9501947,9502971,9505265,9506049,	GO:0005634//nucleus	GO:0003676//nucleic acid binding;GO:0008270//zinc ion binding	-
756954	35	0	7.76	0.01	-9.59991	Down	2.23e-08	3.45e-07	jgi|Poptr1_1|756954|fgenesh4_pg.C_LG_III000496|CDS chrom=LG_III strand=- start=6504817 end=6509835 cdsStart=6504817 cdsEnd=6509835 sfCount=5 sfStarts=6504817,6505086,6505944,6507491,6509813, sfEnds=6504881,6505169,6507342,6509672,6509835,	-	-	-
780345	35	0	7.76	0.01	-9.59991	Down	2.23e-08	3.44e-07	jgi|Poptr1_1|780345|fgenesh4_pg.C_LG_XIX000484|CDS chrom=LG_XIX strand=- start=6014454 end=6022872 cdsStart=6014454 cdsEnd=6022872 sfCount=12 sfStarts=6014454,6016531,6017650,6017850,6018192,6019077,6020470,6020879,6021089,6021328,6021465,6022834, sfEnds=6015359,6016931,6017771,6018080,6018942,6019589,6020766,6020973,6021174,6021384,6022586,6022872,	-	GO:0003677//DNA binding;GO:0004308//exo-alpha-sialidase activity	GO:0006355//regulation of transcription, DNA-dependent
256051	32	0	7.1	0.01	-9.47168	Down	1.02e-07	1.45e-06	jgi|Poptr1_1|256051|gw1.XVI.1990.1|CDS chrom=LG_XVI strand=+ start=4297347 end=4299866 cdsStart=4297347 cdsEnd=4299866 sfCount=9 sfStarts=4297347,4297614,4297819,4297971,4298158,4298468,4298805,4299255,4299556, sfEnds=4297432,4297728,4297884,4298059,4298245,4298707,4298906,4299408,4299866,	-	-	-
573893	32	0	7.1	0.01	-9.47168	Down	1.02e-07	1.45e-06	jgi|Poptr1_1|573893|eugene3.00190367|CDS chrom=LG_XIX strand=+ start=4804841 end=4806000 cdsStart=4804841 cdsEnd=4805842 sfCount=2 sfStarts=4804841, sfEnds=4806000,	GO:0000151//ubiquitin ligase complex	GO:0004842//ubiquitin-protein ligase activity;GO:0008270//zinc ion binding	GO:0016567//protein ubiquitination
560059	31	0	6.87	0.01	-9.42417	Down	1.7e-07	2.32e-06	jgi|Poptr1_1|560059|eugene3.00060018|CDS chrom=LG_VI strand=- start=148252 end=157381 cdsStart=148531 cdsEnd=157381 sfCount=12 sfStarts=148252,149528,149815,151034,151522,151884,152753,154625,155077,155425,155648,156485, sfEnds=148842,149653,149976,151204,151641,152243,154372,154753,155295,155581,155697,157381,	-	GO:0004339//glucan 1,4-alpha-glucosidase activity	-
773524	30	0	6.65	0.01	-9.37721	Down	2.83e-07	3.76e-06	jgi|Poptr1_1|773524|fgenesh4_pg.C_LG_XII001299|CDS chrom=LG_XII strand=+ start=13974945 end=13977335 cdsStart=13974945 cdsEnd=13977335 sfCount=3 sfStarts=13974945,13976270,13977147, sfEnds=13975538,13976635,13977335,	GO:0016020//membrane	-	-
230571	30	0	6.65	0.01	-9.37721	Down	2.83e-07	3.76e-06	jgi|Poptr1_1|230571|gw1.X.5268.1|CDS chrom=LG_X strand=- start=7192651 end=7195960 cdsStart=7192651 cdsEnd=7195960 sfCount=8 sfStarts=7195682,7195474,7195262,7195026,7194833,7194092,7193579,7192651, sfEnds=7195960,7195568,7195365,7195126,7194936,7194529,7193710,7192804,	-	GO:0003824//catalytic activity	-
574881	29	0	6.43	0.01	-9.32867	Down	4.71e-07	6.05e-06	jgi|Poptr1_1|574881|eugene3.00150276|CDS chrom=LG_XV strand=- start=2504923 end=2506808 cdsStart=2504923 cdsEnd=2506808 sfCount=5 sfStarts=2504923,2505122,2505989,2506570,2506746, sfEnds=2505027,2505251,2506452,2506665,2506808,	-	-	-
195673	29	0	6.43	0.01	-9.32867	Down	4.71e-07	6.05e-06	jgi|Poptr1_1|195673|gw1.IV.762.1|CDS chrom=LG_IV strand=- start=15034783 end=15037163 cdsStart=15034783 cdsEnd=15037163 sfCount=3 sfStarts=15037063,15036346,15034783, sfEnds=15037163,15036438,15035314,	-	GO:0003676//nucleic acid binding	-
804204	29	0	6.43	0.01	-9.32867	Down	4.71e-07	6.04e-06	jgi|Poptr1_1|804204|fgenesh4_pm.C_LG_IX000251|CDS chrom=LG_IX strand=- start=3086051 end=3087583 cdsStart=3086051 cdsEnd=3087583 sfCount=1 sfStarts=3086051, sfEnds=3087583,	-	GO:0008415//acyltransferase activity	GO:0009058//biosynthetic process
216568	29	0	6.43	0.01	-9.32867	Down	4.71e-07	6.04e-06	jgi|Poptr1_1|216568|gw1.VII.873.1|CDS chrom=LG_VII strand=+ start=1270197 end=1282577 cdsStart=1270197 cdsEnd=1282577 sfCount=25 sfStarts=1270197,1271202,1271349,1272053,1272521,1272843,1273264,1273989,1275198,1275674,1276375,1276912,1277248,1277471,1277924,1279011,1279552,1279779,1280048,1280216,1280725,1280870,1281284,1281834,1282461, sfEnds=1270730,1271267,1271492,1272261,1272689,1272953,12733…	-	GO:0004812//aminoacyl-tRNA ligase activity;GO:0005524//ATP binding;GO:0004822//isoleucine-tRNA ligase activity	GO:0006418//tRNA aminoacylation for protein translation;GO:0006428//isoleucyl-tRNA aminoacylation
1087015	29	0	6.43	0.01	-9.32867	Down	4.71e-07	6.03e-06	jgi|Poptr1_1|1087015|estExt_Genewise1Plus.C_LG_IX1930|CDS chrom=LG_IX strand=- start=3557149 end=3566029 cdsStart=3557149 cdsEnd=3565834 sfCount=15 sfStarts=3557149,3558203,3558892,3560096,3561082,3561269,3561422,3561752,3562033,3562452,3562866,3564142,3564389,3564708,3565735, sfEnds=3557370,3558338,3558971,3560571,3561127,3561337,3561566,3561852,3562343,3562832,3562915,3564281,3564605,3565113,35…	-	-	-
793258	28	0	6.21	0.01	-9.27845	Down	7.84e-07	9.69e-06	jgi|Poptr1_1|793258|fgenesh4_pg.C_scaffold_6325000001|CDS chrom=scaffold_6325 strand=- start=43 end=584 cdsStart=43 cdsEnd=584 sfCount=1 sfStarts=43, sfEnds=584,	-	-	-
581849	28	0	6.21	0.01	-9.27845	Down	7.84e-07	9.68e-06	jgi|Poptr1_1|581849|eugene3.01330005|CDS chrom=scaffold_133 strand=- start=40782 end=58503 cdsStart=52772 cdsEnd=58503 sfCount=14 sfStarts=40782,52428,52986,53340,53517,53710,53951,54553,55658,56000,56165,57000,58120,58394, sfEnds=40796,52866,53103,53409,53580,53883,54095,54687,55747,56059,56272,57170,58207,58503,	-	-	-
267835	28	0	6.21	0.01	-9.27845	Down	7.84e-07	9.67e-06	jgi|Poptr1_1|267835|gw1.130.157.1|CDS chrom=scaffold_130 strand=+ start=634090 end=639784 cdsStart=634090 cdsEnd=639784 sfCount=6 sfStarts=634090,635437,636087,636376,636914,639668, sfEnds=635135,635609,636262,636847,639555,639784,	-	-	-
898420	28	0	6.21	0.01	-9.27845	Down	7.84e-07	9.66e-06	jgi|Poptr1_1|898420|e_gw1.XIV.2994.1|CDS chrom=LG_XIV strand=- start=6943395 end=6958967 cdsStart=6943395 cdsEnd=6958967 sfCount=16 sfStarts=6943395,6943946,6944281,6945173,6947461,6947575,6949049,6950131,6954397,6954798,6956017,6956274,6956506,6956892,6957617,6958719, sfEnds=6943477,6944018,6944569,6945326,6947480,6947698,6949349,6950251,6954489,6954893,6956106,6956396,6956765,6957080,6957820,69…	-	-	-
579506	27	0	5.99	0.01	-9.22641	Down	1.3e-06	1.54e-05	jgi|Poptr1_1|579506|eugene3.01070092|CDS chrom=scaffold_107 strand=+ start=917808 end=919319 cdsStart=917808 cdsEnd=919055 sfCount=3 sfStarts=917808,918105,918474, sfEnds=917988,918373,919319,	-	-	-
765816	27	0	5.99	0.01	-9.22641	Down	1.3e-06	1.54e-05	jgi|Poptr1_1|765816|fgenesh4_pg.C_LG_VIII000830|CDS chrom=LG_VIII strand=+ start=5889258 end=5890787 cdsStart=5889258 cdsEnd=5890787 sfCount=1 sfStarts=5889258, sfEnds=5890787,	GO:0005634//nucleus	GO:0003676//nucleic acid binding;GO:0008270//zinc ion binding	-
875527	26	0	5.77	0.01	-9.17243	Down	2.17e-06	2.43e-05	jgi|Poptr1_1|875527|e_gw1.IX.666.1|CDS chrom=LG_IX strand=- start=1108143 end=1115674 cdsStart=1108143 cdsEnd=1115674 sfCount=10 sfStarts=1108143,1109169,1110811,1110962,1111551,1111847,1112319,1113186,1113780,1114875, sfEnds=1109071,1109705,1110839,1111425,1111675,1112135,1112882,1113555,1114487,1115674,	-	-	-
778677	26	0	5.77	0.01	-9.17243	Down	2.17e-06	2.43e-05	jgi|Poptr1_1|778677|fgenesh4_pg.C_LG_XVIII000045|CDS chrom=LG_XVIII strand=- start=676055 end=682706 cdsStart=676055 cdsEnd=682706 sfCount=14 sfStarts=676055,676294,676729,678146,679035,679643,679950,680196,680674,680856,681103,681387,681567,682664, sfEnds=676202,676484,677968,678569,679173,679838,680114,680286,680758,681011,681159,681482,681679,682706,	GO:0005634//nucleus	GO:0003677//DNA binding	GO:0006355//regulation of transcription, DNA-dependent;GO:0009725//response to hormone stimulus;GO:0045449//regulation of transcription
1114306	26	0	5.77	0.01	-9.17243	Down	2.17e-06	2.42e-05	jgi|Poptr1_1|1114306|estExt_Genewise1Plus.C_1210040|CDS chrom=scaffold_121 strand=- start=245249 end=247413 cdsStart=245449 cdsEnd=247413 sfCount=2 sfStarts=245249,246270, sfEnds=246236,247413,	-	-	-
816815	26	0	5.77	0.01	-9.17243	Down	2.17e-06	2.42e-05	jgi|Poptr1_1|816815|estExt_fgenesh4_pg.C_LG_II2110|CDS chrom=LG_II strand=- start=20102533 end=20113503 cdsStart=20102533 cdsEnd=20113476 sfCount=22 sfStarts=20102533,20102709,20104264,20104532,20104813,20106306,20106633,20107030,20107724,20108007,20108374,20108500,20108847,20109110,20109639,20110633,20110893,20111721,20112571,20112977,20113164,20113387, sfEnds=20102678,20102925,20104424,20104671…	GO:0005634//nucleus;GO:0005643//nuclear pore;GO:0005737//cytoplasm	GO:0008565//protein transporter activity	GO:0000059//protein import into nucleus, docking
802561	26	0	5.77	0.01	-9.17243	Down	2.17e-06	2.42e-05	jgi|Poptr1_1|802561|fgenesh4_pm.C_LG_VII000047|CDS chrom=LG_VII strand=+ start=870862 end=873773 cdsStart=870862 cdsEnd=873773 sfCount=7 sfStarts=870862,871033,871307,872211,873132,873380,873546, sfEnds=870921,871131,871410,873019,873254,873468,873773,	-	-	-
814768	26	0	5.77	0.01	-9.17243	Down	2.17e-06	2.42e-05	jgi|Poptr1_1|814768|estExt_fgenesh4_pg.C_LG_I0041|CDS chrom=LG_I strand=+ start=292815 end=295515 cdsStart=292964 cdsEnd=295281 sfCount=5 sfStarts=292815,293625,293908,294253,294966, sfEnds=293076,293839,294107,294761,295515,	GO:0005874//microtubule;GO:0043234//protein complex	GO:0005198//structural molecule activity;GO:0003924//GTPase activity;GO:0005525//GTP binding	GO:0007018//microtubule-based movement;GO:0051258//protein polymerization
421892	26	0	5.77	0.01	-9.17243	Down	2.17e-06	2.41e-05	jgi|Poptr1_1|421892|gw1.II.2526.1|CDS chrom=LG_II strand=+ start=13625056 end=13627140 cdsStart=13625056 cdsEnd=13627140 sfCount=2 sfStarts=13625056,13626164, sfEnds=13625566,13627140,	-	-	-
824625	25	0	5.54	0.01	-9.11374	Down	3.61e-06	3.88e-05	jgi|Poptr1_1|824625|estExt_fgenesh4_pg.C_LG_XV0425|CDS chrom=LG_XV strand=- start=4768216 end=4771870 cdsStart=4768568 cdsEnd=4771870 sfCount=7 sfStarts=4768216,4768864,4769468,4769725,4769955,4770329,4770997, sfEnds=4768777,4768971,4769641,4769853,4770245,4770567,4771870,	GO:0016020//membrane	GO:0008378//galactosyltransferase activity;GO:0000009//alpha-1,6-mannosyltransferase activity;GO:0000026//alpha-1,2-mannosyltransferase activity;GO:0000030//mannosyltransferase activity;GO:0000033//alpha-1,3-mannosyltransferase activity;GO:0003980//UDP-glucose:glycoprotein glucosyltransferase activity;GO:0004376//glycolipid mannosyltransferase activity;GO:0004576//oligosaccharyl transferase activ…	GO:0006486//protein amino acid glycosylation
750490	25	0	5.54	0.01	-9.11374	Down	3.61e-06	3.88e-05	jgi|Poptr1_1|750490|fgenesh4_pg.C_LG_I000093|CDS chrom=LG_I strand=- start=670238 end=671581 cdsStart=670238 cdsEnd=671581 sfCount=3 sfStarts=670238,670925,671429, sfEnds=670558,671311,671581,	GO:0000151//ubiquitin ligase complex;GO:0005634//nucleus	GO:0004842//ubiquitin-protein ligase activity;GO:0008270//zinc ion binding	GO:0016567//protein ubiquitination;GO:0006511//ubiquitin-dependent protein catabolic process;GO:0007275//multicellular organismal development
802970	25	0	5.54	0.01	-9.11374	Down	3.61e-06	3.87e-05	jgi|Poptr1_1|802970|fgenesh4_pm.C_LG_VII000456|CDS chrom=LG_VII strand=+ start=11369083 end=11373148 cdsStart=11369083 cdsEnd=11373148 sfCount=9 sfStarts=11369083,11370416,11370898,11371396,11371782,11371966,11372249,11372640,11372932, sfEnds=11369827,11370822,11371047,11371666,11371892,11372140,11372521,11372834,11373148,	-	GO:0008168//methyltransferase activity;GO:0005554	-
565720	25	0	5.54	0.01	-9.11374	Down	3.61e-06	3.87e-05	jgi|Poptr1_1|565720|eugene3.00100278|CDS chrom=LG_X strand=+ start=3991336 end=3992640 cdsStart=3991336 cdsEnd=3992640 sfCount=1 sfStarts=3991336, sfEnds=3992640,	GO:0016021//integral to membrane	GO:0016758//transferase activity, transferring hexosyl groups	-
580905	24	0	5.32	0.01	-9.05528	Down	6e-06	6.12e-05	jgi|Poptr1_1|580905|eugene3.01240046|CDS chrom=scaffold_124 strand=- start=326256 end=329105 cdsStart=326256 cdsEnd=329105 sfCount=1 sfStarts=326256, sfEnds=329105,	-	-	-
571848	24	0	5.32	0.01	-9.05528	Down	6e-06	6.11e-05	jgi|Poptr1_1|571848|eugene3.00131212|CDS chrom=LG_XIII strand=- start=12208499 end=12209357 cdsStart=12208651 cdsEnd=12209120 sfCount=2 sfStarts=12208499,12209046, sfEnds=12208929,12209357,	-	-	-
204626	24	0	5.32	0.01	-9.05528	Down	6e-06	6.11e-05	jgi|Poptr1_1|204626|gw1.V.27.1|CDS chrom=LG_V strand=- start=11993578 end=12003046 cdsStart=11993578 cdsEnd=12003046 sfCount=13 sfStarts=12002943,12001485,12001266,11999628,11999414,11998901,11998185,11996323,11994756,11994507,11994059,11993779,11993578, sfEnds=12003046,12001630,12001345,11999759,11999530,11998993,11998262,11996379,11995431,11994562,11994119,11993877,11993660,	-	GO:0008270//zinc ion binding	-
785393	24	0	5.32	0.01	-9.05528	Down	6e-06	6.1e-05	jgi|Poptr1_1|785393|fgenesh4_pg.C_scaffold_146000037|CDS chrom=scaffold_146 strand=+ start=449139 end=454169 cdsStart=449139 cdsEnd=454169 sfCount=9 sfStarts=449139,449377,449920,450117,452133,452359,452990,453548,454064, sfEnds=449298,449839,449995,450209,452219,452959,453140,453676,454169,	-	GO:0004197//cysteine-type endopeptidase activity;GO:0004221//ubiquitin thiolesterase activity	GO:0006511//ubiquitin-dependent protein catabolic process
552845	24	0	5.32	0.01	-9.05528	Down	6e-06	6.1e-05	jgi|Poptr1_1|552845|eugene3.00002160|CDS chrom=LG_II strand=- start=20254426 end=20264777 cdsStart=20254426 cdsEnd=20264777 sfCount=16 sfStarts=20254426,20255617,20255974,20257923,20258219,20258465,20258651,20258963,20260644,20260859,20262298,20262448,20263369,20263564,20264373,20264658, sfEnds=20254872,20255850,20256247,20258143,20258359,20258552,20258728,20259015,20260759,20260933,20262360,2026…	-	GO:0003677//DNA binding	GO:0006281//DNA repair
432437	23	0	5.1	0.01	-8.99435	Down	9.98e-06	9.63e-05	jgi|Poptr1_1|432437|gw1.XII.196.1|CDS chrom=LG_XII strand=- start=1824820 end=1833670 cdsStart=1824820 cdsEnd=1833670 sfCount=24 sfStarts=1833043,1832603,1832412,1832097,1831051,1830868,1830697,1830500,1830263,1829991,1829624,1829427,1828891,1828476,1828016,1827764,1827397,1826304,1826110,1825958,1825725,1825424,1825004,1824820, sfEnds=1833670,1832877,1832467,1832322,1831179,1830936,1830765,18305…	-	-	-
596939	23	0	5.1	0.01	-8.99435	Down	9.98e-06	9.62e-05	jgi|Poptr1_1|596939|eugene3.00870015|CDS chrom=scaffold_87 strand=+ start=197696 end=201331 cdsStart=197696 cdsEnd=201331 sfCount=4 sfStarts=197696,198838,199584,200061, sfEnds=197877,199415,199880,201331,	-	-	-
837024	23	0	5.1	0.01	-8.99435	Down	9.98e-06	9.62e-05	jgi|Poptr1_1|837024|estExt_fgenesh4_pm.C_1230028|CDS chrom=scaffold_123 strand=- start=467746 end=471867 cdsStart=468012 cdsEnd=471867 sfCount=7 sfStarts=467746,468394,468529,468721,470341,471051,471417, sfEnds=468074,468448,468625,469465,470699,471185,471867,	GO:0005851//eukaryotic translation initiation factor 2B complex	GO:0003743//translation initiation factor activity;GO:0005525//GTP binding	GO:0006413//translational initiation
873223	23	0	5.1	0.01	-8.99435	Down	9.98e-06	9.61e-05	jgi|Poptr1_1|873223|e_gw1.VIII.463.1|CDS chrom=LG_VIII strand=+ start=6459434 end=6462940 cdsStart=6459434 cdsEnd=6462940 sfCount=9 sfStarts=6459434,6459590,6460044,6460198,6460631,6461256,6461441,6461984,6462551, sfEnds=6459508,6459697,6460106,6460359,6460744,6461318,6461746,6462154,6462940,	-	-	-
550670	23	0	5.1	0.01	-8.99435	Down	9.98e-06	9.6e-05	jgi|Poptr1_1|550670|eugene3.00013111|CDS chrom=LG_I strand=- start=35386318 end=35389497 cdsStart=35386318 cdsEnd=35389497 sfCount=3 sfStarts=35386318,35386420,35388492, sfEnds=35386353,35387027,35389497,	-	-	-
573768	23	0	5.1	0.01	-8.99435	Down	9.98e-06	9.59e-05	jgi|Poptr1_1|573768|eugene3.00190242|CDS chrom=LG_XIX strand=- start=2807442 end=2815726 cdsStart=2808087 cdsEnd=2815726 sfCount=23 sfStarts=2807442,2808043,2808891,2809171,2809387,2809643,2810496,2810760,2811048,2811991,2812747,2812964,2813157,2813419,2813691,2813904,2814062,2814255,2814386,2814907,2815121,2815347,2815604, sfEnds=2807749,2808129,2808969,2809303,2809566,2809837,2810678,2810856,28…	-	-	-
828302	23	0	5.1	0.01	-8.99435	Down	9.98e-06	9.59e-05	jgi|Poptr1_1|828302|estExt_fgenesh4_pg.C_1480042|CDS chrom=scaffold_148 strand=- start=393647 end=411635 cdsStart=394001 cdsEnd=411635 sfCount=42 sfStarts=393647,394354,394923,395113,395976,396149,396291,396912,397100,397301,398125,398392,398669,398877,399117,399847,400270,400482,400662,400890,401125,401302,401492,402642,402778,402942,404713,404873,405032,406206,406432,407632,407809,409067,409429…	GO:0000148//1,3-beta-glucan synthase complex;GO:0016020//membrane	GO:0003676//nucleic acid binding;GO:0003843//1,3-beta-glucan synthase activity	GO:0006075//1,3-beta-glucan biosynthetic process
883382	23	0	5.1	0.01	-8.99435	Down	9.98e-06	9.58e-05	jgi|Poptr1_1|883382|e_gw1.X.1465.1|CDS chrom=LG_X strand=- start=16186463 end=16194414 cdsStart=16186463 cdsEnd=16194414 sfCount=13 sfStarts=16186463,16187532,16188339,16189101,16189747,16190020,16190208,16191179,16191292,16191699,16192969,16193541,16194276, sfEnds=16186586,16187623,16188419,16189177,16189827,16190122,16190297,16191217,16191384,16191905,16193201,16193675,16194414,	-	-	-
757043	23	0	5.1	0.01	-8.99435	Down	9.98e-06	9.57e-05	jgi|Poptr1_1|757043|fgenesh4_pg.C_LG_III000585|CDS chrom=LG_III strand=- start=7342008 end=7345424 cdsStart=7342008 cdsEnd=7345422 sfCount=7 sfStarts=7342008,7343592,7344029,7344241,7344688,7344863,7345260, sfEnds=7342679,7343661,7344148,7344484,7344729,7345165,7345424,	-	-	-
757230	22	0	4.88	0.01	-8.93074	Down	1.66e-05	0.000152148	jgi|Poptr1_1|757230|fgenesh4_pg.C_LG_III000772|CDS chrom=LG_III strand=+ start=9770026 end=9778083 cdsStart=9770026 cdsEnd=9778083 sfCount=14 sfStarts=9770026,9770888,9771933,9772186,9772915,9773605,9773810,9774386,9774665,9775079,9776468,9777111,9777398,9778015, sfEnds=9770409,9771006,9772018,9772538,9772992,9773673,9773889,9774566,9774996,9775185,9776622,9777301,9777611,9778083,	-	-	-
429483	22	0	4.88	0.01	-8.93074	Down	1.66e-05	0.000152033	jgi|Poptr1_1|429483|gw1.VIII.210.1|CDS chrom=LG_VIII strand=- start=11387820 end=11391643 cdsStart=11387820 cdsEnd=11391643 sfCount=7 sfStarts=11390981,11390164,11389955,11389756,11388418,11388126,11387820, sfEnds=11391643,11390319,11390062,11389866,11389663,11388336,11388069,	-	-	-
761155	22	0	4.88	0.01	-8.93074	Down	1.66e-05	0.000151917	jgi|Poptr1_1|761155|fgenesh4_pg.C_LG_V001207|CDS chrom=LG_V strand=+ start=14016270 end=14024222 cdsStart=14016270 cdsEnd=14024222 sfCount=15 sfStarts=14016270,14017139,14017642,14018286,14018485,14019828,14020036,14020253,14020491,14020817,14021773,14023142,14023504,14023871,14024058, sfEnds=14017055,14017429,14017781,14018391,14018577,14019917,14020149,14020360,14020564,14020871,14021954,140232…	GO:0005737//cytoplasm	-	GO:0006886//intracellular protein transport
854348	22	0	4.88	0.01	-8.93074	Down	1.66e-05	0.000151802	jgi|Poptr1_1|854348|e_gw1.III.350.1|CDS chrom=LG_III strand=+ start=14591510 end=14593743 cdsStart=14591510 cdsEnd=14593743 sfCount=2 sfStarts=14591510,14593471, sfEnds=14592181,14593743,	-	-	-
809614	22	0	4.88	0.01	-8.93074	Down	1.66e-05	0.000151687	jgi|Poptr1_1|809614|fgenesh4_pm.C_LG_XIX000179|CDS chrom=LG_XIX strand=- start=7846597 end=7857886 cdsStart=7846597 cdsEnd=7857886 sfCount=21 sfStarts=7846597,7848368,7848887,7849613,7850854,7851007,7851305,7851547,7851832,7852050,7852259,7852532,7852736,7854134,7854367,7855501,7856112,7856345,7856930,7857559,7857755, sfEnds=7846874,7848607,7848996,7849683,7850923,7851106,7851380,7851621,7851885,…	-	GO:0004672//protein kinase activity;GO:0005524//ATP binding;GO:0004674//protein serine/threonine kinase activity	GO:0006468//protein amino acid phosphorylation
819452	22	0	4.88	0.01	-8.93074	Down	1.66e-05	0.000151572	jgi|Poptr1_1|819452|estExt_fgenesh4_pg.C_LG_VI1472|CDS chrom=LG_VI strand=- start=14666410 end=14670617 cdsStart=14666773 cdsEnd=14670515 sfCount=5 sfStarts=14666410,14667765,14669425,14670217,14670487, sfEnds=14666916,14667920,14669500,14670378,14670617,	-	-	-
281791	22	0	4.88	0.01	-8.93074	Down	1.66e-05	0.000151457	jgi|Poptr1_1|281791|gw1.28.365.1|CDS chrom=scaffold_28 strand=+ start=1252390 end=1254598 cdsStart=1252390 cdsEnd=1254598 sfCount=8 sfStarts=1252390,1252542,1252692,1253337,1253522,1253707,1253968,1254527, sfEnds=1252439,1252602,1252778,1253435,1253624,1253786,1254075,1254598,	GO:0005737//cytoplasm	GO:0004364//glutathione transferase activity	GO:0008152//metabolic process
1097644	22	0	4.88	0.01	-8.93074	Down	1.66e-05	0.000151343	jgi|Poptr1_1|1097644|estExt_Genewise1Plus.C_LG_XIII3289|CDS chrom=LG_XIII strand=+ start=12426442 end=12432669 cdsStart=12426442 cdsEnd=12432428 sfCount=10 sfStarts=12426442,12428479,12428807,12429165,12429494,12429696,12430427,12431049,12431465,12432359, sfEnds=12426741,12428664,12428899,12429347,12429596,12429881,12430631,12431346,12431886,12432669,	-	-	-
551416	22	0	4.88	0.01	-8.93074	Down	1.66e-05	0.000151228	jgi|Poptr1_1|551416|eugene3.00020731|CDS chrom=LG_II strand=+ start=5446731 end=5450600 cdsStart=5446731 cdsEnd=5450600 sfCount=2 sfStarts=5446731,5450371, sfEnds=5450205,5450600,	-	-	-
577181	22	0	4.88	0.01	-8.93074	Down	1.66e-05	0.000151114	jgi|Poptr1_1|577181|eugene3.00161316|CDS chrom=LG_XVI strand=+ start=13119399 end=13120269 cdsStart=13119399 cdsEnd=13119951 sfCount=2 sfStarts=13119399,13119505, sfEnds=13119425,13120269,	-	-	-
1122708	22	0	4.88	0.01	-8.93074	Down	1.66e-05	0.000151	jgi|Poptr1_1|1122708|MOL_MOL_gw1.I.5056.1|CDS chrom=LG_I strand=- start=31291802 end=31298721 cdsStart=31292069 cdsEnd=31298721 sfCount=12 sfStarts=31291802,31293144,31293679,31293946,31295227,31295455,31295589,31297015,31297266,31297830,31298417,31298611, sfEnds=31293058,31293267,31293862,31294038,31295275,31295496,31295741,31297146,31297358,31297973,31298491,31298721,	-	-	-
550855	21	0	4.66	0.01	-8.86419	Down	2.76e-05	0.000239731	jgi|Poptr1_1|550855|eugene3.00020170|CDS chrom=LG_II strand=+ start=1104763 end=1106511 cdsStart=1105338 cdsEnd=1106511 sfCount=3 sfStarts=1104763,1105594,1105997, sfEnds=1105376,1105894,1106511,	-	-	-
902207	21	0	4.66	0.01	-8.86419	Down	2.76e-05	0.000239558	jgi|Poptr1_1|902207|e_gw1.XV.1236.1|CDS chrom=LG_XV strand=+ start=4720241 end=4723771 cdsStart=4720241 cdsEnd=4723771 sfCount=3 sfStarts=4720241,4722593,4723062, sfEnds=4720708,4723007,4723771,	-	-	-
639865	21	0	4.66	0.01	-8.86419	Down	2.76e-05	0.000239386	jgi|Poptr1_1|639865|grail3.0100011301|CDS chrom=LG_I strand=+ start=2265175 end=2266162 cdsStart=2265175 cdsEnd=2265938 sfCount=2 sfStarts=2265175,2265922, sfEnds=2265562,2266162,	-	-	-
666645	21	0	4.66	0.01	-8.86419	Down	2.76e-05	0.000239214	jgi|Poptr1_1|666645|grail3.0005026601|CDS chrom=LG_XV strand=- start=7040252 end=7047637 cdsStart=7040458 cdsEnd=7044979 sfCount=15 sfStarts=7040252,7040661,7041209,7041370,7041662,7041944,7042113,7042376,7042713,7042878,7043066,7044792,7044971,7045893,7047531, sfEnds=7040571,7040765,7041268,7041508,7041846,7042027,7042235,7042555,7042782,7042983,7043141,7044881,7045072,7045964,7047637,	-	GO:0000166//nucleotide binding;GO:0017111//nucleoside-triphosphatase activity;GO:0005524//ATP binding;GO:0004003//ATP-dependent DNA helicase activity;GO:0004004//ATP-dependent RNA helicase activity;GO:0008026//ATP-dependent helicase activity;GO:0008094//DNA-dependent ATPase activity;GO:0008186//RNA-dependent ATPase activity;GO:0015462//protein-transmembrane transporting ATPase activity;GO:0015616…	-
797252	21	0	4.66	0.01	-8.86419	Down	2.76e-05	0.000239042	jgi|Poptr1_1|797252|fgenesh4_pm.C_LG_I000255|CDS chrom=LG_I strand=+ start=5757159 end=5766223 cdsStart=5757159 cdsEnd=5766223 sfCount=12 sfStarts=5757159,5758773,5759076,5759268,5759562,5763424,5763961,5764468,5764680,5765068,5765838,5766047, sfEnds=5758517,5758931,5759156,5759399,5759689,5763511,5764055,5764531,5764855,5765289,5765922,5766223,	-	-	-
804102	21	0	4.66	0.01	-8.86419	Down	2.76e-05	0.00023887	jgi|Poptr1_1|804102|fgenesh4_pm.C_LG_IX000149|CDS chrom=LG_IX strand=- start=1861784 end=1871708 cdsStart=1861784 cdsEnd=1871708 sfCount=29 sfStarts=1861784,1862401,1862547,1862700,1862833,1863036,1863536,1863692,1864451,1864945,1865608,1865938,1866180,1866388,1866542,1866842,1867439,1868141,1868405,1868594,1868717,1868864,1869822,1870127,1870462,1870644,1870825,1871153,1871526, sfEnds=1861867,18…	GO:0005634//nucleus;GO:0005643//nuclear pore;GO:0005737//cytoplasm	GO:0008565//protein transporter activity	GO:0000059//protein import into nucleus, docking
208346	21	0	4.66	0.01	-8.86419	Down	2.76e-05	0.000238699	jgi|Poptr1_1|208346|gw1.V.3747.1|CDS chrom=LG_V strand=- start=4008809 end=4012099 cdsStart=4008809 cdsEnd=4012099 sfCount=6 sfStarts=4012061,4010845,4010656,4010438,4009231,4008809, sfEnds=4012099,4010961,4010759,4010575,4009318,4008910,	-	-	-
711954	21	0	4.66	0.01	-8.86419	Down	2.76e-05	0.000238528	jgi|Poptr1_1|711954|estExt_Genewise1_v1.C_LG_III0799|CDS chrom=LG_III strand=+ start=15748141 end=15757519 cdsStart=15748141 cdsEnd=15757194 sfCount=18 sfStarts=15748141,15748894,15749142,15749310,15749476,15749702,15749958,15750149,15750806,15750957,15751099,15752700,15753094,15753981,15754210,15754868,15755135,15756933, sfEnds=15748221,15749004,15749198,15749386,15749554,15749775,15750058,15750…	-	GO:0005351//sugar:hydrogen symporter activity	GO:0009401//phosphoenolpyruvate-dependent sugar phosphotransferase system
654326	20	0	4.44	0.01	-8.79442	Down	4.59e-05	0.000380598	jgi|Poptr1_1|654326|grail3.0058002101|CDS chrom=LG_VII strand=- start=145606 end=147819 cdsStart=145606 cdsEnd=147083 sfCount=6 sfStarts=145606,145982,146386,146641,146981,147767, sfEnds=145932,146065,146470,146752,147508,147819,	-	GO:0004437//inositol or phosphatidylinositol phosphatase activity	-
815476	20	0	4.44	0.01	-8.79442	Down	4.59e-05	0.000380337	jgi|Poptr1_1|815476|estExt_fgenesh4_pg.C_LG_I2067|CDS chrom=LG_I strand=+ start=20786788 end=20790053 cdsStart=20786788 cdsEnd=20790053 sfCount=7 sfStarts=20786788,20787277,20787766,20788194,20788406,20788628,20789070, sfEnds=20786939,20787523,20787828,20788286,20788498,20788720,20790053,	GO:0005634//nucleus	GO:0003676//nucleic acid binding;GO:0008270//zinc ion binding	-
775989	20	0	4.44	0.01	-8.79442	Down	4.59e-05	0.000380075	jgi|Poptr1_1|775989|fgenesh4_pg.C_LG_XV000417|CDS chrom=LG_XV strand=+ start=4665625 end=4668339 cdsStart=4665625 cdsEnd=4668339 sfCount=3 sfStarts=4665625,4666017,4666584, sfEnds=4665881,4666508,4668339,	-	GO:0003684//damaged DNA binding;GO:0005524//ATP binding	GO:0006298//mismatch repair
550521	20	0	4.44	0.01	-8.79442	Down	4.59e-05	0.000379815	jgi|Poptr1_1|550521|eugene3.00012962|CDS chrom=LG_I strand=- start=34156967 end=34171496 cdsStart=34156967 cdsEnd=34171496 sfCount=23 sfStarts=34156967,34157997,34158495,34158678,34158863,34159184,34159633,34160125,34160518,34160772,34161706,34161874,34162556,34164504,34164727,34165544,34166053,34166593,34166783,34167726,34167976,34169004,34170341, sfEnds=34157661,34158066,34158599,34158788,34158…	-	GO:0004182;GO:0005351//sugar:hydrogen symporter activity	GO:0006508//proteolysis;GO:0009401//phosphoenolpyruvate-dependent sugar phosphotransferase system
560432	20	0	4.44	0.01	-8.79442	Down	4.59e-05	0.000379554	jgi|Poptr1_1|560432|eugene3.00060391|CDS chrom=LG_VI strand=- start=2863236 end=2866985 cdsStart=2863236 cdsEnd=2866985 sfCount=3 sfStarts=2863236,2864578,2865567, sfEnds=2864243,2864721,2866985,	-	GO:0003824//catalytic activity;GO:0045735//nutrient reservoir activity	-
576915	20	0	4.44	0.01	-8.79442	Down	4.59e-05	0.000379294	jgi|Poptr1_1|576915|eugene3.00161050|CDS chrom=LG_XVI strand=+ start=10241544 end=10246824 cdsStart=10241544 cdsEnd=10246039 sfCount=11 sfStarts=10241544,10241985,10242668,10242910,10243210,10243408,10244229,10244373,10244749,10244903,10246452, sfEnds=10241876,10242059,10242775,10243070,10243324,10243562,10244280,10244441,10244826,10246040,10246824,	GO:0009317//acetyl-CoA carboxylase complex	GO:0003989//acetyl-CoA carboxylase activity	GO:0006633//fatty acid biosynthetic process
830131	20	0	4.44	0.01	-8.79442	Down	4.59e-05	0.000379034	jgi|Poptr1_1|830131|estExt_fgenesh4_pm.C_LG_II0282|CDS chrom=LG_II strand=+ start=4057667 end=4064862 cdsStart=4057923 cdsEnd=4064340 sfCount=10 sfStarts=4057667,4059390,4060809,4061037,4061591,4061960,4062287,4062621,4063625,4063886, sfEnds=4057946,4059798,4060936,4061096,4061740,4062115,4062498,4062722,4063794,4064862,	-	GO:0004672//protein kinase activity;GO:0005524//ATP binding;GO:0004713//protein tyrosine kinase activity;GO:0004674//protein serine/threonine kinase activity;GO:0004707//MAP kinase activity;GO:0004675//transmembrane receptor protein serine/threonine kinase activity;GO:0004676//3-phosphoinositide-dependent protein kinase activity;GO:0004677//DNA-dependent protein kinase activity;GO:0004679//AMP-ac…	GO:0006468//protein amino acid phosphorylation
809657	20	0	4.44	0.01	-8.79442	Down	4.59e-05	0.000378775	jgi|Poptr1_1|809657|fgenesh4_pm.C_LG_XIX000222|CDS chrom=LG_XIX strand=+ start=9304991 end=9308174 cdsStart=9304991 cdsEnd=9308174 sfCount=3 sfStarts=9304991,9307298,9307608, sfEnds=9305479,9307471,9308174,	-	GO:0000009//alpha-1,6-mannosyltransferase activity;GO:0000026//alpha-1,2-mannosyltransferase activity;GO:0000030//mannosyltransferase activity;GO:0000033//alpha-1,3-mannosyltransferase activity;GO:0003980//UDP-glucose:glycoprotein glucosyltransferase activity;GO:0004376//glycolipid mannosyltransferase activity;GO:0004576//oligosaccharyl transferase activity;GO:0004583//dolichyl-phosphate-glucose-…	-
562361	20	0	4.44	0.01	-8.79442	Down	4.59e-05	0.000378516	jgi|Poptr1_1|562361|eugene3.00070299|CDS chrom=LG_VII strand=- start=1836136 end=1837980 cdsStart=1836136 cdsEnd=1837980 sfCount=6 sfStarts=1836136,1836202,1836427,1836826,1837040,1837657, sfEnds=1836150,1836307,1836549,1836965,1837135,1837980,	GO:0005634//nucleus	GO:0003700//transcription factor activity	GO:0006355//regulation of transcription, DNA-dependent
564289	20	0	4.44	0.01	-8.79442	Down	4.59e-05	0.000378257	jgi|Poptr1_1|564289|eugene3.00080884|CDS chrom=LG_VIII strand=+ start=5906745 end=5912416 cdsStart=5906745 cdsEnd=5911285 sfCount=9 sfStarts=5906745,5907393,5907736,5908672,5909140,5909459,5910399,5911136,5912077, sfEnds=5907256,5907528,5907976,5908897,5909330,5909762,5910531,5911339,5912416,	-	GO:0008757//S-adenosylmethionine-dependent methyltransferase activity;GO:0008168//methyltransferase activity;GO:0005554	-
567274	20	0	4.44	0.01	-8.79442	Down	4.59e-05	0.000377999	jgi|Poptr1_1|567274|eugene3.00101832|CDS chrom=LG_X strand=- start=16892919 end=16896126 cdsStart=16893221 cdsEnd=16895800 sfCount=7 sfStarts=16892919,16893475,16894818,16895364,16895584,16895756,16896004, sfEnds=16893330,16893611,16894910,16895464,16895652,16895886,16896126,	-	-	-
898304	20	0	4.44	0.01	-8.79442	Down	4.59e-05	0.000377741	jgi|Poptr1_1|898304|e_gw1.XIV.299.1|CDS chrom=LG_XIV strand=- start=13813666 end=13822294 cdsStart=13813666 cdsEnd=13822294 sfCount=14 sfStarts=13813666,13814354,13816336,13818641,13818808,13818934,13819064,13820565,13820740,13820917,13821348,13821786,13822060,13822157, sfEnds=13813740,13814892,13816767,13818729,13818851,13818985,13819190,13820658,13820833,13821062,13821566,13821916,13822087,1382…	-	-	-
578707	20	0	4.44	0.01	-8.79442	Down	4.59e-05	0.000377483	jgi|Poptr1_1|578707|eugene3.00180931|CDS chrom=LG_XVIII strand=- start=10483136 end=10489018 cdsStart=10483136 cdsEnd=10489018 sfCount=5 sfStarts=10483136,10483967,10484640,10485274,10488075, sfEnds=10483552,10484168,10484860,10486951,10489018,	-	-	-
765880	20	0	4.44	0.01	-8.79442	Down	4.59e-05	0.000377226	jgi|Poptr1_1|765880|fgenesh4_pg.C_LG_VIII000894|CDS chrom=LG_VIII strand=- start=6332327 end=6336946 cdsStart=6332327 cdsEnd=6336946 sfCount=9 sfStarts=6332327,6332716,6333279,6333936,6334906,6335173,6335798,6336211,6336761, sfEnds=6332520,6333075,6333360,6334796,6335011,6335327,6335950,6336504,6336946,	-	GO:0003676//nucleic acid binding	-
759926	20	0	4.44	0.01	-8.79442	Down	4.59e-05	0.000376969	jgi|Poptr1_1|759926|fgenesh4_pg.C_LG_IV001554|CDS chrom=LG_IV strand=- start=16458835 end=16462833 cdsStart=16458835 cdsEnd=16462833 sfCount=10 sfStarts=16458835,16459603,16460025,16460325,16461239,16461505,16461736,16462192,16462392,16462636, sfEnds=16459270,16459934,16460127,16460506,16461422,16461593,16461812,16462282,16462457,16462833,	-	-	-
735714	20	0	4.44	0.01	-8.79442	Down	4.59e-05	0.000376712	jgi|Poptr1_1|735714|estExt_Genewise1_v1.C_LG_XVI3456|CDS chrom=LG_XVI strand=+ start=10255548 end=10263258 cdsStart=10255548 cdsEnd=10263258 sfCount=11 sfStarts=10255548,10256840,10258398,10258903,10259079,10259669,10259891,10261308,10261822,10262816,10263097, sfEnds=10255676,10256978,10258549,10258986,10259141,10259800,10260097,10261427,10261871,10262978,10263258,	-	GO:0008138//protein tyrosine/serine/threonine phosphatase activity;GO:0004721//phosphoprotein phosphatase activity;GO:0004484//mRNA guanylyltransferase activity	GO:0006470//protein amino acid dephosphorylation;GO:0006370//mRNA capping;GO:0006397//mRNA processing
648122	20	0	4.44	0.01	-8.79442	Down	4.59e-05	0.000376456	jgi|Poptr1_1|648122|grail3.0038009201|CDS chrom=LG_IV strand=- start=6725804 end=6726966 cdsStart=6725814 cdsEnd=6726871 sfCount=3 sfStarts=6725804,6726524,6726742, sfEnds=6726291,6726653,6726966,	-	-	-
833847	19	0	4.21	0.01	-8.71768	Down	7.63e-05	0.000597628	jgi|Poptr1_1|833847|estExt_fgenesh4_pm.C_LG_X0870|CDS chrom=LG_X strand=- start=18786725 end=18792113 cdsStart=18787046 cdsEnd=18792113 sfCount=8 sfStarts=18786725,18787916,18789040,18789203,18789742,18790048,18790913,18791991, sfEnds=18787366,18788149,18789118,18789318,18789886,18790465,18791873,18792113,	GO:0016020//membrane;GO:0005743//mitochondrial inner membrane	GO:0005488//binding;GO:0005509//calcium ion binding	GO:0006810//transport
722874	19	0	4.21	0.01	-8.71768	Down	7.63e-05	0.000597241	jgi|Poptr1_1|722874|estExt_Genewise1_v1.C_LG_IX3421|CDS chrom=LG_IX strand=+ start=6925567 end=6927832 cdsStart=6925627 cdsEnd=6927588 sfCount=5 sfStarts=6925567,6925730,6926415,6927236,6927513, sfEnds=6925630,6925802,6926748,6927408,6927832,	GO:0005622//intracellular	-	-
1097911	19	0	4.21	0.01	-8.71768	Down	7.63e-05	0.000596853	jgi|Poptr1_1|1097911|estExt_Genewise1Plus.C_LG_XIV0229|CDS chrom=LG_XIV strand=- start=790314 end=796387 cdsStart=790314 cdsEnd=796387 sfCount=15 sfStarts=790314,790601,790958,791245,791491,791619,791799,792045,792250,793868,794024,794861,795071,796169,796349, sfEnds=790483,790871,791023,791385,791547,791674,791934,792132,792374,793969,794628,794975,795621,796274,796387,	-	-	-
564123	19	0	4.21	0.01	-8.71768	Down	7.63e-05	0.000596466	jgi|Poptr1_1|564123|eugene3.00080718|CDS chrom=LG_VIII strand=+ start=4813753 end=4821787 cdsStart=4813753 cdsEnd=4821787 sfCount=14 sfStarts=4813753,4814204,4814694,4814971,4815945,4816786,4817299,4818444,4818619,4818865,4819516,4820031,4820713,4821664, sfEnds=4813813,4814314,4814828,4815407,4816124,4816995,4817391,4818533,4818721,4818945,4819592,4820111,4820804,4821787,	-	GO:0003676//nucleic acid binding	-
678076	18	0	3.99	0.01	-8.64024	Down	0.000126929	0.000936739	jgi|Poptr1_1|678076|grail3.0041003802|CDS chrom=scaffold_41 strand=+ start=544525 end=547201 cdsStart=544525 cdsEnd=547201 sfCount=3 sfStarts=544525,546243,546857, sfEnds=546162,546509,547201,	-	GO:0016308//1-phosphatidylinositol-4-phosphate 5-kinase activity	-
672855	18	0	3.99	0.01	-8.64024	Down	0.000126929	0.000936166	jgi|Poptr1_1|672855|grail3.0150004601|CDS chrom=scaffold_150 strand=+ start=474457 end=476636 cdsStart=474782 cdsEnd=476636 sfCount=4 sfStarts=474457,474680,475149,475947, sfEnds=474527,474866,475315,476636,	-	-	-
573940	18	0	3.99	0.01	-8.64024	Down	0.000126929	0.000935594	jgi|Poptr1_1|573940|eugene3.00190414|CDS chrom=LG_XIX strand=+ start=5317081 end=5323440 cdsStart=5317081 cdsEnd=5323440 sfCount=10 sfStarts=5317081,5317339,5318836,5318987,5319178,5320041,5320350,5320702,5321555,5322984, sfEnds=5317242,5317432,5318906,5319075,5319421,5320153,5320395,5320830,5322108,5323440,	-	-	-
805928	18	0	3.99	0.01	-8.64024	Down	0.000126929	0.000935023	jgi|Poptr1_1|805928|fgenesh4_pm.C_LG_XI000203|CDS chrom=LG_XI strand=+ start=8557344 end=8560987 cdsStart=8557344 cdsEnd=8560987 sfCount=6 sfStarts=8557344,8557515,8559082,8560617,8560790,8560951, sfEnds=8557434,8557780,8559197,8560690,8560853,8560987,	GO:0016021//integral to membrane	GO:0004872//receptor activity	GO:0015031//protein transport
1070544	18	0	3.99	0.01	-8.64024	Down	0.000126929	0.000934452	jgi|Poptr1_1|1070544|estExt_Genewise1Plus.C_LG_I9364|CDS chrom=LG_I strand=+ start=34224781 end=34231252 cdsStart=34224781 cdsEnd=34230992 sfCount=11 sfStarts=34224781,34225371,34225836,34226794,34228307,34229344,34229546,34229865,34230020,34230604,34230891, sfEnds=34225265,34225410,34225888,34226839,34228420,34229451,34229640,34229931,34230070,34230696,34231252,	-	-	-
761357	18	0	3.99	0.01	-8.64024	Down	0.000126929	0.000933882	jgi|Poptr1_1|761357|fgenesh4_pg.C_LG_V001409|CDS chrom=LG_V strand=- start=15731897 end=15737057 cdsStart=15731897 cdsEnd=15737057 sfCount=8 sfStarts=15731897,15732870,15733002,15733649,15734423,15735542,15736086,15736968, sfEnds=15732565,15732953,15733340,15734258,15735296,15735941,15736640,15737057,	-	-	-
821679	18	0	3.99	0.01	-8.64024	Down	0.000126929	0.000933312	jgi|Poptr1_1|821679|estExt_fgenesh4_pg.C_LG_X0020|CDS chrom=LG_X strand=+ start=183843 end=189715 cdsStart=184371 cdsEnd=189402 sfCount=10 sfStarts=183843,184252,184916,185772,185909,186795,186955,188144,188513,189226, sfEnds=184108,184460,185023,185803,185959,186856,187216,188409,188604,189715,	-	-	-
591810	18	0	3.99	0.01	-8.64024	Down	0.000126929	0.000932743	jgi|Poptr1_1|591810|eugene3.00400155|CDS chrom=scaffold_40 strand=+ start=1136175 end=1138072 cdsStart=1136380 cdsEnd=1138072 sfCount=2 sfStarts=1136175,1136973, sfEnds=1136386,1138072,	-	-	-
839996	18	0	3.99	0.01	-8.64024	Down	0.000126929	0.000932175	jgi|Poptr1_1|839996|e_gw1.I.6600.1|CDS chrom=LG_I strand=+ start=643884 end=649578 cdsStart=643884 cdsEnd=649578 sfCount=16 sfStarts=643884,644634,644854,645022,645168,645546,645755,645934,646090,646374,646673,647323,647681,648014,648834,649519, sfEnds=643967,644762,644927,645091,645223,645617,645849,646000,646219,646592,646815,647497,647771,648171,649022,649578,	-	-	-
591791	18	0	3.99	0.01	-8.64024	Down	0.000126929	0.000931608	jgi|Poptr1_1|591791|eugene3.00400136|CDS chrom=scaffold_40 strand=- start=1036437 end=1044645 cdsStart=1036755 cdsEnd=1044645 sfCount=12 sfStarts=1036437,1037068,1037781,1038098,1038503,1039211,1040767,1041752,1042453,1042719,1042886,1043296, sfEnds=1036931,1037152,1038002,1038273,1038566,1039305,1040854,1041879,1042584,1042799,1043044,1044645,	-	-	-
1075117	18	0	3.99	0.01	-8.64024	Down	0.000126929	0.000931041	jgi|Poptr1_1|1075117|estExt_Genewise1Plus.C_LG_IV0812|CDS chrom=LG_IV strand=+ start=2435054 end=2444386 cdsStart=2435054 cdsEnd=2443680 sfCount=18 sfStarts=2435054,2436377,2437153,2437532,2437850,2438075,2438341,2438687,2439351,2439736,2439992,2440759,2441402,2441687,2442904,2443089,2443574,2443814, sfEnds=2435368,2436853,2437369,2437689,2437920,2438180,2438436,2439262,2439421,2439853,2440045,24…	-	-	-
195587	18	0	3.99	0.01	-8.64024	Down	0.000126929	0.000930475	jgi|Poptr1_1|195587|gw1.IV.676.1|CDS chrom=LG_IV strand=+ start=14808048 end=14810317 cdsStart=14808048 cdsEnd=14810317 sfCount=2 sfStarts=14808048,14808571, sfEnds=14808190,14810317,	-	GO:0003677//DNA binding;GO:0005524//ATP binding;GO:0008026//ATP-dependent helicase activity;GO:0003676//nucleic acid binding;GO:0004386//helicase activity;GO:0004003//ATP-dependent DNA helicase activity;GO:0004004//ATP-dependent RNA helicase activity;GO:0008094//DNA-dependent ATPase activity;GO:0008186//RNA-dependent ATPase activity;GO:0015462//protein-transmembrane transporting ATPase activity;G…	-
1081848	18	0	3.99	0.01	-8.64024	Down	0.000126929	0.00092991	jgi|Poptr1_1|1081848|estExt_Genewise1Plus.C_LG_VII0257|CDS chrom=LG_VII strand=+ start=514221 end=519959 cdsStart=514221 cdsEnd=519959 sfCount=14 sfStarts=514221,514999,515289,515584,516096,516689,516837,517315,517592,517751,518593,519056,519649,519858, sfEnds=514367,515071,515416,515699,516156,516755,516914,517472,517651,517844,518760,519384,519765,519959,	-	-	-
837209	18	0	3.99	0.01	-8.64024	Down	0.000126929	0.000929345	jgi|Poptr1_1|837209|estExt_fgenesh4_pm.C_1370004|CDS chrom=scaffold_137 strand=+ start=118329 end=123182 cdsStart=118329 cdsEnd=122779 sfCount=9 sfStarts=118329,119066,120483,120839,121238,121446,121848,122163,122588, sfEnds=118686,120286,120665,121122,121354,121708,122019,122435,123182,	GO:0016020//membrane	GO:0005215//transporter activity	GO:0006810//transport
1089730	78	2	17.3	0.67	-4.69047	Down	3.77e-15	1.36e-13	jgi|Poptr1_1|1089730|estExt_Genewise1Plus.C_LG_X1415|CDS chrom=LG_X strand=- start=6231813 end=6234470 cdsStart=6231975 cdsEnd=6234470 sfCount=2 sfStarts=6231813,6233595, sfEnds=6232448,6234470,	-	-	-
241081	51	2	11.31	0.67	-4.07729	Down	1.57e-09	2.88e-08	jgi|Poptr1_1|241081|gw1.XIII.1330.1|CDS chrom=LG_XIII strand=- start=2293502 end=2319052 cdsStart=2293502 cdsEnd=2319052 sfCount=43 sfStarts=2318948,2318012,2316716,2315400,2315086,2314671,2314099,2313887,2313268,2312502,2312332,2311894,2309442,2308291,2308057,2307912,2307649,2307124,2306907,2306771,2305657,2304846,2303925,2303715,2303478,2303330,2303193,2302043,2301084,2299953,2299323,2299161,22…	-	-	-
229734	50	2	11.09	0.67	-4.04895	Down	2.51e-09	4.53e-08	jgi|Poptr1_1|229734|gw1.X.4431.1|CDS chrom=LG_X strand=- start=4499015 end=4506645 cdsStart=4499015 cdsEnd=4506645 sfCount=24 sfStarts=4506451,4505738,4505534,4504687,4504100,4503786,4503434,4503081,4502667,4502496,4502122,4501944,4501768,4501489,4501343,4501129,4500935,4500775,4500615,4500468,4500230,4499607,4499283,4499015, sfEnds=4506645,4505860,4505640,4504793,4504197,4503965,4503655,4503215,…	GO:0005634//nucleus	GO:0003677//DNA binding;GO:0005524//ATP binding;GO:0008026//ATP-dependent helicase activity;GO:0003676//nucleic acid binding;GO:0004386//helicase activity;GO:0004003//ATP-dependent DNA helicase activity;GO:0004004//ATP-dependent RNA helicase activity;GO:0008094//DNA-dependent ATPase activity;GO:0008186//RNA-dependent ATPase activity;GO:0015462//protein-transmembrane transporting ATPase activity;G…	-
589582	49	2	10.87	0.67	-4.02005	Down	4.02e-09	7.03e-08	jgi|Poptr1_1|589582|eugene3.00280318|CDS chrom=scaffold_28 strand=- start=3302923 end=3307169 cdsStart=3302923 cdsEnd=3307169 sfCount=11 sfStarts=3302923,3303568,3303847,3304081,3304503,3304724,3305586,3305792,3306067,3306486,3307083, sfEnds=3303470,3303781,3303955,3304302,3304603,3305228,3305691,3305935,3306164,3306574,3307169,	-	GO:0004289;GO:0008233//peptidase activity;GO:0042802//identical protein binding	GO:0006508//proteolysis;GO:0043086//negative regulation of catalytic activity
742490	71	3	15.75	1	-3.97728	Down	1.13e-12	3.02e-11	jgi|Poptr1_1|742490|estExt_Genewise1_v1.C_860028|CDS chrom=scaffold_86 strand=+ start=153342 end=156595 cdsStart=153765 cdsEnd=156369 sfCount=3 sfStarts=153342,155847,156139, sfEnds=154283,156050,156595,	-	-	-
204190	47	2	10.42	0.67	-3.95905	Down	1.03e-08	1.71e-07	jgi|Poptr1_1|204190|gw1.IX.4655.1|CDS chrom=LG_IX strand=+ start=10035417 end=10045769 cdsStart=10035417 cdsEnd=10045769 sfCount=21 sfStarts=10035417,10036691,10036864,10037058,10037219,10037457,10038135,10039152,10039339,10039640,10040673,10041066,10041409,10042602,10043828,10044062,10044202,10044501,10045231,10045455,10045686, sfEnds=10035633,10036751,10036942,10037137,10037313,10037556,1003820…	GO:0005963;GO:0017023//myosin phosphatase complex	GO:0003677//DNA binding;GO:0003918//DNA topoisomerase (ATP-hydrolyzing) activity;GO:0005524//ATP binding;GO:0016787//hydrolase activity;GO:0000158;GO:0004721//phosphoprotein phosphatase activity;GO:0004723//calcium-dependent protein serine/threonine phosphatase activity;GO:0004724//magnesium-dependent protein serine/threonine phosphatase activity;GO:0008420//CTD phosphatase activity;GO:0008597//c…	GO:0006259//DNA metabolic process;GO:0006265//DNA topological change
567668	45	2	9.98	0.67	-3.89681	Down	2.63e-08	4.02e-07	jgi|Poptr1_1|567668|eugene3.00102226|CDS chrom=LG_X strand=- start=19432921 end=19438182 cdsStart=19433180 cdsEnd=19438182 sfCount=13 sfStarts=19432921,19433285,19433856,19434343,19434484,19434612,19434858,19435344,19436073,19437004,19437140,19437314,19437773, sfEnds=19433183,19433782,19434046,19434405,19434523,19434748,19434968,19435402,19436166,19437048,19437229,19437389,19438182,	GO:0000151//ubiquitin ligase complex	GO:0004842//ubiquitin-protein ligase activity;GO:0008270//zinc ion binding	GO:0016567//protein ubiquitination
247852	45	2	9.98	0.67	-3.89681	Down	2.63e-08	4.02e-07	jgi|Poptr1_1|247852|gw1.XIX.252.1|CDS chrom=LG_XIX strand=- start=885496 end=897421 cdsStart=885496 cdsEnd=897421 sfCount=21 sfStarts=897179,896999,895223,894503,894186,893926,893360,893131,892933,892677,892233,892017,890673,889736,889181,888386,888172,887535,887285,887086,885496, sfEnds=897421,897091,895425,894575,894358,894100,893464,893241,893028,892859,892283,892142,890752,889844,889309,88845…	GO:0016020//membrane;GO:0016021//integral to membrane	GO:0016787//hydrolase activity;GO:0005524//ATP binding;GO:0015662//ATPase activity, coupled to transmembrane movement of ions, phosphorylative mechanism;GO:0003824//catalytic activity;GO:0016887//ATPase activity;GO:0016820//hydrolase activity, acting on acid anhydrides, catalyzing transmembrane movement of substances	GO:0008152//metabolic process;GO:0006812//cation transport
826946	44	2	9.76	0.67	-3.86465	Down	4.2e-08	6.18e-07	jgi|Poptr1_1|826946|estExt_fgenesh4_pg.C_440052|CDS chrom=scaffold_44 strand=+ start=558227 end=566343 cdsStart=558227 cdsEnd=566065 sfCount=14 sfStarts=558227,558724,559186,559697,560007,560254,560828,560976,561797,562514,564161,564365,565872,566015, sfEnds=558592,558950,559269,559764,560078,560609,560896,561064,562297,564028,564238,564476,565922,566343,	-	GO:0004308//exo-alpha-sialidase activity	-
255215	64	3	14.19	1	-3.8268	Down	2.97e-11	6.65e-10	jgi|Poptr1_1|255215|gw1.XVI.1154.1|CDS chrom=LG_XVI strand=- start=1630990 end=1633826 cdsStart=1630990 cdsEnd=1633826 sfCount=5 sfStarts=1633668,1633395,1632561,1632104,1630990, sfEnds=1633826,1633568,1633262,1632497,1631429,	GO:0005634//nucleus	GO:0003677//DNA binding	GO:0006355//regulation of transcription, DNA-dependent
553541	63	3	13.97	1	-3.80426	Down	4.73e-11	1.03e-09	jgi|Poptr1_1|553541|eugene3.00030174|CDS chrom=LG_III strand=+ start=2457647 end=2463907 cdsStart=2457647 cdsEnd=2463907 sfCount=4 sfStarts=2457647,2458443,2462758,2462912, sfEnds=2457871,2459467,2462809,2463907,	-	-	-
571830	42	2	9.31	0.67	-3.79655	Down	1.07e-07	1.51e-06	jgi|Poptr1_1|571830|eugene3.00131194|CDS chrom=LG_XIII strand=- start=12086601 end=12088268 cdsStart=12086601 cdsEnd=12088268 sfCount=1 sfStarts=12086601, sfEnds=12088268,	-	-	-
816257	42	2	9.31	0.67	-3.79655	Down	1.07e-07	1.5e-06	jgi|Poptr1_1|816257|estExt_fgenesh4_pg.C_LG_II0718|CDS chrom=LG_II strand=+ start=5471514 end=5476130 cdsStart=5471514 cdsEnd=5475861 sfCount=12 sfStarts=5471514,5471837,5472649,5472937,5473209,5473445,5474121,5474559,5475471,5475823,5475925,5475997, sfEnds=5471803,5472103,5472860,5473127,5473344,5473542,5474186,5474648,5475647,5475892,5475939,5476130,	-	GO:0031072//heat shock protein binding;GO:0051082//unfolded protein binding	GO:0006457//protein folding
784463	42	2	9.31	0.67	-3.79655	Down	1.07e-07	1.5e-06	jgi|Poptr1_1|784463|fgenesh4_pg.C_scaffold_129000038|CDS chrom=scaffold_129 strand=- start=470210 end=475633 cdsStart=470210 cdsEnd=475633 sfCount=6 sfStarts=470210,471294,472163,474553,474784,475483, sfEnds=471156,471357,472330,474686,474945,475633,	-	GO:0000156//two-component response regulator activity;GO:0003677//DNA binding	GO:0000160//two-component signal transduction system (phosphorelay);GO:0006355//regulation of transcription, DNA-dependent
799706	100	5	22.18	1.67	-3.73134	Down	1.07e-16	4.53e-15	jgi|Poptr1_1|799706|fgenesh4_pm.C_LG_III000171|CDS chrom=LG_III strand=- start=7212065 end=7219793 cdsStart=7212065 cdsEnd=7219793 sfCount=15 sfStarts=7212065,7213484,7213882,7214127,7214586,7214732,7215169,7215388,7215998,7216297,7216502,7217597,7218129,7218471,7219622, sfEnds=7212584,7213782,7214037,7214438,7214655,7214859,7215303,7215513,7216168,7216419,7216630,7217920,7218431,7219591,7219793,	-	-	-
1104838	40	2	8.87	0.67	-3.7267	Down	2.7e-07	3.59e-06	jgi|Poptr1_1|1104838|estExt_Genewise1Plus.C_LG_XVII0200|CDS chrom=LG_XVII strand=- start=671630 end=673683 cdsStart=671839 cdsEnd=673683 sfCount=3 sfStarts=671630,672373,673133, sfEnds=672243,672661,673683,	-	-	-
550419	39	2	8.65	0.67	-3.69047	Down	4.29e-07	5.55e-06	jgi|Poptr1_1|550419|eugene3.00012860|CDS chrom=LG_I strand=- start=32820230 end=32839471 cdsStart=32820585 cdsEnd=32839471 sfCount=55 sfStarts=32820230,32820973,32821338,32821570,32821805,32822007,32822332,32823837,32824074,32824423,32824626,32825461,32825666,32826025,32826172,32826433,32826626,32826946,32827178,32827369,32827554,32827713,32827892,32828102,32828289,32828450,32828696,32828896,3282…	-	-	GO:0006886//intracellular protein transport
773396	39	2	8.65	0.67	-3.69047	Down	4.29e-07	5.54e-06	jgi|Poptr1_1|773396|fgenesh4_pg.C_LG_XII001171|CDS chrom=LG_XII strand=- start=13035821 end=13039371 cdsStart=13035821 cdsEnd=13039371 sfCount=2 sfStarts=13035821,13039052, sfEnds=13036376,13039371,	-	-	-
583471	38	2	8.43	0.67	-3.6533	Down	6.81e-07	8.52e-06	jgi|Poptr1_1|583471|eugene3.01500020|CDS chrom=scaffold_150 strand=- start=198656 end=208465 cdsStart=199223 cdsEnd=208465 sfCount=23 sfStarts=198656,198794,199888,200316,200476,200790,201074,201610,202180,202771,203028,203906,204126,204864,205072,205905,206348,206801,207294,207598,207811,208015,208304, sfEnds=198706,199437,200060,200383,200589,200938,201221,201666,202256,202906,203112,204033,204…	-	GO:0005525//GTP binding;GO:0003924//GTPase activity;GO:0008549//dynamin GTPase activity	-
560298	37	2	8.21	0.67	-3.61515	Down	1.08e-06	1.29e-05	jgi|Poptr1_1|560298|eugene3.00060257|CDS chrom=LG_VI strand=+ start=1748584 end=1755132 cdsStart=1748584 cdsEnd=1754518 sfCount=20 sfStarts=1748584,1748697,1748853,1749091,1749270,1749532,1750193,1750435,1750747,1750962,1751449,1751803,1752017,1752509,1752881,1753151,1753456,1753722,1754066,1754214, sfEnds=1748601,1748785,1748910,1749186,1749371,1749615,1750318,1750578,1750838,1751043,1751634,175…	-	-	-
753807	37	2	8.21	0.67	-3.61515	Down	1.08e-06	1.29e-05	jgi|Poptr1_1|753807|fgenesh4_pg.C_LG_I003410|CDS chrom=LG_I strand=- start=35441628 end=35447263 cdsStart=35441628 cdsEnd=35447263 sfCount=3 sfStarts=35441628,35445137,35447052, sfEnds=35444693,35446301,35447263,	-	-	-
752475	111	6	24.62	2.01	-3.61456	Down	5.2e-18	2.39e-16	jgi|Poptr1_1|752475|fgenesh4_pg.C_LG_I002078|CDS chrom=LG_I strand=+ start=20761571 end=20764296 cdsStart=20761571 cdsEnd=20764296 sfCount=3 sfStarts=20761571,20762033,20763172, sfEnds=20761879,20763040,20764296,	-	-	-
784798	36	2	7.98	0.67	-3.57416	Down	1.71e-06	1.96e-05	jgi|Poptr1_1|784798|fgenesh4_pg.C_scaffold_133000059|CDS chrom=scaffold_133 strand=- start=383441 end=384492 cdsStart=383441 cdsEnd=384492 sfCount=3 sfStarts=383441,384016,384390, sfEnds=383616,384183,384492,	-	GO:0004857//enzyme inhibitor activity;GO:0030599//pectinesterase activity	-
177760	36	2	7.98	0.67	-3.57416	Down	1.71e-06	1.96e-05	jgi|Poptr1_1|177760|gw1.I.6360.1|CDS chrom=LG_I strand=- start=121227 end=126129 cdsStart=121227 cdsEnd=126129 sfCount=16 sfStarts=126054,125820,125484,125143,124730,124036,123815,123067,122882,122685,122543,122377,122033,121491,121358,121227, sfEnds=126129,125939,125579,125382,124959,124140,123928,123394,122986,122786,122600,122445,122120,121552,121409,121286,	GO:0005952//cAMP-dependent protein kinase complex;GO:0005956//protein kinase CK2 complex	GO:0004672//protein kinase activity;GO:0004682//protein kinase CK2 activity;GO:0004691//cAMP-dependent protein kinase activity;GO:0008603//cAMP-dependent protein kinase regulator activity;GO:0008605//protein kinase CK2 regulator activity	-
833878	35	2	7.76	0.67	-3.53382	Down	2.7e-06	2.97e-05	jgi|Poptr1_1|833878|estExt_fgenesh4_pm.C_LG_X0918|CDS chrom=LG_X strand=+ start=19527032 end=19538917 cdsStart=19527252 cdsEnd=19538917 sfCount=27 sfStarts=19527032,19527367,19527621,19528000,19528241,19528626,19528976,19529164,19529482,19529665,19529939,19530203,19530587,19531938,19532193,19532682,19533599,19534273,19534644,19535104,19535273,19536253,19536541,19536840,19538188,19538376,19538813,…	-	GO:0004553//hydrolase activity, hydrolyzing O-glycosyl compounds;GO:0004556//alpha-amylase activity;GO:0008933//lytic transglycosylase activity;GO:0015923//mannosidase activity;GO:0015924;GO:0015925;GO:0015926//glucosidase activity;GO:0015927//trehalase activity;GO:0015928//fucosidase activity;GO:0015929//hexosaminidase activity;GO:0016160//amylase activity	GO:0005975//carbohydrate metabolic process
644359	87	5	19.29	1.67	-3.52993	Down	4.14e-14	1.38e-12	jgi|Poptr1_1|644359|grail3.0033032301|CDS chrom=LG_II strand=- start=11207423 end=11209543 cdsStart=11207825 cdsEnd=11209435 sfCount=4 sfStarts=11207423,11208308,11208756,11209307, sfEnds=11207902,11208430,11209082,11209543,	-	-	-
753305	52	3	11.53	1	-3.52732	Down	7.48e-09	1.27e-07	jgi|Poptr1_1|753305|fgenesh4_pg.C_LG_I002908|CDS chrom=LG_I strand=- start=30188987 end=30192438 cdsStart=30188987 cdsEnd=30192438 sfCount=2 sfStarts=30188987,30190570, sfEnds=30189082,30192438,	-	-	-
859257	34	2	7.54	0.67	-3.49233	Down	4.27e-06	4.54e-05	jgi|Poptr1_1|859257|e_gw1.IV.703.1|CDS chrom=LG_IV strand=- start=14858768 end=14864018 cdsStart=14858768 cdsEnd=14864018 sfCount=12 sfStarts=14858768,14858986,14859568,14859769,14860045,14860471,14860689,14861550,14861796,14862509,14862886,14863761, sfEnds=14858896,14859062,14859689,14859950,14860155,14860518,14860828,14861687,14861943,14862578,14862989,14864018,	-	-	-
895551	34	2	7.54	0.67	-3.49233	Down	4.27e-06	4.54e-05	jgi|Poptr1_1|895551|e_gw1.XIII.1514.1|CDS chrom=LG_XIII strand=- start=2837691 end=2846590 cdsStart=2837691 cdsEnd=2846590 sfCount=9 sfStarts=2837691,2838686,2840481,2841748,2842072,2842750,2843316,2843651,2846381, sfEnds=2838483,2839761,2841462,2842017,2842625,2842924,2843409,2844719,2846590,	-	-	-
561655	50	3	11.09	1	-3.47119	Down	1.86e-08	2.95e-07	jgi|Poptr1_1|561655|eugene3.00061614|CDS chrom=LG_VI strand=+ start=15280813 end=15282727 cdsStart=15280856 cdsEnd=15282202 sfCount=1 sfStarts=15280813, sfEnds=15282727,	GO:0016020//membrane	GO:0016491//oxidoreductase activity;GO:0016717//oxidoreductase activity, acting on paired donors, with oxidation of a pair of donors resulting in the reduction of molecular oxygen to two molecules of water	GO:0006636//unsaturated fatty acid biosynthetic process
574538	83	5	18.41	1.67	-3.46257	Down	2.54e-13	7.64e-12	jgi|Poptr1_1|574538|eugene3.00191012|CDS chrom=LG_XIX strand=- start=11447953 end=11450483 cdsStart=11447953 cdsEnd=11450483 sfCount=3 sfStarts=11447953,11449180,11450280, sfEnds=11449047,11450175,11450483,	-	-	-
821155	33	2	7.32	0.67	-3.44961	Down	6.73e-06	6.75e-05	jgi|Poptr1_1|821155|estExt_fgenesh4_pg.C_LG_IX0440|CDS chrom=LG_IX strand=+ start=2789211 end=2792834 cdsStart=2789211 cdsEnd=2792515 sfCount=8 sfStarts=2789211,2789580,2789983,2790265,2790988,2791508,2792083,2792317, sfEnds=2789267,2789780,2790094,2790494,2791126,2791728,2792204,2792834,	-	GO:0016787//hydrolase activity;GO:0003993//acid phosphatase activity	-
762059	33	2	7.32	0.67	-3.44961	Down	6.73e-06	6.75e-05	jgi|Poptr1_1|762059|fgenesh4_pg.C_LG_VI000369|CDS chrom=LG_VI strand=+ start=2953549 end=2957893 cdsStart=2953549 cdsEnd=2957893 sfCount=11 sfStarts=2953549,2954637,2954923,2955572,2955774,2956073,2956289,2956718,2957157,2957445,2957669, sfEnds=2953862,2954769,2954975,2955680,2955908,2956117,2956476,2956850,2957203,2957532,2957893,	-	-	-
1067623	33	2	7.32	0.67	-3.44961	Down	6.73e-06	6.74e-05	jgi|Poptr1_1|1067623|estExt_Genewise1Plus.C_LG_I3981|CDS chrom=LG_I strand=+ start=14073826 end=14080631 cdsStart=14074010 cdsEnd=14080379 sfCount=16 sfStarts=14073826,14076846,14077076,14077279,14077456,14077606,14077897,14078105,14078296,14078545,14078911,14079279,14079611,14079787,14080048,14080320, sfEnds=14074417,14076977,14077149,14077348,14077517,14077677,14077991,14078171,14078425,1407876…	-	-	-
712230	33	2	7.32	0.67	-3.44961	Down	6.73e-06	6.74e-05	jgi|Poptr1_1|712230|estExt_Genewise1_v1.C_LG_III1502|CDS chrom=LG_III strand=+ start=1328503 end=1337529 cdsStart=1328512 cdsEnd=1337190 sfCount=10 sfStarts=1328503,1328852,1329176,1329603,1330656,1333278,1333482,1333827,1335909,1336656, sfEnds=1328754,1329080,1329424,1329653,1330916,1333330,1333602,1334081,1336431,1337529,	GO:0016020//membrane	GO:0015079//potassium ion transmembrane transporter activity	GO:0006813//potassium ion transport
751713	49	3	10.87	1	-3.44228	Down	2.92e-08	4.4e-07	jgi|Poptr1_1|751713|fgenesh4_pg.C_LG_I001316|CDS chrom=LG_I strand=+ start=12393157 end=12394629 cdsStart=12393157 cdsEnd=12394629 sfCount=2 sfStarts=12393157,12393278, sfEnds=12393211,12394629,	GO:0016020//membrane	GO:0005279	GO:0006865//amino acid transport
826351	32	2	7.1	0.67	-3.40559	Down	1.06e-05	0.000101365	jgi|Poptr1_1|826351|estExt_fgenesh4_pg.C_280029|CDS chrom=scaffold_28 strand=+ start=370597 end=374120 cdsStart=370597 cdsEnd=373827 sfCount=2 sfStarts=370597,373163, sfEnds=372223,374120,	-	GO:0004289;GO:0008233//peptidase activity;GO:0042802//identical protein binding	GO:0006508//proteolysis;GO:0043086//negative regulation of catalytic activity
561195	32	2	7.1	0.67	-3.40559	Down	1.06e-05	0.000101284	jgi|Poptr1_1|561195|eugene3.00061154|CDS chrom=LG_VI strand=- start=10469904 end=10480656 cdsStart=10470198 cdsEnd=10480656 sfCount=31 sfStarts=10469904,10470466,10470685,10470930,10471152,10472497,10472777,10473120,10473287,10473483,10473758,10474032,10474484,10474687,10474868,10475359,10475575,10475807,10476004,10476245,10476548,10477213,10477485,10478191,10478385,10478567,10478884,10479776,104…	-	GO:0004197//cysteine-type endopeptidase activity;GO:0004221//ubiquitin thiolesterase activity;GO:0003690//double-stranded DNA binding	GO:0006511//ubiquitin-dependent protein catabolic process;GO:0006265//DNA topological change
219297	32	2	7.1	0.67	-3.40559	Down	1.06e-05	0.000101204	jgi|Poptr1_1|219297|gw1.VII.3602.1|CDS chrom=LG_VII strand=- start=10935625 end=10936392 cdsStart=10935625 cdsEnd=10936392 sfCount=1 sfStarts=10935625, sfEnds=10936392,	GO:0016020//membrane	-	-
822682	32	2	7.1	0.67	-3.40559	Down	1.06e-05	0.000101124	jgi|Poptr1_1|822682|estExt_fgenesh4_pg.C_LG_X2216|CDS chrom=LG_X strand=- start=20535604 end=20548143 cdsStart=20536076 cdsEnd=20548143 sfCount=32 sfStarts=20535604,20536314,20536494,20536763,20537044,20537658,20538611,20538881,20539039,20539231,20539499,20540723,20540934,20541130,20541313,20541513,20542009,20542887,20543160,20543340,20543571,20544021,20544270,20544564,20544818,20545028,20545231,…	-	GO:0004197//cysteine-type endopeptidase activity;GO:0004221//ubiquitin thiolesterase activity;GO:0003690//double-stranded DNA binding	GO:0006511//ubiquitin-dependent protein catabolic process;GO:0006265//DNA topological change
804044	64	4	14.19	1.34	-3.40457	Down	2.1e-10	4.3e-09	jgi|Poptr1_1|804044|fgenesh4_pm.C_LG_IX000091|CDS chrom=LG_IX strand=+ start=1094792 end=1105247 cdsStart=1094792 cdsEnd=1105247 sfCount=27 sfStarts=1094792,1096628,1097145,1097478,1097617,1097805,1098260,1098414,1099275,1099528,1099923,1100133,1100778,1100981,1101178,1101375,1101574,1101830,1102121,1102612,1102834,1103107,1103314,1104370,1104530,1104931,1105100, sfEnds=1094908,1096759,1097270,10…	GO:0030130//clathrin coat of trans-Golgi network vesicle	-	GO:0006461//protein complex assembly;GO:0006886//intracellular protein transport
294001	64	4	14.19	1.34	-3.40457	Down	2.1e-10	4.29e-09	jgi|Poptr1_1|294001|gw1.66.674.1|CDS chrom=scaffold_66 strand=+ start=1491699 end=1500344 cdsStart=1491699 cdsEnd=1500344 sfCount=12 sfStarts=1491699,1492612,1493078,1493750,1494284,1495217,1496190,1496722,1497327,1497767,1498679,1499745, sfEnds=1492497,1492799,1493424,1494083,1494706,1495331,1496440,1497224,1497648,1498124,1499352,1500344,	-	-	-
828548	31	2	6.87	0.67	-3.35808	Down	1.67e-05	0.000151439	jgi|Poptr1_1|828548|estExt_fgenesh4_pg.C_1680031|CDS chrom=scaffold_168 strand=- start=333341 end=337198 cdsStart=333567 cdsEnd=337198 sfCount=9 sfStarts=333341,334510,334849,335057,335400,335643,336352,336496,336802, sfEnds=333988,334673,334950,335268,335555,335792,336411,336623,337198,	-	GO:0004672//protein kinase activity;GO:0005524//ATP binding;GO:0004713//protein tyrosine kinase activity;GO:0004674//protein serine/threonine kinase activity;GO:0004707//MAP kinase activity;GO:0004675//transmembrane receptor protein serine/threonine kinase activity;GO:0004676//3-phosphoinositide-dependent protein kinase activity;GO:0004677//DNA-dependent protein kinase activity;GO:0004679//AMP-ac…	GO:0006468//protein amino acid phosphorylation
429275	31	2	6.87	0.67	-3.35808	Down	1.67e-05	0.000151325	jgi|Poptr1_1|429275|gw1.VIII.2.1|CDS chrom=LG_VIII strand=+ start=9718607 end=9722402 cdsStart=9718607 cdsEnd=9722402 sfCount=9 sfStarts=9718607,9720655,9720905,9721214,9721445,9721756,9721917,9722099,9722379, sfEnds=9718677,9720736,9721109,9721326,9721567,9721825,9721995,9722180,9722402,	-	-	-
1101454	31	2	6.87	0.67	-3.35808	Down	1.67e-05	0.000151211	jgi|Poptr1_1|1101454|estExt_Genewise1Plus.C_LG_XV1745|CDS chrom=LG_XV strand=+ start=6349781 end=6354305 cdsStart=6349781 cdsEnd=6353657 sfCount=8 sfStarts=6349781,6350075,6350284,6350611,6350941,6352182,6352731,6352954, sfEnds=6349867,6350112,6350511,6350834,6351098,6352365,6352874,6354305,	-	-	-
282262	31	2	6.87	0.67	-3.35808	Down	1.67e-05	0.000151097	jgi|Poptr1_1|282262|gw1.28.836.1|CDS chrom=scaffold_28 strand=- start=2590245 end=2595468 cdsStart=2590245 cdsEnd=2595468 sfCount=8 sfStarts=2594237,2593558,2592672,2592242,2591868,2591466,2590790,2590245, sfEnds=2595468,2593725,2592837,2592352,2592055,2591623,2590949,2590509,	-	GO:0016308//1-phosphatidylinositol-4-phosphate 5-kinase activity;GO:0004431	-
755219	106	7	23.51	2.34	-3.32869	Down	3.35e-16	1.36e-14	jgi|Poptr1_1|755219|fgenesh4_pg.C_LG_II001399|CDS chrom=LG_II strand=+ start=11528682 end=11536278 cdsStart=11528682 cdsEnd=11536278 sfCount=12 sfStarts=11528682,11528896,11529153,11530934,11531618,11532009,11532419,11532659,11533857,11534512,11535058,11535985, sfEnds=11528817,11529098,11530520,11531050,11531812,11532257,11532487,11532806,11534005,11534688,11535255,11536278,	GO:0016020//membrane	GO:0003824//catalytic activity;GO:0004630//phospholipase D activity;GO:0005509//calcium ion binding	GO:0008152//metabolic process;GO:0046470//phosphatidylcholine metabolic process
596946	30	2	6.65	0.67	-3.31112	Down	2.61e-05	0.000229079	jgi|Poptr1_1|596946|eugene3.00870022|CDS chrom=scaffold_87 strand=- start=346311 end=350839 cdsStart=346311 cdsEnd=350839 sfCount=9 sfStarts=346311,347760,348294,348511,348792,349899,350049,350373,350801, sfEnds=347431,348014,348411,348563,349052,349952,350291,350607,350839,	GO:0016020//membrane	GO:0015079//potassium ion transmembrane transporter activity	GO:0006813//potassium ion transport
249403	30	2	6.65	0.67	-3.31112	Down	2.61e-05	0.000228913	jgi|Poptr1_1|249403|gw1.XIX.1803.1|CDS chrom=LG_XIX strand=- start=8536838 end=8540376 cdsStart=8536838 cdsEnd=8540376 sfCount=7 sfStarts=8540290,8539484,8539020,8538474,8538015,8537464,8536838, sfEnds=8540376,8539768,8539337,8538701,8538115,8537845,8536987,	GO:0005952//cAMP-dependent protein kinase complex;GO:0005956//protein kinase CK2 complex	GO:0004672//protein kinase activity;GO:0005524//ATP binding;GO:0004713//protein tyrosine kinase activity;GO:0004674//protein serine/threonine kinase activity;GO:0004682//protein kinase CK2 activity;GO:0004691//cAMP-dependent protein kinase activity;GO:0008603//cAMP-dependent protein kinase regulator activity;GO:0008605//protein kinase CK2 regulator activity	GO:0006468//protein amino acid phosphorylation
712800	30	2	6.65	0.67	-3.31112	Down	2.61e-05	0.000228746	jgi|Poptr1_1|712800|estExt_Genewise1_v1.C_LG_IV0101|CDS chrom=LG_IV strand=+ start=12384932 end=12394835 cdsStart=12384995 cdsEnd=12394655 sfCount=16 sfStarts=12384932,12385670,12386033,12386624,12386958,12387535,12388433,12388638,12388849,12389285,12390447,12390840,12391436,12393550,12394026,12394539, sfEnds=12385106,12385905,12386134,12386800,12387233,12387806,12388550,12388782,12389159,1238943…	-	GO:0004645//phosphorylase activity;GO:0008184//glycogen phosphorylase activity	GO:0005975//carbohydrate metabolic process
569943	30	2	6.65	0.67	-3.31112	Down	2.61e-05	0.000228581	jgi|Poptr1_1|569943|eugene3.00120596|CDS chrom=LG_XII strand=- start=7926114 end=7935765 cdsStart=7926114 cdsEnd=7935765 sfCount=16 sfStarts=7926114,7926984,7927693,7928448,7928829,7929150,7929426,7929991,7930198,7930477,7931394,7931580,7933111,7934344,7935375,7935680, sfEnds=7926242,7927153,7927772,7928593,7928931,7929337,7929740,7930098,7930347,7930653,7931492,7931645,7933221,7934418,7935552,79…	-	GO:0003676//nucleic acid binding;GO:0004386//helicase activity;GO:0005524//ATP binding;GO:0004519//endonuclease activity	-
806679	30	2	6.65	0.67	-3.31112	Down	2.61e-05	0.000228415	jgi|Poptr1_1|806679|fgenesh4_pm.C_LG_XII000499|CDS chrom=LG_XII strand=+ start=13768616 end=13779377 cdsStart=13768616 cdsEnd=13779377 sfCount=18 sfStarts=13768616,13770323,13770522,13770791,13772025,13773155,13773862,13775166,13775344,13775592,13776697,13777004,13777570,13777952,13778084,13778245,13778869,13779288, sfEnds=13768697,13770390,13770671,13771995,13772124,13773324,13774111,13775258,13…	GO:0005952//cAMP-dependent protein kinase complex;GO:0005956//protein kinase CK2 complex	GO:0004672//protein kinase activity;GO:0005524//ATP binding;GO:0004713//protein tyrosine kinase activity;GO:0004674//protein serine/threonine kinase activity;GO:0004682//protein kinase CK2 activity;GO:0004691//cAMP-dependent protein kinase activity;GO:0008603//cAMP-dependent protein kinase regulator activity;GO:0008605//protein kinase CK2 regulator activity	GO:0006468//protein amino acid phosphorylation
816497	30	2	6.65	0.67	-3.31112	Down	2.61e-05	0.00022825	jgi|Poptr1_1|816497|estExt_fgenesh4_pg.C_LG_II1181|CDS chrom=LG_II strand=- start=9795979 end=9798721 cdsStart=9796183 cdsEnd=9798689 sfCount=7 sfStarts=9795979,9796687,9796957,9797673,9798279,9798429,9798613, sfEnds=9796306,9796811,9797072,9797787,9798338,9798498,9798721,	-	-	-
766186	30	2	6.65	0.67	-3.31112	Down	2.61e-05	0.000228084	jgi|Poptr1_1|766186|fgenesh4_pg.C_LG_VIII001200|CDS chrom=LG_VIII strand=- start=8857457 end=8866514 cdsStart=8857457 cdsEnd=8866514 sfCount=20 sfStarts=8857457,8857952,8858915,8859294,8859527,8859900,8860162,8861742,8862364,8862636,8862807,8863230,8863539,8863733,8863973,8864114,8864326,8866060,8866236,8866431, sfEnds=8857558,8858254,8858983,8859422,8859688,8860020,8860277,8861807,8862445,886272…	-	-	-
815822	89	6	19.74	2.01	-3.29585	Down	1.08e-13	3.45e-12	jgi|Poptr1_1|815822|estExt_fgenesh4_pg.C_LG_I3001|CDS chrom=LG_I strand=+ start=31449392 end=31454945 cdsStart=31449743 cdsEnd=31454945 sfCount=12 sfStarts=31449392,31449445,31449644,31451115,31451723,31451939,31452585,31452832,31453199,31453518,31453790,31454518, sfEnds=31449419,31449610,31449766,31451523,31451850,31451998,31452734,31452987,31453410,31453619,31453953,31454945,	-	GO:0004672//protein kinase activity;GO:0005524//ATP binding;GO:0004713//protein tyrosine kinase activity;GO:0004674//protein serine/threonine kinase activity;GO:0004707//MAP kinase activity;GO:0004675//transmembrane receptor protein serine/threonine kinase activity;GO:0004676//3-phosphoinositide-dependent protein kinase activity;GO:0004677//DNA-dependent protein kinase activity;GO:0004679//AMP-ac…	GO:0006468//protein amino acid phosphorylation
780566	44	3	9.76	1	-3.28688	Down	2.77e-07	3.69e-06	jgi|Poptr1_1|780566|fgenesh4_pg.C_LG_XIX000705|CDS chrom=LG_XIX strand=- start=8893507 end=8898900 cdsStart=8893507 cdsEnd=8898900 sfCount=12 sfStarts=8893507,8893619,8894188,8894409,8895082,8896069,8896505,8897527,8897727,8897958,8898360,8898752, sfEnds=8893533,8893740,8894286,8894895,8895182,8896192,8896600,8897603,8897825,8898053,8898466,8898900,	-	-	-
741584	131	9	29.05	3.01	-3.2707	Down	1.83e-19	9.03e-18	jgi|Poptr1_1|741584|estExt_Genewise1_v1.C_640607|CDS chrom=scaffold_64 strand=+ start=1865475 end=1879628 cdsStart=1865475 cdsEnd=1879432 sfCount=24 sfStarts=1865475,1865829,1866135,1867144,1867331,1867696,1868547,1869274,1869471,1870893,1871153,1871347,1872600,1872865,1873036,1873634,1874172,1875564,1876637,1876889,1877171,1877801,1878375,1879097, sfEnds=1865605,1866042,1866251,1867236,1867505,1…	GO:0005576//extracellular region;GO:0016020//membrane;GO:0016021//integral to membrane	GO:0005179//hormone activity;GO:0005524//ATP binding;GO:0015662//ATPase activity, coupled to transmembrane movement of ions, phosphorylative mechanism;GO:0003824//catalytic activity;GO:0016887//ATPase activity;GO:0004012//phospholipid-translocating ATPase activity	GO:0006812//cation transport;GO:0008152//metabolic process
754002	29	2	6.43	0.67	-3.26259	Down	4.1e-05	0.000343494	jgi|Poptr1_1|754002|fgenesh4_pg.C_LG_II000182|CDS chrom=LG_II strand=+ start=1117483 end=1123784 cdsStart=1117483 cdsEnd=1123784 sfCount=22 sfStarts=1117483,1117653,1117847,1118050,1118394,1118692,1118841,1119039,1119547,1119696,1120169,1120490,1120809,1120986,1121371,1121772,1122151,1122578,1122800,1123011,1123368,1123574, sfEnds=1117575,1117753,1117963,1118235,1118481,1118748,1118930,1119161,11…	-	-	-
567249	29	2	6.43	0.67	-3.26259	Down	4.1e-05	0.000343255	jgi|Poptr1_1|567249|eugene3.00101807|CDS chrom=LG_X strand=- start=16701709 end=16712212 cdsStart=16701855 cdsEnd=16712212 sfCount=30 sfStarts=16701709,16702226,16702508,16703049,16703314,16703589,16704416,16705498,16705857,16706100,16706461,16706650,16706833,16706973,16707201,16707436,16707673,16707913,16708153,16708466,16708685,16708837,16709148,16709463,16709673,16710282,16710577,16710779,1671…	GO:0030125//clathrin vesicle coat	GO:0003824//catalytic activity	-
818811	43	3	9.54	1	-3.25399	Down	4.33e-07	5.59e-06	jgi|Poptr1_1|818811|estExt_fgenesh4_pg.C_LG_V1537|CDS chrom=LG_V strand=- start=16710496 end=16714455 cdsStart=16710864 cdsEnd=16714455 sfCount=13 sfStarts=16710496,16711037,16711727,16712490,16712628,16712813,16712970,16713252,16713478,16713700,16713884,16714172,16714378, sfEnds=16710930,16711134,16711792,16712543,16712717,16712861,16713100,16713350,16713513,16713790,16714073,16714262,16714455,	-	-	-
770549	28	2	6.21	0.67	-3.21236	Down	6.41e-05	0.000509644	jgi|Poptr1_1|770549|fgenesh4_pg.C_LG_X002039|CDS chrom=LG_X strand=- start=19142618 end=19146881 cdsStart=19142618 cdsEnd=19146881 sfCount=2 sfStarts=19142618,19146669, sfEnds=19144549,19146881,	GO:0000151//ubiquitin ligase complex	GO:0004842//ubiquitin-protein ligase activity;GO:0008270//zinc ion binding	GO:0016567//protein ubiquitination
272274	56	4	12.42	1.34	-3.21236	Down	7.5e-09	1.27e-07	jgi|Poptr1_1|272274|gw1.150.89.1|CDS chrom=scaffold_150 strand=+ start=296536 end=297726 cdsStart=296536 cdsEnd=297726 sfCount=1 sfStarts=296536, sfEnds=297726,	-	-	-
841719	28	2	6.21	0.67	-3.21236	Down	6.41e-05	0.000509308	jgi|Poptr1_1|841719|e_gw1.I.9638.1|CDS chrom=LG_I strand=- start=10086429 end=10095015 cdsStart=10086429 cdsEnd=10095015 sfCount=23 sfStarts=10086429,10086906,10087302,10087916,10088085,10088708,10088936,10089601,10089815,10090011,10090300,10090462,10090929,10091689,10091865,10092144,10092867,10093112,10093332,10093803,10094634,10094837,10094992, sfEnds=10086602,10087053,10087408,10088009,1008828…	-	-	-
209890	28	2	6.21	0.67	-3.21236	Down	6.41e-05	0.000508972	jgi|Poptr1_1|209890|gw1.V.5291.1|CDS chrom=LG_V strand=+ start=11483997 end=11484365 cdsStart=11483997 cdsEnd=11484365 sfCount=1 sfStarts=11483997, sfEnds=11484365,	-	-	-
869864	55	4	12.2	1.34	-3.18658	Down	1.17e-08	1.93e-07	jgi|Poptr1_1|869864|e_gw1.VII.2562.1|CDS chrom=LG_VII strand=- start=6515409 end=6516840 cdsStart=6515409 cdsEnd=6516840 sfCount=4 sfStarts=6515409,6515828,6516018,6516269, sfEnds=6515738,6515922,6516142,6516840,	-	-	-
649767	96	7	21.29	2.34	-3.1856	Down	2.83e-14	9.65e-13	jgi|Poptr1_1|649767|grail3.0001075101|CDS chrom=LG_IX strand=+ start=5240799 end=5242575 cdsStart=5240937 cdsEnd=5242283 sfCount=1 sfStarts=5240799, sfEnds=5242575,	-	-	-
820152	41	3	9.09	1	-3.18428	Down	1.05e-06	1.26e-05	jgi|Poptr1_1|820152|estExt_fgenesh4_pg.C_LG_VIII0005|CDS chrom=LG_VIII strand=+ start=20735 end=28202 cdsStart=20735 cdsEnd=27782 sfCount=8 sfStarts=20735,21128,21805,21975,23210,25055,26055,27633, sfEnds=21028,21499,21898,22012,23356,25154,26995,28202,	-	GO:0004143//diacylglycerol kinase activity;GO:0008481//sphinganine kinase activity	GO:0007205//activation of protein kinase C activity by G-protein coupled receptor protein signaling pathway
573380	68	5	15.08	1.67	-3.17472	Down	2.07e-10	4.26e-09	jgi|Poptr1_1|573380|eugene3.00141425|CDS chrom=LG_XIV strand=- start=12751395 end=12759208 cdsStart=12751541 cdsEnd=12759208 sfCount=11 sfStarts=12751395,12752167,12752529,12753054,12753663,12753974,12754950,12755261,12756545,12756708,12757160, sfEnds=12751653,12752406,12752592,12753359,12753877,12754268,12755114,12755947,12756631,12757028,12759208,	GO:0016021//integral to membrane	GO:0005524//ATP binding;GO:0042626//ATPase activity, coupled to transmembrane movement of substances;GO:0016887//ATPase activity;GO:0000166//nucleotide binding;GO:0017111//nucleoside-triphosphatase activity	GO:0006810//transport
576971	27	2	5.99	0.67	-3.16032	Down	0.000100023	0.000758128	jgi|Poptr1_1|576971|eugene3.00161106|CDS chrom=LG_XVI strand=- start=10966338 end=10970989 cdsStart=10966757 cdsEnd=10970989 sfCount=14 sfStarts=10966338,10966920,10967084,10967553,10967740,10967957,10968374,10968531,10969048,10969282,10969691,10969969,10970444,10970640, sfEnds=10966804,10966986,10967194,10967618,10967854,10968066,10968438,10968593,10969170,10969380,10969801,10970084,10970529,109…	-	-	-
256737	27	2	5.99	0.67	-3.16032	Down	0.000100023	0.000757652	jgi|Poptr1_1|256737|gw1.XVI.2676.1|CDS chrom=LG_XVI strand=+ start=6551236 end=6554192 cdsStart=6551236 cdsEnd=6554192 sfCount=8 sfStarts=6551236,6552505,6552831,6553378,6553559,6553771,6553919,6554130, sfEnds=6552399,6552735,6552935,6553458,6553631,6553880,6554041,6554192,	GO:0005622//intracellular	GO:0004842//ubiquitin-protein ligase activity	GO:0006464//protein modification process;GO:0006512//ubiquitin cycle
651897	27	2	5.99	0.67	-3.16032	Down	0.000100023	0.000757177	jgi|Poptr1_1|651897|grail3.0002053601|CDS chrom=LG_V strand=- start=15562447 end=15563060 cdsStart=15562447 cdsEnd=15563010 sfCount=1 sfStarts=15562447, sfEnds=15563060,	-	-	-
815464	40	3	8.87	1	-3.14893	Down	1.64e-06	1.9e-05	jgi|Poptr1_1|815464|estExt_fgenesh4_pg.C_LG_I2043|CDS chrom=LG_I strand=- start=20563856 end=20570424 cdsStart=20564107 cdsEnd=20570424 sfCount=6 sfStarts=20563856,20564966,20565488,20566865,20568767,20570280, sfEnds=20564703,20565398,20566356,20567659,20568984,20570424,	-	GO:0004839//ubiquitin activating enzyme activity;GO:0003824//catalytic activity;GO:0004842//ubiquitin-protein ligase activity	GO:0006464//protein modification process;GO:0006512//ubiquitin cycle
590042	40	3	8.87	1	-3.14893	Down	1.64e-06	1.9e-05	jgi|Poptr1_1|590042|eugene3.00290225|CDS chrom=scaffold_29 strand=+ start=2460112 end=2461110 cdsStart=2460112 cdsEnd=2461110 sfCount=1 sfStarts=2460112, sfEnds=2461110,	-	GO:0004672//protein kinase activity;GO:0005524//ATP binding;GO:0004713//protein tyrosine kinase activity;GO:0004674//protein serine/threonine kinase activity;GO:0004675//transmembrane receptor protein serine/threonine kinase activity;GO:0004676//3-phosphoinositide-dependent protein kinase activity;GO:0004677//DNA-dependent protein kinase activity;GO:0004679//AMP-activated protein kinase activity;…	GO:0006468//protein amino acid phosphorylation
716529	40	3	8.87	1	-3.14893	Down	1.64e-06	1.9e-05	jgi|Poptr1_1|716529|estExt_Genewise1_v1.C_LG_V4944|CDS chrom=LG_V strand=+ start=10174060 end=10179917 cdsStart=10174129 cdsEnd=10178784 sfCount=9 sfStarts=10174060,10175474,10175739,10175979,10176255,10176470,10178371,10178925,10179270, sfEnds=10174855,10175653,10175834,10176105,10176387,10178236,10178903,10179173,10179917,	-	-	-
292577	53	4	11.75	1.34	-3.13236	Down	2.82e-08	4.26e-07	jgi|Poptr1_1|292577|gw1.64.229.1|CDS chrom=scaffold_64 strand=- start=449907 end=455107 cdsStart=449907 cdsEnd=455107 sfCount=12 sfStarts=454940,454461,453891,453714,452643,451878,451667,451416,450984,450364,450067,449907, sfEnds=455107,454577,453947,453791,452687,451937,451789,451493,451053,450471,450200,449963,	GO:0000139//Golgi membrane;GO:0016021//integral to membrane	GO:0005351//sugar:hydrogen symporter activity	GO:0008643//carbohydrate transport
731468	53	4	11.75	1.34	-3.13236	Down	2.82e-08	4.26e-07	jgi|Poptr1_1|731468|estExt_Genewise1_v1.C_LG_XIV1950|CDS chrom=LG_XIV strand=+ start=4344710 end=4351655 cdsStart=4345146 cdsEnd=4351354 sfCount=9 sfStarts=4344710,4344784,4345033,4345307,4345626,4349052,4349367,4350393,4350941, sfEnds=4344749,4344793,4345184,4345418,4345687,4349276,4350350,4350809,4351655,	GO:0005634//nucleus	GO:0003677//DNA binding	-
829550	78	6	17.3	2.01	-3.1055	Down	1.39e-11	3.19e-10	jgi|Poptr1_1|829550|estExt_fgenesh4_pm.C_LG_I0526|CDS chrom=LG_I strand=+ start=13104205 end=13106077 cdsStart=13104263 cdsEnd=13106007 sfCount=2 sfStarts=13104205,13105309, sfEnds=13104496,13106077,	GO:0016020//membrane;GO:0005743//mitochondrial inner membrane	GO:0005488//binding;GO:0005215//transporter activity	GO:0006810//transport
570694	128	10	28.39	3.34	-3.08746	Down	3.88e-18	1.79e-16	jgi|Poptr1_1|570694|eugene3.00130058|CDS chrom=LG_XIII strand=+ start=512039 end=515335 cdsStart=512039 cdsEnd=515211 sfCount=6 sfStarts=512039,512694,513042,513861,514461,514885, sfEnds=512212,512853,513253,514354,514509,515335,	-	-	-
1113880	51	4	11.31	1.34	-3.07729	Down	6.79e-08	9.78e-07	jgi|Poptr1_1|1113880|estExt_Genewise1Plus.C_1070154|CDS chrom=scaffold_107 strand=+ start=778459 end=783277 cdsStart=778459 cdsEnd=783033 sfCount=6 sfStarts=778459,779448,780400,781210,781685,782692, sfEnds=778797,779657,780510,781578,781792,783277,	-	-	-
563480	113	9	25.06	3.01	-3.05755	Down	4.96e-16	1.95e-14	jgi|Poptr1_1|563480|eugene3.00080075|CDS chrom=LG_VIII strand=+ start=417694 end=419639 cdsStart=417694 cdsEnd=419639 sfCount=3 sfStarts=417694,418043,419364, sfEnds=417843,419281,419639,	-	-	-
556346	100	8	22.18	2.68	-3.04895	Down	2.67e-14	9.13e-13	jgi|Poptr1_1|556346|eugene3.00041059|CDS chrom=LG_IV strand=+ start=12536285 end=12542435 cdsStart=12536285 cdsEnd=12542414 sfCount=6 sfStarts=12536285,12537740,12537925,12539775,12541030,12542127, sfEnds=12536477,12537795,12538080,12540365,12541332,12542435,	-	GO:0016758//transferase activity, transferring hexosyl groups;GO:0000009//alpha-1,6-mannosyltransferase activity;GO:0000026//alpha-1,2-mannosyltransferase activity;GO:0000030//mannosyltransferase activity;GO:0000033//alpha-1,3-mannosyltransferase activity;GO:0003980//UDP-glucose:glycoprotein glucosyltransferase activity;GO:0004376//glycolipid mannosyltransferase activity;GO:0004576//oligosacchary…	GO:0016051//carbohydrate biosynthetic process
578090	62	5	13.75	1.67	-3.04151	Down	2.87e-09	5.12e-08	jgi|Poptr1_1|578090|eugene3.00180314|CDS chrom=LG_XVIII strand=+ start=4435035 end=4439684 cdsStart=4435035 cdsEnd=4439546 sfCount=8 sfStarts=4435035,4435346,4435590,4436123,4436630,4436840,4438028,4439289, sfEnds=4435135,4435473,4435652,4436244,4436745,4437647,4438759,4439684,	-	GO:0004182	GO:0006508//proteolysis;GO:0006118//electron transport
782855	37	3	8.21	1	-3.03738	Down	6.12e-06	6.22e-05	jgi|Poptr1_1|782855|fgenesh4_pg.C_scaffold_70000203|CDS chrom=scaffold_70 strand=+ start=1366772 end=1368066 cdsStart=1366772 cdsEnd=1368066 sfCount=4 sfStarts=1366772,1367378,1367705,1367931, sfEnds=1367275,1367513,1367780,1368066,	-	-	-
552072	49	4	10.87	1.34	-3.02005	Down	1.62e-07	2.22e-06	jgi|Poptr1_1|552072|eugene3.00021387|CDS chrom=LG_II strand=- start=11210263 end=11212333 cdsStart=11210263 cdsEnd=11212333 sfCount=5 sfStarts=11210263,11210809,11211803,11212010,11212272, sfEnds=11210291,11211178,11211916,11212106,11212333,	-	-	-
824474	48	4	10.64	1.34	-2.98919	Down	2.51e-07	3.35e-06	jgi|Poptr1_1|824474|estExt_fgenesh4_pg.C_LG_XV0004|CDS chrom=LG_XV strand=- start=21545 end=24516 cdsStart=21823 cdsEnd=24516 sfCount=3 sfStarts=21545,22873,23164, sfEnds=22099,23054,24516,	-	-	-
179193	94	8	20.85	2.68	-2.95974	Down	3.57e-13	1.05e-11	jgi|Poptr1_1|179193|gw1.I.7793.1|CDS chrom=LG_I strand=- start=4288821 end=4295975 cdsStart=4288821 cdsEnd=4295975 sfCount=13 sfStarts=4295794,4295603,4294802,4293542,4293292,4293130,4292853,4291736,4290625,4290030,4289668,4289128,4288821, sfEnds=4295975,4295679,4295077,4293605,4293438,4293164,4292926,4292649,4290921,4290509,4289816,4289417,4288955,	-	GO:0005524//ATP binding;GO:0016887//ATPase activity;GO:0000166//nucleotide binding;GO:0017111//nucleoside-triphosphatase activity	-
832111	82	7	18.19	2.34	-2.95857	Down	1.26e-11	2.9e-10	jgi|Poptr1_1|832111|estExt_fgenesh4_pm.C_LG_VI0704|CDS chrom=LG_VI strand=+ start=15753030 end=15767727 cdsStart=15753030 cdsEnd=15767427 sfCount=23 sfStarts=15753030,15755155,15756349,15757542,15759168,15759377,15760239,15760376,15760563,15760981,15761522,15762946,15763463,15763949,15764387,15764647,15765220,15765539,15765929,15766467,15766675,15767083,15767280, sfEnds=15753874,15755270,15756557…	-	-	-
754209	82	7	18.19	2.34	-2.95857	Down	1.26e-11	2.9e-10	jgi|Poptr1_1|754209|fgenesh4_pg.C_LG_II000389|CDS chrom=LG_II strand=- start=2674246 end=2676426 cdsStart=2674246 cdsEnd=2676426 sfCount=7 sfStarts=2674246,2674831,2675044,2675274,2675633,2675877,2676362, sfEnds=2674309,2674932,2675190,2675410,2675782,2676036,2676426,	GO:0016459//myosin complex	GO:0003774//motor activity;GO:0005524//ATP binding	-
203922	35	3	7.76	1	-2.95606	Down	1.46e-05	0.000134947	jgi|Poptr1_1|203922|gw1.IX.4387.1|CDS chrom=LG_IX strand=+ start=9150096 end=9154262 cdsStart=9150096 cdsEnd=9154262 sfCount=2 sfStarts=9150096,9151403, sfEnds=9151231,9154262,	-	-	-
425624	58	5	12.86	1.67	-2.94497	Down	1.62e-08	2.59e-07	jgi|Poptr1_1|425624|gw1.III.2026.1|CDS chrom=LG_III strand=- start=12553247 end=12554782 cdsStart=12553247 cdsEnd=12554782 sfCount=1 sfStarts=12553247, sfEnds=12554782,	-	-	-
820458	46	4	10.2	1.34	-2.92826	Down	5.95e-07	7.49e-06	jgi|Poptr1_1|820458|estExt_fgenesh4_pg.C_LG_VIII0682|CDS chrom=LG_VIII strand=+ start=4920407 end=4927106 cdsStart=4920407 cdsEnd=4926668 sfCount=8 sfStarts=4920407,4922804,4923485,4924260,4924613,4926495,4926819,4927049, sfEnds=4922614,4922998,4923765,4924439,4924790,4926674,4926877,4927106,	-	-	-
819443	103	9	22.84	3.01	-2.92373	Down	3.68e-14	1.23e-12	jgi|Poptr1_1|819443|estExt_fgenesh4_pg.C_LG_VI1454|CDS chrom=LG_VI strand=- start=14498846 end=14503924 cdsStart=14499244 cdsEnd=14502874 sfCount=7 sfStarts=14498846,14499970,14500743,14500917,14502080,14503796,14503861, sfEnds=14499547,14500094,14500813,14501367,14502970,14503828,14503924,	-	GO:0003684//damaged DNA binding;GO:0005524//ATP binding	GO:0006298//mismatch repair
1101561	308	27	68.31	9.03	-2.9193	Down	1.06e-39	1.08e-37	jgi|Poptr1_1|1101561|estExt_Genewise1Plus.C_LG_XV1917|CDS chrom=LG_XV strand=- start=6679496 end=6709181 cdsStart=6679824 cdsEnd=6709181 sfCount=51 sfStarts=6679496,6680632,6680921,6681261,6681497,6681708,6682019,6682192,6682595,6684011,6684158,6684420,6685369,6686234,6686415,6687881,6689127,6689856,6690112,6690328,6690696,6691288,6691545,6691745,6694135,6694362,6694631,6694808,6695851,6696015,66…	-	-	-
824538	205	18	45.46	6.02	-2.91676	Down	7.2e-27	4.85e-25	jgi|Poptr1_1|824538|estExt_fgenesh4_pg.C_LG_XV0172|CDS chrom=LG_XV strand=+ start=1275740 end=1286932 cdsStart=1275740 cdsEnd=1286599 sfCount=22 sfStarts=1275740,1276234,1276743,1276944,1277311,1277493,1278052,1278308,1278541,1278823,1279256,1279424,1280021,1281229,1281671,1281934,1283873,1284188,1284722,1285261,1285787,1286300, sfEnds=1276150,1276353,1276856,1277096,1277411,1277589,1278161,12784…	GO:0009342//glutamate synthase complex (NADPH)	GO:0016491//oxidoreductase activity;GO:0015036//disulfide oxidoreductase activity;GO:0015930//glutamate synthase activity;GO:0016639//oxidoreductase activity, acting on the CH-NH2 group of donors, NAD or NADP as acceptor;GO:0004355//glutamate synthase (NADPH) activity;GO:0045181//glutamate synthase activity, NADH or NADPH as acceptor	GO:0006118//electron transport;GO:0005975//carbohydrate metabolic process;GO:0008152//metabolic process;GO:0006537//glutamate biosynthetic process;GO:0006807//nitrogen compound metabolic process
828666	34	3	7.54	1	-2.91456	Down	2.25e-05	0.000199933	jgi|Poptr1_1|828666|estExt_fgenesh4_pg.C_2000024|CDS chrom=scaffold_200 strand=- start=188968 end=192457 cdsStart=189416 cdsEnd=192457 sfCount=3 sfStarts=188968,190586,192092, sfEnds=189794,191346,192457,	GO:0000151//ubiquitin ligase complex	GO:0004842//ubiquitin-protein ligase activity;GO:0008270//zinc ion binding	GO:0016567//protein ubiquitination
827396	34	3	7.54	1	-2.91456	Down	2.25e-05	0.000199785	jgi|Poptr1_1|827396|estExt_fgenesh4_pg.C_770076|CDS chrom=scaffold_77 strand=- start=954525 end=968593 cdsStart=954831 cdsEnd=968593 sfCount=22 sfStarts=954525,954707,954820,955174,956726,956913,957342,957635,957920,959251,960017,960613,961644,961901,962719,962916,964906,966040,967412,967648,967910,968387, sfEnds=954550,954752,955077,955235,956791,957044,957443,957832,958066,959361,960523,960769,…	-	GO:0003824//catalytic activity;GO:0004630//phospholipase D activity	GO:0008152//metabolic process
815440	56	5	12.42	1.67	-2.89475	Down	3.81e-08	5.68e-07	jgi|Poptr1_1|815440|estExt_fgenesh4_pg.C_LG_I1984|CDS chrom=LG_I strand=+ start=20018251 end=20031648 cdsStart=20018251 cdsEnd=20031425 sfCount=24 sfStarts=20018251,20019552,20020696,20021290,20021711,20021857,20022074,20022361,20022960,20023198,20023338,20024084,20024314,20025033,20026298,20027280,20028241,20028391,20028975,20029207,20029625,20030850,20031240,20031626, sfEnds=20018269,20019589,2…	-	-	-
859165	56	5	12.42	1.67	-2.89475	Down	3.81e-08	5.67e-07	jgi|Poptr1_1|859165|e_gw1.IV.1221.1|CDS chrom=LG_IV strand=+ start=15934716 end=15939640 cdsStart=15934716 cdsEnd=15939640 sfCount=9 sfStarts=15934716,15935688,15936226,15936675,15937427,15938226,15938388,15938660,15939389, sfEnds=15935486,15936141,15936305,15936747,15937932,15938295,15938527,15938968,15939640,	-	-	-
816970	78	7	17.3	2.34	-2.88619	Down	6.97e-11	1.5e-09	jgi|Poptr1_1|816970|estExt_fgenesh4_pg.C_LG_II2536|CDS chrom=LG_II strand=+ start=23675420 end=23682123 cdsStart=23675420 cdsEnd=23681585 sfCount=12 sfStarts=23675420,23676371,23676768,23677348,23677644,23678193,23678969,23679366,23679820,23680520,23680680,23681473, sfEnds=23676241,23676691,23676854,23677541,23678043,23678309,23679263,23679580,23680125,23680583,23680919,23682123,	GO:0016021//integral to membrane	GO:0005524//ATP binding;GO:0042626//ATPase activity, coupled to transmembrane movement of substances;GO:0016887//ATPase activity;GO:0000166//nucleotide binding;GO:0017111//nucleoside-triphosphatase activity	GO:0006810//transport
576764	33	3	7.32	1	-2.87184	Down	3.46e-05	0.000294384	jgi|Poptr1_1|576764|eugene3.00160899|CDS chrom=LG_XVI strand=+ start=8393107 end=8399675 cdsStart=8393107 cdsEnd=8399675 sfCount=12 sfStarts=8393107,8393386,8393669,8393905,8394223,8394417,8396060,8396456,8397207,8398735,8398943,8399493, sfEnds=8393311,8393479,8393711,8394027,8394342,8394495,8396173,8396553,8397297,8398854,8399013,8399675,	-	GO:0005529//sugar binding;GO:0016740//transferase activity	GO:0005975//carbohydrate metabolic process;GO:0051338
826584	33	3	7.32	1	-2.87184	Down	3.46e-05	0.000294177	jgi|Poptr1_1|826584|estExt_fgenesh4_pg.C_290148|CDS chrom=scaffold_29 strand=- start=1600170 end=1612358 cdsStart=1600435 cdsEnd=1612358 sfCount=29 sfStarts=1600170,1600805,1601011,1601538,1601710,1601867,1602439,1602718,1603001,1603944,1604106,1604282,1604697,1605074,1605274,1605451,1606043,1606219,1607677,1607858,1608831,1609298,1609508,1609709,1610063,1610269,1610427,1610670,1611843, sfEnds=16…	-	-	-
727341	44	4	9.76	1.34	-2.86465	Down	1.4e-06	1.64e-05	jgi|Poptr1_1|727341|estExt_Genewise1_v1.C_LG_XI0962|CDS chrom=LG_XI strand=+ start=14515161 end=14525774 cdsStart=14515587 cdsEnd=14525090 sfCount=20 sfStarts=14515161,14516216,14516370,14517028,14517664,14518347,14518667,14519620,14520817,14521072,14521255,14521466,14521992,14522668,14522922,14523507,14524176,14524750,14524955,14525436, sfEnds=14515892,14516278,14516449,14517145,14517738,1451850…	-	-	-
672273	350	32	77.62	10.7	-2.85882	Down	5.09e-44	6.02e-42	jgi|Poptr1_1|672273|grail3.0142001501|CDS chrom=scaffold_142 strand=- start=189350 end=193508 cdsStart=189350 cdsEnd=193238 sfCount=5 sfStarts=189350,190008,190680,191809,192870, sfEnds=189755,190219,190802,192006,193508,	-	GO:0004553//hydrolase activity, hydrolyzing O-glycosyl compounds	GO:0005975//carbohydrate metabolic process
254443	237	22	52.56	7.36	-2.83619	Down	4.82e-30	3.63e-28	jgi|Poptr1_1|254443|gw1.XVI.382.1|CDS chrom=LG_XVI strand=- start=13207178 end=13213943 cdsStart=13207178 cdsEnd=13213943 sfCount=7 sfStarts=13212644,13211855,13210942,13210647,13208491,13207414,13207178, sfEnds=13213943,13212194,13211689,13210770,13208710,13207872,13207322,	GO:0016020//membrane;GO:0016021//integral to membrane	GO:0005524//ATP binding;GO:0015662//ATPase activity, coupled to transmembrane movement of ions, phosphorylative mechanism;GO:0003824//catalytic activity;GO:0016887//ATPase activity;GO:0004012//phospholipid-translocating ATPase activity	GO:0006812//cation transport;GO:0008152//metabolic process
816029	43	4	9.54	1.34	-2.83176	Down	2.15e-06	2.42e-05	jgi|Poptr1_1|816029|estExt_fgenesh4_pg.C_LG_II0244|CDS chrom=LG_II strand=- start=1711184 end=1717894 cdsStart=1711467 cdsEnd=1717798 sfCount=17 sfStarts=1711184,1711884,1712140,1712740,1712923,1713060,1713594,1714179,1714457,1714581,1714720,1715427,1715605,1716032,1717280,1717441,1717600, sfEnds=1711819,1711913,1712173,1712809,1712976,1713182,1713675,1714303,1714480,1714611,1714837,1715478,17157…	-	-	-
706531	43	4	9.54	1.34	-2.83176	Down	2.15e-06	2.42e-05	jgi|Poptr1_1|706531|estExt_Genewise1_v1.C_LG_I2036|CDS chrom=LG_I strand=+ start=20046783 end=20049705 cdsStart=20047600 cdsEnd=20049705 sfCount=5 sfStarts=20046783,20047140,20047480,20047803,20049601, sfEnds=20047040,20047262,20047712,20049531,20049705,	-	-	-
867254	43	4	9.54	1.34	-2.83176	Down	2.15e-06	2.41e-05	jgi|Poptr1_1|867254|e_gw1.VI.1323.1|CDS chrom=LG_VI strand=- start=3209129 end=3215842 cdsStart=3209129 cdsEnd=3215842 sfCount=16 sfStarts=3209129,3209604,3210234,3210936,3211224,3211578,3212005,3212215,3212406,3212711,3213186,3214444,3214640,3214979,3215335,3215663, sfEnds=3209402,3209942,3210487,3211099,3211477,3211766,3212075,3212321,3212579,3212806,3213267,3214527,3214755,3215222,3215481,3215…	-	-	-
575695	43	4	9.54	1.34	-2.83176	Down	2.15e-06	2.41e-05	jgi|Poptr1_1|575695|eugene3.00151090|CDS chrom=LG_XV strand=- start=9483214 end=9486560 cdsStart=9483214 cdsEnd=9486560 sfCount=7 sfStarts=9483214,9483707,9483842,9484163,9484347,9484794,9485499, sfEnds=9483287,9483774,9484095,9484266,9484713,9485015,9486560,	-	GO:0003676//nucleic acid binding;GO:0004003//ATP-dependent DNA helicase activity;GO:0004004//ATP-dependent RNA helicase activity;GO:0008026//ATP-dependent helicase activity;GO:0008094//DNA-dependent ATPase activity;GO:0008186//RNA-dependent ATPase activity;GO:0015462//protein-transmembrane transporting ATPase activity;GO:0015616//DNA translocase activity;GO:0016887//ATPase activity;GO:0017116//si…	-
571863	408	38	90.48	12.71	-2.83163	Down	1.33e-50	1.79e-48	jgi|Poptr1_1|571863|eugene3.00131227|CDS chrom=LG_XIII strand=- start=12302266 end=12304930 cdsStart=12302266 cdsEnd=12304930 sfCount=3 sfStarts=12302266,12303601,12304721, sfEnds=12303483,12304587,12304930,	-	-	-
754083	32	3	7.1	1	-2.82782	Down	5.31e-05	0.000430125	jgi|Poptr1_1|754083|fgenesh4_pg.C_LG_II000263|CDS chrom=LG_II strand=+ start=1873051 end=1879125 cdsStart=1873051 cdsEnd=1879125 sfCount=18 sfStarts=1873051,1873449,1873583,1873804,1874238,1874440,1874701,1875749,1875973,1876171,1876870,1877108,1877351,1877851,1878126,1878299,1878764,1878921, sfEnds=1873164,1873493,1873702,1873911,1874348,1874613,1874838,1875856,1876080,1876319,1877023,1877268,18…	GO:0016020//membrane	GO:0003936;GO:0046933//hydrogen ion transporting ATP synthase activity, rotational mechanism;GO:0046961//proton-transporting ATPase activity, rotational mechanism	GO:0015992//proton transport
1102823	32	3	7.1	1	-2.82782	Down	5.31e-05	0.000429836	jgi|Poptr1_1|1102823|estExt_Genewise1Plus.C_LG_XVI0497|CDS chrom=LG_XVI strand=- start=1422822 end=1426845 cdsStart=1422822 cdsEnd=1426611 sfCount=4 sfStarts=1422822,1423989,1424440,1426347, sfEnds=1423565,1424360,1424552,1426845,	-	-	-
817505	64	6	14.19	2.01	-2.81961	Down	5.8e-09	9.95e-08	jgi|Poptr1_1|817505|estExt_fgenesh4_pg.C_LG_III1345|CDS chrom=LG_III strand=+ start=14519115 end=14523637 cdsStart=14519115 cdsEnd=14523294 sfCount=9 sfStarts=14519115,14520351,14521256,14521818,14522013,14522154,14522347,14522643,14523001, sfEnds=14519555,14520883,14521381,14521917,14522074,14522256,14522494,14522857,14523637,	GO:0000151//ubiquitin ligase complex	GO:0004842//ubiquitin-protein ligase activity;GO:0008270//zinc ion binding;GO:0003677//DNA binding	GO:0016567//protein ubiquitination;GO:0006355//regulation of transcription, DNA-dependent
670714	42	4	9.31	1.34	-2.79655	Down	3.29e-06	3.56e-05	jgi|Poptr1_1|670714|grail3.0122002801|CDS chrom=scaffold_122 strand=+ start=314232 end=320933 cdsStart=315826 cdsEnd=320720 sfCount=21 sfStarts=314232,315077,315483,315714,315970,316253,316452,316671,317245,317448,318054,318278,318854,319226,319461,319598,319771,319995,320150,320373,320503, sfEnds=314410,315385,315634,315847,316079,316359,316590,316787,317352,317519,318176,318443,319113,319368,31…	-	-	-
248775	42	4	9.31	1.34	-2.79655	Down	3.29e-06	3.55e-05	jgi|Poptr1_1|248775|gw1.XIX.1175.1|CDS chrom=LG_XIX strand=+ start=5691843 end=5700247 cdsStart=5691843 cdsEnd=5700247 sfCount=14 sfStarts=5691843,5692498,5693072,5694075,5694314,5694523,5695804,5696078,5696459,5696753,5698919,5699312,5699942,5700139, sfEnds=5691942,5692699,5693156,5694215,5694432,5694619,5695976,5696144,5696617,5696924,5699027,5699424,5700017,5700247,	GO:0016020//membrane	GO:0005279	GO:0006865//amino acid transport;GO:0006810//transport
817330	31	3	6.87	1	-2.78031	Down	8.13e-05	0.000630516	jgi|Poptr1_1|817330|estExt_fgenesh4_pg.C_LG_III0979|CDS chrom=LG_III strand=- start=11515045 end=11520663 cdsStart=11515045 cdsEnd=11520663 sfCount=10 sfStarts=11515045,11515821,11516086,11516924,11517799,11518536,11519133,11519369,11519936,11520611, sfEnds=11515283,11515954,11516276,11517108,11518100,11518987,11519240,11519680,11520056,11520663,	-	-	-
1110979	41	4	9.09	1.34	-2.76205	Down	5.02e-06	5.24e-05	jgi|Poptr1_1|1110979|estExt_Genewise1Plus.C_410649|CDS chrom=scaffold_41 strand=+ start=2469393 end=2481800 cdsStart=2469393 cdsEnd=2481800 sfCount=21 sfStarts=2469393,2469994,2470578,2471304,2471712,2471884,2472669,2473140,2474385,2476498,2476658,2477260,2477415,2477744,2477938,2478405,2478605,2479445,2479706,2480963,2481560, sfEnds=2469594,2470094,2470772,2471459,2471783,2472036,2472719,2473310…	-	-	-
591719	41	4	9.09	1.34	-2.76205	Down	5.02e-06	5.24e-05	jgi|Poptr1_1|591719|eugene3.00400064|CDS chrom=scaffold_40 strand=- start=492835 end=494171 cdsStart=492835 cdsEnd=494171 sfCount=3 sfStarts=492835,493517,493981, sfEnds=493302,493769,494171,	-	-	-
278745	51	5	11.31	1.67	-2.75968	Down	3.18e-07	4.18e-06	jgi|Poptr1_1|278745|gw1.210.58.1|CDS chrom=scaffold_210 strand=- start=199648 end=205854 cdsStart=199648 cdsEnd=205854 sfCount=11 sfStarts=205624,204788,204055,203815,203448,202956,202065,200772,200086,199924,199648, sfEnds=205854,204979,204156,203892,203529,203118,202394,200990,200684,199989,199827,	GO:0005875//microtubule associated complex	GO:0003777//microtubule motor activity;GO:0005524//ATP binding;GO:0008574//plus-end-directed microtubule motor activity	GO:0007018//microtubule-based movement
1100582	51	5	11.31	1.67	-2.75968	Down	3.18e-07	4.17e-06	jgi|Poptr1_1|1100582|estExt_Genewise1Plus.C_LG_XV0150|CDS chrom=LG_XV strand=- start=336058 end=339469 cdsStart=336257 cdsEnd=339469 sfCount=6 sfStarts=336058,336954,337931,338098,338442,339237, sfEnds=336717,337035,338014,338274,338574,339469,	-	-	-
640107	61	6	13.53	2.01	-2.75089	Down	2.05e-08	3.23e-07	jgi|Poptr1_1|640107|grail3.0008016301|CDS chrom=LG_I strand=+ start=4827006 end=4829243 cdsStart=4827092 cdsEnd=4828975 sfCount=5 sfStarts=4827006,4827916,4828109,4828408,4828817, sfEnds=4827654,4828000,4828177,4828587,4829243,	-	-	-
914964	61	6	13.53	2.01	-2.75089	Down	2.05e-08	3.23e-07	jgi|Poptr1_1|914964|e_gw1.XIX.860.1|CDS chrom=LG_XIX strand=+ start=4065135 end=4071385 cdsStart=4065135 cdsEnd=4071385 sfCount=8 sfStarts=4065135,4065967,4067492,4068310,4068490,4068695,4070309,4070792, sfEnds=4065674,4067356,4067803,4068414,4068577,4068816,4070373,4071385,	-	-	-
561745	101	10	22.4	3.34	-2.74558	Down	3.93e-13	1.15e-11	jgi|Poptr1_1|561745|eugene3.00061704|CDS chrom=LG_VI strand=+ start=16024847 end=16025572 cdsStart=16024847 cdsEnd=16025572 sfCount=1 sfStarts=16024847, sfEnds=16025572,	GO:0000151//ubiquitin ligase complex	GO:0004842//ubiquitin-protein ligase activity;GO:0008270//zinc ion binding	GO:0016567//protein ubiquitination
592804	81	8	17.96	2.68	-2.74448	Down	8.85e-11	1.89e-09	jgi|Poptr1_1|592804|eugene3.00440139|CDS chrom=scaffold_44 strand=+ start=1691712 end=1696981 cdsStart=1691712 cdsEnd=1696686 sfCount=10 sfStarts=1691712,1693635,1693903,1694266,1694447,1694626,1694976,1695495,1695727,1696012, sfEnds=1693528,1693745,1694179,1694354,1694534,1694835,1695101,1695593,1695918,1696981,	GO:0016020//membrane;GO:0016021//integral to membrane	GO:0005524//ATP binding;GO:0015662//ATPase activity, coupled to transmembrane movement of ions, phosphorylative mechanism;GO:0016887//ATPase activity;GO:0004012//phospholipid-translocating ATPase activity	GO:0006812//cation transport
758739	30	3	6.65	1	-2.73335	Down	0.000124175	0.000919798	jgi|Poptr1_1|758739|fgenesh4_pg.C_LG_IV000367|CDS chrom=LG_IV strand=- start=3312002 end=3315493 cdsStart=3312002 cdsEnd=3315493 sfCount=3 sfStarts=3312002,3313173,3313518, sfEnds=3312301,3313446,3315493,	-	GO:0003825//alpha,alpha-trehalose-phosphate synthase (UDP-forming) activity;GO:0004805//trehalose-phosphatase activity;GO:0003824//catalytic activity	GO:0005992//trehalose biosynthetic process;GO:0008152//metabolic process
737629	30	3	6.65	1	-2.73335	Down	0.000124175	0.000919233	jgi|Poptr1_1|737629|estExt_Genewise1_v1.C_LG_XVIII2468|CDS chrom=LG_XVIII strand=+ start=8515519 end=8518326 cdsStart=8515664 cdsEnd=8518149 sfCount=9 sfStarts=8515519,8515814,8515971,8516223,8516569,8516801,8516983,8517835,8518039, sfEnds=8515723,8515870,8516068,8516292,8516617,8516889,8517030,8517894,8518326,	-	GO:0008757//S-adenosylmethionine-dependent methyltransferase activity;GO:0003677//DNA binding;GO:0008170//N-methyltransferase activity	GO:0006306//DNA methylation
785809	30	3	6.65	1	-2.73335	Down	0.000124175	0.000918669	jgi|Poptr1_1|785809|fgenesh4_pg.C_scaffold_155000030|CDS chrom=scaffold_155 strand=+ start=303410 end=313237 cdsStart=303410 cdsEnd=313237 sfCount=10 sfStarts=303410,304768,306086,306592,307407,308288,308578,309625,311258,313109, sfEnds=303936,305310,306227,306768,307619,308473,308737,309820,311390,313237,	-	-	-
830129	30	3	6.65	1	-2.73335	Down	0.000124175	0.000918106	jgi|Poptr1_1|830129|estExt_fgenesh4_pm.C_LG_II0279|CDS chrom=LG_II strand=+ start=3962235 end=3965470 cdsStart=3962235 cdsEnd=3965126 sfCount=7 sfStarts=3962235,3962996,3963229,3963603,3963858,3964107,3965001, sfEnds=3962896,3963100,3963351,3963773,3963987,3964316,3965470,	-	GO:0004672//protein kinase activity;GO:0005524//ATP binding;GO:0004713//protein tyrosine kinase activity;GO:0004674//protein serine/threonine kinase activity	GO:0006468//protein amino acid phosphorylation
819432	128	13	28.39	4.35	-2.7063	Down	4.17e-16	1.66e-14	jgi|Poptr1_1|819432|estExt_fgenesh4_pg.C_LG_VI1432|CDS chrom=LG_VI strand=- start=14324926 end=14334480 cdsStart=14324928 cdsEnd=14334480 sfCount=23 sfStarts=14324926,14325369,14325715,14326461,14327069,14327327,14327571,14328621,14329286,14330851,14331104,14331347,14331672,14331866,14332112,14332336,14332490,14332795,14332952,14333096,14333501,14333953,14334331, sfEnds=14324969,14325618,14325881…	-	-	-
1078405	59	6	13.08	2.01	-2.7021	Down	4.74e-08	6.93e-07	jgi|Poptr1_1|1078405|estExt_Genewise1Plus.C_LG_V2737|CDS chrom=LG_V strand=- start=10970951 end=10975189 cdsStart=10971359 cdsEnd=10975189 sfCount=11 sfStarts=10970951,10971154,10971214,10971355,10972253,10972431,10972667,10972952,10973252,10973685,10973991, sfEnds=10971110,10971178,10971258,10971668,10972346,10972561,10972860,10973062,10973417,10973849,10975189,	-	-	-
837090	98	10	21.73	3.34	-2.70177	Down	1.37e-12	3.59e-11	jgi|Poptr1_1|837090|estExt_fgenesh4_pm.C_1270030|CDS chrom=scaffold_127 strand=- start=464417 end=466639 cdsStart=464417 cdsEnd=466639 sfCount=12 sfStarts=464417,464575,464764,464925,465097,465288,465476,465671,465895,466067,466364,466554, sfEnds=464470,464667,464834,464994,465174,465389,465532,465799,465966,466207,466487,466639,	-	GO:0004805//trehalose-phosphatase activity;GO:0003824//catalytic activity	GO:0005992//trehalose biosynthetic process;GO:0008152//metabolic process
927892	194	20	43.02	6.69	-2.68493	Down	1.49e-23	8.9e-22	jgi|Poptr1_1|927892|e_gw1.133.165.1|CDS chrom=scaffold_133 strand=- start=500232 end=505889 cdsStart=500232 cdsEnd=505889 sfCount=16 sfStarts=500232,501127,501530,501780,502145,502412,502670,502856,503132,503307,503971,504179,504329,504687,504918,505757, sfEnds=500714,501306,501693,502033,502301,502577,502776,503032,503227,503388,504039,504250,504565,504830,505084,505889,	-	-	-
570851	77	8	17.08	2.68	-2.672	Down	4.67e-10	9.27e-09	jgi|Poptr1_1|570851|eugene3.00130215|CDS chrom=LG_XIII strand=- start=1551708 end=1558578 cdsStart=1551708 cdsEnd=1558578 sfCount=11 sfStarts=1551708,1552406,1552854,1553312,1553970,1554121,1554924,1555093,1556161,1557327,1557763, sfEnds=1551820,1552750,1553070,1553476,1554029,1554606,1554989,1555401,1556430,1557563,1558578,	-	-	-
801939	48	5	10.64	1.67	-2.67158	Down	1.12e-06	1.33e-05	jgi|Poptr1_1|801939|fgenesh4_pm.C_LG_VI000286|CDS chrom=LG_VI strand=- start=5705048 end=5707493 cdsStart=5705048 cdsEnd=5707493 sfCount=7 sfStarts=5705048,5705428,5706232,5706377,5706592,5706803,5707000, sfEnds=5705122,5705496,5706233,5706458,5706658,5706907,5707493,	-	-	-
836224	105	11	23.29	3.68	-2.66193	Down	3.17e-13	9.39e-12	jgi|Poptr1_1|836224|estExt_fgenesh4_pm.C_280080|CDS chrom=scaffold_28 strand=+ start=1986851 end=1996291 cdsStart=1986851 cdsEnd=1995771 sfCount=11 sfStarts=1986851,1988008,1988233,1988421,1990511,1990815,1992952,1993904,1995674,1995948,1996270, sfEnds=1987099,1988094,1988343,1988633,1990696,1992894,1993538,1994225,1995928,1996246,1996291,	GO:0016020//membrane	GO:0005215//transporter activity	GO:0006810//transport
256636	124	13	27.5	4.35	-2.66034	Down	2.18e-15	7.93e-14	jgi|Poptr1_1|256636|gw1.XVI.2575.1|CDS chrom=LG_XVI strand=+ start=6153588 end=6154859 cdsStart=6153588 cdsEnd=6154859 sfCount=1 sfStarts=6153588, sfEnds=6154859,	GO:0016021//integral to membrane	-	-
419601	95	10	21.07	3.34	-2.65727	Down	4.72e-12	1.14e-10	jgi|Poptr1_1|419601|gw1.II.235.1|CDS chrom=LG_II strand=- start=23320510 end=23323225 cdsStart=23320510 cdsEnd=23323225 sfCount=7 sfStarts=23322988,23321624,23321446,23321263,23320998,23320779,23320510, sfEnds=23323225,23322939,23321538,23321363,23321044,23320855,23320650,	-	-	-
555053	95	10	21.07	3.34	-2.65727	Down	4.72e-12	1.14e-10	jgi|Poptr1_1|555053|eugene3.00031686|CDS chrom=LG_III strand=- start=17475572 end=17479687 cdsStart=17475572 cdsEnd=17479687 sfCount=8 sfStarts=17475572,17475982,17476155,17476837,17477121,17477499,17477973,17478519, sfEnds=17475857,17476060,17476348,17477030,17477237,17477664,17478140,17479687,	-	GO:0004197//cysteine-type endopeptidase activity;GO:0016308//1-phosphatidylinositol-4-phosphate 5-kinase activity	GO:0006508//proteolysis
1098087	38	4	8.43	1.34	-2.6533	Down	1.77e-05	0.000159	jgi|Poptr1_1|1098087|estExt_Genewise1Plus.C_LG_XIV0523|CDS chrom=LG_XIV strand=- start=1790847 end=1798125 cdsStart=1791307 cdsEnd=1798125 sfCount=15 sfStarts=1790847,1791061,1791554,1791698,1792786,1793534,1794379,1795245,1795848,1796139,1796303,1796453,1796947,1797121,1797686, sfEnds=1790865,1791477,1791601,1791808,1792836,1793600,1794449,1795289,1795943,1796207,1796366,1796616,1797006,1797301,…	-	-	-
577016	38	4	8.43	1.34	-2.6533	Down	1.77e-05	0.000158881	jgi|Poptr1_1|577016|eugene3.00161151|CDS chrom=LG_XVI strand=+ start=11504446 end=11509821 cdsStart=11504647 cdsEnd=11509821 sfCount=7 sfStarts=11504446,11506076,11507201,11507418,11507615,11508627,11509354, sfEnds=11505966,11506265,11507304,11507520,11507925,11508932,11509821,	-	GO:0003723//RNA binding	-
648629	38	4	8.43	1.34	-2.6533	Down	1.77e-05	0.000158763	jgi|Poptr1_1|648629|grail3.0045006402|CDS chrom=LG_IV strand=- start=14686886 end=14691985 cdsStart=14687907 cdsEnd=14691186 sfCount=13 sfStarts=14686886,14687827,14687907,14688117,14688796,14688994,14689250,14689424,14689852,14690098,14690263,14690756,14691819, sfEnds=14687252,14687900,14688017,14688223,14688919,14689159,14689324,14689485,14689917,14690142,14690662,14691273,14691985,	-	GO:0004799//thymidylate synthase activity;GO:0004146//dihydrofolate reductase activity	GO:0006231//dTMP biosynthetic process;GO:0006545//glycine biosynthetic process;GO:0009165//nucleotide biosynthetic process
651062	57	6	12.64	2.01	-2.65273	Down	1.09e-07	1.53e-06	jgi|Poptr1_1|651062|grail3.0027004701|CDS chrom=LG_V strand=+ start=4809742 end=4811378 cdsStart=4809882 cdsEnd=4811378 sfCount=3 sfStarts=4809742,4810126,4810728, sfEnds=4810014,4810433,4811378,	-	-	-
1074835	66	7	14.64	2.34	-2.64534	Down	1.07e-08	1.78e-07	jgi|Poptr1_1|1074835|estExt_Genewise1Plus.C_LG_IV0142|CDS chrom=LG_IV strand=- start=459794 end=464875 cdsStart=460056 cdsEnd=464875 sfCount=9 sfStarts=459794,460780,461001,461213,462200,462769,462976,463213,463706, sfEnds=460140,460910,461129,461362,462386,462881,463071,463425,464875,	-	-	-
551244	113	12	25.06	4.01	-2.64371	Down	4.86e-14	1.61e-12	jgi|Poptr1_1|551244|eugene3.00020559|CDS chrom=LG_II strand=+ start=4002840 end=4010953 cdsStart=4002840 cdsEnd=4010953 sfCount=10 sfStarts=4002840,4003788,4004312,4004549,4005853,4007943,4008354,4009316,4009999,4010621, sfEnds=4003017,4003831,4004438,4004660,4006547,4008276,4008633,4009477,4010460,4010953,	-	GO:0004869//cysteine-type endopeptidase inhibitor activity	-
591902	47	5	10.42	1.67	-2.64144	Down	1.69e-06	1.94e-05	jgi|Poptr1_1|591902|eugene3.00400247|CDS chrom=scaffold_40 strand=- start=1831113 end=1833981 cdsStart=1831113 cdsEnd=1833981 sfCount=4 sfStarts=1831113,1831174,1831769,1833247, sfEnds=1831123,1831609,1832929,1833981,	-	-	-
726443	56	6	12.42	2.01	-2.6274	Down	1.64e-07	2.25e-06	jgi|Poptr1_1|726443|estExt_Genewise1_v1.C_LG_X5603|CDS chrom=LG_X strand=+ start=8605367 end=8606988 cdsStart=8605642 cdsEnd=8606521 sfCount=4 sfStarts=8605367,8605979,8606266,8606461, sfEnds=8605853,8606184,8606365,8606988,	-	-	-
254922	65	7	14.42	2.34	-2.62349	Down	1.62e-08	2.59e-07	jgi|Poptr1_1|254922|gw1.XVI.861.1|CDS chrom=LG_XVI strand=+ start=987709 end=994320 cdsStart=987709 cdsEnd=994320 sfCount=5 sfStarts=987709,988727,990034,991374,992289, sfEnds=987760,988869,990090,991449,994320,	-	-	-
727970	54	6	11.98	2.01	-2.57536	Down	3.74e-07	4.87e-06	jgi|Poptr1_1|727970|estExt_Genewise1_v1.C_LG_XI2808|CDS chrom=LG_XI strand=- start=6570503 end=6570718 cdsStart=6570503 cdsEnd=6570688 sfCount=1 sfStarts=6570503, sfEnds=6570718,	-	-	-
593806	36	4	7.98	1.34	-2.57416	Down	4.04e-05	0.000339833	jgi|Poptr1_1|593806|eugene3.00570050|CDS chrom=scaffold_57 strand=+ start=379718 end=386463 cdsStart=379718 cdsEnd=386201 sfCount=6 sfStarts=379718,381633,382244,382509,385573,385872, sfEnds=380185,382170,382397,382599,385644,386463,	-	-	-
589396	36	4	7.98	1.34	-2.57416	Down	4.04e-05	0.000339597	jgi|Poptr1_1|589396|eugene3.00280132|CDS chrom=scaffold_28 strand=+ start=1452487 end=1458753 cdsStart=1452487 cdsEnd=1458753 sfCount=8 sfStarts=1452487,1453018,1453289,1454255,1454423,1456009,1456252,1457107, sfEnds=1452607,1453212,1453546,1454331,1454491,1456174,1456910,1458753,	-	-	-
909522	36	4	7.98	1.34	-2.57416	Down	4.04e-05	0.00033936	jgi|Poptr1_1|909522|e_gw1.XVIII.564.1|CDS chrom=LG_XVIII strand=+ start=396548 end=403902 cdsStart=396548 cdsEnd=403902 sfCount=15 sfStarts=396548,396809,397164,397481,397943,398316,398934,399227,399486,399966,401112,401331,403124,403320,403807, sfEnds=396691,397000,397217,397569,398216,398372,398965,399362,399659,400526,401249,401429,403224,403410,403902,	-	-	-
582752	134	15	29.72	5.02	-2.56567	Down	5.96e-16	2.33e-14	jgi|Poptr1_1|582752|eugene3.01420059|CDS chrom=scaffold_142 strand=+ start=412057 end=422787 cdsStart=412057 cdsEnd=422787 sfCount=18 sfStarts=412057,413504,413702,414279,414863,415105,416097,416362,417130,417254,418858,419917,420146,420970,421494,421970,422488,422665, sfEnds=412251,413554,413799,414354,414991,415151,416220,416478,417159,417353,418964,420060,420250,421116,421547,422033,422549,422…	-	-	-
753829	71	8	15.75	2.68	-2.55505	Down	5.48e-09	9.45e-08	jgi|Poptr1_1|753829|fgenesh4_pg.C_LG_II000009|CDS chrom=LG_II strand=+ start=69963 end=76718 cdsStart=69963 cdsEnd=76718 sfCount=17 sfStarts=69963,70289,70953,71163,71571,71977,72420,73045,73614,73824,74507,74783,75433,75578,75963,76223,76599, sfEnds=70144,70823,71069,71477,71891,72291,72920,73516,73739,74407,74629,74863,75486,75729,76016,76343,76718,	-	GO:0016491//oxidoreductase activity	GO:0008152//metabolic process
861288	88	10	19.52	3.34	-2.54703	Down	8.24e-11	1.77e-09	jgi|Poptr1_1|861288|e_gw1.V.2586.1|CDS chrom=LG_V strand=- start=627717 end=628649 cdsStart=627717 cdsEnd=628649 sfCount=2 sfStarts=627717,627812, sfEnds=627763,628649,	-	-	-
734840	44	5	9.76	1.67	-2.54703	Down	5.8e-06	5.94e-05	jgi|Poptr1_1|734840|estExt_Genewise1_v1.C_LG_XVI1396|CDS chrom=LG_XVI strand=+ start=2557704 end=2562892 cdsStart=2557819 cdsEnd=2562353 sfCount=11 sfStarts=2557704,2558936,2559244,2559900,2560101,2560403,2560592,2561114,2561565,2561888,2562108, sfEnds=2558151,2559085,2559296,2560008,2560235,2560447,2560779,2561255,2561611,2561975,2562892,	-	-	-
281696	105	12	23.29	4.01	-2.53804	Down	1.26e-12	3.34e-11	jgi|Poptr1_1|281696|gw1.28.270.1|CDS chrom=scaffold_28 strand=- start=995287 end=1007083 cdsStart=995287 cdsEnd=1007083 sfCount=14 sfStarts=1007051,1006530,1006283,1005050,1004827,1003335,1003158,1002811,1002603,1001658,1000736,1000284,999624,995287, sfEnds=1007083,1006734,1006448,1005272,1004903,1003522,1003255,1002947,1002707,1001982,1000857,1000397,999898,995369,	-	-	-
816334	35	4	7.76	1.34	-2.53382	Down	6.09e-05	0.000488531	jgi|Poptr1_1|816334|estExt_fgenesh4_pg.C_LG_II0855|CDS chrom=LG_II strand=+ start=6701143 end=6703413 cdsStart=6701257 cdsEnd=6703413 sfCount=5 sfStarts=6701143,6701618,6702593,6702902,6703384, sfEnds=6701523,6702207,6702676,6703046,6703413,	-	GO:0016787//hydrolase activity	-
755066	35	4	7.76	1.34	-2.53382	Down	6.09e-05	0.000488206	jgi|Poptr1_1|755066|fgenesh4_pg.C_LG_II001246|CDS chrom=LG_II strand=- start=10200835 end=10204794 cdsStart=10200835 cdsEnd=10204794 sfCount=8 sfStarts=10200835,10201096,10201918,10202512,10202770,10203101,10203401,10204542, sfEnds=10200978,10201185,10202154,10202688,10202994,10203295,10203813,10204794,	GO:0005622//intracellular;GO:0005840//ribosome;GO:0016020//membrane	GO:0003735//structural constituent of ribosome;GO:0005279	GO:0006412//translation;GO:0006865//amino acid transport;GO:0006810//transport
577087	322	37	71.41	12.37	-2.52928	Down	7.29e-36	6.81e-34	jgi|Poptr1_1|577087|eugene3.00161222|CDS chrom=LG_XVI strand=- start=12181416 end=12183943 cdsStart=12181416 cdsEnd=12183943 sfCount=3 sfStarts=12181416,12182656,12183800, sfEnds=12182543,12183654,12183943,	-	GO:0005509//calcium ion binding	-
568802	52	6	11.53	2.01	-2.52013	Down	8.45e-07	1.03e-05	jgi|Poptr1_1|568802|eugene3.00110816|CDS chrom=LG_XI strand=- start=10453972 end=10458605 cdsStart=10454200 cdsEnd=10458605 sfCount=6 sfStarts=10453972,10454843,10455027,10455350,10456605,10457739, sfEnds=10454346,10454935,10455158,10455946,10456703,10458605,	-	-	-
658522	52	6	11.53	2.01	-2.52013	Down	8.45e-07	1.03e-05	jgi|Poptr1_1|658522|grail3.0006001101|CDS chrom=LG_X strand=- start=9595626 end=9597259 cdsStart=9596160 cdsEnd=9597248 sfCount=1 sfStarts=9595626, sfEnds=9597259,	-	-	-
203284	112	13	24.84	4.35	-2.51358	Down	2.87e-13	8.58e-12	jgi|Poptr1_1|203284|gw1.IX.3749.1|CDS chrom=LG_IX strand=- start=7680527 end=7682542 cdsStart=7680527 cdsEnd=7682542 sfCount=6 sfStarts=7682474,7682304,7681420,7681231,7681067,7680527, sfEnds=7682542,7682360,7681487,7681337,7681137,7680646,	-	GO:0003684//damaged DNA binding;GO:0005524//ATP binding	GO:0006298//mismatch repair
254726	94	11	20.85	3.68	-2.50227	Down	2.79e-11	6.27e-10	jgi|Poptr1_1|254726|gw1.XVI.665.1|CDS chrom=LG_XVI strand=+ start=253304 end=255692 cdsStart=253304 cdsEnd=255692 sfCount=2 sfStarts=253304,254485, sfEnds=253525,255692,	-	GO:0003676//nucleic acid binding	-
277973	51	6	11.31	2.01	-2.49233	Down	1.27e-06	1.5e-05	jgi|Poptr1_1|277973|gw1.202.15.1|CDS chrom=scaffold_202 strand=+ start=66977 end=71279 cdsStart=66977 cdsEnd=71279 sfCount=11 sfStarts=66977,67132,67735,68293,69016,69444,69982,70395,70589,70804,71226, sfEnds=67057,67638,67959,68454,69289,69810,70094,70482,70692,70995,71279,	GO:0005634//nucleus	GO:0005529//sugar binding;GO:0003677//DNA binding	-
275141	34	4	7.54	1.34	-2.49233	Down	9.16e-05	0.00070165	jgi|Poptr1_1|275141|gw1.170.53.1|CDS chrom=scaffold_170 strand=+ start=75929 end=80032 cdsStart=75929 cdsEnd=80032 sfCount=4 sfStarts=75929,76061,78218,79247, sfEnds=76024,76407,78650,80032,	-	-	-
555074	34	4	7.54	1.34	-2.49233	Down	9.16e-05	0.000701205	jgi|Poptr1_1|555074|eugene3.00031707|CDS chrom=LG_III strand=+ start=17599091 end=17601799 cdsStart=17599091 cdsEnd=17601799 sfCount=4 sfStarts=17599091,17599332,17600456,17601637, sfEnds=17599243,17600318,17601381,17601799,	-	-	-
668368	42	5	9.31	1.67	-2.47893	Down	1.31e-05	0.000122306	jgi|Poptr1_1|668368|grail3.0078005501|CDS chrom=LG_XVII strand=+ start=1486601 end=1488069 cdsStart=1486650 cdsEnd=1488053 sfCount=1 sfStarts=1486601, sfEnds=1488069,	-	-	-
558791	67	8	14.86	2.68	-2.47113	Down	2.76e-08	4.19e-07	jgi|Poptr1_1|558791|eugene3.00050406|CDS chrom=LG_V strand=+ start=3537895 end=3545339 cdsStart=3537895 cdsEnd=3545339 sfCount=12 sfStarts=3537895,3539453,3541065,3541387,3541806,3542755,3542924,3543130,3543279,3544462,3544694,3545213, sfEnds=3538026,3540608,3541283,3541607,3541880,3542826,3543022,3543201,3543393,3544530,3545027,3545339,	-	GO:0005509//calcium ion binding;GO:0004535//poly(A)-specific ribonuclease activity	-
752412	50	6	11.09	2.01	-2.46399	Down	1.9e-06	2.16e-05	jgi|Poptr1_1|752412|fgenesh4_pg.C_LG_I002015|CDS chrom=LG_I strand=+ start=20199100 end=20203301 cdsStart=20199100 cdsEnd=20203301 sfCount=7 sfStarts=20199100,20200318,20201111,20201667,20201909,20202626,20203168, sfEnds=20199733,20200397,20201569,20201753,20202003,20202750,20203301,	GO:0005634//nucleus	GO:0003677//DNA binding;GO:0003700//transcription factor activity	GO:0006355//regulation of transcription, DNA-dependent
820312	83	10	18.41	3.34	-2.46257	Down	6.16e-10	1.21e-08	jgi|Poptr1_1|820312|estExt_fgenesh4_pg.C_LG_VIII0404|CDS chrom=LG_VIII strand=+ start=2708664 end=2715788 cdsStart=2708664 cdsEnd=2715788 sfCount=12 sfStarts=2708664,2709847,2710743,2711639,2711845,2712558,2713405,2713699,2714410,2714637,2715042,2715555, sfEnds=2709740,2709985,2710933,2711746,2712048,2712789,2713554,2713855,2714537,2714959,2715230,2715788,	GO:0005622//intracellular;GO:0030127//COPII vesicle coat	GO:0003700//transcription factor activity;GO:0005515//protein binding	GO:0006355//regulation of transcription, DNA-dependent;GO:0006886//intracellular protein transport;GO:0006888//ER to Golgi vesicle-mediated transport
817748	157	19	34.82	6.35	-2.45509	Down	1.22e-17	5.39e-16	jgi|Poptr1_1|817748|estExt_fgenesh4_pg.C_LG_IV0208|CDS chrom=LG_IV strand=- start=1808769 end=1812492 cdsStart=1808769 cdsEnd=1812492 sfCount=5 sfStarts=1808769,1809580,1810251,1810642,1812470, sfEnds=1808888,1809735,1810520,1811980,1812492,	-	-	-
664908	66	8	14.64	2.68	-2.44961	Down	4.11e-08	6.08e-07	jgi|Poptr1_1|664908|grail3.0012034401|CDS chrom=LG_XIV strand=+ start=9587070 end=9589080 cdsStart=9587136 cdsEnd=9588968 sfCount=2 sfStarts=9587070,9588669, sfEnds=9587555,9589080,	-	-	-
550538	33	4	7.32	1.34	-2.44961	Down	0.000137479	0.000999914	jgi|Poptr1_1|550538|eugene3.00012979|CDS chrom=LG_I strand=- start=34307056 end=34313242 cdsStart=34307533 cdsEnd=34313242 sfCount=5 sfStarts=34307056,34310437,34311419,34312492,34313191, sfEnds=34309616,34310500,34311475,34312634,34313242,	-	-	-
230554	66	8	14.64	2.68	-2.44961	Down	4.11e-08	6.07e-07	jgi|Poptr1_1|230554|gw1.X.5251.1|CDS chrom=LG_X strand=+ start=7135051 end=7141122 cdsStart=7135051 cdsEnd=7141122 sfCount=7 sfStarts=7135051,7135261,7135798,7135983,7136960,7138264,7140992, sfEnds=7135184,7135576,7135893,7136051,7137088,7138363,7141122,	-	GO:0004749//ribose phosphate diphosphokinase activity	GO:0009116//nucleoside metabolic process;GO:0009165//nucleotide biosynthetic process
578521	66	8	14.64	2.68	-2.44961	Down	4.11e-08	6.06e-07	jgi|Poptr1_1|578521|eugene3.00180745|CDS chrom=LG_XVIII strand=- start=8723453 end=8732920 cdsStart=8723453 cdsEnd=8732920 sfCount=22 sfStarts=8723453,8723812,8723987,8724232,8724431,8725587,8726700,8727038,8727257,8727426,8727949,8728807,8729397,8730524,8730718,8730986,8731531,8731670,8731957,8732138,8732297,8732795, sfEnds=8723560,8723899,8724066,8724329,8724617,8725733,8726930,8727163,8727337,…	GO:0016020//membrane	GO:0004576//oligosaccharyl transferase activity;GO:0004579//dolichyl-diphosphooligosaccharide-protein glycotransferase activity	GO:0006486//protein amino acid glycosylation
571307	33	4	7.32	1.34	-2.44961	Down	0.000137479	0.000999311	jgi|Poptr1_1|571307|eugene3.00130671|CDS chrom=LG_XIII strand=+ start=5457575 end=5462977 cdsStart=5457575 cdsEnd=5462977 sfCount=2 sfStarts=5457575,5461607, sfEnds=5461189,5462977,	-	-	-
581262	107	13	23.73	4.35	-2.44762	Down	2.12e-12	5.42e-11	jgi|Poptr1_1|581262|eugene3.01270083|CDS chrom=scaffold_127 strand=- start=844770 end=851362 cdsStart=844770 cdsEnd=851362 sfCount=12 sfStarts=844770,845324,846352,846679,846822,847058,848345,848553,849327,849542,850192,851171, sfEnds=844826,845705,846582,846746,846959,847215,848450,848649,849448,849628,850269,851362,	GO:0000151//ubiquitin ligase complex	GO:0004842//ubiquitin-protein ligase activity;GO:0008270//zinc ion binding	GO:0016567//protein ubiquitination
816437	90	11	19.96	3.68	-2.43933	Down	1.38e-10	2.88e-09	jgi|Poptr1_1|816437|estExt_fgenesh4_pg.C_LG_II1042|CDS chrom=LG_II strand=- start=8623983 end=8627342 cdsStart=8624412 cdsEnd=8627027 sfCount=5 sfStarts=8623983,8625147,8625391,8625851,8626263, sfEnds=8625038,8625260,8625681,8626159,8627342,	-	-	-
578018	106	13	23.51	4.35	-2.43419	Down	3.15e-12	7.88e-11	jgi|Poptr1_1|578018|eugene3.00180242|CDS chrom=LG_XVIII strand=+ start=3466317 end=3471362 cdsStart=3467289 cdsEnd=3470965 sfCount=6 sfStarts=3466317,3467179,3468813,3469367,3470071,3470662, sfEnds=3466474,3468086,3469266,3469437,3470195,3471362,	-	GO:0003684//damaged DNA binding;GO:0005524//ATP binding	GO:0006298//mismatch repair
575511	65	8	14.42	2.68	-2.42777	Down	6.13e-08	8.85e-07	jgi|Poptr1_1|575511|eugene3.00150906|CDS chrom=LG_XV strand=+ start=8208801 end=8213483 cdsStart=8208824 cdsEnd=8213103 sfCount=9 sfStarts=8208801,8209480,8209744,8209924,8211052,8211856,8212032,8212840,8213381, sfEnds=8209138,8209619,8209843,8210022,8211399,8211948,8212238,8213365,8213483,	-	-	-
767849	332	41	73.63	13.71	-2.42507	Down	2.66e-35	2.41e-33	jgi|Poptr1_1|767849|fgenesh4_pg.C_LG_IX000900|CDS chrom=LG_IX strand=+ start=5998881 end=6001723 cdsStart=5998881 cdsEnd=6001723 sfCount=3 sfStarts=5998881,6001008,6001288, sfEnds=5999005,6001112,6001723,	GO:0000151//ubiquitin ligase complex	GO:0004842//ubiquitin-protein ligase activity;GO:0008270//zinc ion binding	GO:0016567//protein ubiquitination
562882	273	34	60.54	11.37	-2.41266	Down	3.98e-29	2.93e-27	jgi|Poptr1_1|562882|eugene3.00070820|CDS chrom=LG_VII strand=+ start=7285441 end=7288015 cdsStart=7285441 cdsEnd=7287703 sfCount=5 sfStarts=7285441,7286310,7286686,7287053,7287417, sfEnds=7285535,7286571,7286882,7287240,7288015,	-	-	-
666013	72	9	15.97	3.01	-2.40753	Down	1.36e-08	2.21e-07	jgi|Poptr1_1|666013|grail3.0075000401|CDS chrom=LG_XV strand=+ start=26749 end=27075 cdsStart=26785 cdsEnd=27075 sfCount=1 sfStarts=26749, sfEnds=27075,	-	-	-
429629	342	43	75.85	14.38	-2.39909	Down	6.77e-36	6.38e-34	jgi|Poptr1_1|429629|gw1.VIII.356.1|CDS chrom=LG_VIII strand=- start=12996086 end=12999377 cdsStart=12996086 cdsEnd=12999377 sfCount=8 sfStarts=12998552,12998009,12997807,12997501,12997370,12996914,12996472,12996086, sfEnds=12999377,12998473,12997896,12997610,12997446,12997061,12996633,12996337,	-	-	-
553391	151	19	33.49	6.35	-2.3989	Down	1.3e-16	5.4e-15	jgi|Poptr1_1|553391|eugene3.00030024|CDS chrom=LG_III strand=- start=520060 end=527418 cdsStart=524823 cdsEnd=527418 sfCount=5 sfStarts=520060,524356,525390,525591,526706, sfEnds=520077,525016,525516,525702,527418,	-	-	-
253565	159	20	35.26	6.69	-2.39795	Down	1.99e-17	8.67e-16	jgi|Poptr1_1|253565|gw1.XV.3001.1|CDS chrom=LG_XV strand=- start=9535227 end=9536632 cdsStart=9535227 cdsEnd=9536632 sfCount=2 sfStarts=9536356,9535227, sfEnds=9536632,9536008,	-	GO:0005554	-
556445	127	16	28.16	5.35	-2.39604	Down	3.63e-14	1.22e-12	jgi|Poptr1_1|556445|eugene3.00041158|CDS chrom=LG_IV strand=- start=14217996 end=14233790 cdsStart=14218231 cdsEnd=14233790 sfCount=26 sfStarts=14217996,14218592,14219092,14219670,14220176,14220664,14221444,14221605,14222170,14223845,14224145,14224681,14225408,14225869,14226337,14227526,14227819,14228429,14228874,14230241,14230665,14230892,14231216,14231734,14231978,14232804, sfEnds=14218489,1421…	-	GO:0016773//phosphotransferase activity, alcohol group as acceptor;GO:0004428//inositol or phosphatidylinositol kinase activity;GO:0004430//1-phosphatidylinositol 4-kinase activity	-
554690	801	101	177.64	33.78	-2.39472	Down	8.08e-82	1.48e-79	jgi|Poptr1_1|554690|eugene3.00031323|CDS chrom=LG_III strand=- start=14553428 end=14560254 cdsStart=14553891 cdsEnd=14560254 sfCount=14 sfStarts=14553428,14554308,14554727,14554948,14555272,14556306,14556772,14557267,14557500,14557791,14558063,14558668,14559926,14560177, sfEnds=14554049,14554487,14554795,14555008,14555920,14556698,14556869,14557415,14557616,14557949,14558493,14558988,14559992,145…	-	GO:0003676//nucleic acid binding	-
831143	87	11	19.29	3.68	-2.39008	Down	4.52e-10	9.03e-09	jgi|Poptr1_1|831143|estExt_fgenesh4_pm.C_LG_IV0230|CDS chrom=LG_IV strand=- start=6251737 end=6257011 cdsStart=6251737 cdsEnd=6257011 sfCount=14 sfStarts=6251737,6251990,6252172,6252513,6252889,6253099,6253585,6253817,6254266,6255160,6255738,6256002,6256571,6256866, sfEnds=6251905,6252054,6252301,6252706,6253010,6253219,6253668,6253987,6254330,6255371,6255850,6256148,6256772,6257011,	-	GO:0047611	-
557923	71	9	15.75	3.01	-2.38752	Down	2.01e-08	3.17e-07	jgi|Poptr1_1|557923|eugene3.00091183|CDS chrom=LG_IX strand=- start=7685133 end=7688003 cdsStart=7685133 cdsEnd=7688003 sfCount=4 sfStarts=7685133,7686105,7686633,7687388, sfEnds=7685216,7686227,7686658,7688003,	-	-	-
832284	204	26	45.24	8.7	-2.37851	Down	8.59e-22	4.69e-20	jgi|Poptr1_1|832284|estExt_fgenesh4_pm.C_LG_VII0217|CDS chrom=LG_VII strand=+ start=4629461 end=4631787 cdsStart=4629461 cdsEnd=4631707 sfCount=4 sfStarts=4629461,4629731,4630459,4631435, sfEnds=4629577,4630279,4630914,4631787,	-	GO:0004672//protein kinase activity;GO:0005524//ATP binding;GO:0004713//protein tyrosine kinase activity;GO:0004674//protein serine/threonine kinase activity	GO:0006468//protein amino acid phosphorylation
754146	47	6	10.42	2.01	-2.37409	Down	6.28e-06	6.35e-05	jgi|Poptr1_1|754146|fgenesh4_pg.C_LG_II000326|CDS chrom=LG_II strand=+ start=2251873 end=2252378 cdsStart=2251873 cdsEnd=2252378 sfCount=2 sfStarts=2251873,2252266, sfEnds=2252083,2252378,	-	-	-
218255	86	11	19.07	3.68	-2.37353	Down	6.7e-10	1.3e-08	jgi|Poptr1_1|218255|gw1.VII.2560.1|CDS chrom=LG_VII strand=- start=6502119 end=6511634 cdsStart=6502119 cdsEnd=6511634 sfCount=18 sfStarts=6511564,6508958,6508665,6508378,6508181,6507939,6507162,6506938,6506522,6506369,6506105,6505904,6505221,6504133,6503807,6503661,6502353,6502119, sfEnds=6511634,6509115,6508735,6508572,6508219,6508046,6507251,6507013,6506618,6506444,6506281,6506026,6505304,6504…	-	GO:0000166//nucleotide binding;GO:0017111//nucleoside-triphosphatase activity;GO:0005524//ATP binding	-
764979	39	5	8.65	1.67	-2.37285	Down	4.35e-05	0.000362792	jgi|Poptr1_1|764979|fgenesh4_pg.C_LG_VII001324|CDS chrom=LG_VII strand=- start=12752786 end=12757755 cdsStart=12752786 cdsEnd=12757755 sfCount=9 sfStarts=12752786,12753325,12753905,12754814,12755176,12756713,12757108,12757512,12757743, sfEnds=12753167,12753473,12754109,12755047,12755452,12756855,12757346,12757582,12757755,	-	-	-
745734	54	7	11.98	2.34	-2.35605	Down	1.36e-06	1.6e-05	jgi|Poptr1_1|745734|estExt_Genewise1_v1.C_1550153|CDS chrom=scaffold_155 strand=+ start=411199 end=414606 cdsStart=411286 cdsEnd=414606 sfCount=7 sfStarts=411199,411410,411907,412049,413462,413753,414492, sfEnds=411321,411507,411976,412144,413668,413883,414606,	-	-	-
833873	46	6	10.2	2.01	-2.3433	Down	9.32e-06	9.09e-05	jgi|Poptr1_1|833873|estExt_fgenesh4_pm.C_LG_X0909|CDS chrom=LG_X strand=- start=19380435 end=19393959 cdsStart=19380677 cdsEnd=19393959 sfCount=26 sfStarts=19380435,19380854,19380989,19381475,19381690,19382059,19382229,19383343,19384880,19385274,19385567,19386225,19387181,19387321,19387799,19388118,19388351,19388590,19389243,19389450,19390183,19390875,19391365,19391638,19393105,19393918, sfEnds=1…	GO:0000145//exocyst	-	GO:0006904//vesicle docking during exocytosis;GO:0015031//protein transport
835719	46	6	10.2	2.01	-2.3433	Down	9.32e-06	9.08e-05	jgi|Poptr1_1|835719|estExt_fgenesh4_pm.C_LG_XVII0156|CDS chrom=LG_XVII strand=- start=5555869 end=5558457 cdsStart=5556196 cdsEnd=5557641 sfCount=2 sfStarts=5555869,5558298, sfEnds=5557663,5558457,	-	GO:0003676//nucleic acid binding;GO:0003979//UDP-glucose 6-dehydrogenase activity	GO:0006118//electron transport
827567	46	6	10.2	2.01	-2.3433	Down	9.32e-06	9.07e-05	jgi|Poptr1_1|827567|estExt_fgenesh4_pg.C_880089|CDS chrom=scaffold_88 strand=- start=1151860 end=1154442 cdsStart=1152120 cdsEnd=1154410 sfCount=8 sfStarts=1151860,1152553,1152992,1153274,1153630,1153778,1154341,1154397, sfEnds=1152454,1152698,1153067,1153323,1153702,1154317,1154372,1154442,	-	-	-
803865	84	11	18.63	3.68	-2.33985	Down	1.47e-09	2.71e-08	jgi|Poptr1_1|803865|fgenesh4_pm.C_LG_VIII000820|CDS chrom=LG_VIII strand=+ start=13223229 end=13231861 cdsStart=13223229 cdsEnd=13231861 sfCount=25 sfStarts=13223229,13223281,13223515,13223789,13224045,13224293,13225501,13226212,13226372,13226613,13226686,13226845,13227017,13227504,13227744,13228332,13229233,13229843,13230080,13230586,13230760,13230940,13231249,13231486,13231712, sfEnds=13223244,…	GO:0005634//nucleus	-	GO:0006355//regulation of transcription, DNA-dependent
803890	38	5	8.43	1.67	-2.33568	Down	6.46e-05	0.000513134	jgi|Poptr1_1|803890|fgenesh4_pm.C_LG_VIII000845|CDS chrom=LG_VIII strand=- start=13710869 end=13714517 cdsStart=13710869 cdsEnd=13714517 sfCount=6 sfStarts=13710869,13711138,13712451,13713221,13713794,13714370, sfEnds=13711059,13711411,13713169,13713694,13714276,13714517,	GO:0000151//ubiquitin ligase complex	GO:0004842//ubiquitin-protein ligase activity;GO:0008270//zinc ion binding	GO:0016567//protein ubiquitination
589614	38	5	8.43	1.67	-2.33568	Down	6.46e-05	0.000512796	jgi|Poptr1_1|589614|eugene3.00280350|CDS chrom=scaffold_28 strand=- start=3554095 end=3558610 cdsStart=3554095 cdsEnd=3558610 sfCount=5 sfStarts=3554095,3556132,3556381,3557364,3558119, sfEnds=3554908,3556229,3556509,3557648,3558610,	GO:0016020//membrane	GO:0046873//metal ion transmembrane transporter activity	GO:0030001//metal ion transport
277260	76	10	16.85	3.34	-2.33483	Down	9.77e-09	1.63e-07	jgi|Poptr1_1|277260|gw1.193.110.1|CDS chrom=scaffold_193 strand=+ start=300373 end=303574 cdsStart=300373 cdsEnd=303574 sfCount=7 sfStarts=300373,300893,301215,301727,302264,302939,303079, sfEnds=300553,300975,301336,301935,302615,303040,303574,	-	GO:0004672//protein kinase activity;GO:0005524//ATP binding	GO:0006468//protein amino acid phosphorylation;GO:0006950//response to stress
729466	325	43	72.08	14.38	-2.32554	Down	5.01e-33	4.14e-31	jgi|Poptr1_1|729466|estExt_Genewise1_v1.C_LG_XIII0676|CDS chrom=LG_XIII strand=+ start=814352 end=820855 cdsStart=814700 cdsEnd=820695 sfCount=19 sfStarts=814352,815521,815774,816040,816367,816522,816947,817163,817322,817514,817772,817966,818243,818502,818842,819245,819367,819812,820566, sfEnds=814832,815687,815917,816276,816438,816602,817078,817244,817417,817690,817878,818131,818399,818755,81900…	GO:0005875//microtubule associated complex	GO:0003777//microtubule motor activity;GO:0005524//ATP binding	GO:0007018//microtubule-based movement
561262	181	24	40.14	8.03	-2.32157	Down	5.48e-19	2.64e-17	jgi|Poptr1_1|561262|eugene3.00061221|CDS chrom=LG_VI strand=+ start=11214168 end=11216095 cdsStart=11214168 cdsEnd=11216095 sfCount=3 sfStarts=11214168,11214911,11215275, sfEnds=11214452,11215016,11216095,	-	-	-
819686	60	8	13.31	2.68	-2.31221	Down	4.4e-07	5.66e-06	jgi|Poptr1_1|819686|estExt_fgenesh4_pg.C_LG_VII0121|CDS chrom=LG_VII strand=- start=811610 end=817134 cdsStart=811903 cdsEnd=816986 sfCount=10 sfStarts=811610,812556,812844,813392,814328,814509,814900,815731,816030,816919, sfEnds=812064,812657,812929,813663,814419,814646,814970,815917,816180,817134,	-	-	-
779065	156	21	34.6	7.02	-2.30123	Down	2.21e-16	9.02e-15	jgi|Poptr1_1|779065|fgenesh4_pg.C_LG_XVIII000433|CDS chrom=LG_XVIII strand=- start=5757415 end=5763437 cdsStart=5757415 cdsEnd=5763437 sfCount=13 sfStarts=5757415,5758117,5758386,5759446,5759593,5759829,5760154,5760423,5760689,5761527,5761787,5763065,5763255, sfEnds=5757688,5758244,5759327,5759508,5759646,5760005,5760285,5760539,5761387,5761601,5762017,5763154,5763437,	-	GO:0046524//sucrose-phosphate synthase activity	GO:0009058//biosynthetic process
800217	74	10	16.41	3.34	-2.29666	Down	2.13e-08	3.32e-07	jgi|Poptr1_1|800217|fgenesh4_pm.C_LG_III000682|CDS chrom=LG_III strand=+ start=17327190 end=17332828 cdsStart=17327190 cdsEnd=17332828 sfCount=8 sfStarts=17327190,17328477,17331139,17331462,17331778,17331914,17332267,17332682, sfEnds=17327752,17331020,17331356,17331685,17331837,17332044,17332381,17332828,	GO:0000151//ubiquitin ligase complex	GO:0003677//DNA binding;GO:0005524//ATP binding;GO:0008026//ATP-dependent helicase activity;GO:0003676//nucleic acid binding;GO:0004386//helicase activity;GO:0004842//ubiquitin-protein ligase activity;GO:0008270//zinc ion binding;GO:0004003//ATP-dependent DNA helicase activity;GO:0004004//ATP-dependent RNA helicase activity;GO:0008094//DNA-dependent ATPase activity;GO:0008186//RNA-dependent ATPas…	GO:0016567//protein ubiquitination
672635	466	63	103.35	21.07	-2.29428	Down	5.45e-46	6.84e-44	jgi|Poptr1_1|672635|grail3.0147006001|CDS chrom=scaffold_147 strand=+ start=568258 end=570612 cdsStart=569291 cdsEnd=570612 sfCount=5 sfStarts=568258,568895,569071,569196,569848, sfEnds=568585,569032,569172,569536,570612,	-	GO:0004672//protein kinase activity;GO:0005524//ATP binding;GO:0004713//protein tyrosine kinase activity;GO:0004674//protein serine/threonine kinase activity	GO:0006468//protein amino acid phosphorylation
751926	169	23	37.48	7.69	-2.28507	Down	1.66e-17	7.3e-16	jgi|Poptr1_1|751926|fgenesh4_pg.C_LG_I001529|CDS chrom=LG_I strand=+ start=15434940 end=15435950 cdsStart=15434940 cdsEnd=15435950 sfCount=1 sfStarts=15434940, sfEnds=15435950,	GO:0005634//nucleus	GO:0003700//transcription factor activity	GO:0006355//regulation of transcription, DNA-dependent
568529	257	35	57	11.71	-2.28322	Down	6.8e-26	4.41e-24	jgi|Poptr1_1|568529|eugene3.00110543|CDS chrom=LG_XI strand=+ start=6370104 end=6373912 cdsStart=6370694 cdsEnd=6373347 sfCount=5 sfStarts=6370104,6370299,6370688,6371254,6373334, sfEnds=6370182,6370423,6370915,6372454,6373912,	-	GO:0003676//nucleic acid binding	-
562436	44	6	9.76	2.01	-2.27969	Down	2.04e-05	0.000182226	jgi|Poptr1_1|562436|eugene3.00070374|CDS chrom=LG_VII strand=+ start=2600478 end=2603178 cdsStart=2600564 cdsEnd=2603135 sfCount=10 sfStarts=2600478,2600863,2601122,2601301,2601712,2601905,2602275,2602421,2602613,2603019, sfEnds=2600597,2600999,2601168,2601626,2601794,2601980,2602336,2602516,2602774,2603178,	-	GO:0008270//zinc ion binding;GO:0016491//oxidoreductase activity;GO:0004022//alcohol dehydrogenase activity;GO:0004023//alcohol dehydrogenase activity, metal ion-independent;GO:0004024//alcohol dehydrogenase activity, zinc-dependent;GO:0004025//alcohol dehydrogenase activity, iron-dependent	-
261765	51	7	11.31	2.34	-2.27302	Down	4.4e-06	4.65e-05	jgi|Poptr1_1|261765|gw1.XVIII.2306.1|CDS chrom=LG_XVIII strand=- start=7586833 end=7589760 cdsStart=7586833 cdsEnd=7589760 sfCount=11 sfStarts=7589666,7589486,7589290,7589087,7588825,7588048,7587802,7587500,7587226,7587029,7586833, sfEnds=7589760,7589583,7589394,7589149,7588898,7588513,7587900,7587658,7587332,7587103,7586883,	-	-	-
653603	51	7	11.31	2.34	-2.27302	Down	4.4e-06	4.64e-05	jgi|Poptr1_1|653603|grail3.0030020601|CDS chrom=LG_VI strand=- start=12202077 end=12208217 cdsStart=12202077 cdsEnd=12208135 sfCount=7 sfStarts=12202077,12203237,12203823,12204003,12206297,12206913,12208092, sfEnds=12202178,12203344,12203912,12204119,12206416,12207087,12208217,	-	-	-
799854	51	7	11.31	2.34	-2.27302	Down	4.4e-06	4.64e-05	jgi|Poptr1_1|799854|fgenesh4_pm.C_LG_III000319|CDS chrom=LG_III strand=+ start=10522880 end=10529086 cdsStart=10522880 cdsEnd=10529086 sfCount=12 sfStarts=10522880,10523861,10524491,10524670,10525486,10525699,10526708,10526979,10527192,10527348,10528201,10529030, sfEnds=10523110,10523938,10524577,10524791,10525582,10525804,10526865,10527116,10527259,10527578,10528573,10529086,	GO:0000151//ubiquitin ligase complex	GO:0004842//ubiquitin-protein ligase activity;GO:0008270//zinc ion binding	GO:0016567//protein ubiquitination
427676	51	7	11.31	2.34	-2.27302	Down	4.4e-06	4.63e-05	jgi|Poptr1_1|427676|gw1.VI.1348.1|CDS chrom=LG_VI strand=- start=740538 end=745365 cdsStart=740538 cdsEnd=745365 sfCount=7 sfStarts=744870,744110,743353,742209,741909,740895,740538, sfEnds=745365,744342,743643,742337,742082,741002,740741,	-	-	-
560381	222	31	49.23	10.37	-2.24712	Down	3.66e-22	2.02e-20	jgi|Poptr1_1|560381|eugene3.00060340|CDS chrom=LG_VI strand=+ start=2430472 end=2435492 cdsStart=2430472 cdsEnd=2435492 sfCount=5 sfStarts=2430472,2432275,2433011,2433340,2433659, sfEnds=2430540,2432880,2433133,2433572,2435492,	-	-	-
839596	43	6	9.54	2.01	-2.24679	Down	3.01e-05	0.00025803	jgi|Poptr1_1|839596|e_gw1.I.9406.1|CDS chrom=LG_I strand=+ start=9166283 end=9167488 cdsStart=9166283 cdsEnd=9167488 sfCount=1 sfStarts=9166283, sfEnds=9167488,	-	-	-
835900	107	15	23.73	5.02	-2.24095	Down	2.49e-11	5.64e-10	jgi|Poptr1_1|835900|estExt_fgenesh4_pm.C_LG_XVIII0272|CDS chrom=LG_XVIII strand=+ start=9205024 end=9214771 cdsStart=9205024 cdsEnd=9214175 sfCount=22 sfStarts=9205024,9205364,9206192,9206352,9206685,9206950,9207605,9207893,9208190,9208686,9209901,9210085,9210272,9210997,9211420,9211917,9212377,9212587,9213353,9213773,9214062,9214348, sfEnds=9205079,9205463,9206260,9206579,9206862,9207036,9207795…	-	GO:0003779//actin binding	GO:0007010//cytoskeleton organization
1071346	227	32	50.34	10.7	-2.23409	Down	1.77e-22	1e-20	jgi|Poptr1_1|1071346|estExt_Genewise1Plus.C_LG_II0791|CDS chrom=LG_II strand=- start=3677277 end=3681165 cdsStart=3677611 cdsEnd=3681165 sfCount=9 sfStarts=3677277,3678048,3678609,3679351,3679560,3679857,3680445,3680669,3681123, sfEnds=3677919,3678477,3678706,3679453,3679641,3680014,3680558,3680873,3681165,	-	-	-
550077	106	15	23.51	5.02	-2.22752	Down	3.65e-11	8.07e-10	jgi|Poptr1_1|550077|eugene3.00012518|CDS chrom=LG_I strand=+ start=27866380 end=27867819 cdsStart=27866380 cdsEnd=27867819 sfCount=1 sfStarts=27866380, sfEnds=27867819,	-	-	-
718063	204	29	45.24	9.7	-2.22154	Down	3.23e-20	1.63e-18	jgi|Poptr1_1|718063|estExt_Genewise1_v1.C_LG_VII0182|CDS chrom=LG_VII strand=+ start=12580943 end=12584968 cdsStart=12580943 cdsEnd=12584731 sfCount=7 sfStarts=12580943,12581831,12582583,12582895,12583233,12584465,12584851, sfEnds=12581211,12582068,12582831,12583126,12583435,12584797,12584968,	GO:0016021//integral to membrane;GO:0016020//membrane	GO:0005215//transporter activity	GO:0006810//transport
757535	70	10	15.52	3.34	-2.21621	Down	9.89e-08	1.41e-06	jgi|Poptr1_1|757535|fgenesh4_pg.C_LG_III001077|CDS chrom=LG_III strand=- start=12169017 end=12172633 cdsStart=12169017 cdsEnd=12172633 sfCount=2 sfStarts=12169017,12171629, sfEnds=12169943,12172633,	GO:0005634//nucleus;GO:0005622//intracellular	GO:0003677//DNA binding	-
430800	49	7	10.87	2.34	-2.21577	Down	9.51e-06	9.24e-05	jgi|Poptr1_1|430800|gw1.VIII.1527.1|CDS chrom=LG_VIII strand=+ start=1273665 end=1281154 cdsStart=1273665 cdsEnd=1281154 sfCount=14 sfStarts=1273665,1273950,1274100,1274808,1275834,1276036,1276985,1277753,1277952,1278131,1278696,1278893,1280084,1280642, sfEnds=1273789,1274023,1274163,1274876,1275933,1276149,1277154,1277837,1278091,1278173,1278755,1278957,1280363,1281154,	-	-	-
593823	42	6	9.31	2.01	-2.21159	Down	4.43e-05	0.000368073	jgi|Poptr1_1|593823|eugene3.00570067|CDS chrom=scaffold_57 strand=+ start=530635 end=534814 cdsStart=530635 cdsEnd=534814 sfCount=15 sfStarts=530635,530912,531072,531473,531687,531878,532432,532690,533134,533450,533591,533838,534133,534295,534440, sfEnds=530748,530969,531295,531589,531747,531978,532506,532775,533183,533490,533761,533873,534200,534355,534814,	GO:0016021//integral to membrane	-	GO:0008219//cell death
727749	165	24	36.59	8.03	-2.18798	Down	2.44e-16	9.95e-15	jgi|Poptr1_1|727749|estExt_Genewise1_v1.C_LG_XI2194|CDS chrom=LG_XI strand=- start=3384590 end=3387192 cdsStart=3385030 cdsEnd=3387171 sfCount=5 sfStarts=3384590,3385353,3385959,3386256,3386957, sfEnds=3385227,3385418,3386123,3386319,3387192,	-	-	-
1100231	55	8	12.2	2.68	-2.18658	Down	3.02e-06	3.29e-05	jgi|Poptr1_1|1100231|estExt_Genewise1Plus.C_LG_XIV3668|CDS chrom=LG_XIV strand=- start=10611881 end=10619455 cdsStart=10612023 cdsEnd=10619455 sfCount=13 sfStarts=10611881,10612794,10613032,10613282,10613498,10614278,10616101,10616385,10616589,10617489,10618312,10618855,10619306, sfEnds=10612202,10612943,10613079,10613358,10613600,10614408,10616278,10616442,10616652,10617659,10618423,10619094,106…	-	-	-
267168	48	7	10.64	2.34	-2.18492	Down	1.39e-05	0.000129474	jgi|Poptr1_1|267168|gw1.127.174.1|CDS chrom=scaffold_127 strand=- start=495171 end=501235 cdsStart=495171 cdsEnd=501235 sfCount=8 sfStarts=501054,498867,498233,497140,496935,496272,495963,495171, sfEnds=501235,499015,498369,497245,497053,496339,496188,495389,	-	GO:0004315//3-oxoacyl-[acyl-carrier-protein] synthase activity	GO:0006633//fatty acid biosynthetic process
803861	281	41	62.32	13.71	-2.18447	Down	8.63e-27	5.78e-25	jgi|Poptr1_1|803861|fgenesh4_pm.C_LG_VIII000816|CDS chrom=LG_VIII strand=+ start=13145511 end=13157402 cdsStart=13145511 cdsEnd=13157402 sfCount=25 sfStarts=13145511,13145711,13145954,13146955,13147204,13148696,13149466,13149821,13150911,13151135,13151308,13151488,13151777,13152067,13152691,13152915,13153110,13154066,13154349,13154523,13155407,13155705,13156417,13156863,13157096, sfEnds=13145615,…	GO:0016020//membrane;GO:0016021//integral to membrane	GO:0005524//ATP binding;GO:0015662//ATPase activity, coupled to transmembrane movement of ions, phosphorylative mechanism;GO:0016887//ATPase activity;GO:0004012//phospholipid-translocating ATPase activity	GO:0006812//cation transport
552010	89	13	19.74	4.35	-2.18203	Down	2.29e-09	4.14e-08	jgi|Poptr1_1|552010|eugene3.00021325|CDS chrom=LG_II strand=+ start=10718325 end=10719761 cdsStart=10718325 cdsEnd=10719761 sfCount=1 sfStarts=10718325, sfEnds=10719761,	GO:0005634//nucleus	GO:0003676//nucleic acid binding;GO:0008270//zinc ion binding	-
803609	82	12	18.19	4.01	-2.18147	Down	1.03e-08	1.72e-07	jgi|Poptr1_1|803609|fgenesh4_pm.C_LG_VIII000564|CDS chrom=LG_VIII strand=+ start=8515309 end=8525640 cdsStart=8515309 cdsEnd=8525640 sfCount=10 sfStarts=8515309,8516091,8517919,8518083,8520177,8523702,8524023,8524846,8525097,8525478, sfEnds=8515698,8516160,8517986,8518171,8520374,8523906,8524190,8525013,8525287,8525640,	-	-	-
828090	41	6	9.09	2.01	-2.17708	Down	6.5e-05	0.000514565	jgi|Poptr1_1|828090|estExt_fgenesh4_pg.C_1350050|CDS chrom=scaffold_135 strand=- start=594731 end=604722 cdsStart=594731 cdsEnd=604036 sfCount=19 sfStarts=594731,594943,595688,596215,596695,597016,597429,597687,597986,598990,599358,600281,601970,602238,602840,603436,603870,604348,604705, sfEnds=594845,595160,596080,596293,596834,597328,597571,597887,598114,599268,599654,601879,602112,602729,60311…	GO:0005634//nucleus	GO:0003712//transcription cofactor activity;GO:0008270//zinc ion binding;GO:0003677//DNA binding;GO:0003713//transcription coactivator activity;GO:0004402//histone acetyltransferase activity	GO:0006355//regulation of transcription, DNA-dependent;GO:0045449//regulation of transcription
647588	41	6	9.09	2.01	-2.17708	Down	6.5e-05	0.000514228	jgi|Poptr1_1|647588|grail3.0111004201|CDS chrom=LG_IV strand=+ start=540450 end=544035 cdsStart=540648 cdsEnd=543969 sfCount=11 sfStarts=540450,540890,541079,541275,541460,542094,542281,542467,543242,543689,543877, sfEnds=540806,540980,541131,541367,541531,542166,542326,542530,543295,543766,544035,	-	-	-
582529	61	9	13.53	3.01	-2.16833	Down	9.63e-07	1.16e-05	jgi|Poptr1_1|582529|eugene3.01400010|CDS chrom=scaffold_140 strand=+ start=119403 end=123351 cdsStart=119403 cdsEnd=123176 sfCount=4 sfStarts=119403,120043,122470,123237, sfEnds=119487,121182,123227,123351,	-	-	-
754786	1695	251	375.9	83.95	-2.16275	Down	7.93e-152	1.88e-149	jgi|Poptr1_1|754786|fgenesh4_pg.C_LG_II000966|CDS chrom=LG_II strand=+ start=7536270 end=7537838 cdsStart=7536270 cdsEnd=7537838 sfCount=3 sfStarts=7536270,7536695,7536843, sfEnds=7536364,7536764,7537838,	-	-	-
832808	54	8	11.98	2.68	-2.16032	Down	4.42e-06	4.65e-05	jgi|Poptr1_1|832808|estExt_fgenesh4_pm.C_LG_VIII0651|CDS chrom=LG_VIII strand=- start=10268325 end=10273192 cdsStart=10268839 cdsEnd=10273192 sfCount=9 sfStarts=10268325,10268536,10269141,10269607,10270251,10271603,10272426,10272795,10273174, sfEnds=10268338,10269015,10269320,10269723,10270408,10271902,10272504,10273006,10273192,	-	-	-
797014	54	8	11.98	2.68	-2.16032	Down	4.42e-06	4.64e-05	jgi|Poptr1_1|797014|fgenesh4_pm.C_LG_I000017|CDS chrom=LG_I strand=- start=301243 end=310285 cdsStart=301243 cdsEnd=310285 sfCount=20 sfStarts=301243,302125,302307,302703,302945,303092,303257,304352,304533,304955,305115,305340,305503,305904,306150,306485,306728,306905,308272,309059, sfEnds=301404,302191,302398,302839,303011,303158,303342,304444,304718,305011,305242,305409,305638,306058,306224,306…	-	GO:0004429;GO:0015072;GO:0015073;GO:0016303//1-phosphatidylinositol-3-kinase activity	-
232704	74	11	16.41	3.68	-2.1568	Down	6.79e-08	9.77e-07	jgi|Poptr1_1|232704|gw1.XI.684.1|CDS chrom=LG_XI strand=+ start=13749594 end=13750747 cdsStart=13749594 cdsEnd=13750747 sfCount=2 sfStarts=13749594,13749995, sfEnds=13749866,13750747,	-	GO:0005554	-
1114377	121	18	26.83	6.02	-2.15601	Down	3.94e-12	9.71e-11	jgi|Poptr1_1|1114377|estExt_Genewise1Plus.C_1210170|CDS chrom=scaffold_121 strand=- start=858666 end=868525 cdsStart=859214 cdsEnd=868525 sfCount=23 sfStarts=858666,858934,859131,859413,859712,860735,860886,861264,861780,862233,863039,863288,863455,864515,865268,865515,865760,866491,866713,866964,867312,868138,868470, sfEnds=858900,859046,859327,859615,860039,860800,861011,861445,861927,862361,86…	-	-	-
296648	47	7	10.42	2.34	-2.15477	Down	2.04e-05	0.000182195	jgi|Poptr1_1|296648|gw1.82.188.1|CDS chrom=scaffold_82 strand=- start=1441772 end=1446600 cdsStart=1441772 cdsEnd=1446600 sfCount=8 sfStarts=1446471,1446240,1445033,1444586,1443414,1442790,1442299,1441772, sfEnds=1446600,1446415,1445160,1444926,1444091,1442918,1442487,1441849,	-	-	-
818967	161	24	35.71	8.03	-2.15286	Down	1.09e-15	4.12e-14	jgi|Poptr1_1|818967|estExt_fgenesh4_pg.C_LG_VI0206|CDS chrom=LG_VI strand=+ start=1604706 end=1609343 cdsStart=1604706 cdsEnd=1609206 sfCount=11 sfStarts=1604706,1605243,1606120,1606327,1606585,1607137,1607351,1607989,1608628,1608825,1609133, sfEnds=1604793,1605325,1606195,1606394,1606669,1607258,1607434,1608135,1608736,1608944,1609343,	-	-	-
672285	187	28	41.47	9.36	-2.14749	Down	6.04e-18	2.76e-16	jgi|Poptr1_1|672285|grail3.0142002501|CDS chrom=scaffold_142 strand=- start=285307 end=289476 cdsStart=285307 cdsEnd=289476 sfCount=4 sfStarts=285307,285634,287878,288727, sfEnds=285537,286089,288072,289476,	-	-	-
712751	80	12	17.74	4.01	-2.14533	Down	2.18e-08	3.39e-07	jgi|Poptr1_1|712751|estExt_Genewise1_v1.C_LG_III2630|CDS chrom=LG_III strand=+ start=18754183 end=18760271 cdsStart=18754684 cdsEnd=18759700 sfCount=6 sfStarts=18754183,18754945,18756439,18757264,18757655,18759194, sfEnds=18754851,18755028,18756681,18757431,18757768,18760271,	-	-	-
1094681	40	6	8.87	2.01	-2.14174	Down	9.51e-05	0.000723605	jgi|Poptr1_1|1094681|estExt_Genewise1Plus.C_LG_XI3518|CDS chrom=LG_XI strand=+ start=13733990 end=13741392 cdsStart=13733990 cdsEnd=13740702 sfCount=5 sfStarts=13733990,13734596,13735426,13737725,13738601, sfEnds=13734041,13734738,13735482,13737785,13741392,	-	-	-
813267	53	8	11.75	2.68	-2.13236	Down	6.44e-06	6.49e-05	jgi|Poptr1_1|813267|fgenesh4_pm.C_scaffold_29000043|CDS chrom=scaffold_29 strand=- start=1021907 end=1024750 cdsStart=1021907 cdsEnd=1024750 sfCount=3 sfStarts=1021907,1023742,1024600, sfEnds=1022469,1024485,1024750,	GO:0016021//integral to membrane	GO:0005215//transporter activity	GO:0006810//transport
819733	59	9	13.08	3.01	-2.11953	Down	2.04e-06	2.31e-05	jgi|Poptr1_1|819733|estExt_fgenesh4_pg.C_LG_VII0265|CDS chrom=LG_VII strand=+ start=1692982 end=1697801 cdsStart=1692989 cdsEnd=1697557 sfCount=6 sfStarts=1692982,1693238,1694268,1696349,1696680,1697068, sfEnds=1693083,1694168,1694467,1696385,1696747,1697801,	-	-	-
770622	98	15	21.73	5.02	-2.11393	Down	7.37e-10	1.42e-08	jgi|Poptr1_1|770622|fgenesh4_pg.C_LG_X002112|CDS chrom=LG_X strand=- start=19691711 end=19700175 cdsStart=19691711 cdsEnd=19700175 sfCount=16 sfStarts=19691711,19692196,19692446,19693034,19693600,19694388,19694627,19695270,19696611,19697027,19697886,19698097,19698495,19699020,19699378,19699654, sfEnds=19692100,19692277,19692598,19693203,19693788,19694516,19695139,19695473,19696925,19697198,196979…	-	-	GO:0009058//biosynthetic process
798230	104	16	23.06	5.35	-2.10778	Down	2.39e-10	4.87e-09	jgi|Poptr1_1|798230|fgenesh4_pm.C_LG_I001233|CDS chrom=LG_I strand=+ start=33494873 end=33503306 cdsStart=33494873 cdsEnd=33503306 sfCount=14 sfStarts=33494873,33496313,33497354,33498258,33498435,33499304,33499807,33500467,33501139,33501475,33501984,33502022,33502687,33503142, sfEnds=33495042,33496549,33497501,33498317,33498530,33499696,33499947,33500637,33501396,33501617,33501990,33502563,335029…	-	GO:0004197//cysteine-type endopeptidase activity;GO:0004221//ubiquitin thiolesterase activity	GO:0006511//ubiquitin-dependent protein catabolic process;GO:0006512//ubiquitin cycle
565310	52	8	11.53	2.68	-2.10509	Down	9.37e-06	9.12e-05	jgi|Poptr1_1|565310|eugene3.00081905|CDS chrom=LG_VIII strand=- start=13934657 end=13939880 cdsStart=13935216 cdsEnd=13939880 sfCount=11 sfStarts=13934657,13934758,13936342,13936630,13936904,13937192,13937471,13937867,13938049,13938383,13939857, sfEnds=13934738,13935502,13936502,13936731,13937115,13937347,13937620,13937926,13938176,13938791,13939880,	-	GO:0004672//protein kinase activity;GO:0005524//ATP binding;GO:0004713//protein tyrosine kinase activity;GO:0004674//protein serine/threonine kinase activity;GO:0004707//MAP kinase activity;GO:0004675//transmembrane receptor protein serine/threonine kinase activity;GO:0004676//3-phosphoinositide-dependent protein kinase activity;GO:0004677//DNA-dependent protein kinase activity;GO:0004679//AMP-ac…	GO:0006468//protein amino acid phosphorylation
739274	45	7	9.98	2.34	-2.09253	Down	4.33e-05	0.000361673	jgi|Poptr1_1|739274|estExt_Genewise1_v1.C_280333|CDS chrom=scaffold_28 strand=+ start=1180048 end=1191689 cdsStart=1180216 cdsEnd=1191689 sfCount=24 sfStarts=1180048,1180374,1180544,1181012,1181532,1181890,1182430,1182901,1183704,1183930,1184502,1185358,1185915,1186545,1186975,1187266,1188261,1189508,1190117,1190565,1190986,1191216,1191473,1191640, sfEnds=1180293,1180460,1180673,1181191,1181614,1…	-	-	-
833366	64	10	14.19	3.34	-2.08695	Down	9.44e-07	1.14e-05	jgi|Poptr1_1|833366|estExt_fgenesh4_pm.C_LG_X0035|CDS chrom=LG_X strand=- start=554905 end=566018 cdsStart=554905 cdsEnd=566018 sfCount=20 sfStarts=554905,555227,556155,556324,556739,557002,557293,558579,559172,559776,560638,560896,561563,561776,562575,563717,564814,565049,565301,565740, sfEnds=555151,555288,556220,556455,556840,557199,557439,558689,559681,559932,560787,561035,561679,562018,56274…	-	GO:0003824//catalytic activity;GO:0004630//phospholipase D activity	GO:0008152//metabolic process
668457	64	10	14.19	3.34	-2.08695	Down	9.44e-07	1.14e-05	jgi|Poptr1_1|668457|grail3.0080003601|CDS chrom=LG_XVII strand=- start=2956135 end=2957676 cdsStart=2956135 cdsEnd=2957538 sfCount=1 sfStarts=2956135, sfEnds=2957676,	-	-	-
832044	64	10	14.19	3.34	-2.08695	Down	9.44e-07	1.14e-05	jgi|Poptr1_1|832044|estExt_fgenesh4_pm.C_LG_VI0588|CDS chrom=LG_VI strand=- start=13910554 end=13919048 cdsStart=13910923 cdsEnd=13919048 sfCount=24 sfStarts=13910554,13910614,13911716,13912361,13912745,13912929,13913209,13913370,13913872,13914131,13914438,13914699,13914911,13915054,13915237,13915423,13915605,13917122,13917354,13917567,13917786,13918243,13918758,13918990, sfEnds=13910580,13911126…	GO:0005875//microtubule associated complex	GO:0003777//microtubule motor activity;GO:0005524//ATP binding	GO:0007018//microtubule-based movement
551661	64	10	14.19	3.34	-2.08695	Down	9.44e-07	1.14e-05	jgi|Poptr1_1|551661|eugene3.00020976|CDS chrom=LG_II strand=+ start=7686941 end=7695187 cdsStart=7686941 cdsEnd=7694931 sfCount=27 sfStarts=7686941,7687180,7687422,7687653,7688159,7688481,7688907,7689041,7689221,7689420,7689618,7689787,7690401,7690883,7691073,7691257,7691464,7691833,7691979,7692138,7692296,7692625,7692804,7693198,7693677,7693869,7694521, sfEnds=7687051,7687326,7687574,7687906,768…	GO:0005875//microtubule associated complex	GO:0003777//microtubule motor activity;GO:0005524//ATP binding;GO:0008574//plus-end-directed microtubule motor activity	GO:0007018//microtubule-based movement
288153	109	17	24.17	5.69	-2.08672	Down	1.12e-10	2.37e-09	jgi|Poptr1_1|288153|gw1.41.638.1|CDS chrom=scaffold_41 strand=+ start=2420253 end=2422815 cdsStart=2420253 cdsEnd=2422815 sfCount=6 sfStarts=2420253,2420619,2421225,2421844,2422040,2422663, sfEnds=2420480,2420936,2421452,2421944,2422427,2422815,	GO:0005952//cAMP-dependent protein kinase complex;GO:0005956//protein kinase CK2 complex	GO:0004672//protein kinase activity;GO:0005524//ATP binding;GO:0004713//protein tyrosine kinase activity;GO:0004674//protein serine/threonine kinase activity;GO:0004682//protein kinase CK2 activity;GO:0004691//cAMP-dependent protein kinase activity;GO:0008603//cAMP-dependent protein kinase regulator activity;GO:0008605//protein kinase CK2 regulator activity	GO:0006468//protein amino acid phosphorylation
666576	83	13	18.41	4.35	-2.0814	Down	2.15e-08	3.35e-07	jgi|Poptr1_1|666576|grail3.0005020301|CDS chrom=LG_XV strand=+ start=6600176 end=6604555 cdsStart=6600798 cdsEnd=6604555 sfCount=4 sfStarts=6600176,6600758,6602480,6602738, sfEnds=6600616,6601026,6602574,6604555,	-	-	-
922955	102	16	22.62	5.35	-2.07999	Down	5e-10	9.86e-09	jgi|Poptr1_1|922955|e_gw1.82.99.1|CDS chrom=scaffold_82 strand=- start=540203 end=541109 cdsStart=540203 cdsEnd=541109 sfCount=2 sfStarts=540203,540783, sfEnds=540514,541109,	-	-	-
568797	51	8	11.31	2.68	-2.07729	Down	1.36e-05	0.000126753	jgi|Poptr1_1|568797|eugene3.00110811|CDS chrom=LG_XI strand=- start=10424708 end=10427127 cdsStart=10424708 cdsEnd=10427127 sfCount=8 sfStarts=10424708,10425086,10425724,10426028,10426287,10426482,10426785,10427079, sfEnds=10425001,10425252,10425890,10426175,10426392,10426675,10426901,10427127,	-	GO:0004378//glycolipid 3-alpha-mannosyltransferase activity	GO:0009058//biosynthetic process
715832	51	8	11.31	2.68	-2.07729	Down	1.36e-05	0.000126656	jgi|Poptr1_1|715832|estExt_Genewise1_v1.C_LG_V2649|CDS chrom=LG_V strand=+ start=814383 end=820877 cdsStart=814383 cdsEnd=820445 sfCount=7 sfStarts=814383,815862,816336,817110,817350,818754,820296, sfEnds=815495,816237,816412,817229,817514,818891,820877,	-	GO:0004143//diacylglycerol kinase activity	GO:0007205//activation of protein kinase C activity by G-protein coupled receptor protein signaling pathway;GO:0007242//intracellular signaling cascade
831368	178	28	39.48	9.36	-2.07654	Down	1.67e-16	6.84e-15	jgi|Poptr1_1|831368|estExt_fgenesh4_pm.C_LG_V0072|CDS chrom=LG_V strand=- start=1297138 end=1312032 cdsStart=1297629 cdsEnd=1312032 sfCount=26 sfStarts=1297138,1297528,1297890,1298063,1298225,1299197,1299536,1301142,1301373,1303623,1303879,1304148,1304585,1305316,1305506,1306433,1306672,1306866,1307302,1307690,1307860,1308185,1308796,1309327,1310813,1311971, sfEnds=1297467,1297715,1297968,1298115…	-	GO:0005524//ATP binding;GO:0016887//ATPase activity;GO:0000166//nucleotide binding;GO:0017111//nucleoside-triphosphatase activity	-
275442	70	11	15.52	3.68	-2.07635	Down	3.01e-07	3.97e-06	jgi|Poptr1_1|275442|gw1.171.80.1|CDS chrom=scaffold_171 strand=- start=326213 end=329989 cdsStart=326213 cdsEnd=329989 sfCount=6 sfStarts=329834,328955,328614,328397,328225,326213, sfEnds=329989,329118,328761,328519,328312,326376,	-	GO:0004672//protein kinase activity;GO:0005524//ATP binding;GO:0004713//protein tyrosine kinase activity;GO:0004674//protein serine/threonine kinase activity	GO:0006468//protein amino acid phosphorylation
642208	57	9	12.64	3.01	-2.07016	Down	4.3e-06	4.56e-05	jgi|Poptr1_1|642208|grail3.0032001401|CDS chrom=LG_I strand=+ start=28519166 end=28520811 cdsStart=28519166 cdsEnd=28520794 sfCount=1 sfStarts=28519166, sfEnds=28520811,	-	-	-
808299	57	9	12.64	3.01	-2.07016	Down	4.3e-06	4.56e-05	jgi|Poptr1_1|808299|fgenesh4_pm.C_LG_XVI000027|CDS chrom=LG_XVI strand=+ start=644855 end=649887 cdsStart=644855 cdsEnd=649887 sfCount=7 sfStarts=644855,646354,647012,648081,648343,649433,649681, sfEnds=645341,646586,647302,648209,648516,649540,649887,	GO:0016020//membrane	GO:0008378//galactosyltransferase activity;GO:0003824//catalytic activity	GO:0006486//protein amino acid glycosylation
420008	63	10	13.97	3.34	-2.06441	Down	1.37e-06	1.61e-05	jgi|Poptr1_1|420008|gw1.II.642.1|CDS chrom=LG_II strand=+ start=23625147 end=23634554 cdsStart=23625147 cdsEnd=23634554 sfCount=18 sfStarts=23625147,23625316,23625864,23626830,23627868,23628486,23628798,23629439,23629638,23629915,23630429,23630680,23631269,23632875,23633057,23633744,23633938,23634504, sfEnds=23625209,23625516,23625947,23626889,23627912,23628685,23629127,23629526,23629817,23630004…	-	-	-
819556	88	14	19.52	4.68	-2.06037	Down	9.98e-09	1.66e-07	jgi|Poptr1_1|819556|estExt_fgenesh4_pg.C_LG_VI1688|CDS chrom=LG_VI strand=- start=16418919 end=16424294 cdsStart=16419161 cdsEnd=16424232 sfCount=11 sfStarts=16418919,16419662,16420611,16420916,16421300,16421680,16421961,16423049,16423363,16423588,16424180, sfEnds=16419451,16420111,16420787,16421026,16421509,16421846,16422189,16423247,16423487,16424104,16424294,	-	-	-
836035	44	7	9.76	2.34	-2.06037	Down	6.29e-05	0.000501737	jgi|Poptr1_1|836035|estExt_fgenesh4_pm.C_LG_XIX0071|CDS chrom=LG_XIX strand=+ start=4124106 end=4132522 cdsStart=4124229 cdsEnd=4132299 sfCount=9 sfStarts=4124106,4124814,4125772,4126017,4127009,4127211,4128780,4131437,4132177, sfEnds=4124708,4124987,4125929,4126164,4127124,4127349,4128890,4131505,4132522,	GO:0016020//membrane	-	-
245011	44	7	9.76	2.34	-2.06037	Down	6.29e-05	0.000501406	jgi|Poptr1_1|245011|gw1.XIV.1754.1|CDS chrom=LG_XIV strand=- start=3647187 end=3648966 cdsStart=3647187 cdsEnd=3648966 sfCount=3 sfStarts=3648696,3648108,3647187, sfEnds=3648966,3648473,3647623,	-	-	-
425906	44	7	9.76	2.34	-2.06037	Down	6.29e-05	0.000501074	jgi|Poptr1_1|425906|gw1.III.2308.1|CDS chrom=LG_III strand=+ start=5733219 end=5736976 cdsStart=5733219 cdsEnd=5736976 sfCount=15 sfStarts=5733219,5733457,5733635,5733813,5733961,5734258,5734466,5734646,5734912,5735287,5735911,5736235,5736406,5736643,5736920, sfEnds=5733350,5733530,5733704,5733874,5734032,5734352,5734532,5734775,5735130,5735414,5736085,5736325,5736563,5736831,5736976,	-	-	-
835543	94	15	20.85	5.02	-2.05429	Down	3.22e-09	5.71e-08	jgi|Poptr1_1|835543|estExt_fgenesh4_pm.C_LG_XVI0377|CDS chrom=LG_XVI strand=- start=9671056 end=9677342 cdsStart=9671056 cdsEnd=9677342 sfCount=13 sfStarts=9671056,9672007,9672435,9673307,9673781,9674242,9675302,9675580,9675740,9676259,9676694,9676823,9677097, sfEnds=9671295,9672077,9672717,9673668,9674163,9674314,9675410,9675660,9675833,9676323,9676752,9676940,9677342,	GO:0005622//intracellular;GO:0005840//ribosome;GO:0005952//cAMP-dependent protein kinase complex;GO:0005956//protein kinase CK2 complex	GO:0004672//protein kinase activity;GO:0005524//ATP binding;GO:0004713//protein tyrosine kinase activity;GO:0003735//structural constituent of ribosome;GO:0003677//DNA binding;GO:0008170//N-methyltransferase activity;GO:0004674//protein serine/threonine kinase activity;GO:0004682//protein kinase CK2 activity;GO:0004691//cAMP-dependent protein kinase activity;GO:0008603//cAMP-dependent protein kin…	GO:0006468//protein amino acid phosphorylation;GO:0006412//translation;GO:0006306//DNA methylation
774203	144	23	31.93	7.69	-2.05386	Down	1.92e-13	5.86e-12	jgi|Poptr1_1|774203|fgenesh4_pg.C_LG_XIV000113|CDS chrom=LG_XIV strand=- start=1141997 end=1143430 cdsStart=1141997 cdsEnd=1143430 sfCount=2 sfStarts=1141997,1142581, sfEnds=1142535,1143430,	GO:0005634//nucleus	GO:0003676//nucleic acid binding;GO:0008270//zinc ion binding	-
828261	50	8	11.09	2.68	-2.04895	Down	1.97e-05	0.000176418	jgi|Poptr1_1|828261|estExt_fgenesh4_pg.C_1470038|CDS chrom=scaffold_147 strand=- start=283823 end=290526 cdsStart=284195 cdsEnd=290526 sfCount=16 sfStarts=283823,284395,284672,285097,285355,285630,285803,285931,286376,286622,286859,287051,287270,288124,288486,290470, sfEnds=284291,284579,284854,285270,285515,285711,285835,286169,286540,286766,286963,287173,288031,288360,288605,290526,	GO:0016020//membrane;GO:0016021//integral to membrane	GO:0005524//ATP binding;GO:0015662//ATPase activity, coupled to transmembrane movement of ions, phosphorylative mechanism;GO:0003824//catalytic activity;GO:0016887//ATPase activity;GO:0016820//hydrolase activity, acting on acid anhydrides, catalyzing transmembrane movement of substances;GO:0008553//hydrogen-exporting ATPase activity, phosphorylative mechanism	GO:0015992//proton transport;GO:0006812//cation transport;GO:0008152//metabolic process
653198	56	9	12.42	3.01	-2.04483	Down	6.22e-06	6.3e-05	jgi|Poptr1_1|653198|grail3.0023036001|CDS chrom=LG_VI strand=- start=7565325 end=7567804 cdsStart=7565600 cdsEnd=7567642 sfCount=2 sfStarts=7565325,7566732, sfEnds=7565711,7567804,	-	-	-
558693	93	15	20.62	5.02	-2.03829	Down	4.64e-09	8.03e-08	jgi|Poptr1_1|558693|eugene3.00050308|CDS chrom=LG_V strand=+ start=2619170 end=2629034 cdsStart=2619170 cdsEnd=2628327 sfCount=12 sfStarts=2619170,2619957,2620642,2622890,2624026,2624290,2624478,2625886,2626657,2628051,2628254,2628765, sfEnds=2619274,2620033,2622798,2623406,2624134,2624402,2624665,2626579,2627023,2628134,2628355,2629034,	-	-	-
797095	259	42	57.44	14.05	-2.03149	Down	8.37e-23	4.81e-21	jgi|Poptr1_1|797095|fgenesh4_pm.C_LG_I000098|CDS chrom=LG_I strand=+ start=2138708 end=2150475 cdsStart=2138708 cdsEnd=2150475 sfCount=17 sfStarts=2138708,2138958,2139251,2139410,2139603,2139828,2140042,2140237,2140405,2140631,2140883,2141161,2141358,2141566,2141874,2142171,2150365, sfEnds=2138869,2139166,2139317,2139502,2139746,2139916,2140147,2140324,2140523,2140792,2141079,2141264,2141467,2141…	GO:0009341//beta-galactosidase complex	GO:0005529//sugar binding;GO:0004565//beta-galactosidase activity	GO:0005975//carbohydrate metabolic process
837406	43	7	9.54	2.34	-2.02748	Down	9.1e-05	0.000698657	jgi|Poptr1_1|837406|estExt_fgenesh4_pm.C_1580023|CDS chrom=scaffold_158 strand=+ start=507270 end=516005 cdsStart=507270 cdsEnd=515794 sfCount=13 sfStarts=507270,508465,509495,509789,510487,510974,511408,512081,512281,513050,513509,515041,515468, sfEnds=507823,509214,509648,510133,510928,511335,511739,512204,512451,513424,514597,515307,516005,	GO:0016469//proton-transporting two-sector ATPase complex	GO:0005524//ATP binding;GO:0046933//hydrogen ion transporting ATP synthase activity, rotational mechanism;GO:0046961//proton-transporting ATPase activity, rotational mechanism;GO:0008270//zinc ion binding;GO:0016308//1-phosphatidylinositol-4-phosphate 5-kinase activity;GO:0004431	GO:0015986//ATP synthesis coupled proton transport
830119	43	7	9.54	2.34	-2.02748	Down	9.1e-05	0.000698213	jgi|Poptr1_1|830119|estExt_fgenesh4_pm.C_LG_II0262|CDS chrom=LG_II strand=- start=3719677 end=3729831 cdsStart=3719841 cdsEnd=3727279 sfCount=6 sfStarts=3719677,3724970,3725977,3726485,3727855,3729703, sfEnds=3720056,3725599,3726078,3727376,3727945,3729831,	-	-	-
829721	86	14	19.07	4.68	-2.02672	Down	2.07e-08	3.24e-07	jgi|Poptr1_1|829721|estExt_fgenesh4_pm.C_LG_I0832|CDS chrom=LG_I strand=- start=21336097 end=21350326 cdsStart=21336444 cdsEnd=21350326 sfCount=17 sfStarts=21336097,21338111,21338244,21338621,21338768,21343545,21344420,21345276,21345552,21346531,21348070,21348401,21348579,21349138,21349581,21349825,21350098, sfEnds=21336608,21338216,21338248,21338674,21338866,21343737,21344517,21345461,21345785,2…	-	-	-
177956	190	31	42.14	10.37	-2.02277	Down	5.16e-17	2.21e-15	jgi|Poptr1_1|177956|gw1.I.6556.1|CDS chrom=LG_I strand=+ start=535520 end=539786 cdsStart=535520 cdsEnd=539786 sfCount=6 sfStarts=535520,536262,536960,537810,538175,539325, sfEnds=536170,536345,537202,537977,538288,539786,	-	GO:0005524//ATP binding;GO:0008026//ATP-dependent helicase activity;GO:0003676//nucleic acid binding;GO:0004386//helicase activity	-
817040	98	16	21.73	5.35	-2.02208	Down	2.15e-09	3.9e-08	jgi|Poptr1_1|817040|estExt_fgenesh4_pg.C_LG_III0246|CDS chrom=LG_III strand=- start=3389013 end=3390703 cdsStart=3389233 cdsEnd=3390533 sfCount=5 sfStarts=3389013,3389510,3389684,3390042,3390386, sfEnds=3389371,3389567,3389943,3390240,3390703,	-	-	-
422188	49	8	10.87	2.68	-2.02005	Down	2.85e-05	0.00024586	jgi|Poptr1_1|422188|gw1.II.2822.1|CDS chrom=LG_II strand=+ start=22721884 end=22723693 cdsStart=22721884 cdsEnd=22723693 sfCount=7 sfStarts=22721884,22722363,22722702,22723076,22723265,22723450,22723591, sfEnds=22722191,22722462,22722968,22723153,22723366,22723499,22723693,	-	-	-
732312	55	9	12.2	3.01	-2.01905	Down	8.98e-06	8.79e-05	jgi|Poptr1_1|732312|estExt_Genewise1_v1.C_LG_XIV3469|CDS chrom=LG_XIV strand=+ start=8407669 end=8412671 cdsStart=8408616 cdsEnd=8412376 sfCount=9 sfStarts=8407669,8408486,8408725,8409085,8410054,8411099,8411426,8411887,8412344, sfEnds=8407694,8408627,8409006,8409232,8410992,8411337,8411499,8411998,8412671,	-	-	-
909738	116	19	25.73	6.35	-2.01862	Down	7.31e-11	1.57e-09	jgi|Poptr1_1|909738|e_gw1.XVIII.760.1|CDS chrom=LG_XVIII strand=+ start=2031468 end=2045306 cdsStart=2031468 cdsEnd=2045306 sfCount=22 sfStarts=2031468,2033553,2034270,2035442,2036744,2036950,2037790,2037927,2038124,2038514,2039058,2040520,2041343,2041858,2042323,2042583,2043168,2043499,2044342,2044555,2044960,2045159, sfEnds=2032300,2033668,2034481,2035561,2036872,2037075,2037845,2038026,2038226…	-	-	-
594762	122	20	27.06	6.69	-2.01608	Down	2.37e-11	5.38e-10	jgi|Poptr1_1|594762|eugene3.06620001|CDS chrom=scaffold_662 strand=+ start=111453 end=121607 cdsStart=111453 cdsEnd=121607 sfCount=22 sfStarts=111453,111950,112171,112394,112743,112929,113506,113768,113993,114275,114710,114878,115480,116662,117090,117342,119228,119549,120004,120462,120892,121308, sfEnds=111869,112069,112284,112546,112843,113025,113615,113871,114172,114618,114780,115347,116349,116…	GO:0009342//glutamate synthase complex (NADPH)	GO:0016491//oxidoreductase activity;GO:0015036//disulfide oxidoreductase activity;GO:0015930//glutamate synthase activity;GO:0016639//oxidoreductase activity, acting on the CH-NH2 group of donors, NAD or NADP as acceptor;GO:0004355//glutamate synthase (NADPH) activity;GO:0045181//glutamate synthase activity, NADH or NADPH as acceptor	GO:0006118//electron transport;GO:0005975//carbohydrate metabolic process;GO:0008152//metabolic process;GO:0006537//glutamate biosynthetic process;GO:0006807//nitrogen compound metabolic process
572866	146	24	32.38	8.03	-2.01163	Down	2.66e-13	7.97e-12	jgi|Poptr1_1|572866|eugene3.00140911|CDS chrom=LG_XIV strand=+ start=7086569 end=7093149 cdsStart=7086569 cdsEnd=7092752 sfCount=10 sfStarts=7086569,7086985,7087814,7088040,7088917,7090067,7090547,7090796,7091078,7091349, sfEnds=7086877,7087121,7087927,7088123,7089096,7090208,7090707,7090922,7091158,7093149,	-	-	-
773472	152	25	33.71	8.36	-2.0116	Down	8.68e-14	2.81e-12	jgi|Poptr1_1|773472|fgenesh4_pg.C_LG_XII001247|CDS chrom=LG_XII strand=+ start=13653786 end=13656812 cdsStart=13653786 cdsEnd=13656812 sfCount=4 sfStarts=13653786,13654115,13655477,13656007, sfEnds=13654066,13654167,13655755,13656812,	-	GO:0005554	-
577435	60	10	13.31	3.34	-1.99459	Down	4.1e-06	4.37e-05	jgi|Poptr1_1|577435|eugene3.00170177|CDS chrom=LG_XVII strand=+ start=1871172 end=1873256 cdsStart=1871172 cdsEnd=1873256 sfCount=3 sfStarts=1871172,1871869,1872186, sfEnds=1871203,1871890,1873256,	-	-	-
1085094	54	9	11.98	3.01	-1.99279	Down	1.29e-05	0.00012142	jgi|Poptr1_1|1085094|estExt_Genewise1Plus.C_LG_VIII1653|CDS chrom=LG_VIII strand=- start=8043590 end=8046181 cdsStart=8043873 cdsEnd=8046127 sfCount=2 sfStarts=8043590,8044890, sfEnds=8044743,8046181,	-	-	-
722931	54	9	11.98	3.01	-1.99279	Down	1.29e-05	0.000121325	jgi|Poptr1_1|722931|estExt_Genewise1_v1.C_LG_IX3545|CDS chrom=LG_IX strand=+ start=7160602 end=7166683 cdsStart=7160729 cdsEnd=7165893 sfCount=10 sfStarts=7160602,7161599,7161945,7163394,7163564,7163995,7164303,7165475,7165837,7166338, sfEnds=7161100,7161833,7162429,7163489,7163647,7164229,7164460,7165753,7166025,7166683,	-	-	-
217877	54	9	11.98	3.01	-1.99279	Down	1.29e-05	0.000121231	jgi|Poptr1_1|217877|gw1.VII.2182.1|CDS chrom=LG_VII strand=+ start=5167597 end=5173741 cdsStart=5167597 cdsEnd=5173741 sfCount=9 sfStarts=5167597,5168749,5169794,5170039,5170336,5172767,5172959,5173459,5173649, sfEnds=5168253,5169090,5169934,5170218,5170491,5172868,5173087,5173563,5173741,	-	GO:0005524//ATP binding;GO:0005351//sugar:hydrogen symporter activity;GO:0016887//ATPase activity;GO:0000166//nucleotide binding;GO:0017111//nucleoside-triphosphatase activity	GO:0009401//phosphoenolpyruvate-dependent sugar phosphotransferase system
286725	42	7	9.31	2.34	-1.99227	Down	0.00013141	0.000960407	jgi|Poptr1_1|286725|gw1.40.485.1|CDS chrom=scaffold_40 strand=+ start=1444786 end=1448914 cdsStart=1444786 cdsEnd=1448914 sfCount=11 sfStarts=1444786,1445042,1445398,1445598,1446034,1446512,1447339,1447684,1448065,1448252,1448786, sfEnds=1444960,1445112,1445478,1445665,1446136,1446663,1447456,1447788,1448166,1448389,1448914,	-	-	-
576812	42	7	9.31	2.34	-1.99227	Down	0.00013141	0.000959825	jgi|Poptr1_1|576812|eugene3.00160947|CDS chrom=LG_XVI strand=- start=9003386 end=9006944 cdsStart=9003891 cdsEnd=9006944 sfCount=7 sfStarts=9003386,9004851,9005042,9005212,9005523,9005707,9006672, sfEnds=9003998,9004946,9005140,9005289,9005624,9005799,9006944,	-	GO:0046872//metal ion binding	-
827801	42	7	9.31	2.34	-1.99227	Down	0.00013141	0.000959244	jgi|Poptr1_1|827801|estExt_fgenesh4_pg.C_1230048|CDS chrom=scaffold_123 strand=- start=437147 end=443932 cdsStart=437147 cdsEnd=443713 sfCount=9 sfStarts=437147,437284,437520,437854,440418,440562,440986,441772,443513, sfEnds=437223,437395,437685,439931,440501,440850,441239,441981,443932,	-	-	-
834301	120	20	26.61	6.69	-1.99189	Down	4.87e-11	1.06e-09	jgi|Poptr1_1|834301|estExt_fgenesh4_pm.C_LG_XII0234|CDS chrom=LG_XII strand=+ start=8340040 end=8345828 cdsStart=8340583 cdsEnd=8345389 sfCount=7 sfStarts=8340040,8340576,8341402,8342033,8342760,8344276,8345155, sfEnds=8340205,8341221,8341612,8342321,8343140,8344353,8345828,	-	GO:0008168//methyltransferase activity;GO:0005554	-
1084021	48	8	10.64	2.68	-1.98919	Down	4.11e-05	0.00034413	jgi|Poptr1_1|1084021|estExt_Genewise1Plus.C_LG_VII3943|CDS chrom=LG_VII strand=+ start=12594455 end=12598081 cdsStart=12594455 cdsEnd=12598081 sfCount=7 sfStarts=12594455,12594602,12594978,12595132,12596265,12597174,12597713, sfEnds=12594502,12594779,12595054,12595638,12596804,12597386,12598081,	-	-	-
821728	257	43	57	14.38	-1.9869	Down	4.84e-22	2.66e-20	jgi|Poptr1_1|821728|estExt_fgenesh4_pg.C_LG_X0160|CDS chrom=LG_X strand=- start=2108615 end=2110121 cdsStart=2109057 cdsEnd=2110121 sfCount=2 sfStarts=2108615,2109055, sfEnds=2108984,2110121,	-	GO:0031072//heat shock protein binding;GO:0051082//unfolded protein binding	GO:0006457//protein folding
829689	2043	343	453.08	114.71	-1.98177	Down	9.27e-164	2.28e-161	jgi|Poptr1_1|829689|estExt_fgenesh4_pm.C_LG_I0779|CDS chrom=LG_I strand=+ start=19917153 end=19920545 cdsStart=19917153 cdsEnd=19920271 sfCount=6 sfStarts=19917153,19917421,19918049,19918316,19918904,19920084, sfEnds=19917309,19917848,19918128,19918494,19918978,19920545,	-	-	-
427412	178	30	39.48	10.03	-1.9768	Down	1.35e-15	5.03e-14	jgi|Poptr1_1|427412|gw1.VI.1084.1|CDS chrom=LG_VI strand=+ start=2449091 end=2453118 cdsStart=2449091 cdsEnd=2453118 sfCount=11 sfStarts=2449091,2450078,2450460,2450898,2451025,2451326,2451618,2451997,2452478,2452856,2453029, sfEnds=2449278,2450355,2450674,2450921,2451205,2451545,2451753,2452186,2452521,2452918,2453118,	-	-	-
580109	71	12	15.75	4.01	-1.97368	Down	5.96e-07	7.5e-06	jgi|Poptr1_1|580109|eugene3.01180044|CDS chrom=scaffold_118 strand=+ start=393120 end=396707 cdsStart=393225 cdsEnd=396362 sfCount=9 sfStarts=393120,393339,393918,394473,394587,394815,395253,395476,396182, sfEnds=393263,393512,394183,394482,394730,394982,395322,395557,396707,	-	GO:0004749//ribose phosphate diphosphokinase activity;GO:0016978;GO:0016740//transferase activity	GO:0009116//nucleoside metabolic process;GO:0009156//ribonucleoside monophosphate biosynthetic process;GO:0009165//nucleotide biosynthetic process
767785	154	26	34.15	8.7	-1.9728	Down	1.19e-13	3.77e-12	jgi|Poptr1_1|767785|fgenesh4_pg.C_LG_IX000836|CDS chrom=LG_IX strand=- start=5396036 end=5398797 cdsStart=5396036 cdsEnd=5398797 sfCount=2 sfStarts=5396036,5397775, sfEnds=5397163,5398797,	-	-	-
590023	485	82	107.56	27.42	-1.97184	Down	6.67e-40	6.94e-38	jgi|Poptr1_1|590023|eugene3.00290206|CDS chrom=scaffold_29 strand=- start=2282950 end=2283687 cdsStart=2282950 cdsEnd=2283687 sfCount=1 sfStarts=2282950, sfEnds=2283687,	GO:0000151//ubiquitin ligase complex	GO:0004842//ubiquitin-protein ligase activity;GO:0008270//zinc ion binding	GO:0016567//protein ubiquitination
287102	420	71	93.14	23.75	-1.97147	Down	9.13e-35	8.1e-33	jgi|Poptr1_1|287102|gw1.40.862.1|CDS chrom=scaffold_40 strand=- start=2366748 end=2372408 cdsStart=2366748 cdsEnd=2372408 sfCount=9 sfStarts=2372213,2371021,2370095,2369914,2369756,2368989,2367381,2367098,2366748, sfEnds=2372408,2371139,2370751,2369991,2369845,2369126,2367557,2367295,2366990,	GO:0005622//intracellular;GO:0005840//ribosome	GO:0003676//nucleic acid binding;GO:0003735//structural constituent of ribosome;GO:0003723//RNA binding	GO:0006412//translation
712353	242	41	53.67	13.71	-1.96889	Down	1.3e-20	6.72e-19	jgi|Poptr1_1|712353|estExt_Genewise1_v1.C_LG_III1771|CDS chrom=LG_III strand=- start=9987147 end=9993197 cdsStart=9987378 cdsEnd=9991251 sfCount=19 sfStarts=9987147,9987797,9988376,9988615,9988847,9989030,9989271,9989658,9989860,9990027,9990195,9990480,9990717,9990889,9991084,9991244,9991895,9992017,9993005, sfEnds=9987598,9987872,9988407,9988731,9988910,9989098,9989336,9989766,9989926,9990079,99…	GO:0005952//cAMP-dependent protein kinase complex;GO:0005956//protein kinase CK2 complex	GO:0004672//protein kinase activity;GO:0004682//protein kinase CK2 activity;GO:0004691//cAMP-dependent protein kinase activity;GO:0008603//cAMP-dependent protein kinase regulator activity;GO:0008605//protein kinase CK2 regulator activity	-
552695	118	20	26.17	6.69	-1.96784	Down	9.97e-11	2.11e-09	jgi|Poptr1_1|552695|eugene3.00002010|CDS chrom=LG_II strand=+ start=18334297 end=18336093 cdsStart=18334297 cdsEnd=18336093 sfCount=2 sfStarts=18334297,18334876, sfEnds=18334518,18336093,	-	GO:0003676//nucleic acid binding	-
828245	171	29	37.92	9.7	-1.9669	Down	5.9e-15	2.11e-13	jgi|Poptr1_1|828245|estExt_fgenesh4_pg.C_1460020|CDS chrom=scaffold_146 strand=- start=213060 end=225890 cdsStart=213077 cdsEnd=225802 sfCount=9 sfStarts=213060,213728,213769,214562,217657,218385,223621,224434,225056, sfEnds=213671,213731,213970,214661,217743,218626,223703,224557,225890,	-	GO:0008080//N-acetyltransferase activity;GO:0003677//DNA binding	GO:0006355//regulation of transcription, DNA-dependent
773029	47	8	10.42	2.68	-1.95905	Down	5.91e-05	0.000474763	jgi|Poptr1_1|773029|fgenesh4_pg.C_LG_XII000804|CDS chrom=LG_XII strand=- start=10037635 end=10039768 cdsStart=10037635 cdsEnd=10039768 sfCount=4 sfStarts=10037635,10038525,10038772,10039663, sfEnds=10038168,10038602,10039127,10039768,	GO:0000151//ubiquitin ligase complex	GO:0004842//ubiquitin-protein ligase activity;GO:0008270//zinc ion binding	GO:0016567//protein ubiquitination
1085568	99	17	21.96	5.69	-1.94838	Down	4.19e-09	7.3e-08	jgi|Poptr1_1|1085568|estExt_Genewise1Plus.C_LG_VIII2382|CDS chrom=LG_VIII strand=- start=12018611 end=12022136 cdsStart=12019021 cdsEnd=12022136 sfCount=8 sfStarts=12018611,12019216,12019443,12019742,12019970,12020428,12021525,12021990, sfEnds=12019120,12019322,12019554,12019830,12020105,12021416,12021953,12022136,	-	-	-
260106	145	25	32.16	8.36	-1.94369	Down	1.05e-12	2.82e-11	jgi|Poptr1_1|260106|gw1.XVIII.647.1|CDS chrom=LG_XVIII strand=- start=767541 end=773343 cdsStart=767541 cdsEnd=773343 sfCount=13 sfStarts=772954,772558,772250,772061,771802,771425,770789,770480,769879,769297,768693,768301,767541, sfEnds=773343,772710,772462,772150,771918,771694,770945,770557,769979,769467,768767,768423,767855,	-	-	-
181203	87	15	19.29	5.02	-1.94209	Down	4.02e-08	5.97e-07	jgi|Poptr1_1|181203|gw1.I.9803.1|CDS chrom=LG_I strand=- start=11231566 end=11239192 cdsStart=11231566 cdsEnd=11239192 sfCount=19 sfStarts=11238953,11238554,11238312,11237924,11237165,11236985,11236380,11235583,11235417,11235145,11235017,11234802,11234198,11233502,11233274,11233094,11232901,11232064,11231566, sfEnds=11239192,11238841,11238491,11238184,11237297,11237075,11236482,11235686,11235510,…	-	-	-
423746	162	28	35.93	9.36	-1.94061	Down	5.22e-14	1.72e-12	jgi|Poptr1_1|423746|gw1.III.148.1|CDS chrom=LG_III strand=+ start=18431852 end=18432919 cdsStart=18431852 cdsEnd=18432919 sfCount=1 sfStarts=18431852, sfEnds=18432919,	-	-	-
226184	104	18	23.06	6.02	-1.93756	Down	1.93e-09	3.52e-08	jgi|Poptr1_1|226184|gw1.X.881.1|CDS chrom=LG_X strand=+ start=14782217 end=14784321 cdsStart=14782217 cdsEnd=14784321 sfCount=6 sfStarts=14782217,14782314,14783554,14783740,14783956,14784225, sfEnds=14782265,14782615,14783647,14783864,14784053,14784321,	-	-	-
809534	202	35	44.8	11.71	-1.93576	Down	4.26e-17	1.83e-15	jgi|Poptr1_1|809534|fgenesh4_pm.C_LG_XIX000099|CDS chrom=LG_XIX strand=+ start=5053025 end=5059688 cdsStart=5053025 cdsEnd=5059688 sfCount=16 sfStarts=5053025,5053757,5053971,5054169,5054322,5054538,5054729,5055009,5055148,5055390,5055721,5057265,5057539,5058820,5059100,5059629, sfEnds=5053426,5053882,5054044,5054238,5054377,5054609,5054823,5055075,5055277,5055676,5055831,5057439,5057629,5058977,…	GO:0005952//cAMP-dependent protein kinase complex;GO:0005956//protein kinase CK2 complex	GO:0004672//protein kinase activity;GO:0005524//ATP binding;GO:0004674//protein serine/threonine kinase activity;GO:0004682//protein kinase CK2 activity;GO:0004691//cAMP-dependent protein kinase activity;GO:0008603//cAMP-dependent protein kinase regulator activity;GO:0008605//protein kinase CK2 regulator activity	GO:0006468//protein amino acid phosphorylation
821292	138	24	30.6	8.03	-1.93006	Down	4.6e-12	1.11e-10	jgi|Poptr1_1|821292|estExt_fgenesh4_pg.C_LG_IX0734|CDS chrom=LG_IX strand=- start=4704544 end=4710705 cdsStart=4704915 cdsEnd=4710705 sfCount=12 sfStarts=4704544,4705767,4705959,4706968,4707115,4708036,4708203,4708544,4708714,4708926,4709134,4710396, sfEnds=4705013,4705876,4706087,4707034,4707197,4708117,4708279,4708627,4708783,4709014,4709826,4710705,	-	GO:0005509//calcium ion binding;GO:0008233//peptidase activity	GO:0006508//proteolysis
830729	46	8	10.2	2.68	-1.92826	Down	8.48e-05	0.000655589	jgi|Poptr1_1|830729|estExt_fgenesh4_pm.C_LG_III0191|CDS chrom=LG_III strand=- start=7596844 end=7602469 cdsStart=7597194 cdsEnd=7601592 sfCount=8 sfStarts=7596844,7597888,7598166,7599365,7600841,7601366,7602303,7602465, sfEnds=7597332,7597977,7598245,7599448,7600889,7601639,7602417,7602469,	-	-	-
1107225	46	8	10.2	2.68	-1.92826	Down	8.48e-05	0.000655169	jgi|Poptr1_1|1107225|estExt_Genewise1Plus.C_LG_XVIII2994|CDS chrom=LG_XVIII strand=+ start=12007830 end=12012088 cdsStart=12007830 cdsEnd=12011650 sfCount=4 sfStarts=12007830,12008601,12008975,12010890, sfEnds=12008552,12008698,12009093,12012088,	-	-	-
554318	63	11	13.97	3.68	-1.92455	Down	3.83e-06	4.1e-05	jgi|Poptr1_1|554318|eugene3.00030951|CDS chrom=LG_III strand=+ start=11651885 end=11654179 cdsStart=11651885 cdsEnd=11653882 sfCount=2 sfStarts=11651885, sfEnds=11654179,	-	-	-
818953	80	14	17.74	4.68	-1.92243	Down	1.78e-07	2.43e-06	jgi|Poptr1_1|818953|estExt_fgenesh4_pg.C_LG_VI0143|CDS chrom=LG_VI strand=- start=1002099 end=1006220 cdsStart=1002349 cdsEnd=1005479 sfCount=5 sfStarts=1002099,1003074,1005258,1005759,1005996, sfEnds=1002362,1004268,1005480,1005889,1006220,	-	GO:0003676//nucleic acid binding	-
784527	57	10	12.64	3.34	-1.92008	Down	1.2e-05	0.000113731	jgi|Poptr1_1|784527|fgenesh4_pg.C_scaffold_130000035|CDS chrom=scaffold_130 strand=- start=403000 end=404322 cdsStart=403000 cdsEnd=404322 sfCount=1 sfStarts=403000, sfEnds=404322,	-	GO:0004623//phospholipase A2 activity;GO:0005509//calcium ion binding	GO:0016042//lipid catabolic process
551971	57	10	12.64	3.34	-1.92008	Down	1.2e-05	0.000113642	jgi|Poptr1_1|551971|eugene3.00021286|CDS chrom=LG_II strand=+ start=10390761 end=10391858 cdsStart=10390761 cdsEnd=10391858 sfCount=1 sfStarts=10390761, sfEnds=10391858,	GO:0005634//nucleus	GO:0003677//DNA binding	-
893031	473	83	104.9	27.76	-1.91794	Down	1.22e-37	1.23e-35	jgi|Poptr1_1|893031|e_gw1.XIII.1689.1|CDS chrom=LG_XIII strand=+ start=3390757 end=3395608 cdsStart=3390757 cdsEnd=3395608 sfCount=14 sfStarts=3390757,3390933,3391590,3391780,3392024,3392736,3393553,3393708,3393895,3394189,3394575,3394737,3395047,3395321, sfEnds=3390832,3390973,3391659,3391928,3392119,3392806,3393614,3393771,3393979,3394315,3394648,3394785,3395171,3395608,	-	-	-
557410	74	13	16.41	4.35	-1.91549	Down	5.56e-07	7.06e-06	jgi|Poptr1_1|557410|eugene3.00090670|CDS chrom=LG_IX strand=- start=4082995 end=4087127 cdsStart=4083187 cdsEnd=4086853 sfCount=10 sfStarts=4082995,4084100,4084377,4084625,4084705,4085022,4085177,4085338,4086113,4086619, sfEnds=4083426,4084303,4084550,4084628,4084839,4085104,4085254,4085994,4086231,4087127,	-	GO:0003676//nucleic acid binding;GO:0003723//RNA binding	-
572302	125	22	27.72	7.36	-1.91315	Down	6.17e-11	1.34e-09	jgi|Poptr1_1|572302|eugene3.00140347|CDS chrom=LG_XIV strand=+ start=2807453 end=2815504 cdsStart=2807453 cdsEnd=2815288 sfCount=10 sfStarts=2807453,2807622,2807867,2809798,2810169,2810391,2811463,2812600,2812808,2815128, sfEnds=2807520,2807720,2808069,2809991,2810274,2810704,2811867,2812681,2814382,2815504,	-	-	-
799617	193	34	42.8	11.37	-1.91238	Down	3.72e-16	1.48e-14	jgi|Poptr1_1|799617|fgenesh4_pm.C_LG_III000082|CDS chrom=LG_III strand=+ start=4145936 end=4147673 cdsStart=4145936 cdsEnd=4147673 sfCount=3 sfStarts=4145936,4146714,4147380, sfEnds=4146027,4146945,4147673,	-	-	-
776575	68	12	15.08	4.01	-1.91096	Down	1.74e-06	1.99e-05	jgi|Poptr1_1|776575|fgenesh4_pg.C_LG_XV001003|CDS chrom=LG_XV strand=- start=9388564 end=9398874 cdsStart=9388564 cdsEnd=9398874 sfCount=18 sfStarts=9388564,9389029,9389965,9390368,9390684,9391233,9391432,9392032,9392178,9392596,9392793,9393019,9394235,9395025,9396175,9397627,9397916,9398394, sfEnds=9388653,9389109,9390123,9390419,9390772,9391318,9391633,9392073,9392219,9392688,9392933,9393111,93…	GO:0005952//cAMP-dependent protein kinase complex;GO:0005956//protein kinase CK2 complex	GO:0004672//protein kinase activity;GO:0005524//ATP binding;GO:0004713//protein tyrosine kinase activity;GO:0004674//protein serine/threonine kinase activity;GO:0004682//protein kinase CK2 activity;GO:0004691//cAMP-dependent protein kinase activity;GO:0008603//cAMP-dependent protein kinase regulator activity;GO:0008605//protein kinase CK2 regulator activity	GO:0006468//protein amino acid phosphorylation
816849	51	9	11.31	3.01	-1.90976	Down	3.81e-05	0.000321512	jgi|Poptr1_1|816849|estExt_fgenesh4_pg.C_LG_II2234|CDS chrom=LG_II strand=- start=21281412 end=21294192 cdsStart=21281665 cdsEnd=21294192 sfCount=24 sfStarts=21281412,21281933,21282778,21283032,21283875,21284204,21284361,21284909,21285095,21285943,21287032,21287587,21288066,21289012,21289290,21289440,21289597,21290684,21291229,21292195,21292925,21293462,21293748,21293904, sfEnds=21281847,21282044…	-	GO:0005515//protein binding;GO:0004252//serine-type endopeptidase activity	GO:0006508//proteolysis
760175	51	9	11.31	3.01	-1.90976	Down	3.81e-05	0.000321287	jgi|Poptr1_1|760175|fgenesh4_pg.C_LG_V000227|CDS chrom=LG_V strand=+ start=1824296 end=1828510 cdsStart=1824296 cdsEnd=1828510 sfCount=8 sfStarts=1824296,1824541,1825783,1826397,1827078,1827678,1827977,1828271, sfEnds=1824380,1824890,1826298,1826632,1827342,1827815,1828021,1828510,	-	GO:0003840//gamma-glutamyltransferase activity	-
230718	62	11	13.75	3.68	-1.90165	Down	5.46e-06	5.63e-05	jgi|Poptr1_1|230718|gw1.X.5415.1|CDS chrom=LG_X strand=+ start=7821126 end=7834162 cdsStart=7821126 cdsEnd=7834162 sfCount=27 sfStarts=7821126,7821329,7821595,7823426,7823676,7825094,7825343,7826177,7826529,7827745,7827971,7828145,7828324,7828612,7828902,7829749,7830050,7830244,7830387,7831158,7831439,7831597,7832181,7832479,7833187,7833628,7833862, sfEnds=7821248,7821394,7821656,7823507,7823786,…	GO:0016020//membrane;GO:0016021//integral to membrane	GO:0005524//ATP binding;GO:0015662//ATPase activity, coupled to transmembrane movement of ions, phosphorylative mechanism;GO:0016887//ATPase activity;GO:0004012//phospholipid-translocating ATPase activity	GO:0006812//cation transport
828990	62	11	13.75	3.68	-1.90165	Down	5.46e-06	5.63e-05	jgi|Poptr1_1|828990|estExt_fgenesh4_pg.C_10380001|CDS chrom=scaffold_1038 strand=+ start=2905 end=3766 cdsStart=2972 cdsEnd=3636 sfCount=2 sfStarts=2905,3150, sfEnds=3015,3766,	-	-	-
732453	152	27	33.71	9.03	-1.90038	Down	6.5e-13	1.83e-11	jgi|Poptr1_1|732453|estExt_Genewise1_v1.C_LG_XIV3724|CDS chrom=LG_XIV strand=+ start=9182639 end=9186065 cdsStart=9182639 cdsEnd=9185961 sfCount=8 sfStarts=9182639,9183060,9183680,9183952,9185136,9185304,9185584,9185889, sfEnds=9182993,9183579,9183847,9184131,9185212,9185474,9185704,9186065,	-	GO:0003676//nucleic acid binding	-
732530	163	29	36.15	9.7	-1.89794	Down	9.85e-14	3.17e-12	jgi|Poptr1_1|732530|estExt_Genewise1_v1.C_LG_XIV3908|CDS chrom=LG_XIV strand=- start=9947501 end=9949338 cdsStart=9947683 cdsEnd=9949266 sfCount=1 sfStarts=9947501, sfEnds=9949338,	GO:0016021//integral to membrane	GO:0005215//transporter activity	GO:0006810//transport
766456	191	34	42.36	11.37	-1.89747	Down	7.47e-16	2.9e-14	jgi|Poptr1_1|766456|fgenesh4_pg.C_LG_VIII001470|CDS chrom=LG_VIII strand=+ start=11282435 end=11290232 cdsStart=11282435 cdsEnd=11290232 sfCount=10 sfStarts=11282435,11283180,11284069,11284300,11284494,11285407,11287625,11288460,11289497,11290176, sfEnds=11282482,11283266,11284158,11284386,11284592,11287497,11287771,11288929,11289650,11290232,	-	GO:0008270//zinc ion binding	-
825753	45	8	9.98	2.68	-1.89681	Down	0.000121224	0.000902928	jgi|Poptr1_1|825753|estExt_fgenesh4_pg.C_LG_XVIII0431|CDS chrom=LG_XVIII strand=- start=5775921 end=5780043 cdsStart=5775921 cdsEnd=5779267 sfCount=11 sfStarts=5775921,5776522,5776770,5777359,5777810,5778134,5778588,5778782,5779073,5779778,5780038, sfEnds=5775978,5776683,5776891,5777579,5777948,5778360,5778699,5778982,5779301,5779877,5780043,	-	GO:0016787//hydrolase activity;GO:0003993//acid phosphatase activity	-
566702	45	8	9.98	2.68	-1.89681	Down	0.000121224	0.000902371	jgi|Poptr1_1|566702|eugene3.00101260|CDS chrom=LG_X strand=+ start=13099989 end=13105223 cdsStart=13099989 cdsEnd=13105157 sfCount=10 sfStarts=13099989,13101013,13102557,13102921,13103114,13103401,13103726,13103962,13104215,13104519, sfEnds=13100384,13102460,13102833,13103009,13103222,13103610,13103851,13104060,13104406,13105223,	GO:0016020//membrane;GO:0016021//integral to membrane	GO:0005524//ATP binding;GO:0015662//ATPase activity, coupled to transmembrane movement of ions, phosphorylative mechanism;GO:0003824//catalytic activity;GO:0016887//ATPase activity;GO:0004012//phospholipid-translocating ATPase activity	GO:0006812//cation transport;GO:0008152//metabolic process
725686	45	8	9.98	2.68	-1.89681	Down	0.000121224	0.000901814	jgi|Poptr1_1|725686|estExt_Genewise1_v1.C_LG_X3939|CDS chrom=LG_X strand=- start=2082160 end=2087616 cdsStart=2082494 cdsEnd=2087616 sfCount=18 sfStarts=2082160,2082265,2082754,2083202,2083876,2084068,2084224,2084476,2084690,2084873,2085043,2085570,2086044,2086429,2086920,2087173,2087388,2087483, sfEnds=2082217,2082666,2082831,2083266,2083953,2084134,2084284,2084559,2084791,2084958,2085106,208566…	-	GO:0003847//1-alkyl-2-acetylglycerophosphocholine esterase activity	-
1097575	73	13	16.19	4.35	-1.89602	Down	7.92e-07	9.74e-06	jgi|Poptr1_1|1097575|estExt_Genewise1Plus.C_LG_XIII3160|CDS chrom=LG_XIII strand=- start=12095006 end=12096706 cdsStart=12095053 cdsEnd=12096706 sfCount=3 sfStarts=12095006,12095807,12096073, sfEnds=12095678,12095953,12096706,	-	-	-
268247	174	31	38.59	10.37	-1.89581	Down	1.5e-14	5.18e-13	jgi|Poptr1_1|268247|gw1.131.249.1|CDS chrom=scaffold_131 strand=+ start=616516 end=619831 cdsStart=616516 cdsEnd=619831 sfCount=6 sfStarts=616516,617247,617619,618589,619187,619511, sfEnds=616802,617404,617830,619082,619235,619831,	-	-	-
837528	56	10	12.42	3.34	-1.89475	Down	1.72e-05	0.000155269	jgi|Poptr1_1|837528|estExt_fgenesh4_pm.C_1930016|CDS chrom=scaffold_193 strand=- start=305465 end=310313 cdsStart=305696 cdsEnd=310215 sfCount=12 sfStarts=305465,306096,306578,307322,307546,308021,308679,308860,309274,309676,309901,310141, sfEnds=306016,306269,306663,307441,307576,308096,308766,308921,309350,309778,309965,310313,	-	GO:0003676//nucleic acid binding	-
830445	151	27	33.49	9.03	-1.89093	Down	9.21e-13	2.5e-11	jgi|Poptr1_1|830445|estExt_fgenesh4_pm.C_LG_II0867|CDS chrom=LG_II strand=- start=15374489 end=15381673 cdsStart=15376376 cdsEnd=15381564 sfCount=16 sfStarts=15374489,15375632,15376738,15376952,15377296,15377740,15378482,15378744,15379279,15379558,15379783,15380112,15380451,15380892,15381239,15381467, sfEnds=15374898,15376414,15376876,15377196,15377617,15377964,15378648,15378860,15379452,15379653…	-	GO:0016157//sucrose synthase activity	GO:0005985//sucrose metabolic process;GO:0009058//biosynthetic process
566940	123	22	27.28	7.36	-1.89007	Down	1.24e-10	2.6e-09	jgi|Poptr1_1|566940|eugene3.00101498|CDS chrom=LG_X strand=- start=14700156 end=14705693 cdsStart=14701284 cdsEnd=14705693 sfCount=9 sfStarts=14700156,14701230,14702051,14702798,14703252,14703642,14704488,14704930,14705182, sfEnds=14700453,14701433,14702183,14703101,14703403,14703867,14704728,14705065,14705693,	GO:0016020//membrane	GO:0008757//S-adenosylmethionine-dependent methyltransferase activity;GO:0008168//methyltransferase activity;GO:0005554;GO:0005215//transporter activity	GO:0006810//transport
651462	67	12	14.86	4.01	-1.88976	Down	2.48e-06	2.73e-05	jgi|Poptr1_1|651462|grail3.0002017101|CDS chrom=LG_V strand=- start=11960442 end=11963203 cdsStart=11960488 cdsEnd=11962961 sfCount=6 sfStarts=11960442,11960683,11961804,11962242,11962869,11963060, sfEnds=11960526,11960859,11961893,11962307,11962961,11963203,	-	-	-
1071903	307	55	68.08	18.39	-1.88831	Down	1.77e-24	1.08e-22	jgi|Poptr1_1|1071903|estExt_Genewise1Plus.C_LG_II1626|CDS chrom=LG_II strand=- start=8583500 end=8590684 cdsStart=8583690 cdsEnd=8590684 sfCount=11 sfStarts=8583500,8583845,8584095,8585281,8585905,8586885,8587822,8589229,8589563,8590120,8590401, sfEnds=8583763,8584013,8584328,8585559,8586181,8587183,8587995,8589438,8589626,8590266,8590684,	-	-	-
552368	117	21	25.95	7.02	-1.88619	Down	3.82e-10	7.67e-09	jgi|Poptr1_1|552368|eugene3.00021683|CDS chrom=LG_II strand=+ start=14182314 end=14185247 cdsStart=14182314 cdsEnd=14185001 sfCount=4 sfStarts=14182314,14182695,14183007,14184585, sfEnds=14182352,14182919,14184458,14185247,	-	-	-
1119008	50	9	11.09	3.01	-1.88142	Down	5.43e-05	0.000438883	jgi|Poptr1_1|1119008|estExt_Genewise1Plus.C_2630036|CDS chrom=scaffold_263 strand=- start=88401 end=90043 cdsStart=88565 cdsEnd=90043 sfCount=5 sfStarts=88401,88503,88963,89279,89792, sfEnds=88458,88829,89180,89515,90043,	-	-	-
1097224	50	9	11.09	3.01	-1.88142	Down	5.43e-05	0.000438589	jgi|Poptr1_1|1097224|estExt_Genewise1Plus.C_LG_XIII2353|CDS chrom=LG_XIII strand=- start=7526051 end=7532417 cdsStart=7526369 cdsEnd=7532417 sfCount=8 sfStarts=7526051,7526094,7526639,7527371,7527581,7528193,7528703,7532199, sfEnds=7526072,7526557,7527253,7527472,7527808,7528624,7529146,7532417,	-	-	-
592282	172	31	38.14	10.37	-1.87889	Down	3e-14	1.02e-12	jgi|Poptr1_1|592282|eugene3.00410125|CDS chrom=scaffold_41 strand=+ start=1358684 end=1361184 cdsStart=1358684 cdsEnd=1360633 sfCount=2 sfStarts=1358684, sfEnds=1361184,	GO:0016020//membrane	GO:0005216//ion channel activity	GO:0006811//ion transport
714557	61	11	13.53	3.68	-1.87838	Down	7.76e-06	7.69e-05	jgi|Poptr1_1|714557|estExt_Genewise1_v1.C_LG_IV4530|CDS chrom=LG_IV strand=+ start=11516831 end=11523076 cdsStart=11516864 cdsEnd=11522942 sfCount=12 sfStarts=11516831,11518710,11519010,11519234,11519680,11520068,11520639,11521343,11521562,11522191,11522532,11522794, sfEnds=11516998,11518856,11519124,11519328,11519783,11520105,11520874,11521436,11521752,11522410,11522699,11523076,	-	-	-
657068	155	28	34.37	9.36	-1.87657	Down	6.03e-13	1.7e-11	jgi|Poptr1_1|657068|grail3.0009000601|CDS chrom=LG_VIII strand=- start=9688958 end=9691892 cdsStart=9688958 cdsEnd=9691890 sfCount=3 sfStarts=9688958,9691081,9691807, sfEnds=9690928,9691191,9691892,	-	GO:0003676//nucleic acid binding	-
808329	105	19	23.29	6.35	-1.87488	Down	3.62e-09	6.38e-08	jgi|Poptr1_1|808329|fgenesh4_pm.C_LG_XVI000057|CDS chrom=LG_XVI strand=- start=1235259 end=1240621 cdsStart=1235259 cdsEnd=1240621 sfCount=22 sfStarts=1235259,1235678,1235791,1236091,1236247,1236466,1236931,1237121,1237380,1237631,1237871,1238137,1238334,1238534,1238730,1238945,1239222,1239394,1239564,1239779,1240074,1240361, sfEnds=1235434,1235709,1235885,1236164,1236358,1236529,1236996,1237254,…	-	-	-
821951	105	19	23.29	6.35	-1.87488	Down	3.62e-09	6.37e-08	jgi|Poptr1_1|821951|estExt_fgenesh4_pg.C_LG_X0744|CDS chrom=LG_X strand=- start=9090439 end=9097985 cdsStart=9090578 cdsEnd=9097985 sfCount=18 sfStarts=9090439,9091742,9091895,9092086,9092381,9092573,9092785,9092999,9093430,9093637,9094739,9095287,9095462,9096142,9096380,9096594,9097341,9097796, sfEnds=9090658,9091799,9091986,9092205,9092470,9092665,9092866,9093117,9093543,9093762,9094841,9095359…	-	-	-
801528	282	51	62.54	17.06	-1.87416	Down	2.1e-22	1.17e-20	jgi|Poptr1_1|801528|fgenesh4_pm.C_LG_V000620|CDS chrom=LG_V strand=- start=16259653 end=16266967 cdsStart=16259653 cdsEnd=16266967 sfCount=18 sfStarts=16259653,16259957,16261365,16261651,16261817,16262294,16262581,16262836,16263541,16263780,16264003,16265177,16265407,16265673,16266092,16266281,16266499,16266827, sfEnds=16259857,16260016,16261558,16261734,16262000,16262500,16262741,16262989,162636…	GO:0016020//membrane	GO:0003936;GO:0046933//hydrogen ion transporting ATP synthase activity, rotational mechanism;GO:0046961//proton-transporting ATPase activity, rotational mechanism	GO:0015992//proton transport
429219	55	10	12.2	3.34	-1.86896	Down	2.44e-05	0.000215743	jgi|Poptr1_1|429219|gw1.VI.2891.1|CDS chrom=LG_VI strand=- start=16925255 end=16930296 cdsStart=16925255 cdsEnd=16930296 sfCount=12 sfStarts=16930049,16929284,16929132,16928697,16928334,16928038,16927751,16927441,16926685,16926512,16925831,16925255, sfEnds=16930296,16929649,16929189,16929014,16928579,16928136,16927791,16927633,16926879,16926587,16926403,16925508,	-	-	-
763913	88	16	19.52	5.35	-1.86734	Down	7.54e-08	1.08e-06	jgi|Poptr1_1|763913|fgenesh4_pg.C_LG_VII000258|CDS chrom=LG_VII strand=+ start=1635437 end=1638079 cdsStart=1635437 cdsEnd=1638079 sfCount=5 sfStarts=1635437,1635922,1636755,1637322,1637814, sfEnds=1635577,1636654,1637232,1637518,1638079,	-	GO:0003779//actin binding	GO:0016043//cellular component organization
216941	1684	308	373.46	103.01	-1.85817	Down	1.63e-124	3.51e-122	jgi|Poptr1_1|216941|gw1.VII.1246.1|CDS chrom=LG_VII strand=- start=2030967 end=2032103 cdsStart=2030967 cdsEnd=2032103 sfCount=1 sfStarts=2030967, sfEnds=2032103,	-	-	-
773763	235	43	52.12	14.38	-1.85777	Down	1.06e-18	5.05e-17	jgi|Poptr1_1|773763|fgenesh4_pg.C_LG_XIII000217|CDS chrom=LG_XIII strand=+ start=3066237 end=3075697 cdsStart=3066237 cdsEnd=3075697 sfCount=33 sfStarts=3066237,3066522,3066787,3067047,3067272,3067510,3067737,3067932,3068071,3068352,3068583,3068797,3069127,3069444,3069705,3069996,3070271,3070575,3071311,3071667,3072180,3072479,3072827,3073183,3073498,3073777,3074310,3074465,3074640,3074814,307497…	GO:0016459//myosin complex	GO:0003774//motor activity;GO:0005524//ATP binding;GO:0004351//glutamate decarboxylase activity	-
834991	131	24	29.05	8.03	-1.85507	Down	5.28e-11	1.15e-09	jgi|Poptr1_1|834991|estExt_fgenesh4_pm.C_LG_XIV0503|CDS chrom=LG_XIV strand=- start=10034243 end=10040903 cdsStart=10034243 cdsEnd=10040903 sfCount=11 sfStarts=10034243,10034412,10035541,10036508,10036654,10036851,10037084,10037508,10037683,10038350,10040263, sfEnds=10034281,10034588,10035630,10036573,10036785,10037006,10037459,10037571,10038283,10038833,10040903,	GO:0016469//proton-transporting two-sector ATPase complex	GO:0005524//ATP binding;GO:0046933//hydrogen ion transporting ATP synthase activity, rotational mechanism;GO:0046961//proton-transporting ATPase activity, rotational mechanism;GO:0031072//heat shock protein binding;GO:0051082//unfolded protein binding;GO:0004675//transmembrane receptor protein serine/threonine kinase activity;GO:0004676//3-phosphoinositide-dependent protein kinase activity;GO:000…	GO:0015986//ATP synthesis coupled proton transport;GO:0006457//protein folding
819242	2109	387	467.71	129.43	-1.85344	Down	5.96e-155	1.44e-152	jgi|Poptr1_1|819242|estExt_fgenesh4_pg.C_LG_VI0896|CDS chrom=LG_VI strand=+ start=7756688 end=7759610 cdsStart=7756688 cdsEnd=7759321 sfCount=6 sfStarts=7756688,7757549,7757719,7757944,7758575,7759019, sfEnds=7757326,7757631,7757839,7758117,7758682,7759610,	GO:0005952//cAMP-dependent protein kinase complex;GO:0005956//protein kinase CK2 complex	GO:0004672//protein kinase activity;GO:0005524//ATP binding;GO:0004674//protein serine/threonine kinase activity;GO:0004713//protein tyrosine kinase activity;GO:0004682//protein kinase CK2 activity;GO:0004691//cAMP-dependent protein kinase activity;GO:0008603//cAMP-dependent protein kinase regulator activity;GO:0008605//protein kinase CK2 regulator activity	GO:0006468//protein amino acid phosphorylation
804951	49	9	10.87	3.01	-1.85252	Down	7.73e-05	0.000603665	jgi|Poptr1_1|804951|fgenesh4_pm.C_LG_X000257|CDS chrom=LG_X strand=+ start=7960297 end=7968901 cdsStart=7960297 cdsEnd=7968901 sfCount=25 sfStarts=7960297,7960566,7960842,7961094,7961337,7962591,7963314,7963473,7963601,7963720,7963909,7964073,7964534,7964782,7965418,7965904,7966105,7966906,7967122,7967603,7967788,7968023,7968282,7968520,7968758, sfEnds=7960448,7960752,7960940,7961258,7961679,7962…	-	-	-
262456	489	90	108.45	30.1	-1.84919	Down	4.17e-37	4.06e-35	jgi|Poptr1_1|262456|gw1.XVIII.2997.1|CDS chrom=LG_XVIII strand=- start=10118318 end=10123789 cdsStart=10118318 cdsEnd=10123789 sfCount=10 sfStarts=10123595,10123455,10123208,10122926,10122678,10122065,10121928,10120694,10119995,10118318, sfEnds=10123789,10123514,10123279,10123101,10122838,10122123,10121974,10120834,10120086,10118709,	GO:0000151//ubiquitin ligase complex	GO:0004842//ubiquitin-protein ligase activity;GO:0008270//zinc ion binding	GO:0016567//protein ubiquitination
1069049	103	19	22.84	6.35	-1.84673	Down	7.23e-09	1.23e-07	jgi|Poptr1_1|1069049|estExt_Genewise1Plus.C_LG_I6451|CDS chrom=LG_I strand=+ start=23172353 end=23178108 cdsStart=23172353 cdsEnd=23177641 sfCount=8 sfStarts=23172353,23173706,23174201,23174561,23175131,23176135,23176470,23177036, sfEnds=23172627,23173876,23174444,23174761,23175618,23176299,23176713,23178108,	-	-	-
668308	233	43	51.67	14.38	-1.84526	Down	2.11e-18	9.9e-17	jgi|Poptr1_1|668308|grail3.0209002401|CDS chrom=LG_XVII strand=+ start=262404 end=263624 cdsStart=262435 cdsEnd=263624 sfCount=3 sfStarts=262404,262940,263156, sfEnds=262732,263063,263624,	-	GO:0004437//inositol or phosphatidylinositol phosphatase activity	-
819928	558	103	123.75	34.45	-1.84485	Down	5.36e-42	5.82e-40	jgi|Poptr1_1|819928|estExt_fgenesh4_pg.C_LG_VII0796|CDS chrom=LG_VII strand=- start=7377166 end=7381283 cdsStart=7377228 cdsEnd=7381179 sfCount=3 sfStarts=7377166,7378324,7381014, sfEnds=7377695,7378598,7381283,	-	-	-
561401	54	10	11.98	3.34	-1.84271	Down	3.47e-05	0.000294566	jgi|Poptr1_1|561401|eugene3.00061360|CDS chrom=LG_VI strand=- start=12913406 end=12915645 cdsStart=12913406 cdsEnd=12915645 sfCount=2 sfStarts=12913406,12914644, sfEnds=12914509,12915645,	-	-	-
814076	162	30	35.93	10.03	-1.84087	Down	3.62e-13	1.06e-11	jgi|Poptr1_1|814076|estExt_fgenesh4_kg.C_LG_IX0009|CDS chrom=LG_IX strand=- start=2401737 end=2406864 cdsStart=2402352 cdsEnd=2406799 sfCount=8 sfStarts=2401737,2403419,2404036,2404543,2404971,2405742,2406562,2406712, sfEnds=2402549,2403511,2404110,2404617,2405077,2405833,2406625,2406864,	-	GO:0003824//catalytic activity	GO:0009116//nucleoside metabolic process
737826	162	30	35.93	10.03	-1.84087	Down	3.62e-13	1.06e-11	jgi|Poptr1_1|737826|estExt_Genewise1_v1.C_LG_XVIII2895|CDS chrom=LG_XVIII strand=+ start=9857254 end=9863781 cdsStart=9857902 cdsEnd=9863548 sfCount=21 sfStarts=9857254,9857887,9858171,9858368,9858516,9858746,9859028,9859818,9859984,9860153,9860380,9860648,9860774,9861682,9861845,9862048,9862221,9862410,9862610,9862759,9863513, sfEnds=9857312,9857961,9858278,9858442,9858645,9858837,9859078,985989…	-	-	-
590053	97	18	21.51	6.02	-1.83717	Down	2.23e-08	3.44e-07	jgi|Poptr1_1|590053|eugene3.00290236|CDS chrom=scaffold_29 strand=+ start=2541398 end=2548470 cdsStart=2541398 cdsEnd=2548470 sfCount=11 sfStarts=2541398,2542672,2544049,2544286,2545346,2545479,2545691,2546093,2546605,2547127,2548111, sfEnds=2541400,2543056,2544205,2544505,2545399,2545558,2545968,2546488,2547011,2547408,2548470,	-	-	-
765401	161	30	35.71	10.03	-1.83201	Down	5.1e-13	1.45e-11	jgi|Poptr1_1|765401|fgenesh4_pg.C_LG_VIII000415|CDS chrom=LG_VIII strand=+ start=2748354 end=2755879 cdsStart=2748354 cdsEnd=2755879 sfCount=11 sfStarts=2748354,2749922,2750083,2750353,2751310,2751646,2752057,2752364,2752869,2753780,2754650, sfEnds=2748737,2749976,2750258,2750553,2751569,2751956,2752277,2752704,2753644,2754021,2755879,	GO:0016021//integral to membrane	GO:0005524//ATP binding;GO:0042626//ATPase activity, coupled to transmembrane movement of substances;GO:0016887//ATPase activity;GO:0000166//nucleotide binding;GO:0017111//nucleoside-triphosphatase activity	GO:0006810//transport
570193	118	22	26.17	7.36	-1.83014	Down	7e-10	1.36e-08	jgi|Poptr1_1|570193|eugene3.00120846|CDS chrom=LG_XII strand=+ start=10946044 end=10950171 cdsStart=10946044 cdsEnd=10949859 sfCount=3 sfStarts=10946044,10947734,10948042, sfEnds=10946284,10947828,10950171,	-	-	-
787203	64	12	14.19	4.01	-1.8232	Down	7.05e-06	7.03e-05	jgi|Poptr1_1|787203|fgenesh4_pg.C_scaffold_201000014|CDS chrom=scaffold_201 strand=- start=146717 end=156090 cdsStart=146717 cdsEnd=156090 sfCount=34 sfStarts=146717,147141,147365,147544,147716,147853,148033,148354,148590,148878,149135,149493,149623,149891,150329,150806,151495,151714,152089,152499,152718,153026,153326,153583,153903,154128,154312,154510,154667,154912,155125,155375,155748,155938, s…	GO:0016459//myosin complex	GO:0003774//motor activity;GO:0005524//ATP binding;GO:0004351//glutamate decarboxylase activity	-
730970	48	9	10.64	3.01	-1.82166	Down	0.000109644	0.000823283	jgi|Poptr1_1|730970|estExt_Genewise1_v1.C_LG_XIV0993|CDS chrom=LG_XIV strand=+ start=1909462 end=1913258 cdsStart=1909786 cdsEnd=1913026 sfCount=9 sfStarts=1909462,1909631,1909765,1910274,1910445,1910716,1911909,1912132,1912919, sfEnds=1909479,1909686,1909863,1910333,1910639,1910835,1912052,1912188,1913258,	-	-	-
665630	48	9	10.64	3.01	-1.82166	Down	0.000109644	0.00082277	jgi|Poptr1_1|665630|grail3.0095006401|CDS chrom=LG_XIX strand=+ start=7665878 end=7674596 cdsStart=7666050 cdsEnd=7674523 sfCount=6 sfStarts=7665878,7666050,7672131,7672403,7673269,7674357, sfEnds=7665942,7666224,7672311,7672544,7673338,7674596,	GO:0005783//endoplasmic reticulum	GO:0005554	-
816803	218	41	48.35	13.71	-1.81829	Down	5.38e-17	2.29e-15	jgi|Poptr1_1|816803|estExt_fgenesh4_pg.C_LG_II2062|CDS chrom=LG_II strand=+ start=19560688 end=19568920 cdsStart=19560688 cdsEnd=19568398 sfCount=20 sfStarts=19560688,19560935,19561156,19561398,19561711,19562110,19562795,19563033,19563263,19563441,19563669,19564645,19565021,19565199,19565412,19566201,19566396,19567267,19567489,19568330, sfEnds=19560691,19561039,19561316,19561490,19561896,19562271…	-	GO:0016836//hydro-lyase activity;GO:0016829//lyase activity;GO:0003723//RNA binding;GO:0003994//aconitate hydratase activity;GO:0005506//iron ion binding	GO:0008152//metabolic process
798081	69	13	15.3	4.35	-1.81444	Down	3.19e-06	3.46e-05	jgi|Poptr1_1|798081|fgenesh4_pm.C_LG_I001084|CDS chrom=LG_I strand=- start=27314970 end=27317723 cdsStart=27314970 cdsEnd=27317723 sfCount=5 sfStarts=27314970,27315929,27316776,27317184,27317574, sfEnds=27315359,27316012,27316860,27317392,27317723,	-	-	-
578136	159	30	35.26	10.03	-1.81371	Down	1.01e-12	2.71e-11	jgi|Poptr1_1|578136|eugene3.00180360|CDS chrom=LG_XVIII strand=+ start=4917432 end=4920025 cdsStart=4917432 cdsEnd=4919878 sfCount=3 sfStarts=4917432,4918520,4919499, sfEnds=4917767,4918775,4920025,	-	-	-
730530	111	21	24.62	7.02	-1.81029	Down	3.02e-09	5.37e-08	jgi|Poptr1_1|730530|estExt_Genewise1_v1.C_LG_XIII3472|CDS chrom=LG_XIII strand=+ start=11859218 end=11869948 cdsStart=11860861 cdsEnd=11869948 sfCount=23 sfStarts=11859218,11859445,11860009,11860270,11860585,11860827,11861181,11861599,11862179,11862469,11862666,11863245,11864058,11864541,11865392,11865621,11866277,11866733,11867575,11868020,11868674,11869470,11869814, sfEnds=11859365,11859657,118…	-	-	-
736729	132	25	29.27	8.36	-1.80785	Down	9.57e-11	2.03e-09	jgi|Poptr1_1|736729|estExt_Genewise1_v1.C_LG_XVIII0587|CDS chrom=LG_XVIII strand=+ start=517033 end=525060 cdsStart=517033 cdsEnd=525060 sfCount=14 sfStarts=517033,517445,517734,518906,519280,520427,520692,521034,521265,521971,523229,523678,524237,524895, sfEnds=517065,517649,517899,519128,519356,520614,520789,521167,521393,522334,523350,523791,524428,525060,	-	-	-
1103181	95	18	21.07	6.02	-1.80735	Down	4.43e-08	6.49e-07	jgi|Poptr1_1|1103181|estExt_Genewise1Plus.C_LG_XVI1110|CDS chrom=LG_XVI strand=- start=3364914 end=3369112 cdsStart=3365268 cdsEnd=3369112 sfCount=11 sfStarts=3364914,3365618,3365939,3366392,3366828,3367150,3367777,3368093,3368302,3368776,3369035, sfEnds=3365510,3365704,3366031,3366517,3366986,3367227,3367836,3368166,3368341,3368898,3369112,	-	-	-
217549	200	38	44.35	12.71	-1.80297	Down	1.5e-15	5.55e-14	jgi|Poptr1_1|217549|gw1.VII.1854.1|CDS chrom=LG_VII strand=+ start=3971191 end=3973394 cdsStart=3971191 cdsEnd=3973394 sfCount=5 sfStarts=3971191,3971587,3971864,3972835,3973290, sfEnds=3971471,3971782,3972036,3973168,3973394,	-	-	-
282103	568	108	125.97	36.12	-1.80221	Down	1.89e-41	2.02e-39	jgi|Poptr1_1|282103|gw1.28.677.1|CDS chrom=scaffold_28 strand=- start=2091845 end=2098653 cdsStart=2091845 cdsEnd=2098653 sfCount=13 sfStarts=2098541,2098377,2097620,2097456,2097207,2097023,2096404,2095184,2094324,2093271,2092595,2092086,2091845, sfEnds=2098653,2098453,2097898,2097519,2097353,2097057,2096477,2096097,2094620,2093741,2092743,2092375,2091979,	-	GO:0005524//ATP binding;GO:0016887//ATPase activity;GO:0000166//nucleotide binding;GO:0017111//nucleoside-triphosphatase activity;GO:0031177//phosphopantetheine binding	-
765655	84	16	18.63	5.35	-1.80002	Down	2.99e-07	3.94e-06	jgi|Poptr1_1|765655|fgenesh4_pg.C_LG_VIII000669|CDS chrom=LG_VIII strand=- start=4757738 end=4765421 cdsStart=4757738 cdsEnd=4765421 sfCount=14 sfStarts=4757738,4757888,4758843,4759143,4760040,4760454,4760826,4761925,4762209,4762715,4762980,4764087,4765046,4765245, sfEnds=4757788,4757936,4758922,4759276,4760147,4760523,4760903,4762047,4762268,4762759,4763057,4764143,4765162,4765421,	GO:0000139//Golgi membrane;GO:0016021//integral to membrane	GO:0005351//sugar:hydrogen symporter activity	GO:0008643//carbohydrate transport
557709	4348	830	964.26	277.59	-1.79647	Down	1.8e-304	5.29e-302	jgi|Poptr1_1|557709|eugene3.00090969|CDS chrom=LG_IX strand=- start=6158258 end=6161862 cdsStart=6158258 cdsEnd=6161862 sfCount=5 sfStarts=6158258,6160015,6160502,6160888,6161167, sfEnds=6158445,6160089,6160680,6160967,6161862,	-	-	-
250497	351	67	77.84	22.41	-1.79637	Down	4.26e-26	2.79e-24	jgi|Poptr1_1|250497|gw1.XIX.2897.1|CDS chrom=LG_XIX strand=- start=11739822 end=11741406 cdsStart=11739822 cdsEnd=11741406 sfCount=3 sfStarts=11740827,11740567,11739822, sfEnds=11741406,11740713,11740438,	-	-	-
726156	89	17	19.74	5.69	-1.79462	Down	1.36e-07	1.89e-06	jgi|Poptr1_1|726156|estExt_Genewise1_v1.C_LG_X5003|CDS chrom=LG_X strand=+ start=6415346 end=6417814 cdsStart=6415481 cdsEnd=6417613 sfCount=4 sfStarts=6415346,6416928,6417168,6417511, sfEnds=6415834,6417087,6417249,6417814,	-	-	-
718612	392	75	86.93	25.08	-1.79332	Down	6.69e-29	4.86e-27	jgi|Poptr1_1|718612|estExt_Genewise1_v1.C_LG_VII1503|CDS chrom=LG_VII strand=+ start=2957583 end=2962428 cdsStart=2957583 cdsEnd=2962060 sfCount=9 sfStarts=2957583,2957929,2958808,2959823,2960311,2960508,2960987,2961524,2961832, sfEnds=2957856,2958725,2958957,2960093,2960421,2960682,2961259,2961718,2962428,	-	GO:0008168//methyltransferase activity;GO:0005554	-
571264	73	14	16.19	4.68	-1.79052	Down	2.04e-06	2.31e-05	jgi|Poptr1_1|571264|eugene3.00130628|CDS chrom=LG_XIII strand=+ start=4883264 end=4891465 cdsStart=4883710 cdsEnd=4891211 sfCount=15 sfStarts=4883264,4884370,4884951,4885869,4886133,4886338,4886570,4886857,4888122,4889112,4889734,4889975,4890783,4891055,4891419, sfEnds=4883863,4884571,4885035,4886009,4886251,4886434,4886742,4886923,4888280,4889382,4889842,4890087,4890858,4891347,4891465,	GO:0005622//intracellular;GO:0005840//ribosome;GO:0016020//membrane	GO:0003735//structural constituent of ribosome;GO:0005279	GO:0006412//translation;GO:0006865//amino acid transport;GO:0006810//transport
706432	219	42	48.57	14.05	-1.7895	Down	9.62e-17	4.08e-15	jgi|Poptr1_1|706432|estExt_Genewise1_v1.C_LG_I1843|CDS chrom=LG_I strand=+ start=19487725 end=19495069 cdsStart=19488059 cdsEnd=19493573 sfCount=9 sfStarts=19487725,19488505,19488696,19488951,19489824,19493331,19493537,19493782,19494598, sfEnds=19488069,19488592,19488830,19489483,19489893,19493419,19493600,19493864,19495069,	GO:0000151//ubiquitin ligase complex	GO:0003676//nucleic acid binding;GO:0004842//ubiquitin-protein ligase activity;GO:0008270//zinc ion binding	GO:0016567//protein ubiquitination
736537	83	16	18.41	5.35	-1.78288	Down	4.21e-07	5.45e-06	jgi|Poptr1_1|736537|estExt_Genewise1_v1.C_LG_XVIII0139|CDS chrom=LG_XVIII strand=+ start=12366243 end=12375320 cdsStart=12366243 cdsEnd=12374897 sfCount=26 sfStarts=12366243,12366456,12366896,12367105,12367369,12367641,12368279,12368852,12369148,12369364,12369539,12369784,12369956,12370520,12370760,12371358,12371650,12371867,12372552,12372810,12373373,12373590,12373974,12374397,12374696,12375178,…	-	-	-
833036	57	11	12.64	3.68	-1.78022	Down	3.11e-05	0.000266172	jgi|Poptr1_1|833036|estExt_fgenesh4_pm.C_LG_IX0216|CDS chrom=LG_IX strand=+ start=2666035 end=2669546 cdsStart=2666169 cdsEnd=2669546 sfCount=10 sfStarts=2666035,2667144,2667346,2667516,2668086,2668491,2668806,2668967,2669237,2669430, sfEnds=2666228,2667266,2667415,2667667,2668187,2668691,2668868,2669119,2669311,2669546,	-	-	-
720159	409	79	90.7	26.42	-1.77947	Down	8.55e-30	6.36e-28	jgi|Poptr1_1|720159|estExt_Genewise1_v1.C_LG_VIII0741|CDS chrom=LG_VIII strand=- start=8241134 end=8242375 cdsStart=8241398 cdsEnd=8242192 sfCount=1 sfStarts=8241134, sfEnds=8242375,	-	GO:0004751//ribose-5-phosphate isomerase activity	-
551649	62	12	13.75	4.01	-1.77776	Down	1.4e-05	0.000129788	jgi|Poptr1_1|551649|eugene3.00020964|CDS chrom=LG_II strand=+ start=7555089 end=7562186 cdsStart=7555532 cdsEnd=7561901 sfCount=11 sfStarts=7555089,7556861,7558389,7558720,7558911,7559181,7559462,7560006,7560178,7561048,7561199, sfEnds=7555704,7558295,7558477,7558805,7559073,7559301,7559619,7560090,7560390,7561109,7562186,	-	GO:0004197//cysteine-type endopeptidase activity;GO:0004221//ubiquitin thiolesterase activity;GO:0031177//phosphopantetheine binding	GO:0006511//ubiquitin-dependent protein catabolic process
803486	103	20	22.84	6.69	-1.77148	Down	1.82e-08	2.9e-07	jgi|Poptr1_1|803486|fgenesh4_pm.C_LG_VIII000441|CDS chrom=LG_VIII strand=+ start=6647645 end=6651420 cdsStart=6647645 cdsEnd=6651420 sfCount=4 sfStarts=6647645,6650542,6651022,6651349, sfEnds=6649811,6650545,6651025,6651420,	-	GO:0004672//protein kinase activity;GO:0005524//ATP binding;GO:0004713//protein tyrosine kinase activity;GO:0004674//protein serine/threonine kinase activity	GO:0006468//protein amino acid phosphorylation
173157	175	34	38.81	11.37	-1.7712	Down	1.76e-13	5.4e-12	jgi|Poptr1_1|173157|gw1.I.1757.1|CDS chrom=LG_I strand=+ start=19174312 end=19177479 cdsStart=19174312 cdsEnd=19177479 sfCount=4 sfStarts=19174312,19174536,19176038,19176873, sfEnds=19174407,19175539,19176621,19177479,	-	-	-
705784	77	15	17.08	5.02	-1.76655	Down	1.3e-06	1.54e-05	jgi|Poptr1_1|705784|estExt_Genewise1_v1.C_LG_I0319|CDS chrom=LG_I strand=+ start=13724318 end=13728852 cdsStart=13724487 cdsEnd=13728430 sfCount=6 sfStarts=13724318,13724795,13725839,13726654,13728389,13728816, sfEnds=13724693,13725538,13725997,13727613,13728786,13728852,	-	-	-
425549	164	32	36.37	10.7	-1.76514	Down	1.16e-12	3.07e-11	jgi|Poptr1_1|425549|gw1.III.1951.1|CDS chrom=LG_III strand=- start=13362454 end=13365161 cdsStart=13362454 cdsEnd=13365161 sfCount=7 sfStarts=13365011,13364434,13364175,13363584,13362971,13362655,13362454, sfEnds=13365161,13364578,13364343,13363854,13363236,13362870,13362564,	-	-	-
836130	97	19	21.51	6.35	-1.76018	Down	5.59e-08	8.1e-07	jgi|Poptr1_1|836130|estExt_fgenesh4_pm.C_LG_XIX0249|CDS chrom=LG_XIX strand=- start=10015364 end=10017998 cdsStart=10015516 cdsEnd=10017998 sfCount=5 sfStarts=10015364,10016158,10016405,10017397,10017757, sfEnds=10015679,10016284,10016495,10017702,10017998,	GO:0005634//nucleus	GO:0003677//DNA binding	GO:0006355//regulation of transcription, DNA-dependent
885676	51	10	11.31	3.34	-1.75968	Down	9.77e-05	0.000742058	jgi|Poptr1_1|885676|e_gw1.X.2117.1|CDS chrom=LG_X strand=+ start=17706948 end=17708282 cdsStart=17706948 cdsEnd=17708282 sfCount=1 sfStarts=17706948, sfEnds=17708282,	-	-	-
1108775	51	10	11.31	3.34	-1.75968	Down	9.77e-05	0.000741591	jgi|Poptr1_1|1108775|estExt_Genewise1Plus.C_LG_XIX2843|CDS chrom=LG_XIX strand=+ start=11730562 end=11732977 cdsStart=11730562 cdsEnd=11732977 sfCount=4 sfStarts=11730562,11730739,11732079,11732355, sfEnds=11730612,11731960,11732225,11732977,	-	-	-
735172	260	51	57.66	17.06	-1.75695	Down	3.6e-19	1.76e-17	jgi|Poptr1_1|735172|estExt_Genewise1_v1.C_LG_XVI2043|CDS chrom=LG_XVI strand=+ start=4466199 end=4469818 cdsStart=4466805 cdsEnd=4469518 sfCount=5 sfStarts=4466199,4466485,4466635,4468880,4469395, sfEnds=4466351,4466489,4468241,4468926,4469818,	-	-	-
831453	56	11	12.42	3.68	-1.75489	Down	4.38e-05	0.000364545	jgi|Poptr1_1|831453|estExt_fgenesh4_pm.C_LG_V0264|CDS chrom=LG_V strand=+ start=6967524 end=6970587 cdsStart=6967761 cdsEnd=6970233 sfCount=4 sfStarts=6967524,6967751,6967981,6970093, sfEnds=6967674,6967889,6968031,6970587,	GO:0005672//transcription factor TFIIA complex	GO:0003702//RNA polymerase II transcription factor activity	GO:0006367//transcription initiation from RNA polymerase II promoter
584014	56	11	12.42	3.68	-1.75489	Down	4.38e-05	0.000364293	jgi|Poptr1_1|584014|eugene3.01570008|CDS chrom=scaffold_157 strand=- start=76673 end=79960 cdsStart=76889 cdsEnd=79960 sfCount=7 sfStarts=76673,77515,78479,78875,79104,79346,79820, sfEnds=77419,77654,78782,78985,79202,79456,79960,	-	GO:0005524//ATP binding;GO:0000166//nucleotide binding;GO:0017111//nucleoside-triphosphatase activity	-
563814	168	33	37.26	11.04	-1.75489	Down	7.44e-13	2.07e-11	jgi|Poptr1_1|563814|eugene3.00080409|CDS chrom=LG_VIII strand=- start=2519509 end=2523664 cdsStart=2519598 cdsEnd=2522475 sfCount=6 sfStarts=2519509,2519976,2520543,2522151,2523175,2523410, sfEnds=2519828,2520212,2520910,2522578,2523238,2523664,	GO:0008287//protein serine/threonine phosphatase complex;GO:0016020//membrane;GO:0005963;GO:0017023//myosin phosphatase complex	GO:0004722//protein serine/threonine phosphatase activity;GO:0003824//catalytic activity;GO:0005215//transporter activity;GO:0000158;GO:0004721//phosphoprotein phosphatase activity;GO:0004723//calcium-dependent protein serine/threonine phosphatase activity;GO:0004724//magnesium-dependent protein serine/threonine phosphatase activity;GO:0008420//CTD phosphatase activity;GO:0008597//calcium-depende…	GO:0006470//protein amino acid dephosphorylation;GO:0006810//transport
260956	173	34	38.37	11.37	-1.75475	Down	3.43e-13	1.01e-11	jgi|Poptr1_1|260956|gw1.XVIII.1497.1|CDS chrom=LG_XVIII strand=- start=5292324 end=5297393 cdsStart=5292324 cdsEnd=5297393 sfCount=12 sfStarts=5297275,5296389,5296238,5295817,5295414,5295108,5294831,5294525,5293780,5293606,5292905,5292324, sfEnds=5297393,5296754,5296295,5296134,5295659,5295206,5294872,5294710,5293974,5293681,5293507,5292586,	GO:0016020//membrane	GO:0005267//potassium channel activity;GO:0005249//voltage-gated potassium channel activity;GO:0005261//cation channel activity;GO:0005216//ion channel activity	GO:0006813//potassium ion transport;GO:0006812//cation transport;GO:0006811//ion transport
578742	188	37	41.69	12.37	-1.75286	Down	3.38e-14	1.14e-12	jgi|Poptr1_1|578742|eugene3.00180966|CDS chrom=LG_XVIII strand=- start=10743279 end=10746727 cdsStart=10743279 cdsEnd=10746727 sfCount=7 sfStarts=10743279,10744546,10744815,10745015,10745211,10745414,10746599, sfEnds=10744436,10744699,10744927,10745123,10745320,10745578,10746727,	GO:0016021//integral to membrane	GO:0005215//transporter activity	GO:0006810//transport
217167	187	37	41.47	12.37	-1.74522	Down	4.71e-14	1.56e-12	jgi|Poptr1_1|217167|gw1.VII.1472.1|CDS chrom=LG_VII strand=- start=2852898 end=2856324 cdsStart=2852898 cdsEnd=2856324 sfCount=3 sfStarts=2856154,2854280,2852898, sfEnds=2856324,2855275,2854037,	-	-	-
757127	515	102	114.21	34.11	-1.74342	Down	3.88e-36	3.68e-34	jgi|Poptr1_1|757127|fgenesh4_pg.C_LG_III000669|CDS chrom=LG_III strand=- start=8539980 end=8545439 cdsStart=8539980 cdsEnd=8545439 sfCount=7 sfStarts=8539980,8541193,8541600,8542396,8542660,8544709,8545266, sfEnds=8540219,8541479,8541771,8542554,8544611,8544763,8545439,	GO:0016020//membrane	GO:0005524//ATP binding;GO:0015662//ATPase activity, coupled to transmembrane movement of ions, phosphorylative mechanism;GO:0003824//catalytic activity;GO:0005388//calcium-transporting ATPase activity;GO:0005509//calcium ion binding;GO:0015085//calcium ion transmembrane transporter activity;GO:0016820//hydrolase activity, acting on acid anhydrides, catalyzing transmembrane movement of substances	GO:0015992//proton transport;GO:0006812//cation transport;GO:0008152//metabolic process;GO:0006816//calcium ion transport
648231	101	20	22.4	6.69	-1.74342	Down	3.57e-08	5.32e-07	jgi|Poptr1_1|648231|grail3.0038018602|CDS chrom=LG_IV strand=- start=7780136 end=7784367 cdsStart=7780153 cdsEnd=7784250 sfCount=7 sfStarts=7780136,7780768,7781968,7782236,7782472,7783134,7784099, sfEnds=7780372,7781252,7782124,7782373,7783057,7783174,7784367,	GO:0016021//integral to membrane	GO:0005215//transporter activity	GO:0006810//transport
865582	196	39	43.47	13.04	-1.73708	Down	1.4e-14	4.86e-13	jgi|Poptr1_1|865582|e_gw1.VI.466.1|CDS chrom=LG_VI strand=- start=14690250 end=14697695 cdsStart=14690250 cdsEnd=14697695 sfCount=17 sfStarts=14690250,14690487,14691119,14691485,14692297,14692572,14692839,14693871,14694135,14694369,14694550,14694744,14695091,14695371,14696396,14696620,14697433, sfEnds=14690330,14690573,14691182,14691744,14692495,14692732,14692991,14694041,14694234,14694457,146946…	-	-	-
817045	50	10	11.09	3.34	-1.73134	Down	0.00013715	0.000998726	jgi|Poptr1_1|817045|estExt_fgenesh4_pg.C_LG_III0255|CDS chrom=LG_III strand=+ start=3478879 end=3484282 cdsStart=3478879 cdsEnd=3483840 sfCount=8 sfStarts=3478879,3480213,3480571,3481623,3481894,3482502,3483010,3483257, sfEnds=3479190,3480410,3480843,3481725,3482012,3482678,3483202,3484282,	-	GO:0004806//triacylglycerol lipase activity;GO:0003824//catalytic activity	GO:0006629//lipid metabolic process
231035	50	10	11.09	3.34	-1.73134	Down	0.00013715	0.000998123	jgi|Poptr1_1|231035|gw1.X.5732.1|CDS chrom=LG_X strand=- start=9052557 end=9062124 cdsStart=9052557 cdsEnd=9062124 sfCount=11 sfStarts=9061724,9060013,9059031,9058143,9057602,9057327,9055119,9054789,9053897,9052981,9052557, sfEnds=9062124,9060277,9059187,9058908,9058031,9057508,9055278,9055016,9054247,9053082,9052769,	-	GO:0004672//protein kinase activity;GO:0005524//ATP binding;GO:0004713//protein tyrosine kinase activity;GO:0004674//protein serine/threonine kinase activity	GO:0006468//protein amino acid phosphorylation
933610	95	19	21.07	6.35	-1.73036	Down	1.09e-07	1.53e-06	jgi|Poptr1_1|933610|e_gw1.199.10.1|CDS chrom=scaffold_199 strand=- start=115275 end=117434 cdsStart=115275 cdsEnd=117434 sfCount=2 sfStarts=115275,115916, sfEnds=115870,117434,	-	-	-
1105818	70	14	15.52	4.68	-1.72955	Down	5.62e-06	5.77e-05	jgi|Poptr1_1|1105818|estExt_Genewise1Plus.C_LG_XVIII0745|CDS chrom=LG_XVIII strand=- start=4511859 end=4517419 cdsStart=4512079 cdsEnd=4517419 sfCount=10 sfStarts=4511859,4512853,4513959,4514857,4515376,4515628,4515988,4516196,4516855,4517319, sfEnds=4512689,4513343,4514159,4514942,4515457,4515788,4516101,4516294,4516933,4517419,	-	-	-
584639	55	11	12.2	3.68	-1.7291	Down	6.14e-05	0.000491399	jgi|Poptr1_1|584639|eugene3.01650024|CDS chrom=scaffold_165 strand=- start=280688 end=283573 cdsStart=280688 cdsEnd=282022 sfCount=3 sfStarts=280688,283434, sfEnds=282398,283573,	-	GO:0003743//translation initiation factor activity	GO:0006413//translational initiation;GO:0006446//regulation of translational initiation
242488	65	13	14.42	4.35	-1.72898	Down	1.24e-05	0.000117271	jgi|Poptr1_1|242488|gw1.XIII.2737.1|CDS chrom=LG_XIII strand=- start=7460494 end=7465866 cdsStart=7460494 cdsEnd=7465866 sfCount=7 sfStarts=7465747,7464229,7463647,7462849,7462560,7462008,7460494, sfEnds=7465866,7464331,7464192,7463560,7462756,7462243,7461348,	-	GO:0003779//actin binding	GO:0016043//cellular component organization
819083	65	13	14.42	4.35	-1.72898	Down	1.24e-05	0.000117179	jgi|Poptr1_1|819083|estExt_fgenesh4_pg.C_LG_VI0484|CDS chrom=LG_VI strand=+ start=4207165 end=4216276 cdsStart=4207165 cdsEnd=4215746 sfCount=25 sfStarts=4207165,4207388,4207829,4208040,4208292,4208560,4209138,4209587,4209879,4210078,4210256,4210497,4210662,4211238,4211482,4212060,4212355,4212574,4213272,4213538,4214125,4214342,4214839,4215262,4215545, sfEnds=4207244,4207567,4207942,4208198,42084…	-	-	-
728642	75	15	16.63	5.02	-1.72803	Down	2.55e-06	2.8e-05	jgi|Poptr1_1|728642|estExt_Genewise1_v1.C_LG_XII0485|CDS chrom=LG_XII strand=+ start=13590735 end=13599163 cdsStart=13590809 cdsEnd=13598900 sfCount=21 sfStarts=13590735,13592943,13593445,13593665,13593856,13594120,13594353,13594816,13595003,13595180,13595345,13595546,13595854,13596074,13596996,13597393,13597689,13598026,13598164,13598859,13599148, sfEnds=13591028,13592986,13593512,13593740,13593…	-	-	-
823477	348	70	77.18	23.41	-1.7211	Down	1.67e-24	1.02e-22	jgi|Poptr1_1|823477|estExt_fgenesh4_pg.C_LG_XII1125|CDS chrom=LG_XII strand=- start=12838598 end=12840936 cdsStart=12838736 cdsEnd=12840936 sfCount=5 sfStarts=12838598,12838928,12839987,12840535,12840873, sfEnds=12838812,12839887,12840403,12840747,12840936,	-	-	-
768441	491	99	108.89	33.11	-1.71753	Down	7.34e-34	6.37e-32	jgi|Poptr1_1|768441|fgenesh4_pg.C_LG_IX001492|CDS chrom=LG_IX strand=+ start=11631698 end=11633377 cdsStart=11631698 cdsEnd=11633377 sfCount=1 sfStarts=11631698, sfEnds=11633377,	-	-	-
572889	104	21	23.06	7.02	-1.71585	Down	3.17e-08	4.76e-07	jgi|Poptr1_1|572889|eugene3.00140934|CDS chrom=LG_XIV strand=+ start=7267056 end=7274491 cdsStart=7267056 cdsEnd=7274491 sfCount=10 sfStarts=7267056,7267377,7267626,7269525,7270280,7270552,7271416,7273238,7273549,7274340, sfEnds=7267282,7267506,7267873,7269752,7270442,7270625,7271503,7273313,7273620,7274491,	-	GO:0004194;GO:0004675//transmembrane receptor protein serine/threonine kinase activity;GO:0004676//3-phosphoinositide-dependent protein kinase activity;GO:0004677//DNA-dependent protein kinase activity;GO:0004679//AMP-activated protein kinase activity;GO:0004680//casein kinase activity;GO:0004681//casein kinase I activity;GO:0004683//calmodulin-dependent protein kinase activity;GO:0004686//elonga…	GO:0006508//proteolysis
826658	94	19	20.85	6.35	-1.71522	Down	1.52e-07	2.09e-06	jgi|Poptr1_1|826658|estExt_fgenesh4_pg.C_290313|CDS chrom=scaffold_29 strand=- start=3034845 end=3038831 cdsStart=3035544 cdsEnd=3038831 sfCount=8 sfStarts=3034845,3035100,3036422,3036631,3037623,3037998,3038319,3038562, sfEnds=3034865,3035763,3036499,3037306,3037833,3038193,3038467,3038831,	-	GO:0005554	-
754337	188	38	41.69	12.71	-1.71374	Down	8.14e-14	2.65e-12	jgi|Poptr1_1|754337|fgenesh4_pg.C_LG_II000517|CDS chrom=LG_II strand=+ start=3671449 end=3675852 cdsStart=3671449 cdsEnd=3675852 sfCount=6 sfStarts=3671449,3672868,3673223,3674597,3675533,3675602, sfEnds=3671622,3673120,3674433,3674728,3675572,3675852,	-	-	-
721294	69	14	15.3	4.68	-1.70895	Down	7.85e-06	7.77e-05	jgi|Poptr1_1|721294|estExt_Genewise1_v1.C_LG_IX0257|CDS chrom=LG_IX strand=- start=329452 end=333795 cdsStart=329691 cdsEnd=332618 sfCount=10 sfStarts=329452,329519,329670,329891,330072,330829,330983,332059,332559,333689, sfEnds=329484,329649,329807,329956,330188,330900,331262,332279,332636,333795,	-	GO:0008121//ubiquinol-cytochrome-c reductase activity	-
265874	74	15	16.41	5.02	-1.70882	Down	3.55e-06	3.83e-05	jgi|Poptr1_1|265874|gw1.122.293.1|CDS chrom=scaffold_122 strand=- start=931957 end=934782 cdsStart=931957 cdsEnd=934782 sfCount=1 sfStarts=931957, sfEnds=934782,	GO:0005634//nucleus;GO:0000151//ubiquitin ligase complex	GO:0003700//transcription factor activity;GO:0004842//ubiquitin-protein ligase activity;GO:0008270//zinc ion binding;GO:0003677//DNA binding;GO:0008766//UDP-N-acetylmuramoylalanyl-D-glutamyl-2,6-diaminopimelate-D-alanyl-D-alanine ligase activity;GO:0016881//acid-amino acid ligase activity;GO:0018169//ribosomal S6-glutamic acid ligase activity	GO:0006355//regulation of transcription, DNA-dependent;GO:0016567//protein ubiquitination
832027	74	15	16.41	5.02	-1.70882	Down	3.55e-06	3.83e-05	jgi|Poptr1_1|832027|estExt_fgenesh4_pm.C_LG_VI0544|CDS chrom=LG_VI strand=+ start=12321831 end=12327608 cdsStart=12321831 cdsEnd=12327608 sfCount=5 sfStarts=12321831,12323892,12325985,12326603,12327192, sfEnds=12322774,12325566,12326205,12326819,12327608,	-	-	-
179958	128	26	28.39	8.7	-1.7063	Down	8.91e-10	1.69e-08	jgi|Poptr1_1|179958|gw1.I.8558.1|CDS chrom=LG_I strand=- start=6533224 end=6534914 cdsStart=6533224 cdsEnd=6534914 sfCount=2 sfStarts=6533877,6533224, sfEnds=6534914,6533436,	-	-	-
551073	64	13	14.19	4.35	-1.70579	Down	1.74e-05	0.000156996	jgi|Poptr1_1|551073|eugene3.00020388|CDS chrom=LG_II strand=- start=2713768 end=2716212 cdsStart=2713768 cdsEnd=2716212 sfCount=3 sfStarts=2713768,2715090,2716163, sfEnds=2714990,2715967,2716212,	-	-	-
816957	64	13	14.19	4.35	-1.70579	Down	1.74e-05	0.000156878	jgi|Poptr1_1|816957|estExt_fgenesh4_pg.C_LG_II2510|CDS chrom=LG_II strand=- start=23391962 end=23403062 cdsStart=23392268 cdsEnd=23403062 sfCount=22 sfStarts=23391962,23392682,23392957,23393151,23393296,23393471,23394673,23394914,23395084,23396905,23397352,23398913,23399128,23399292,23399447,23399664,23400016,23400999,23401393,23401566,23401729,23402730, sfEnds=23392429,23392783,23393025,23393219…	-	-	-
858427	59	12	13.08	4.01	-1.70569	Down	3.86e-05	0.000324921	jgi|Poptr1_1|858427|e_gw1.IV.2524.1|CDS chrom=LG_IV strand=- start=2989033 end=2999166 cdsStart=2989033 cdsEnd=2999166 sfCount=17 sfStarts=2989033,2990687,2990888,2991224,2991397,2991592,2992168,2993208,2994040,2994865,2995561,2996083,2996520,2996789,2998041,2998573,2998863, sfEnds=2989413,2990785,2991018,2991311,2991519,2991768,2992282,2993395,2994140,2994913,2995649,2996233,2996621,2996903,2998…	-	-	-
565644	54	11	11.98	3.68	-1.70285	Down	8.59e-05	0.000663789	jgi|Poptr1_1|565644|eugene3.00100202|CDS chrom=LG_X strand=+ start=3055715 end=3057595 cdsStart=3055715 cdsEnd=3057595 sfCount=1 sfStarts=3055715, sfEnds=3057595,	-	-	-
568285	54	11	11.98	3.68	-1.70285	Down	8.59e-05	0.000663364	jgi|Poptr1_1|568285|eugene3.00110299|CDS chrom=LG_XI strand=- start=3035278 end=3043970 cdsStart=3035278 cdsEnd=3043970 sfCount=19 sfStarts=3035278,3036135,3036721,3037543,3037937,3038746,3039323,3039783,3040187,3040998,3041534,3041749,3041981,3042196,3042636,3042838,3043219,3043565,3043776, sfEnds=3035388,3036462,3036932,3037653,3038044,3038855,3039417,3039982,3040351,3041116,3041621,3041854,304…	GO:0009341//beta-galactosidase complex	GO:0005529//sugar binding;GO:0004565//beta-galactosidase activity	GO:0005975//carbohydrate metabolic process
803156	162	33	35.93	11.04	-1.70245	Down	5.4e-12	1.29e-10	jgi|Poptr1_1|803156|fgenesh4_pm.C_LG_VIII000111|CDS chrom=LG_VIII strand=+ start=1807088 end=1812563 cdsStart=1807088 cdsEnd=1812563 sfCount=10 sfStarts=1807088,1808331,1808525,1809297,1809952,1810201,1810728,1811025,1811800,1812372, sfEnds=1807741,1808476,1809192,1809867,1810093,1810308,1810940,1811135,1811994,1812563,	-	GO:0003723//RNA binding	GO:0016071//mRNA metabolic process
554061	216	44	47.9	14.72	-1.70225	Down	1.53e-15	5.65e-14	jgi|Poptr1_1|554061|eugene3.00030694|CDS chrom=LG_III strand=+ start=9622636 end=9633215 cdsStart=9628194 cdsEnd=9632964 sfCount=8 sfStarts=9622636,9623515,9628078,9630159,9630884,9631700,9631978,9632902, sfEnds=9622856,9623636,9629296,9630400,9631041,9631885,9632073,9633215,	-	-	-
427193	441	90	97.8	30.1	-1.70007	Down	3.65e-30	2.77e-28	jgi|Poptr1_1|427193|gw1.VI.865.1|CDS chrom=LG_VI strand=- start=6471308 end=6474406 cdsStart=6471308 cdsEnd=6474406 sfCount=8 sfStarts=6473990,6473077,6472920,6472732,6472510,6472181,6471595,6471308, sfEnds=6474406,6473155,6472984,6472820,6472642,6472413,6472074,6471491,	-	-	-
652880	88	18	19.52	6.02	-1.69712	Down	4.64e-07	5.97e-06	jgi|Poptr1_1|652880|grail3.0023009602|CDS chrom=LG_VI strand=- start=4987087 end=4994652 cdsStart=4987519 cdsEnd=4993055 sfCount=11 sfStarts=4987087,4987745,4988221,4988429,4989377,4989814,4990107,4990267,4991434,4992672,4994339, sfEnds=4987647,4987783,4988343,4988488,4989457,4989904,4990178,4990367,4991532,4993174,4994652,	-	-	-
911738	171	35	37.92	11.71	-1.69522	Down	1.59e-12	4.15e-11	jgi|Poptr1_1|911738|e_gw1.XVIII.1739.1|CDS chrom=LG_XVIII strand=- start=5867354 end=5869369 cdsStart=5867354 cdsEnd=5869369 sfCount=1 sfStarts=5867354, sfEnds=5869369,	-	-	-
819318	244	50	54.11	16.72	-1.69432	Down	2.89e-17	1.25e-15	jgi|Poptr1_1|819318|estExt_fgenesh4_pg.C_LG_VI1075|CDS chrom=LG_VI strand=- start=10448484 end=10453444 cdsStart=10448655 cdsEnd=10453337 sfCount=6 sfStarts=10448484,10448827,10451339,10451569,10451924,10453115, sfEnds=10448760,10448885,10451476,10451817,10452168,10453444,	GO:0000151//ubiquitin ligase complex	GO:0004842//ubiquitin-protein ligase activity;GO:0008270//zinc ion binding	GO:0016567//protein ubiquitination
1085621	78	16	17.3	5.35	-1.69316	Down	2.25e-06	2.5e-05	jgi|Poptr1_1|1085621|estExt_Genewise1Plus.C_LG_VIII2518|CDS chrom=LG_VIII strand=- start=12625244 end=12627425 cdsStart=12625655 cdsEnd=12627425 sfCount=2 sfStarts=12625244,12627357, sfEnds=12626752,12627425,	-	-	-
803966	234	48	51.89	16.05	-1.69288	Down	1.34e-16	5.57e-15	jgi|Poptr1_1|803966|fgenesh4_pm.C_LG_IX000013|CDS chrom=LG_IX strand=- start=127600 end=130976 cdsStart=127600 cdsEnd=130976 sfCount=7 sfStarts=127600,127855,128297,128801,129405,129648,130223, sfEnds=127737,128079,128464,128916,129557,129791,130976,	-	GO:0004672//protein kinase activity;GO:0005524//ATP binding;GO:0004713//protein tyrosine kinase activity;GO:0005509//calcium ion binding;GO:0004674//protein serine/threonine kinase activity;GO:0004675//transmembrane receptor protein serine/threonine kinase activity;GO:0004676//3-phosphoinositide-dependent protein kinase activity;GO:0004677//DNA-dependent protein kinase activity;GO:0004679//AMP-ac…	GO:0006468//protein amino acid phosphorylation
757573	497	102	110.22	34.11	-1.69212	Down	1.38e-33	1.18e-31	jgi|Poptr1_1|757573|fgenesh4_pg.C_LG_III001115|CDS chrom=LG_III strand=- start=12521894 end=12526895 cdsStart=12521894 cdsEnd=12526895 sfCount=9 sfStarts=12521894,12523698,12524336,12524950,12525076,12525975,12526106,12526448,12526893, sfEnds=12522993,12523952,12524450,12525002,12525336,12526025,12526354,12526691,12526895,	GO:0016020//membrane	GO:0015079//potassium ion transmembrane transporter activity	GO:0006813//potassium ion transport
742864	107	22	23.73	7.36	-1.68893	Down	2.8e-08	4.25e-07	jgi|Poptr1_1|742864|estExt_Genewise1_v1.C_970035|CDS chrom=scaffold_97 strand=+ start=189103 end=197903 cdsStart=189235 cdsEnd=197903 sfCount=22 sfStarts=189103,189683,189860,190790,190970,191123,191279,191403,191576,192006,192347,192544,193345,194417,194861,195353,195703,195892,196660,197333,197518,197805, sfEnds=189253,189749,189962,190860,191033,191188,191326,191465,191632,192164,192415,192635…	-	-	-
594422	107	22	23.73	7.36	-1.68893	Down	2.8e-08	4.24e-07	jgi|Poptr1_1|594422|eugene3.00640010|CDS chrom=scaffold_64 strand=+ start=97853 end=110212 cdsStart=97853 cdsEnd=110050 sfCount=17 sfStarts=97853,100798,102857,103310,103901,104275,105414,106013,106219,107068,107260,107525,107926,108559,108925,109159,109874, sfEnds=100436,101985,103224,103813,104001,105295,105485,106123,106319,107167,107355,107818,107979,108806,109033,109461,110212,	-	-	-
663368	68	14	15.08	4.68	-1.68806	Down	1.09e-05	0.000104122	jgi|Poptr1_1|663368|grail3.0055013101|CDS chrom=LG_XIII strand=+ start=7966052 end=7968404 cdsStart=7966408 cdsEnd=7968404 sfCount=3 sfStarts=7966052,7967431,7968207, sfEnds=7966686,7967640,7968404,	-	-	-
836277	296	61	65.64	20.4	-1.68601	Down	1.63e-20	8.35e-19	jgi|Poptr1_1|836277|estExt_fgenesh4_pm.C_280158|CDS chrom=scaffold_28 strand=- start=3517591 end=3524522 cdsStart=3517973 cdsEnd=3524522 sfCount=9 sfStarts=3517591,3518216,3519460,3519697,3520720,3521159,3521453,3523871,3524145, sfEnds=3518078,3518319,3519537,3519861,3520808,3521327,3521529,3524036,3524522,	GO:0000151//ubiquitin ligase complex	GO:0004842//ubiquitin-protein ligase activity;GO:0008270//zinc ion binding	GO:0016567//protein ubiquitination
1073460	121	25	26.83	8.36	-1.68227	Down	3.74e-09	6.57e-08	jgi|Poptr1_1|1073460|estExt_Genewise1Plus.C_LG_III0405|CDS chrom=LG_III strand=- start=4385127 end=4390176 cdsStart=4385509 cdsEnd=4390176 sfCount=7 sfStarts=4385127,4386037,4387170,4388002,4388514,4389478,4389897, sfEnds=4385631,4386237,4387373,4388130,4389245,4389788,4390176,	-	-	-
561843	121	25	26.83	8.36	-1.68227	Down	3.74e-09	6.56e-08	jgi|Poptr1_1|561843|eugene3.00061802|CDS chrom=LG_VI strand=+ start=16884740 end=16887025 cdsStart=16885277 cdsEnd=16886815 sfCount=1 sfStarts=16884740, sfEnds=16887025,	-	GO:0008415//acyltransferase activity	GO:0009058//biosynthetic process
1081443	58	12	12.86	4.01	-1.68122	Down	5.38e-05	0.000435239	jgi|Poptr1_1|1081443|estExt_Genewise1Plus.C_LG_VI2413|CDS chrom=LG_VI strand=- start=15563125 end=15566201 cdsStart=15563420 cdsEnd=15566201 sfCount=8 sfStarts=15563125,15564501,15564791,15565044,15565265,15565471,15565772,15566010, sfEnds=15563735,15564601,15564943,15565170,15565368,15565572,15565915,15566201,	-	-	-
757335	111	23	24.62	7.69	-1.67878	Down	1.78e-08	2.84e-07	jgi|Poptr1_1|757335|fgenesh4_pg.C_LG_III000877|CDS chrom=LG_III strand=+ start=10562894 end=10566955 cdsStart=10562894 cdsEnd=10566955 sfCount=9 sfStarts=10562894,10563063,10563391,10563689,10564018,10564208,10564591,10564964,10565916, sfEnds=10563006,10563201,10563616,10563934,10564068,10564468,10564758,10565260,10566955,	GO:0016020//membrane	GO:0015079//potassium ion transmembrane transporter activity	GO:0006813//potassium ion transport
833382	82	17	18.19	5.69	-1.67664	Down	1.42e-06	1.66e-05	jgi|Poptr1_1|833382|estExt_fgenesh4_pm.C_LG_X0062|CDS chrom=LG_X strand=+ start=2138935 end=2146158 cdsStart=2138935 cdsEnd=2146158 sfCount=12 sfStarts=2138935,2139538,2140409,2141219,2141476,2141854,2142299,2142957,2144514,2144825,2145517,2145976, sfEnds=2139144,2139759,2140600,2141320,2141553,2141935,2142461,2143286,2144732,2145422,2145582,2146158,	GO:0005875//microtubule associated complex	GO:0003777//microtubule motor activity;GO:0005524//ATP binding;GO:0008574//plus-end-directed microtubule motor activity	GO:0007018//microtubule-based movement
806082	53	11	11.75	3.68	-1.67488	Down	0.000119902	0.000894187	jgi|Poptr1_1|806082|fgenesh4_pm.C_LG_XI000357|CDS chrom=LG_XI strand=- start=13197171 end=13203235 cdsStart=13197171 cdsEnd=13203235 sfCount=15 sfStarts=13197171,13197339,13197563,13197973,13198447,13198716,13199919,13200290,13200498,13201019,13201193,13201995,13202775,13202946,13203195, sfEnds=13197248,13197416,13197724,13198194,13198593,13198782,13199975,13200364,13200538,13201076,13201377,1320…	-	GO:0005489//electron transporter activity;GO:0003756//protein disulfide isomerase activity	GO:0006118//electron transport
787442	53	11	11.75	3.68	-1.67488	Down	0.000119902	0.000893635	jgi|Poptr1_1|787442|fgenesh4_pg.C_scaffold_211000011|CDS chrom=scaffold_211 strand=- start=182007 end=183831 cdsStart=182007 cdsEnd=183831 sfCount=2 sfStarts=182007,182639, sfEnds=182604,183831,	GO:0005634//nucleus	-	-
660905	77	16	17.08	5.35	-1.6747	Down	3.12e-06	3.39e-05	jgi|Poptr1_1|660905|grail3.0014007701|CDS chrom=LG_XI strand=+ start=11181543 end=11183534 cdsStart=11181810 cdsEnd=11183534 sfCount=2 sfStarts=11181543,11183469, sfEnds=11183324,11183534,	-	-	-
578799	202	42	44.8	14.05	-1.67293	Down	2.62e-14	8.97e-13	jgi|Poptr1_1|578799|eugene3.00181023|CDS chrom=LG_XVIII strand=- start=11207944 end=11223686 cdsStart=11208323 cdsEnd=11223686 sfCount=23 sfStarts=11207944,11208284,11209238,11209774,11209968,11210728,11211423,11211794,11212317,11212509,11213599,11214285,11214913,11215715,11215884,11216361,11217263,11218475,11219710,11220086,11221591,11221849,11223342, sfEnds=11208197,11208415,11209339,11209869,1…	-	-	-
1079542	72	15	15.97	5.02	-1.66961	Down	6.88e-06	6.87e-05	jgi|Poptr1_1|1079542|estExt_Genewise1Plus.C_LG_V4618|CDS chrom=LG_V strand=- start=16334955 end=16337854 cdsStart=16335190 cdsEnd=16337583 sfCount=1 sfStarts=16334955, sfEnds=16337854,	-	-	-
230664	67	14	14.86	4.68	-1.66685	Down	1.52e-05	0.000140241	jgi|Poptr1_1|230664|gw1.X.5361.1|CDS chrom=LG_X strand=- start=7578911 end=7581051 cdsStart=7578911 cdsEnd=7581051 sfCount=7 sfStarts=7580721,7580525,7580333,7580159,7579588,7579126,7578911, sfEnds=7581051,7580615,7580407,7580228,7579735,7579287,7578943,	-	GO:0004672//protein kinase activity;GO:0005524//ATP binding;GO:0004713//protein tyrosine kinase activity;GO:0004674//protein serine/threonine kinase activity	GO:0006468//protein amino acid phosphorylation
595034	1416	296	314.03	99	-1.6654	Down	1.14e-90	2.22e-88	jgi|Poptr1_1|595034|eugene3.00660228|CDS chrom=scaffold_66 strand=+ start=1528205 end=1532636 cdsStart=1528205 cdsEnd=1532636 sfCount=6 sfStarts=1528205,1528761,1529754,1530661,1531194,1531670, sfEnds=1528680,1529153,1530561,1531065,1531531,1532636,	GO:0016020//membrane	GO:0016760//cellulose synthase (UDP-forming) activity	GO:0030244//cellulose biosynthetic process
555075	105	22	23.29	7.36	-1.66193	Down	5.38e-08	7.83e-07	jgi|Poptr1_1|555075|eugene3.00031708|CDS chrom=LG_III strand=+ start=17604004 end=17606739 cdsStart=17604004 cdsEnd=17606739 sfCount=4 sfStarts=17604004,17604267,17605396,17606463, sfEnds=17604156,17605247,17606321,17606739,	-	-	-
253984	62	13	13.75	4.35	-1.66034	Down	3.37e-05	0.000286985	jgi|Poptr1_1|253984|gw1.XV.3420.1|CDS chrom=LG_XV strand=+ start=10434385 end=10438675 cdsStart=10434385 cdsEnd=10438675 sfCount=12 sfStarts=10434385,10434669,10435031,10435157,10435800,10436012,10436394,10437296,10437970,10438227,10438446,10438608, sfEnds=10434517,10434796,10435075,10435210,10435904,10436215,10436479,10437915,10438151,10438305,10438553,10438675,	GO:0005634//nucleus	GO:0003676//nucleic acid binding;GO:0008270//zinc ion binding	-
650703	124	26	27.5	8.7	-1.66034	Down	3.29e-09	5.82e-08	jgi|Poptr1_1|650703|grail3.0026011301|CDS chrom=LG_V strand=- start=1051637 end=1053643 cdsStart=1051637 cdsEnd=1053586 sfCount=2 sfStarts=1051637,1053354, sfEnds=1052075,1053643,	-	GO:0005525//GTP binding;GO:0003924//GTPase activity;GO:0003925//small monomeric GTPase activity	GO:0007264//small GTPase mediated signal transduction;GO:0006886//intracellular protein transport;GO:0015031//protein transport
825806	95	20	21.07	6.69	-1.65511	Down	2.58e-07	3.44e-06	jgi|Poptr1_1|825806|estExt_fgenesh4_pg.C_LG_XVIII0537|CDS chrom=LG_XVIII strand=+ start=6663010 end=6668176 cdsStart=6663757 cdsEnd=6667858 sfCount=9 sfStarts=6663010,6663589,6664839,6665799,6666001,6666859,6667035,6667425,6667700, sfEnds=6663103,6663836,6664966,6665897,6666159,6666945,6667126,6667499,6668176,	GO:0008287//protein serine/threonine phosphatase complex;GO:0005963;GO:0017023//myosin phosphatase complex	GO:0004722//protein serine/threonine phosphatase activity;GO:0003824//catalytic activity;GO:0000158;GO:0004721//phosphoprotein phosphatase activity;GO:0004723//calcium-dependent protein serine/threonine phosphatase activity;GO:0004724//magnesium-dependent protein serine/threonine phosphatase activity;GO:0008420//CTD phosphatase activity;GO:0008597//calcium-dependent protein serine/threonine phosp…	GO:0006470//protein amino acid dephosphorylation
595462	114	24	25.28	8.03	-1.65452	Down	1.56e-08	2.51e-07	jgi|Poptr1_1|595462|eugene3.00700103|CDS chrom=scaffold_70 strand=+ start=667272 end=670809 cdsStart=667272 cdsEnd=670577 sfCount=2 sfStarts=667272,670066, sfEnds=669486,670809,	-	GO:0004197//cysteine-type endopeptidase activity;GO:0004672//protein kinase activity;GO:0005524//ATP binding;GO:0004713//protein tyrosine kinase activity;GO:0004553//hydrolase activity, hydrolyzing O-glycosyl compounds;GO:0004674//protein serine/threonine kinase activity;GO:0004675//transmembrane receptor protein serine/threonine kinase activity;GO:0004676//3-phosphoinositide-dependent protein ki…	GO:0006508//proteolysis;GO:0006468//protein amino acid phosphorylation;GO:0005975//carbohydrate metabolic process
836364	351	74	77.84	24.75	-1.65308	Down	1.9e-23	1.13e-21	jgi|Poptr1_1|836364|estExt_fgenesh4_pm.C_290133|CDS chrom=scaffold_29 strand=- start=2922753 end=2931065 cdsStart=2922753 cdsEnd=2931065 sfCount=22 sfStarts=2922753,2923220,2923422,2923829,2924051,2924572,2924793,2925053,2925167,2926354,2926599,2926754,2927599,2928316,2928515,2928666,2928864,2929263,2929651,2930285,2930723,2930928, sfEnds=2922860,2923321,2923517,2923969,2924095,2924673,2924947,29…	-	-	-
817474	507	107	112.44	35.79	-1.65153	Down	3.73e-33	3.1e-31	jgi|Poptr1_1|817474|estExt_fgenesh4_pg.C_LG_III1286|CDS chrom=LG_III strand=+ start=14073883 end=14079154 cdsStart=14073883 cdsEnd=14077819 sfCount=10 sfStarts=14073883,14075084,14075951,14076511,14077068,14077505,14077702,14078915,14079035,14079099, sfEnds=14074944,14075214,14076382,14076982,14077209,14077598,14078442,14079015,14079076,14079154,	GO:0000151//ubiquitin ligase complex	GO:0004842//ubiquitin-protein ligase activity;GO:0008270//zinc ion binding	GO:0016567//protein ubiquitination
572117	71	15	15.75	5.02	-1.64959	Down	9.55e-06	9.26e-05	jgi|Poptr1_1|572117|eugene3.00140162|CDS chrom=LG_XIV strand=+ start=1498773 end=1508278 cdsStart=1498773 cdsEnd=1508247 sfCount=11 sfStarts=1498773,1501780,1502219,1502632,1503165,1503824,1504755,1505389,1505845,1506349,1507636, sfEnds=1499980,1502097,1502564,1503054,1503457,1504097,1505260,1505710,1506226,1507016,1508278,	-	-	-
752210	71	15	15.75	5.02	-1.64959	Down	9.55e-06	9.26e-05	jgi|Poptr1_1|752210|fgenesh4_pg.C_LG_I001813|CDS chrom=LG_I strand=+ start=18192959 end=18194417 cdsStart=18192959 cdsEnd=18194417 sfCount=2 sfStarts=18192959,18193464, sfEnds=18193258,18194417,	GO:0005634//nucleus	GO:0005515//protein binding;GO:0003677//DNA binding	-
755781	208	44	46.13	14.72	-1.64793	Down	2.03e-14	6.99e-13	jgi|Poptr1_1|755781|fgenesh4_pg.C_LG_II001961|CDS chrom=LG_II strand=- start=17897903 end=17907718 cdsStart=17897903 cdsEnd=17907718 sfCount=14 sfStarts=17897903,17899377,17900035,17901084,17901323,17902301,17903020,17903091,17903779,17905184,17905381,17905912,17907257,17907399, sfEnds=17899023,17899583,17900695,17901245,17901437,17902508,17903034,17903412,17903783,17905279,17905577,17906259,1790…	-	-	-
1113907	85	18	18.85	6.02	-1.64673	Down	1.24e-06	1.47e-05	jgi|Poptr1_1|1113907|estExt_Genewise1Plus.C_1070186|CDS chrom=scaffold_107 strand=- start=833393 end=841076 cdsStart=833698 cdsEnd=841076 sfCount=10 sfStarts=833393,833481,833688,836535,836813,836984,837117,837611,839313,840719, sfEnds=833453,833602,834293,836628,836895,837035,837274,837701,840280,841076,	-	-	-
722938	85	18	18.85	6.02	-1.64673	Down	1.24e-06	1.47e-05	jgi|Poptr1_1|722938|estExt_Genewise1_v1.C_LG_IX3554|CDS chrom=LG_IX strand=+ start=7206172 end=7210275 cdsStart=7206172 cdsEnd=7209843 sfCount=9 sfStarts=7206172,7207381,7207649,7208044,7208287,7208596,7208898,7209697,7210233, sfEnds=7206690,7207504,7207792,7208196,7208402,7208763,7209128,7210210,7210275,	-	GO:0004675//transmembrane receptor protein serine/threonine kinase activity;GO:0004676//3-phosphoinositide-dependent protein kinase activity;GO:0004677//DNA-dependent protein kinase activity;GO:0004679//AMP-activated protein kinase activity;GO:0004680//casein kinase activity;GO:0004681//casein kinase I activity;GO:0004683//calmodulin-dependent protein kinase activity;GO:0004686//elongation factor…	-
765583	66	14	14.64	4.68	-1.64534	Down	2.11e-05	0.000187946	jgi|Poptr1_1|765583|fgenesh4_pg.C_LG_VIII000597|CDS chrom=LG_VIII strand=- start=4256981 end=4267273 cdsStart=4256981 cdsEnd=4267273 sfCount=25 sfStarts=4256981,4257926,4258066,4258387,4258658,4258867,4260677,4260946,4261134,4261592,4261849,4262734,4262979,4263186,4263638,4264478,4264565,4265075,4265399,4265775,4265992,4266182,4266491,4266858,4267178, sfEnds=4257088,4257988,4258166,4258576,425875…	GO:0016021//integral to membrane	-	GO:0016192//vesicle-mediated transport
1078935	113	24	25.06	8.03	-1.64191	Down	2.16e-08	3.36e-07	jgi|Poptr1_1|1078935|estExt_Genewise1Plus.C_LG_V3618|CDS chrom=LG_V strand=- start=13803042 end=13807441 cdsStart=13803436 cdsEnd=13807441 sfCount=9 sfStarts=13803042,13804069,13804985,13805202,13805580,13805945,13806549,13806695,13807045, sfEnds=13803879,13804153,13805086,13805413,13805735,13806094,13806608,13806822,13807441,	-	-	-
262189	183	39	40.58	13.04	-1.63782	Down	9.58e-13	2.58e-11	jgi|Poptr1_1|262189|gw1.XVIII.2730.1|CDS chrom=LG_XVIII strand=- start=9415752 end=9419004 cdsStart=9415752 cdsEnd=9419004 sfCount=6 sfStarts=9418772,9418364,9417301,9416502,9416115,9415752, sfEnds=9419004,9418666,9417620,9416917,9416300,9416039,	-	-	-
818024	61	13	13.53	4.35	-1.63707	Down	4.68e-05	0.000382746	jgi|Poptr1_1|818024|estExt_fgenesh4_pg.C_LG_IV1052|CDS chrom=LG_IV strand=+ start=11418748 end=11429010 cdsStart=11418748 cdsEnd=11427053 sfCount=19 sfStarts=11418748,11419077,11419219,11419448,11419795,11420028,11421010,11421223,11421397,11422576,11422970,11423180,11423295,11425339,11425982,11426164,11427010,11428125,11428549, sfEnds=11418912,11419139,11419374,11419525,11419899,11420138,11421051…	-	-	-
1079894	61	13	13.53	4.35	-1.63707	Down	4.68e-05	0.000382486	jgi|Poptr1_1|1079894|estExt_Genewise1Plus.C_LG_V5097|CDS chrom=LG_V strand=- start=17435797 end=17439029 cdsStart=17435797 cdsEnd=17438595 sfCount=4 sfStarts=17435797,17437065,17437839,17438936, sfEnds=17436152,17437361,17438612,17439029,	-	-	-
559339	61	13	13.53	4.35	-1.63707	Down	4.68e-05	0.000382227	jgi|Poptr1_1|559339|eugene3.00050954|CDS chrom=LG_V strand=+ start=12664439 end=12667922 cdsStart=12664439 cdsEnd=12667922 sfCount=8 sfStarts=12664439,12664806,12665512,12665750,12666020,12666388,12667219,12667626, sfEnds=12664654,12664862,12665620,12665934,12666108,12666643,12667464,12667922,	-	-	-
806969	410	88	90.93	29.43	-1.62747	Down	1.41e-26	9.37e-25	jgi|Poptr1_1|806969|fgenesh4_pm.C_LG_XIII000269|CDS chrom=LG_XIII strand=- start=4635409 end=4640687 cdsStart=4635409 cdsEnd=4640687 sfCount=10 sfStarts=4635409,4636125,4636470,4636936,4637876,4638175,4638989,4639405,4640143,4640638, sfEnds=4635636,4636371,4636582,4637494,4638053,4638308,4639158,4639506,4640371,4640687,	-	-	-
752064	899	193	199.37	64.55	-1.62696	Down	2.25e-56	3.15e-54	jgi|Poptr1_1|752064|fgenesh4_pg.C_LG_I001667|CDS chrom=LG_I strand=+ start=16980898 end=16986609 cdsStart=16980898 cdsEnd=16986609 sfCount=6 sfStarts=16980898,16982118,16983551,16984749,16985258,16986196, sfEnds=16982023,16983223,16984489,16985060,16985749,16986609,	-	-	-
582982	312	67	69.19	22.41	-1.62642	Down	1.44e-20	7.44e-19	jgi|Poptr1_1|582982|eugene3.01450060|CDS chrom=scaffold_145 strand=+ start=785791 end=788266 cdsStart=785791 cdsEnd=786801 sfCount=4 sfStarts=785791,786957,788251, sfEnds=786852,787178,788266,	-	-	-
427561	135	29	29.94	9.7	-1.62602	Down	1.16e-09	2.17e-08	jgi|Poptr1_1|427561|gw1.VI.1233.1|CDS chrom=LG_VI strand=- start=7199328 end=7204767 cdsStart=7199328 cdsEnd=7204767 sfCount=5 sfStarts=7204470,7203014,7201080,7200688,7199328, sfEnds=7204767,7204400,7201371,7200997,7199530,	-	-	-
901149	265	57	58.77	19.06	-1.62453	Down	1.19e-17	5.3e-16	jgi|Poptr1_1|901149|e_gw1.XV.2221.1|CDS chrom=LG_XV strand=- start=7378747 end=7380448 cdsStart=7378747 cdsEnd=7380448 sfCount=6 sfStarts=7378747,7379114,7379285,7379554,7379878,7380212, sfEnds=7378986,7379182,7379462,7379667,7380011,7380448,	-	-	-
753768	315	68	69.86	22.74	-1.61923	Down	1.26e-20	6.57e-19	jgi|Poptr1_1|753768|fgenesh4_pg.C_LG_I003371|CDS chrom=LG_I strand=+ start=35209949 end=35213222 cdsStart=35209949 cdsEnd=35213222 sfCount=10 sfStarts=35209949,35210172,35210417,35210695,35210949,35211610,35211822,35212171,35212379,35212687, sfEnds=35210079,35210269,35210581,35210797,35211486,35211707,35212067,35212303,35212592,35213222,	-	GO:0004289;GO:0008233//peptidase activity;GO:0042802//identical protein binding	GO:0006508//proteolysis;GO:0043086//negative regulation of catalytic activity
293950	389	84	86.27	28.09	-1.6188	Down	4.09e-25	2.56e-23	jgi|Poptr1_1|293950|gw1.66.623.1|CDS chrom=scaffold_66 strand=- start=1417693 end=1422450 cdsStart=1417693 cdsEnd=1422450 sfCount=5 sfStarts=1422372,1421533,1418982,1418480,1417693, sfEnds=1422450,1422099,1419922,1418667,1418122,	GO:0016020//membrane;GO:0016021//integral to membrane	GO:0005351//sugar:hydrogen symporter activity;GO:0005215//transporter activity;GO:0008733	GO:0008643//carbohydrate transport;GO:0006810//transport
595505	403	87	89.37	29.1	-1.61877	Down	5.67e-26	3.7e-24	jgi|Poptr1_1|595505|eugene3.00700146|CDS chrom=scaffold_70 strand=+ start=927931 end=932504 cdsStart=927931 cdsEnd=932210 sfCount=14 sfStarts=927931,928375,928779,929209,929355,929497,929824,930377,930553,930740,931013,931261,931418,931872, sfEnds=928104,928493,928876,929268,929401,929691,929870,930443,930653,930841,931151,931323,931501,932504,	GO:0016021//integral to membrane	GO:0015385//sodium:hydrogen antiporter activity;GO:0015299//solute:hydrogen antiporter activity	GO:0006814//sodium ion transport;GO:0006885//regulation of pH
768420	555	120	123.08	40.13	-1.61684	Down	4.01e-35	3.58e-33	jgi|Poptr1_1|768420|fgenesh4_pg.C_LG_IX001471|CDS chrom=LG_IX strand=- start=11341074 end=11342656 cdsStart=11341074 cdsEnd=11342656 sfCount=2 sfStarts=11341074,11342137, sfEnds=11342014,11342656,	-	GO:0016758//transferase activity, transferring hexosyl groups;GO:0047893//flavonol 3-O-glucosyltransferase activity	GO:0008152//metabolic process
832433	217	47	48.12	15.72	-1.61404	Down	1.36e-14	4.75e-13	jgi|Poptr1_1|832433|estExt_fgenesh4_pm.C_LG_VII0495|CDS chrom=LG_VII strand=- start=12139472 end=12143789 cdsStart=12139820 cdsEnd=12143579 sfCount=9 sfStarts=12139472,12139718,12140227,12140834,12141335,12141761,12142097,12142476,12143331, sfEnds=12139686,12139924,12140505,12141109,12141553,12141929,12142271,12142587,12143789,	GO:0005622//intracellular	GO:0003700//transcription factor activity;GO:0004497//monooxygenase activity;GO:0016491//oxidoreductase activity;GO:0004506//squalene monooxygenase activity	GO:0006355//regulation of transcription, DNA-dependent;GO:0006725//cellular aromatic compound metabolic process;GO:0006118//electron transport;GO:0008152//metabolic process
661646	60	13	13.31	4.35	-1.61342	Down	6.47e-05	0.000512954	jgi|Poptr1_1|661646|grail3.0031027701|CDS chrom=LG_XII strand=+ start=3317209 end=3318864 cdsStart=3317209 cdsEnd=3318862 sfCount=2 sfStarts=3317209,3318680, sfEnds=3318570,3318864,	-	-	-
755476	83	18	18.41	6.02	-1.61265	Down	2.36e-06	2.61e-05	jgi|Poptr1_1|755476|fgenesh4_pg.C_LG_II001656|CDS chrom=LG_II strand=+ start=14066628 end=14071402 cdsStart=14066628 cdsEnd=14071402 sfCount=8 sfStarts=14066628,14067437,14067697,14067915,14068815,14069098,14070154,14071301, sfEnds=14066835,14067598,14067827,14068046,14068989,14069503,14070922,14071402,	-	GO:0004365//glyceraldehyde-3-phosphate dehydrogenase (phosphorylating) activity;GO:0051287//NAD binding;GO:0000156//two-component response regulator activity;GO:0003677//DNA binding	GO:0006096//glycolysis;GO:0000160//two-component signal transduction system (phosphorelay);GO:0006355//regulation of transcription, DNA-dependent
424988	143	31	31.71	10.37	-1.61252	Down	4.64e-10	9.21e-09	jgi|Poptr1_1|424988|gw1.III.1390.1|CDS chrom=LG_III strand=+ start=9553871 end=9558698 cdsStart=9553871 cdsEnd=9558698 sfCount=10 sfStarts=9553871,9554832,9555069,9556113,9556248,9556432,9556842,9557356,9557987,9558642, sfEnds=9554015,9554988,9555288,9556166,9556327,9556709,9557237,9557762,9558142,9558698,	-	-	-
764958	1019	221	225.98	73.91	-1.61235	Down	6.91e-63	1.1e-60	jgi|Poptr1_1|764958|fgenesh4_pg.C_LG_VII001303|CDS chrom=LG_VII strand=+ start=12604601 end=12609015 cdsStart=12604601 cdsEnd=12609015 sfCount=16 sfStarts=12604601,12605327,12605557,12605733,12605949,12606100,12606265,12606410,12606664,12606826,12607293,12607750,12608173,12608422,12608677,12608950, sfEnds=12604685,12605459,12605628,12605798,12606020,12606171,12606336,12606475,12606729,12607115,12…	-	GO:0004672//protein kinase activity;GO:0005524//ATP binding;GO:0004713//protein tyrosine kinase activity;GO:0004674//protein serine/threonine kinase activity;GO:0008237//metallopeptidase activity;GO:0008270//zinc ion binding;GO:0004675//transmembrane receptor protein serine/threonine kinase activity;GO:0004676//3-phosphoinositide-dependent protein kinase activity;GO:0004677//DNA-dependent protein…	GO:0006468//protein amino acid phosphorylation;GO:0006508//proteolysis
653497	281	61	62.32	20.4	-1.61113	Down	1.96e-18	9.22e-17	jgi|Poptr1_1|653497|grail3.0030011401|CDS chrom=LG_VI strand=+ start=11216226 end=11217739 cdsStart=11216252 cdsEnd=11217739 sfCount=1 sfStarts=11216226, sfEnds=11217739,	-	-	-
772952	3922	852	869.78	284.95	-1.60994	Down	2.23e-236	6.1e-234	jgi|Poptr1_1|772952|fgenesh4_pg.C_LG_XII000727|CDS chrom=LG_XII strand=- start=9012825 end=9015030 cdsStart=9012825 cdsEnd=9015030 sfCount=3 sfStarts=9012825,9013101,9014286, sfEnds=9013009,9014006,9015030,	-	-	-
726390	529	115	117.32	38.46	-1.60902	Down	2.47e-33	2.08e-31	jgi|Poptr1_1|726390|estExt_Genewise1_v1.C_LG_X5521|CDS chrom=LG_X strand=+ start=8402279 end=8412556 cdsStart=8403238 cdsEnd=8412297 sfCount=14 sfStarts=8402279,8403192,8404232,8405438,8405624,8405768,8406876,8407299,8408367,8408975,8409470,8410032,8410930,8412003, sfEnds=8402400,8403415,8404343,8405526,8405692,8405900,8407034,8407647,8408479,8409125,8409945,8410239,8411936,8412556,	-	GO:0003676//nucleic acid binding	-
171987	69	15	15.3	5.02	-1.60777	Down	1.83e-05	0.000164024	jgi|Poptr1_1|171987|gw1.I.587.1|CDS chrom=LG_I strand=+ start=15502104 end=15512130 cdsStart=15502104 cdsEnd=15512130 sfCount=22 sfStarts=15502104,15502988,15503476,15503647,15503841,15504002,15504318,15505052,15506087,15506274,15506937,15507872,15508198,15508553,15509217,15510445,15510576,15510854,15511139,15511586,15511813,15512050, sfEnds=15502548,15503041,15503536,15503725,15503920,15504096,1…	GO:0005963;GO:0017023//myosin phosphatase complex	GO:0003677//DNA binding;GO:0003918//DNA topoisomerase (ATP-hydrolyzing) activity;GO:0005524//ATP binding;GO:0016787//hydrolase activity;GO:0000158;GO:0004721//phosphoprotein phosphatase activity;GO:0004723//calcium-dependent protein serine/threonine phosphatase activity;GO:0004724//magnesium-dependent protein serine/threonine phosphatase activity;GO:0008420//CTD phosphatase activity;GO:0008597//c…	GO:0006259//DNA metabolic process;GO:0006265//DNA topological change
1090329	234	51	51.89	17.06	-1.60484	Down	1.62e-15	5.99e-14	jgi|Poptr1_1|1090329|estExt_Genewise1Plus.C_LG_X2389|CDS chrom=LG_X strand=+ start=9733726 end=9737664 cdsStart=9733774 cdsEnd=9737664 sfCount=7 sfStarts=9733726,9734235,9734637,9736025,9736718,9737144,9737488, sfEnds=9733944,9734313,9734936,9736182,9736834,9737323,9737664,	-	-	-
756823	78	17	17.3	5.69	-1.60427	Down	5.19e-06	5.39e-05	jgi|Poptr1_1|756823|fgenesh4_pg.C_LG_III000365|CDS chrom=LG_III strand=- start=4763723 end=4767939 cdsStart=4763723 cdsEnd=4767939 sfCount=12 sfStarts=4763723,4764230,4764655,4765277,4765444,4766048,4766253,4767004,4767210,4767402,4767681,4767862, sfEnds=4763881,4764359,4764761,4765370,4765640,4766119,4766367,4767120,4767301,4767578,4767755,4767939,	-	GO:0008565//protein transporter activity	GO:0006886//intracellular protein transport
1100674	165	36	36.59	12.04	-1.60361	Down	2.51e-11	5.68e-10	jgi|Poptr1_1|1100674|estExt_Genewise1Plus.C_LG_XV0287|CDS chrom=LG_XV strand=- start=649636 end=652765 cdsStart=650050 cdsEnd=652765 sfCount=6 sfStarts=649636,650956,651612,652093,652479,652537, sfEnds=650292,651340,652013,652442,652486,652765,	-	-	-
816416	142	31	31.49	10.37	-1.60248	Down	6.37e-10	1.24e-08	jgi|Poptr1_1|816416|estExt_fgenesh4_pg.C_LG_II1007|CDS chrom=LG_II strand=+ start=8125151 end=8142595 cdsStart=8125151 cdsEnd=8142086 sfCount=20 sfStarts=8125151,8125631,8126163,8127425,8127975,8128779,8129052,8130548,8130983,8131210,8131767,8132008,8135186,8137298,8138038,8138602,8139276,8140603,8141145,8141924, sfEnds=8125221,8125742,8126429,8127630,8128191,8128949,8129129,8130799,8131034,81313…	-	-	-
577198	375	82	83.16	27.42	-1.60066	Down	6.61e-24	4.01e-22	jgi|Poptr1_1|577198|eugene3.00161333|CDS chrom=LG_XVI strand=+ start=13242690 end=13246817 cdsStart=13243943 cdsEnd=13246551 sfCount=7 sfStarts=13242690,13243622,13244801,13244971,13245205,13245827,13246249, sfEnds=13242767,13244581,13244883,13245091,13245378,13245934,13246817,	GO:0005952//cAMP-dependent protein kinase complex;GO:0005956//protein kinase CK2 complex	GO:0004672//protein kinase activity;GO:0005524//ATP binding;GO:0004674//protein serine/threonine kinase activity;GO:0004713//protein tyrosine kinase activity;GO:0004682//protein kinase CK2 activity;GO:0004691//cAMP-dependent protein kinase activity;GO:0008603//cAMP-dependent protein kinase regulator activity;GO:0008605//protein kinase CK2 regulator activity	GO:0006468//protein amino acid phosphorylation
650103	96	21	21.29	7.02	-1.60063	Down	4.26e-07	5.52e-06	jgi|Poptr1_1|650103|grail3.0001103901|CDS chrom=LG_IX strand=+ start=7486892 end=7487935 cdsStart=7487345 cdsEnd=7487935 sfCount=2 sfStarts=7486892,7487274, sfEnds=7487103,7487935,	-	-	-
551963	64	14	14.19	4.68	-1.60029	Down	4.03e-05	0.000339362	jgi|Poptr1_1|551963|eugene3.00021278|CDS chrom=LG_II strand=+ start=10333556 end=10335541 cdsStart=10333585 cdsEnd=10335255 sfCount=3 sfStarts=10333556,10334371,10335196, sfEnds=10333806,10334547,10335541,	GO:0005634//nucleus	-	GO:0007530//sex determination
834917	205	45	45.46	15.05	-1.59483	Down	1.19e-13	3.77e-12	jgi|Poptr1_1|834917|estExt_fgenesh4_pm.C_LG_XIV0389|CDS chrom=LG_XIV strand=+ start=7210442 end=7214010 cdsStart=7210586 cdsEnd=7213799 sfCount=2 sfStarts=7210442,7213104, sfEnds=7211152,7214010,	-	GO:0003824//catalytic activity	GO:0008152//metabolic process
801030	68	15	15.08	5.02	-1.58688	Down	2.52e-05	0.000221072	jgi|Poptr1_1|801030|fgenesh4_pm.C_LG_V000122|CDS chrom=LG_V strand=+ start=2357562 end=2360182 cdsStart=2357562 cdsEnd=2360182 sfCount=4 sfStarts=2357562,2358427,2359568,2359915, sfEnds=2358313,2358532,2359773,2360182,	-	-	-
424337	86	19	19.07	6.35	-1.58648	Down	2.04e-06	2.31e-05	jgi|Poptr1_1|424337|gw1.III.739.1|CDS chrom=LG_III strand=+ start=12754376 end=12756148 cdsStart=12754376 cdsEnd=12756148 sfCount=1 sfStarts=12754376, sfEnds=12756148,	-	-	-
826242	63	14	13.97	4.68	-1.57775	Down	5.55e-05	0.000448024	jgi|Poptr1_1|826242|estExt_fgenesh4_pg.C_LG_XIX0724|CDS chrom=LG_XIX strand=- start=9146717 end=9159508 cdsStart=9146945 cdsEnd=9159508 sfCount=17 sfStarts=9146717,9147341,9147932,9148907,9149209,9150178,9150386,9151573,9151796,9152813,9152983,9153038,9155726,9156741,9158632,9158888,9159377, sfEnds=9147193,9147449,9148123,9149119,9149328,9150299,9150770,9151707,9151929,9152903,9152986,9153225,915…	-	-	-
1108928	306	68	67.86	22.74	-1.57733	Down	2.11e-19	1.04e-17	jgi|Poptr1_1|1108928|estExt_Genewise1Plus.C_280149|CDS chrom=scaffold_28 strand=- start=526319 end=528825 cdsStart=526665 cdsEnd=528825 sfCount=2 sfStarts=526319,527502, sfEnds=527233,528825,	-	-	-
765157	108	24	23.95	8.03	-1.57655	Down	1.06e-07	1.5e-06	jgi|Poptr1_1|765157|fgenesh4_pg.C_LG_VIII000171|CDS chrom=LG_VIII strand=- start=922725 end=932581 cdsStart=922725 cdsEnd=932581 sfCount=15 sfStarts=922725,923638,924843,925042,925324,925986,927515,927684,927852,928762,928978,929934,930648,931643,932160, sfEnds=923368,923854,924900,925109,925395,926651,927577,927772,927914,928856,929754,930101,930922,931886,932581,	-	-	-
800443	139	31	30.83	10.37	-1.57192	Down	1.63e-09	3e-08	jgi|Poptr1_1|800443|fgenesh4_pm.C_LG_IV000130|CDS chrom=LG_IV strand=+ start=3581675 end=3602535 cdsStart=3581675 cdsEnd=3602535 sfCount=2 sfStarts=3581675,3602499, sfEnds=3583011,3602535,	-	GO:0004672//protein kinase activity;GO:0005524//ATP binding;GO:0004713//protein tyrosine kinase activity;GO:0004674//protein serine/threonine kinase activity;GO:0004675//transmembrane receptor protein serine/threonine kinase activity;GO:0004676//3-phosphoinositide-dependent protein kinase activity;GO:0004677//DNA-dependent protein kinase activity;GO:0004679//AMP-activated protein kinase activity;…	GO:0006468//protein amino acid phosphorylation;GO:0007165//signal transduction
718074	103	23	22.84	7.69	-1.57051	Down	2.31e-07	3.09e-06	jgi|Poptr1_1|718074|estExt_Genewise1_v1.C_LG_VII0238|CDS chrom=LG_VII strand=+ start=12696667 end=12704790 cdsStart=12696673 cdsEnd=12704551 sfCount=11 sfStarts=12696667,12697408,12697809,12698711,12699319,12700363,12701299,12702190,12702429,12704066,12704464, sfEnds=12696835,12697694,12698003,12699057,12699610,12700521,12701664,12702255,12702477,12704189,12704790,	-	GO:0003824//catalytic activity;GO:0008236//serine-type peptidase activity;GO:0004287;GO:0004252//serine-type endopeptidase activity;GO:0008945	GO:0006508//proteolysis
862199	85	19	18.85	6.35	-1.56974	Down	2.8e-06	3.07e-05	jgi|Poptr1_1|862199|e_gw1.V.526.1|CDS chrom=LG_V strand=- start=13590698 end=13593364 cdsStart=13590698 cdsEnd=13593364 sfCount=3 sfStarts=13590698,13592686,13593121, sfEnds=13592533,13592780,13593364,	-	-	-
738251	201	45	44.58	15.05	-1.56663	Down	4.14e-13	1.2e-11	jgi|Poptr1_1|738251|estExt_Genewise1_v1.C_LG_XIX0571|CDS chrom=LG_XIX strand=+ start=2419085 end=2422957 cdsStart=2419322 cdsEnd=2422567 sfCount=2 sfStarts=2419085,2422166, sfEnds=2420671,2422957,	-	-	-
256910	76	17	16.85	5.69	-1.56625	Down	9.8e-06	9.47e-05	jgi|Poptr1_1|256910|gw1.XVI.2849.1|CDS chrom=LG_XVI strand=+ start=7213077 end=7216160 cdsStart=7213077 cdsEnd=7216160 sfCount=4 sfStarts=7213077,7213726,7213990,7215786, sfEnds=7213135,7213795,7215216,7216160,	-	GO:0005515//protein binding;GO:0004871//signal transducer activity	GO:0009416//response to light stimulus
830453	620	139	137.5	46.49	-1.56444	Down	2.41e-37	2.36e-35	jgi|Poptr1_1|830453|estExt_fgenesh4_pm.C_LG_II0883|CDS chrom=LG_II strand=+ start=15889481 end=15892749 cdsStart=15889481 cdsEnd=15892749 sfCount=8 sfStarts=15889481,15890604,15890736,15890941,15891379,15891670,15892171,15892610, sfEnds=15889870,15890693,15890880,15891104,15891438,15892086,15892558,15892749,	-	GO:0004806//triacylglycerol lipase activity	GO:0006629//lipid metabolic process
569227	553	124	122.64	41.47	-1.56429	Down	1.79e-33	1.52e-31	jgi|Poptr1_1|569227|eugene3.00111241|CDS chrom=LG_XI strand=- start=13972768 end=13975186 cdsStart=13972768 cdsEnd=13975186 sfCount=5 sfStarts=13972768,13973093,13973674,13974152,13974515, sfEnds=13972996,13973560,13973971,13974362,13975186,	-	GO:0008168//methyltransferase activity;GO:0005554	-
200694	58	13	12.86	4.35	-1.5638	Down	0.000122934	0.000912843	jgi|Poptr1_1|200694|gw1.IX.1159.1|CDS chrom=LG_IX strand=+ start=2040018 end=2043380 cdsStart=2040018 cdsEnd=2043380 sfCount=6 sfStarts=2040018,2041162,2041590,2041927,2042579,2043185, sfEnds=2040350,2041485,2041733,2042051,2042674,2043380,	-	GO:0004147//dihydrolipoamide branched chain acyltransferase activity;GO:0004405;GO:0004406//H3/H4 histone acetyltransferase activity;GO:0008080//N-acetyltransferase activity;GO:0008374//O-acyltransferase activity;GO:0008415//acyltransferase activity;GO:0008951;GO:0016406;GO:0016407//acetyltransferase activity;GO:0016408;GO:0016409//palmitoyltransferase activity;GO:0016410//N-acyltransferase activ…	-
876817	58	13	12.86	4.35	-1.5638	Down	0.000122934	0.000912281	jgi|Poptr1_1|876817|e_gw1.IX.1131.1|CDS chrom=LG_IX strand=- start=1994233 end=1999585 cdsStart=1994233 cdsEnd=1999585 sfCount=8 sfStarts=1994233,1994903,1995354,1995584,1995953,1996156,1997050,1997636, sfEnds=1994484,1995211,1995493,1995653,1996113,1996370,1997192,1999585,	-	-	-
799999	80	18	17.74	6.02	-1.55917	Down	6.13e-06	6.21e-05	jgi|Poptr1_1|799999|fgenesh4_pm.C_LG_III000464|CDS chrom=LG_III strand=+ start=12829811 end=12834183 cdsStart=12829811 cdsEnd=12834183 sfCount=7 sfStarts=12829811,12829986,12831077,12832030,12832989,12833444,12833794, sfEnds=12829898,12830216,12831174,12832216,12833119,12833680,12834183,	GO:0016020//membrane	GO:0005279	GO:0006865//amino acid transport
758136	142	32	31.49	10.7	-1.55728	Down	1.41e-09	2.61e-08	jgi|Poptr1_1|758136|fgenesh4_pg.C_LG_III001678|CDS chrom=LG_III strand=+ start=17286680 end=17292988 cdsStart=17286680 cdsEnd=17292988 sfCount=10 sfStarts=17286680,17289212,17289875,17290050,17290811,17291731,17291936,17292396,17292538,17292861, sfEnds=17288738,17289297,17289961,17290700,17290975,17291862,17292241,17292459,17292777,17292988,	GO:0016021//integral to membrane	GO:0005524//ATP binding;GO:0042626//ATPase activity, coupled to transmembrane movement of substances;GO:0016887//ATPase activity;GO:0000166//nucleotide binding;GO:0017111//nucleoside-triphosphatase activity	GO:0006810//transport
557279	155	35	34.37	11.71	-1.55341	Down	2.6e-10	5.27e-09	jgi|Poptr1_1|557279|eugene3.00090539|CDS chrom=LG_IX strand=+ start=3270449 end=3285389 cdsStart=3270449 cdsEnd=3285389 sfCount=26 sfStarts=3270449,3271998,3272445,3272946,3273285,3273543,3273788,3275316,3275711,3276401,3276674,3277169,3277811,3278402,3279114,3279709,3279958,3281381,3282152,3282323,3283156,3283415,3283935,3284423,3284869,3285131, sfEnds=3271435,3272339,3272582,3273116,3273443,327…	-	GO:0016773//phosphotransferase activity, alcohol group as acceptor;GO:0004428//inositol or phosphatidylinositol kinase activity;GO:0004430//1-phosphatidylinositol 4-kinase activity	-
202304	84	19	18.63	6.35	-1.5528	Down	3.83e-06	4.1e-05	jgi|Poptr1_1|202304|gw1.IX.2769.1|CDS chrom=LG_IX strand=- start=5182619 end=5193972 cdsStart=5182619 cdsEnd=5193972 sfCount=15 sfStarts=5193914,5193130,5191759,5190737,5190506,5188470,5188169,5188025,5187161,5186795,5186489,5183626,5183403,5182781,5182619, sfEnds=5193972,5193261,5191860,5190841,5190581,5188544,5188271,5188095,5187230,5186871,5186602,5183745,5183531,5182859,5182710,	GO:0016021//integral to membrane	GO:0005215//transporter activity	GO:0006810//transport
817289	349	79	77.4	26.42	-1.5507	Down	1.97e-21	1.06e-19	jgi|Poptr1_1|817289|estExt_fgenesh4_pg.C_LG_III0902|CDS chrom=LG_III strand=+ start=10843259 end=10848305 cdsStart=10843368 cdsEnd=10848014 sfCount=7 sfStarts=10843259,10845183,10846016,10847029,10847275,10847618,10847814, sfEnds=10843803,10845191,10846872,10847190,10847510,10847705,10848305,	-	GO:0004553//hydrolase activity, hydrolyzing O-glycosyl compounds;GO:0004564//beta-fructofuranosidase activity	GO:0005975//carbohydrate metabolic process
735925	150	34	33.27	11.37	-1.54899	Down	5.61e-10	1.1e-08	jgi|Poptr1_1|735925|estExt_Genewise1_v1.C_LG_XVI3831|CDS chrom=LG_XVI strand=- start=11692274 end=11693937 cdsStart=11692276 cdsEnd=11693772 sfCount=1 sfStarts=11692274, sfEnds=11693937,	-	GO:0005515//protein binding	-
571179	344	78	76.29	26.09	-1.548	Down	4.21e-21	2.26e-19	jgi|Poptr1_1|571179|eugene3.00130543|CDS chrom=LG_XIII strand=+ start=4037024 end=4044367 cdsStart=4037024 cdsEnd=4044367 sfCount=10 sfStarts=4037024,4038321,4038603,4039005,4039405,4039837,4040147,4041410,4043235,4044143, sfEnds=4037299,4038498,4038831,4039144,4039691,4040049,4040638,4042069,4043762,4044367,	-	-	-
673686	75	17	16.63	5.69	-1.54729	Down	1.34e-05	0.000125271	jgi|Poptr1_1|673686|grail3.0168000601|CDS chrom=scaffold_168 strand=+ start=147876 end=150511 cdsStart=147876 cdsEnd=149864 sfCount=3 sfStarts=147876,149944,150117, sfEnds=149864,150000,150511,	-	GO:0003677//DNA binding;GO:0046983//protein dimerization activity	-
427924	66	15	14.64	5.02	-1.54416	Down	4.74e-05	0.000386619	jgi|Poptr1_1|427924|gw1.VI.1596.1|CDS chrom=LG_VI strand=- start=4055261 end=4058114 cdsStart=4055261 cdsEnd=4058114 sfCount=6 sfStarts=4058058,4057816,4056520,4056358,4056081,4055261, sfEnds=4058114,4057942,4056771,4056403,4056156,4055496,	-	-	-
767269	66	15	14.64	5.02	-1.54416	Down	4.74e-05	0.000386357	jgi|Poptr1_1|767269|fgenesh4_pg.C_LG_IX000320|CDS chrom=LG_IX strand=- start=2021721 end=2023099 cdsStart=2021721 cdsEnd=2023099 sfCount=4 sfStarts=2021721,2022230,2022319,2022800, sfEnds=2021859,2022278,2022706,2023099,	-	GO:0008483//transaminase activity	GO:0008152//metabolic process
572550	66	15	14.64	5.02	-1.54416	Down	4.74e-05	0.000386096	jgi|Poptr1_1|572550|eugene3.00140595|CDS chrom=LG_XIV strand=+ start=4872768 end=4877436 cdsStart=4872768 cdsEnd=4877144 sfCount=7 sfStarts=4872768,4873901,4874502,4874801,4874976,4875246,4875582, sfEnds=4872935,4874197,4874710,4874849,4875065,4875308,4877436,	GO:0000151//ubiquitin ligase complex;GO:0005634//nucleus	GO:0004842//ubiquitin-protein ligase activity;GO:0008270//zinc ion binding;GO:0003676//nucleic acid binding	GO:0016567//protein ubiquitination
433599	277	63	61.43	21.07	-1.54375	Down	3.29e-17	1.42e-15	jgi|Poptr1_1|433599|gw1.XII.1358.1|CDS chrom=LG_XII strand=- start=10501233 end=10503706 cdsStart=10501233 cdsEnd=10503706 sfCount=6 sfStarts=10503175,10502924,10502492,10502043,10501667,10501233, sfEnds=10503706,10503031,10502830,10502277,10501811,10501469,	-	-	-
782650	202	46	44.8	15.38	-1.54244	Down	6.62e-13	1.86e-11	jgi|Poptr1_1|782650|fgenesh4_pg.C_scaffold_66000265|CDS chrom=scaffold_66 strand=+ start=1976946 end=1981425 cdsStart=1976946 cdsEnd=1981425 sfCount=7 sfStarts=1976946,1977823,1978818,1979103,1979626,1980588,1981045, sfEnds=1977107,1978139,1978899,1979528,1980363,1980698,1981425,	-	-	-
803906	79	18	17.52	6.02	-1.54117	Down	8.38e-06	8.24e-05	jgi|Poptr1_1|803906|fgenesh4_pm.C_LG_VIII000861|CDS chrom=LG_VIII strand=- start=14050046 end=14053563 cdsStart=14050046 cdsEnd=14053563 sfCount=6 sfStarts=14050046,14050447,14051260,14051517,14052324,14053377, sfEnds=14050344,14050690,14051434,14051628,14052560,14053563,	GO:0016020//membrane	-	-
1068226	79	18	17.52	6.02	-1.54117	Down	8.38e-06	8.24e-05	jgi|Poptr1_1|1068226|estExt_Genewise1Plus.C_LG_I5036|CDS chrom=LG_I strand=+ start=18120448 end=18124791 cdsStart=18120448 cdsEnd=18124791 sfCount=11 sfStarts=18120448,18120637,18120829,18121056,18121927,18122917,18123412,18124110,18124339,18124526,18124666, sfEnds=18120555,18120750,18120921,18121121,18122025,18122996,18123524,18124198,18124425,18124594,18124791,	-	-	-
575197	92	21	20.4	7.02	-1.53903	Down	1.5e-06	1.75e-05	jgi|Poptr1_1|575197|eugene3.00150592|CDS chrom=LG_XV strand=- start=6012043 end=6019923 cdsStart=6012340 cdsEnd=6019923 sfCount=10 sfStarts=6012043,6012260,6014704,6015047,6016522,6017108,6018718,6019260,6019400,6019892, sfEnds=6012182,6014604,6014962,6016358,6016599,6017210,6019093,6019304,6019483,6019923,	-	GO:0004308//exo-alpha-sialidase activity	-
802390	92	21	20.4	7.02	-1.53903	Down	1.5e-06	1.74e-05	jgi|Poptr1_1|802390|fgenesh4_pm.C_LG_VI000737|CDS chrom=LG_VI strand=+ start=16230043 end=16236017 cdsStart=16230043 cdsEnd=16236017 sfCount=12 sfStarts=16230043,16230325,16230586,16230959,16231467,16231670,16232799,16234033,16234325,16234503,16234835,16235757, sfEnds=16230143,16230452,16230648,16231080,16231582,16232477,16233530,16234254,16234420,16234697,16234948,16236017,	-	-	GO:0006118//electron transport
906521	210	48	46.57	16.05	-1.53683	Down	2.65e-13	7.94e-12	jgi|Poptr1_1|906521|e_gw1.XVI.562.1|CDS chrom=LG_XVI strand=- start=13629245 end=13636072 cdsStart=13629245 cdsEnd=13636072 sfCount=5 sfStarts=13629245,13629951,13630583,13632749,13635670, sfEnds=13629523,13630496,13630940,13633025,13636072,	-	-	-
714540	70	16	15.52	5.35	-1.53652	Down	2.95e-05	0.000253517	jgi|Poptr1_1|714540|estExt_Genewise1_v1.C_LG_IV4506|CDS chrom=LG_IV strand=+ start=11430075 end=11434130 cdsStart=11430220 cdsEnd=11433828 sfCount=10 sfStarts=11430075,11430339,11430704,11430890,11431392,11432044,11432804,11433084,11433292,11433640, sfEnds=11430244,11430611,11430772,11430961,11431465,11432706,11432929,11433188,11433366,11434130,	-	GO:0005515//protein binding;GO:0005524//ATP binding	GO:0044267//cellular protein metabolic process
557797	83	19	18.41	6.35	-1.53566	Down	5.23e-06	5.42e-05	jgi|Poptr1_1|557797|eugene3.00091057|CDS chrom=LG_IX strand=- start=6783895 end=6790532 cdsStart=6783895 cdsEnd=6790532 sfCount=19 sfStarts=6783895,6784739,6784967,6785130,6785441,6785952,6786084,6786344,6786811,6787050,6787489,6787773,6787973,6788173,6788467,6788763,6789112,6789270,6789978, sfEnds=6784475,6784847,6785040,6785322,6785851,6786001,6786270,6786719,6786944,6787391,6787653,6787883,678…	GO:0005634//nucleus	GO:0003677//DNA binding;GO:0003918//DNA topoisomerase (ATP-hydrolyzing) activity;GO:0005524//ATP binding	GO:0006259//DNA metabolic process;GO:0006265//DNA topological change
559189	236	54	52.34	18.06	-1.53512	Down	9.23e-15	3.27e-13	jgi|Poptr1_1|559189|eugene3.00050804|CDS chrom=LG_V strand=- start=10989599 end=10993823 cdsStart=10989617 cdsEnd=10992107 sfCount=7 sfStarts=10989599,10990071,10990367,10990857,10991061,10991964,10993591, sfEnds=10989784,10990184,10990597,10990997,10991228,10992119,10993823,	-	-	GO:0008202//steroid metabolic process
432342	310	71	68.75	23.75	-1.53343	Down	6.35e-19	3.05e-17	jgi|Poptr1_1|432342|gw1.XII.101.1|CDS chrom=LG_XII strand=- start=5202143 end=5209562 cdsStart=5202143 cdsEnd=5209562 sfCount=11 sfStarts=5209182,5207199,5206775,5206029,5205670,5205476,5204272,5203563,5203356,5202891,5202143, sfEnds=5209562,5208550,5206885,5206305,5205758,5205584,5204481,5203688,5203454,5203082,5202745,	-	-	-
1094790	61	14	13.53	4.68	-1.53158	Down	0.000104561	0.000787571	jgi|Poptr1_1|1094790|estExt_Genewise1Plus.C_LG_XI3739|CDS chrom=LG_XI strand=+ start=14266873 end=14269510 cdsStart=14266873 cdsEnd=14269229 sfCount=6 sfStarts=14266873,14267343,14267687,14267959,14268594,14268790, sfEnds=14267123,14267505,14267863,14268042,14268675,14269510,	-	-	-
568834	61	14	13.53	4.68	-1.53158	Down	0.000104561	0.000787079	jgi|Poptr1_1|568834|eugene3.00110848|CDS chrom=LG_XI strand=+ start=10887524 end=10892738 cdsStart=10887524 cdsEnd=10892738 sfCount=9 sfStarts=10887524,10887801,10888344,10888541,10890676,10890872,10892081,10892481,10892731, sfEnds=10887716,10888269,10888419,10888633,10890762,10891653,10892209,10892617,10892738,	-	GO:0004197//cysteine-type endopeptidase activity;GO:0004221//ubiquitin thiolesterase activity	GO:0006511//ubiquitin-dependent protein catabolic process
552616	444	102	98.47	34.11	-1.52949	Down	2.31e-26	1.53e-24	jgi|Poptr1_1|552616|eugene3.00021931|CDS chrom=LG_II strand=+ start=16994883 end=16998666 cdsStart=16994883 cdsEnd=16998666 sfCount=5 sfStarts=16994883,16995608,16998148,16998370,16998538, sfEnds=16995359,16997428,16998264,16998441,16998666,	GO:0030127//COPII vesicle coat	GO:0005515//protein binding;GO:0003779//actin binding	GO:0006886//intracellular protein transport;GO:0006888//ER to Golgi vesicle-mediated transport
1116276	148	34	32.82	11.37	-1.52934	Down	1.04e-09	1.96e-08	jgi|Poptr1_1|1116276|estExt_Genewise1Plus.C_1420040|CDS chrom=scaffold_142 strand=+ start=119852 end=127499 cdsStart=119852 cdsEnd=124460 sfCount=3 sfStarts=119852,121783,127093, sfEnds=121667,124477,127499,	-	-	-
668972	78	18	17.3	6.02	-1.52294	Down	1.14e-05	0.000108408	jgi|Poptr1_1|668972|grail3.0007019501|CDS chrom=LG_XVIII strand=+ start=4951160 end=4953528 cdsStart=4951447 cdsEnd=4953528 sfCount=3 sfStarts=4951160,4952205,4953076, sfEnds=4951611,4952399,4953528,	-	GO:0031072//heat shock protein binding;GO:0051082//unfolded protein binding	GO:0006457//protein folding
218778	273	63	60.54	21.07	-1.5227	Down	1.12e-16	4.7e-15	jgi|Poptr1_1|218778|gw1.VII.3083.1|CDS chrom=LG_VII strand=- start=9473088 end=9475432 cdsStart=9473088 cdsEnd=9475432 sfCount=8 sfStarts=9475368,9475202,9474859,9474562,9474353,9473748,9473547,9473088, sfEnds=9475432,9475289,9474921,9474725,9474428,9473807,9473672,9473240,	-	GO:0004672//protein kinase activity;GO:0005524//ATP binding;GO:0004713//protein tyrosine kinase activity;GO:0004674//protein serine/threonine kinase activity	GO:0006468//protein amino acid phosphorylation
877036	394	91	87.38	30.43	-1.52181	Down	2.11e-23	1.24e-21	jgi|Poptr1_1|877036|e_gw1.IX.2017.1|CDS chrom=LG_IX strand=+ start=3574674 end=3578149 cdsStart=3574674 cdsEnd=3578149 sfCount=2 sfStarts=3574674,3577209, sfEnds=3575868,3578149,	-	-	-
829704	315	73	69.86	24.41	-1.51699	Down	6.35e-19	3.04e-17	jgi|Poptr1_1|829704|estExt_fgenesh4_pm.C_LG_I0802|CDS chrom=LG_I strand=+ start=20378220 end=20395736 cdsStart=20378220 cdsEnd=20395363 sfCount=31 sfStarts=20378220,20378363,20378734,20378941,20379103,20380485,20380686,20380994,20381165,20381483,20382057,20382280,20382834,20383098,20383344,20383543,20383715,20383938,20384080,20384258,20384469,20384870,20385079,20385447,20392995,20393600,20393853,…	GO:0030125//clathrin vesicle coat	-	-
1072747	99	23	21.96	7.69	-1.51382	Down	8e-07	9.83e-06	jgi|Poptr1_1|1072747|estExt_Genewise1Plus.C_LG_II3179|CDS chrom=LG_II strand=- start=18156881 end=18159101 cdsStart=18157149 cdsEnd=18159101 sfCount=1 sfStarts=18156881, sfEnds=18159101,	-	-	-
782672	5070	1178	1124.38	393.97	-1.51297	Down	3.78e-279	1.09e-276	jgi|Poptr1_1|782672|fgenesh4_pg.C_scaffold_70000020|CDS chrom=scaffold_70 strand=- start=125105 end=140068 cdsStart=125105 cdsEnd=140068 sfCount=42 sfStarts=125105,125566,125846,126345,128149,128512,129089,129273,129475,129676,129895,130881,131028,131266,131942,132191,132408,132620,133173,133411,133622,133756,134457,134655,134790,134960,135109,135311,136232,136479,136646,136823,136986,137317,1375…	GO:0000148//1,3-beta-glucan synthase complex;GO:0016020//membrane	GO:0003843//1,3-beta-glucan synthase activity	GO:0006075//1,3-beta-glucan biosynthetic process
787659	232	54	51.45	18.06	-1.51037	Down	3.12e-14	1.06e-12	jgi|Poptr1_1|787659|fgenesh4_pg.C_scaffold_220000011|CDS chrom=scaffold_220 strand=- start=102587 end=109050 cdsStart=102587 cdsEnd=109050 sfCount=7 sfStarts=102587,102984,103596,103868,104108,106134,108877, sfEnds=102901,103282,103767,104026,106050,106188,109050,	GO:0016020//membrane	GO:0005524//ATP binding;GO:0015662//ATPase activity, coupled to transmembrane movement of ions, phosphorylative mechanism;GO:0003824//catalytic activity;GO:0005388//calcium-transporting ATPase activity;GO:0005509//calcium ion binding;GO:0015085//calcium ion transmembrane transporter activity;GO:0016820//hydrolase activity, acting on acid anhydrides, catalyzing transmembrane movement of substances	GO:0015992//proton transport;GO:0006812//cation transport;GO:0008152//metabolic process;GO:0006816//calcium ion transport
549110	73	17	16.19	5.69	-1.5086	Down	2.51e-05	0.000220352	jgi|Poptr1_1|549110|eugene3.00011551|CDS chrom=LG_I strand=+ start=17121298 end=17123342 cdsStart=17121435 cdsEnd=17123141 sfCount=3 sfStarts=17121298,17121928,17122456, sfEnds=17121828,17122197,17123342,	-	-	-
230624	137	32	30.38	10.7	-1.50551	Down	6.56e-09	1.12e-07	jgi|Poptr1_1|230624|gw1.X.5321.1|CDS chrom=LG_X strand=- start=7390926 end=7395305 cdsStart=7390926 cdsEnd=7395305 sfCount=8 sfStarts=7394977,7394549,7394089,7392643,7391886,7391702,7391567,7390926, sfEnds=7395305,7394582,7394319,7392732,7391951,7391793,7391614,7391031,	-	-	-
831004	81	19	17.96	6.35	-1.49996	Down	9.71e-06	9.39e-05	jgi|Poptr1_1|831004|estExt_fgenesh4_pm.C_LG_III0713|CDS chrom=LG_III strand=- start=18060962 end=18065958 cdsStart=18061775 cdsEnd=18065804 sfCount=9 sfStarts=18060962,18061759,18062535,18062739,18063134,18063636,18063877,18065197,18065712, sfEnds=18061291,18062004,18062634,18062841,18063274,18063796,18063933,18065271,18065958,	-	GO:0004034//aldose 1-epimerase activity	GO:0006012//galactose metabolic process
836209	64	15	14.19	5.02	-1.49912	Down	8.85e-05	0.000681595	jgi|Poptr1_1|836209|estExt_fgenesh4_pm.C_280064|CDS chrom=scaffold_28 strand=+ start=1528209 end=1531808 cdsStart=1528257 cdsEnd=1528925 sfCount=2 sfStarts=1528209,1531381, sfEnds=1528929,1531808,	-	-	-
772547	196	46	43.47	15.38	-1.49896	Down	4.12e-12	1.01e-10	jgi|Poptr1_1|772547|fgenesh4_pg.C_LG_XII000322|CDS chrom=LG_XII strand=+ start=3029207 end=3032571 cdsStart=3029207 cdsEnd=3032571 sfCount=9 sfStarts=3029207,3029571,3030218,3030541,3030737,3030957,3031615,3031834,3032341, sfEnds=3029473,3029676,3030438,3030617,3030845,3031082,3031725,3031941,3032571,	-	GO:0005509//calcium ion binding	-
799301	166	39	36.81	13.04	-1.49715	Down	1.9e-10	3.92e-09	jgi|Poptr1_1|799301|fgenesh4_pm.C_LG_II000990|CDS chrom=LG_II strand=- start=18500769 end=18505023 cdsStart=18500769 cdsEnd=18505023 sfCount=7 sfStarts=18500769,18501329,18501556,18501755,18501932,18502914,18504532, sfEnds=18500906,18501430,18501633,18501848,18502110,18503030,18505023,	-	-	-
801931	221	52	49.01	17.39	-1.49482	Down	1.93e-13	5.88e-12	jgi|Poptr1_1|801931|fgenesh4_pm.C_LG_VI000278|CDS chrom=LG_VI strand=- start=5622945 end=5626930 cdsStart=5622945 cdsEnd=5626930 sfCount=7 sfStarts=5622945,5623822,5624029,5624300,5624712,5624960,5625347, sfEnds=5623705,5623915,5624108,5624351,5624869,5625050,5626930,	-	-	-
562645	85	20	18.85	6.69	-1.49449	Down	6.06e-06	6.15e-05	jgi|Poptr1_1|562645|eugene3.00070583|CDS chrom=LG_VII strand=- start=4407784 end=4413142 cdsStart=4407784 cdsEnd=4413142 sfCount=11 sfStarts=4407784,4408146,4408578,4408939,4410238,4410446,4410704,4410887,4411118,4411763,4413132, sfEnds=4408020,4408247,4408781,4409016,4410357,4410538,4410781,4411039,4411222,4412453,4413142,	-	-	-
583200	170	40	37.7	13.38	-1.49449	Down	1.2e-10	2.52e-09	jgi|Poptr1_1|583200|eugene3.01470085|CDS chrom=scaffold_147 strand=- start=572406 end=577051 cdsStart=572406 cdsEnd=577039 sfCount=12 sfStarts=572406,572809,573355,574021,574243,574816,575471,575646,576068,576461,576739,576989, sfEnds=572723,572982,573440,574140,574273,574891,575558,575707,576144,576563,576800,577051,	-	GO:0003676//nucleic acid binding	-
725225	225	53	49.9	17.73	-1.49285	Down	1.22e-13	3.85e-12	jgi|Poptr1_1|725225|estExt_Genewise1_v1.C_LG_X3050|CDS chrom=LG_X strand=+ start=20070674 end=20074725 cdsStart=20070740 cdsEnd=20074402 sfCount=12 sfStarts=20070674,20070926,20071149,20071429,20071867,20072319,20072626,20073211,20073464,20073701,20073938,20074303, sfEnds=20070780,20071073,20071281,20071601,20071972,20072417,20073116,20073375,20073619,20073812,20074124,20074725,	GO:0016020//membrane	GO:0004427//inorganic diphosphatase activity;GO:0009678//hydrogen-translocating pyrophosphatase activity	GO:0015992//proton transport
731397	190	45	42.14	15.05	-1.48543	Down	1.19e-11	2.76e-10	jgi|Poptr1_1|731397|estExt_Genewise1_v1.C_LG_XIV1811|CDS chrom=LG_XIV strand=+ start=3757154 end=3762182 cdsStart=3757154 cdsEnd=3761715 sfCount=7 sfStarts=3757154,3758709,3759571,3759930,3760558,3760740,3761152, sfEnds=3758603,3758830,3759849,3760313,3760667,3760968,3762182,	GO:0016020//membrane;GO:0016021//integral to membrane	GO:0005524//ATP binding;GO:0015662//ATPase activity, coupled to transmembrane movement of ions, phosphorylative mechanism;GO:0005388//calcium-transporting ATPase activity;GO:0003824//catalytic activity;GO:0016820//hydrolase activity, acting on acid anhydrides, catalyzing transmembrane movement of substances	GO:0006812//cation transport;GO:0006816//calcium ion transport;GO:0008152//metabolic process
785446	152	36	33.71	12.04	-1.48534	Down	1.39e-09	2.58e-08	jgi|Poptr1_1|785446|fgenesh4_pg.C_scaffold_147000033|CDS chrom=scaffold_147 strand=- start=249457 end=250749 cdsStart=249457 cdsEnd=250749 sfCount=1 sfStarts=249457, sfEnds=250749,	-	-	-
744904	114	27	25.28	9.03	-1.4852	Down	1.67e-07	2.28e-06	jgi|Poptr1_1|744904|estExt_Genewise1_v1.C_1400168|CDS chrom=scaffold_140 strand=+ start=349747 end=356925 cdsStart=349747 cdsEnd=356503 sfCount=15 sfStarts=349747,350841,351079,351508,352708,353236,353987,354346,354546,354999,355546,355749,356129,356318,356758, sfEnds=349900,350932,351148,351626,352804,353315,354181,354429,354606,355059,355639,355821,356211,356647,356925,	-	GO:0004849//uridine kinase activity	-
807629	97	23	21.51	7.69	-1.48395	Down	1.47e-06	1.72e-05	jgi|Poptr1_1|807629|fgenesh4_pm.C_LG_XIV000439|CDS chrom=LG_XIV strand=- start=8223588 end=8230162 cdsStart=8223588 cdsEnd=8230162 sfCount=12 sfStarts=8223588,8225993,8226328,8226755,8227811,8228158,8228502,8228813,8229113,8229523,8229715,8229914, sfEnds=8223779,8226103,8226467,8226758,8228043,8228302,8228744,8229018,8229187,8229640,8229816,8230162,	-	-	-
725133	177	42	39.25	14.05	-1.48212	Down	6.42e-11	1.39e-09	jgi|Poptr1_1|725133|estExt_Genewise1_v1.C_LG_X2913|CDS chrom=LG_X strand=+ start=19639595 end=19645064 cdsStart=19640100 cdsEnd=19644806 sfCount=7 sfStarts=19639595,19641166,19642690,19643407,19644210,19644470,19644689, sfEnds=19640717,19641284,19643316,19643719,19644381,19644572,19645064,	GO:0000151//ubiquitin ligase complex	GO:0004842//ubiquitin-protein ligase activity;GO:0008270//zinc ion binding	GO:0016567//protein ubiquitination
798347	181	43	40.14	14.38	-1.48098	Down	4.04e-11	8.84e-10	jgi|Poptr1_1|798347|fgenesh4_pm.C_LG_II000036|CDS chrom=LG_II strand=- start=461338 end=468413 cdsStart=461338 cdsEnd=468413 sfCount=17 sfStarts=461338,462338,462531,462984,463507,463693,464411,464598,465264,465817,466033,466677,467109,467305,467556,467821,468279, sfEnds=461751,462422,462819,463052,463621,463764,464509,464669,465338,465938,466245,466997,467241,467519,467712,468036,468413,	-	GO:0005509//calcium ion binding;GO:0004535//poly(A)-specific ribonuclease activity	-
768411	1132	269	251.04	89.97	-1.4804	Down	7.87e-62	1.23e-59	jgi|Poptr1_1|768411|fgenesh4_pg.C_LG_IX001462|CDS chrom=LG_IX strand=+ start=11143800 end=11148001 cdsStart=11143800 cdsEnd=11148001 sfCount=8 sfStarts=11143800,11144530,11144705,11145451,11145712,11146237,11147213,11147621, sfEnds=11143958,11144662,11144861,11145532,11146137,11146974,11147326,11148001,	-	-	-
1081155	500	119	110.89	39.8	-1.47829	Down	3.74e-28	2.65e-26	jgi|Poptr1_1|1081155|estExt_Genewise1Plus.C_LG_VI1960|CDS chrom=LG_VI strand=+ start=12897658 end=12904558 cdsStart=12897658 cdsEnd=12904211 sfCount=10 sfStarts=12897658,12897934,12898167,12898345,12898608,12900276,12900427,12901639,12902294,12903691, sfEnds=12897852,12897993,12898238,12898520,12898768,12900334,12900473,12901779,12902385,12904558,	-	-	-
879734	84	20	18.63	6.69	-1.47755	Down	8.22e-06	8.11e-05	jgi|Poptr1_1|879734|e_gw1.IX.874.1|CDS chrom=LG_IX strand=+ start=1569415 end=1573468 cdsStart=1569415 cdsEnd=1573468 sfCount=9 sfStarts=1569415,1569941,1570391,1570607,1570793,1571760,1572139,1572331,1573027, sfEnds=1569606,1570022,1570467,1570695,1570976,1571941,1572241,1572662,1573468,	-	-	-
716668	147	35	32.6	11.71	-1.47713	Down	2.99e-09	5.32e-08	jgi|Poptr1_1|716668|estExt_Genewise1_v1.C_LG_V5276|CDS chrom=LG_V strand=+ start=11564721 end=11568406 cdsStart=11564764 cdsEnd=11568406 sfCount=9 sfStarts=11564721,11565426,11565753,11566086,11566581,11566835,11567142,11567802,11568251, sfEnds=11564841,11565662,11565857,11566361,11566728,11567019,11567254,11568096,11568406,	-	-	-
245912	88	21	19.52	7.02	-1.47541	Down	5.12e-06	5.34e-05	jgi|Poptr1_1|245912|gw1.XIV.2655.1|CDS chrom=LG_XIV strand=- start=6041155 end=6048252 cdsStart=6041155 cdsEnd=6048252 sfCount=17 sfStarts=6048165,6047974,6047195,6046848,6046555,6045981,6045553,6044839,6044222,6043326,6043107,6042864,6042740,6042508,6042281,6042021,6041155, sfEnds=6048252,6048122,6047842,6047091,6046696,6046164,6045721,6045140,6044293,6043412,6043229,6042974,6042778,6042629,6042…	-	GO:0000166//nucleotide binding;GO:0017111//nucleoside-triphosphatase activity;GO:0005524//ATP binding;GO:0004003//ATP-dependent DNA helicase activity;GO:0004004//ATP-dependent RNA helicase activity;GO:0008026//ATP-dependent helicase activity;GO:0008094//DNA-dependent ATPase activity;GO:0008186//RNA-dependent ATPase activity;GO:0015462//protein-transmembrane transporting ATPase activity;GO:0015616…	-
178089	130	31	28.83	10.37	-1.47515	Down	2.59e-08	3.96e-07	jgi|Poptr1_1|178089|gw1.I.6689.1|CDS chrom=LG_I strand=- start=772867 end=803982 cdsStart=772867 cdsEnd=803982 sfCount=51 sfStarts=803781,803086,802534,801556,800797,800593,799624,796605,796384,795867,794792,793880,793173,792773,792485,792194,791949,791622,791218,791058,790464,789287,788924,788068,787357,787065,786859,785669,785493,785243,785047,783635,782622,782371,782024,781401,778979,778811,77…	GO:0000148//1,3-beta-glucan synthase complex;GO:0016020//membrane	GO:0003843//1,3-beta-glucan synthase activity	GO:0006075//1,3-beta-glucan biosynthetic process
836253	150	36	33.27	12.04	-1.46639	Down	2.53e-09	4.57e-08	jgi|Poptr1_1|836253|estExt_fgenesh4_pm.C_280125|CDS chrom=scaffold_28 strand=+ start=2949402 end=2953098 cdsStart=2949652 cdsEnd=2952791 sfCount=12 sfStarts=2949402,2949897,2950660,2950975,2951121,2951287,2951432,2951598,2951770,2952229,2952454,2952709, sfEnds=2949810,2950056,2950860,2951036,2951169,2951342,2951518,2951648,2952009,2952322,2952594,2953098,	-	-	-
779849	100	24	22.18	8.03	-1.46579	Down	1.25e-06	1.48e-05	jgi|Poptr1_1|779849|fgenesh4_pg.C_LG_XVIII001217|CDS chrom=LG_XVIII strand=- start=13349513 end=13355062 cdsStart=13349513 cdsEnd=13355062 sfCount=10 sfStarts=13349513,13349734,13350199,13350408,13351390,13351871,13352161,13352346,13353535,13354709, sfEnds=13349641,13349772,13350321,13350467,13351470,13351961,13352232,13352446,13353633,13355062,	-	-	-
740944	129	31	28.61	10.37	-1.4641	Down	3.49e-08	5.23e-07	jgi|Poptr1_1|740944|estExt_Genewise1_v1.C_440243|CDS chrom=scaffold_44 strand=+ start=1182940 end=1191265 cdsStart=1183003 cdsEnd=1190886 sfCount=20 sfStarts=1182940,1183862,1184037,1184191,1184345,1184469,1184644,1184914,1185256,1185444,1186207,1187247,1187686,1188146,1188496,1188684,1189447,1190185,1190371,1190656, sfEnds=1183041,1183932,1184100,1184256,1184392,1184531,1184700,1185072,1185324,1…	-	-	-
834165	133	32	29.5	10.7	-1.4631	Down	2.19e-08	3.4e-07	jgi|Poptr1_1|834165|estExt_fgenesh4_pm.C_LG_XI0421|CDS chrom=LG_XI strand=- start=14359321 end=14367551 cdsStart=14359525 cdsEnd=14367551 sfCount=13 sfStarts=14359321,14359902,14360291,14361232,14361455,14362272,14362994,14363246,14364386,14364584,14365303,14366122,14367370, sfEnds=14359689,14360172,14360851,14361374,14361712,14362442,14363134,14363641,14364481,14364643,14365450,14366358,14367551,	-	GO:0004197//cysteine-type endopeptidase activity;GO:0004221//ubiquitin thiolesterase activity	GO:0006511//ubiquitin-dependent protein catabolic process;GO:0006512//ubiquitin cycle
260154	220	53	48.79	17.73	-1.46039	Down	5.43e-13	1.54e-11	jgi|Poptr1_1|260154|gw1.XVIII.695.1|CDS chrom=LG_XVIII strand=+ start=1020466 end=1023497 cdsStart=1020466 cdsEnd=1023497 sfCount=8 sfStarts=1020466,1020706,1020891,1021123,1021427,1021838,1022182,1022805, sfEnds=1020604,1020788,1021012,1021292,1021725,1021939,1022610,1023497,	-	GO:0004672//protein kinase activity;GO:0005524//ATP binding;GO:0004713//protein tyrosine kinase activity;GO:0004674//protein serine/threonine kinase activity	GO:0006468//protein amino acid phosphorylation;GO:0006950//response to stress
801829	207	50	45.91	16.72	-1.45723	Down	2.91e-12	7.29e-11	jgi|Poptr1_1|801829|fgenesh4_pm.C_LG_VI000176|CDS chrom=LG_VI strand=- start=3465217 end=3474799 cdsStart=3465217 cdsEnd=3474799 sfCount=22 sfStarts=3465217,3465643,3466194,3466420,3466739,3467077,3467968,3468505,3469141,3469207,3469287,3469435,3469711,3470054,3470511,3470920,3471703,3472124,3472372,3472851,3473590,3474653, sfEnds=3465306,3465837,3466316,3466557,3466870,3467204,3468043,3468654,34…	GO:0005634//nucleus	-	GO:0000074
923648	244	59	54.11	19.73	-1.4555	Down	3.44e-14	1.16e-12	jgi|Poptr1_1|923648|e_gw1.87.9.1|CDS chrom=scaffold_87 strand=- start=668461 end=672491 cdsStart=668461 cdsEnd=672491 sfCount=5 sfStarts=668461,669031,670483,670698,672237, sfEnds=668922,669254,670600,671087,672491,	-	-	-
728788	91	22	20.18	7.36	-1.45515	Down	4.32e-06	4.58e-05	jgi|Poptr1_1|728788|estExt_Genewise1_v1.C_LG_XII0904|CDS chrom=LG_XII strand=+ start=9005877 end=9009392 cdsStart=9006099 cdsEnd=9008906 sfCount=7 sfStarts=9005877,9007066,9007575,9007793,9008454,9008733,9009119, sfEnds=9006351,9007180,9007683,9007870,9008645,9009041,9009392,	GO:0005963;GO:0017023//myosin phosphatase complex	GO:0000158;GO:0004721//phosphoprotein phosphatase activity;GO:0004723//calcium-dependent protein serine/threonine phosphatase activity;GO:0004724//magnesium-dependent protein serine/threonine phosphatase activity;GO:0008420//CTD phosphatase activity;GO:0008597//calcium-dependent protein serine/threonine phosphatase regulator activity;GO:0015071;GO:0017018//myosin phosphatase activity;GO:0017020//…	-
251530	831	201	184.29	67.22	-1.45502	Down	1e-44	1.2e-42	jgi|Poptr1_1|251530|gw1.XV.966.1|CDS chrom=LG_XV strand=- start=3701726 end=3708858 cdsStart=3701726 cdsEnd=3708858 sfCount=11 sfStarts=3708745,3707229,3707027,3705682,3704583,3704198,3703938,3703767,3703373,3702918,3701726, sfEnds=3708858,3707637,3707154,3705741,3704732,3704353,3704075,3703840,3703474,3703167,3701788,	-	GO:0004672//protein kinase activity;GO:0005524//ATP binding;GO:0004713//protein tyrosine kinase activity;GO:0004674//protein serine/threonine kinase activity;GO:0004707//MAP kinase activity;GO:0004675//transmembrane receptor protein serine/threonine kinase activity;GO:0004676//3-phosphoinositide-dependent protein kinase activity;GO:0004677//DNA-dependent protein kinase activity;GO:0004679//AMP-ac…	GO:0006468//protein amino acid phosphorylation
803807	252	61	55.89	20.4	-1.45402	Down	1.37e-14	4.78e-13	jgi|Poptr1_1|803807|fgenesh4_pm.C_LG_VIII000762|CDS chrom=LG_VIII strand=- start=12070139 end=12072236 cdsStart=12070139 cdsEnd=12072236 sfCount=7 sfStarts=12070139,12070342,12070474,12070691,12070950,12071519,12072061, sfEnds=12070237,12070410,12070565,12070796,12071343,12071902,12072236,	GO:0016020//membrane	GO:0005279	GO:0006865//amino acid transport
642557	508	123	112.66	41.14	-1.45336	Down	6.42e-28	4.53e-26	jgi|Poptr1_1|642557|grail3.0051005401|CDS chrom=LG_I strand=+ start=34027075 end=34029517 cdsStart=34027152 cdsEnd=34029254 sfCount=5 sfStarts=34027075,34027680,34028068,34028458,34029023, sfEnds=34027532,34027890,34028365,34028925,34029517,	-	GO:0008168//methyltransferase activity;GO:0005554	-
757185	66	16	14.64	5.35	-1.4523	Down	0.000101189	0.000765523	jgi|Poptr1_1|757185|fgenesh4_pg.C_LG_III000727|CDS chrom=LG_III strand=- start=9336792 end=9338198 cdsStart=9336792 cdsEnd=9338198 sfCount=2 sfStarts=9336792,9338152, sfEnds=9337470,9338198,	GO:0000151//ubiquitin ligase complex	GO:0004842//ubiquitin-protein ligase activity;GO:0008270//zinc ion binding	GO:0016567//protein ubiquitination
652750	99	24	21.96	8.03	-1.45141	Down	1.68e-06	1.94e-05	jgi|Poptr1_1|652750|grail3.0024038102|CDS chrom=LG_VI strand=+ start=3614392 end=3618061 cdsStart=3615154 cdsEnd=3617843 sfCount=11 sfStarts=3614392,3615123,3615322,3615534,3615708,3616144,3616974,3617175,3617399,3617532,3617726, sfEnds=3614608,3615156,3615426,3615610,3615837,3616506,3617095,3617310,3617444,3617637,3618061,	-	GO:0004384;GO:0004385//guanylate kinase activity	-
723718	103	25	22.84	8.36	-1.44999	Down	1.05e-06	1.26e-05	jgi|Poptr1_1|723718|estExt_Genewise1_v1.C_LG_X0150|CDS chrom=LG_X strand=+ start=12251363 end=12258867 cdsStart=12251765 cdsEnd=12258552 sfCount=12 sfStarts=12251363,12251722,12253206,12253914,12254072,12254263,12254497,12257136,12257341,12257535,12257768,12258340, sfEnds=12251457,12251895,12253329,12253996,12254183,12254367,12254547,12257225,12257449,12257683,12257821,12258867,	-	-	-
593832	140	34	31.05	11.37	-1.44936	Down	1.16e-08	1.92e-07	jgi|Poptr1_1|593832|eugene3.00570076|CDS chrom=scaffold_57 strand=+ start=591404 end=594195 cdsStart=591404 cdsEnd=594195 sfCount=3 sfStarts=591404,592777,593724, sfEnds=591733,593615,594195,	-	-	-
821577	317	77	70.3	25.75	-1.44895	Down	6.64e-18	3.01e-16	jgi|Poptr1_1|821577|estExt_fgenesh4_pg.C_LG_IX1298|CDS chrom=LG_IX strand=- start=9156706 end=9162418 cdsStart=9156706 cdsEnd=9162418 sfCount=22 sfStarts=9156706,9157117,9157346,9157530,9157770,9158061,9158235,9158497,9158686,9158931,9159193,9159658,9159871,9160040,9160188,9160450,9160661,9160923,9161241,9161807,9162067,9162270, sfEnds=9156999,9157268,9157455,9157631,9157975,9158144,9158393,91586…	GO:0005875//microtubule associated complex	GO:0003777//microtubule motor activity;GO:0005524//ATP binding	GO:0007018//microtubule-based movement
766794	70	17	15.52	5.69	-1.44763	Down	6.27e-05	0.000500824	jgi|Poptr1_1|766794|fgenesh4_pg.C_LG_VIII001808|CDS chrom=LG_VIII strand=+ start=13902088 end=13909238 cdsStart=13902088 cdsEnd=13909238 sfCount=15 sfStarts=13902088,13903389,13904197,13904659,13904995,13905217,13906181,13906860,13907424,13907690,13907858,13907986,13908560,13908741,13908861, sfEnds=13902125,13903470,13904300,13904785,13905089,13905340,13906261,13906958,13907582,13907750,13907928,…	-	GO:0003824//catalytic activity	-
554844	78	19	17.3	6.35	-1.44594	Down	2.42e-05	0.000213611	jgi|Poptr1_1|554844|eugene3.00031477|CDS chrom=LG_III strand=+ start=15804500 end=15811091 cdsStart=15804500 cdsEnd=15810449 sfCount=8 sfStarts=15804500,15805882,15805983,15807202,15807646,15809399,15810078,15810601, sfEnds=15804669,15805910,15806162,15807555,15807822,15809526,15810481,15811091,	GO:0000151//ubiquitin ligase complex	GO:0008270//zinc ion binding;GO:0004842//ubiquitin-protein ligase activity	GO:0016567//protein ubiquitination
562533	230	56	51.01	18.73	-1.44543	Down	2.46e-13	7.43e-12	jgi|Poptr1_1|562533|eugene3.00070471|CDS chrom=LG_VII strand=+ start=3290184 end=3292903 cdsStart=3290184 cdsEnd=3292903 sfCount=3 sfStarts=3290184,3290481,3291770, sfEnds=3290399,3291551,3292903,	-	-	-
774032	139	34	30.83	11.37	-1.4391	Down	1.57e-08	2.52e-07	jgi|Poptr1_1|774032|fgenesh4_pg.C_LG_XIII000486|CDS chrom=LG_XIII strand=+ start=11843711 end=11847711 cdsStart=11843711 cdsEnd=11847711 sfCount=10 sfStarts=11843711,11844197,11844730,11845078,11845945,11846264,11846617,11846976,11847419,11847624, sfEnds=11843802,11844458,11844939,11845328,11846164,11846368,11846880,11847097,11847538,11847711,	-	GO:0016491//oxidoreductase activity;GO:0015036//disulfide oxidoreductase activity;GO:0005509//calcium ion binding;GO:0003954//NADH dehydrogenase activity	GO:0006118//electron transport
555118	139	34	30.83	11.37	-1.4391	Down	1.57e-08	2.52e-07	jgi|Poptr1_1|555118|eugene3.00031751|CDS chrom=LG_III strand=- start=17882463 end=17885479 cdsStart=17882463 cdsEnd=17885479 sfCount=3 sfStarts=17882463,17883157,17885120, sfEnds=17882767,17884168,17885479,	-	-	-
575012	98	24	21.73	8.03	-1.43622	Down	2.27e-06	2.52e-05	jgi|Poptr1_1|575012|eugene3.00150407|CDS chrom=LG_XV strand=- start=4057102 end=4062297 cdsStart=4057102 cdsEnd=4062297 sfCount=6 sfStarts=4057102,4058661,4059012,4060223,4061167,4061743, sfEnds=4057323,4058903,4059335,4060438,4061658,4062297,	-	-	-
657542	102	25	22.62	8.36	-1.43602	Down	1.42e-06	1.66e-05	jgi|Poptr1_1|657542|grail3.0009039502|CDS chrom=LG_VIII strand=+ start=13169509 end=13173028 cdsStart=13169705 cdsEnd=13172764 sfCount=6 sfStarts=13169509,13170442,13171590,13171781,13172303,13172591, sfEnds=13169960,13170556,13171698,13171858,13172494,13173028,	GO:0005963;GO:0017023//myosin phosphatase complex	GO:0016787//hydrolase activity;GO:0000158;GO:0004721//phosphoprotein phosphatase activity;GO:0004723//calcium-dependent protein serine/threonine phosphatase activity;GO:0004724//magnesium-dependent protein serine/threonine phosphatase activity;GO:0008420//CTD phosphatase activity;GO:0008597//calcium-dependent protein serine/threonine phosphatase regulator activity;GO:0015071;GO:0017018//myosin ph…	-
199105	1924	472	426.69	157.86	-1.43454	Down	3.09e-99	6.1e-97	jgi|Poptr1_1|199105|gw1.IV.4194.1|CDS chrom=LG_IV strand=+ start=8847438 end=8848508 cdsStart=8847438 cdsEnd=8848508 sfCount=1 sfStarts=8847438, sfEnds=8848508,	-	GO:0004014//adenosylmethionine decarboxylase activity	GO:0006597//spermine biosynthetic process;GO:0008295//spermidine biosynthetic process
825112	289	71	64.09	23.75	-1.43217	Down	3.36e-16	1.35e-14	jgi|Poptr1_1|825112|estExt_fgenesh4_pg.C_LG_XVI0424|CDS chrom=LG_XVI strand=+ start=3545383 end=3555315 cdsStart=3545383 cdsEnd=3555315 sfCount=19 sfStarts=3545383,3546567,3547259,3547749,3547985,3548441,3549164,3549462,3549819,3550288,3550530,3551531,3552124,3553310,3553750,3554041,3554234,3554710,3555151, sfEnds=3545529,3546641,3547374,3547863,3548113,3548488,3549366,3549658,3550111,3550401,355…	-	-	-
208278	65	16	14.42	5.35	-1.43046	Down	0.000136846	0.000997114	jgi|Poptr1_1|208278|gw1.V.3679.1|CDS chrom=LG_V strand=- start=3558408 end=3559626 cdsStart=3558408 cdsEnd=3559626 sfCount=3 sfStarts=3559480,3559074,3558408, sfEnds=3559626,3559279,3558954,	GO:0008287//protein serine/threonine phosphatase complex;GO:0005963;GO:0017023//myosin phosphatase complex	GO:0004722//protein serine/threonine phosphatase activity;GO:0003824//catalytic activity;GO:0000158;GO:0004721//phosphoprotein phosphatase activity;GO:0004723//calcium-dependent protein serine/threonine phosphatase activity;GO:0004724//magnesium-dependent protein serine/threonine phosphatase activity;GO:0008420//CTD phosphatase activity;GO:0008597//calcium-dependent protein serine/threonine phosp…	GO:0006470//protein amino acid dephosphorylation
562410	414	102	91.81	34.11	-1.42846	Down	1.73e-22	9.77e-21	jgi|Poptr1_1|562410|eugene3.00070348|CDS chrom=LG_VII strand=+ start=2118089 end=2121903 cdsStart=2118089 cdsEnd=2121903 sfCount=3 sfStarts=2118089,2119436,2120533, sfEnds=2118307,2120428,2121903,	-	-	-
577718	239	59	53	19.73	-1.4256	Down	1.49e-13	4.64e-12	jgi|Poptr1_1|577718|eugene3.00170460|CDS chrom=LG_XVII strand=- start=5482905 end=5489095 cdsStart=5482953 cdsEnd=5489095 sfCount=6 sfStarts=5482905,5483892,5484881,5487503,5487779,5488903, sfEnds=5483240,5484194,5485471,5487658,5487834,5489095,	-	GO:0016758//transferase activity, transferring hexosyl groups;GO:0000009//alpha-1,6-mannosyltransferase activity;GO:0000026//alpha-1,2-mannosyltransferase activity;GO:0000030//mannosyltransferase activity;GO:0000033//alpha-1,3-mannosyltransferase activity;GO:0003980//UDP-glucose:glycoprotein glucosyltransferase activity;GO:0004376//glycolipid mannosyltransferase activity;GO:0004576//oligosacchary…	GO:0016051//carbohydrate biosynthetic process
1084113	433	107	96.03	35.79	-1.42393	Down	2.35e-23	1.38e-21	jgi|Poptr1_1|1084113|estExt_Genewise1Plus.C_LG_VIII0088|CDS chrom=LG_VIII strand=- start=390968 end=394232 cdsStart=391404 cdsEnd=394232 sfCount=4 sfStarts=390968,392266,392474,393575, sfEnds=392171,392376,392850,394232,	-	-	-
819317	538	133	119.31	44.48	-1.42349	Down	1.24e-28	8.91e-27	jgi|Poptr1_1|819317|estExt_fgenesh4_pg.C_LG_VI1071|CDS chrom=LG_VI strand=- start=10412890 end=10415930 cdsStart=10413252 cdsEnd=10415930 sfCount=3 sfStarts=10412890,10413833,10414500, sfEnds=10413354,10413879,10415930,	-	-	-
424396	542	134	120.2	44.82	-1.42322	Down	7.87e-29	5.68e-27	jgi|Poptr1_1|424396|gw1.III.798.1|CDS chrom=LG_III strand=+ start=15088871 end=15096184 cdsStart=15088871 cdsEnd=15096184 sfCount=13 sfStarts=15088871,15089172,15089846,15091269,15091427,15091731,15092027,15093801,15094260,15094929,15095333,15095795,15096031, sfEnds=15089067,15089248,15090121,15091332,15091573,15091839,15092940,15094097,15094739,15095077,15095622,15095928,15096184,	-	-	-
552810	202	50	44.8	16.72	-1.42192	Down	1.27e-11	2.9e-10	jgi|Poptr1_1|552810|eugene3.00002125|CDS chrom=LG_II strand=- start=19849414 end=19855560 cdsStart=19849414 cdsEnd=19855560 sfCount=13 sfStarts=19849414,19849983,19851569,19852566,19852808,19853000,19853528,19854132,19854373,19854699,19854861,19855349,19855526, sfEnds=19849868,19850880,19851792,19852717,19852903,19853041,19853866,19854277,19854456,19854777,19854940,19855400,19855560,	-	-	-
554180	242	60	53.67	20.07	-1.41908	Down	1.26e-13	3.96e-12	jgi|Poptr1_1|554180|eugene3.00030813|CDS chrom=LG_III strand=- start=10495381 end=10501736 cdsStart=10495538 cdsEnd=10501736 sfCount=10 sfStarts=10495381,10496470,10497021,10499078,10499822,10500617,10500973,10501168,10501394,10501584, sfEnds=10495816,10496802,10497696,10499276,10499967,10500885,10501074,10501287,10501483,10501736,	-	-	-
905537	157	39	34.82	13.04	-1.41697	Down	2.76e-09	4.94e-08	jgi|Poptr1_1|905537|e_gw1.XVI.1885.1|CDS chrom=LG_XVI strand=- start=3967076 end=3969217 cdsStart=3967076 cdsEnd=3969217 sfCount=7 sfStarts=3967076,3967423,3967591,3968049,3968401,3968616,3969115, sfEnds=3967201,3967509,3967723,3968322,3968527,3968872,3969217,	-	-	-
819144	161	40	35.71	13.38	-1.41625	Down	1.73e-09	3.17e-08	jgi|Poptr1_1|819144|estExt_fgenesh4_pg.C_LG_VI0631|CDS chrom=LG_VI strand=- start=5392387 end=5405788 cdsStart=5392387 cdsEnd=5405788 sfCount=25 sfStarts=5392387,5393106,5393703,5394403,5394606,5395889,5396848,5397144,5397809,5398102,5398526,5398919,5399821,5400612,5401638,5401873,5402152,5402716,5403343,5403855,5404101,5404255,5405077,5405424,5405572, sfEnds=5393022,5393243,5394060,5394504,53946…	-	-	-
650291	161	40	35.71	13.38	-1.41625	Down	1.73e-09	3.17e-08	jgi|Poptr1_1|650291|grail3.0001118801|CDS chrom=LG_IX strand=+ start=8926447 end=8927922 cdsStart=8926453 cdsEnd=8927903 sfCount=3 sfStarts=8926447,8927133,8927544, sfEnds=8926579,8927353,8927922,	-	-	-
593886	189	47	41.91	15.72	-1.41469	Down	6.77e-11	1.46e-09	jgi|Poptr1_1|593886|eugene3.00570130|CDS chrom=scaffold_57 strand=- start=1097633 end=1101477 cdsStart=1097633 cdsEnd=1101477 sfCount=8 sfStarts=1097633,1097958,1098270,1098641,1098889,1099123,1099793,1100020, sfEnds=1097849,1098152,1098542,1098815,1098999,1099393,1099942,1101477,	-	GO:0008168//methyltransferase activity;GO:0005554	-
853026	1370	341	303.83	114.04	-1.41372	Down	1.1e-69	1.8e-67	jgi|Poptr1_1|853026|e_gw1.III.2315.1|CDS chrom=LG_III strand=- start=539882 end=549625 cdsStart=539882 cdsEnd=549625 sfCount=10 sfStarts=539882,543102,544138,544783,545335,545656,545819,547839,548119,548672, sfEnds=540175,543299,544308,544931,545482,545724,546085,548033,548235,549625,	-	-	-
757556	249	62	55.22	20.74	-1.41277	Down	6.71e-14	2.19e-12	jgi|Poptr1_1|757556|fgenesh4_pg.C_LG_III001098|CDS chrom=LG_III strand=+ start=12353531 end=12354724 cdsStart=12353531 cdsEnd=12354724 sfCount=1 sfStarts=12353531, sfEnds=12354724,	-	GO:0005509//calcium ion binding	-
208477	293	73	64.98	24.41	-1.41252	Down	4.29e-16	1.69e-14	jgi|Poptr1_1|208477|gw1.V.3878.1|CDS chrom=LG_V strand=+ start=4462116 end=4464805 cdsStart=4462116 cdsEnd=4464805 sfCount=8 sfStarts=4462116,4462260,4462612,4462824,4463122,4463864,4464006,4464644, sfEnds=4462177,4462347,4462674,4462987,4463197,4463923,4464131,4464805,	-	GO:0004672//protein kinase activity;GO:0005524//ATP binding;GO:0004713//protein tyrosine kinase activity;GO:0004674//protein serine/threonine kinase activity	GO:0006468//protein amino acid phosphorylation
728552	76	19	16.85	6.35	-1.40792	Down	4.39e-05	0.000365246	jgi|Poptr1_1|728552|estExt_Genewise1_v1.C_LG_XII0277|CDS chrom=LG_XII strand=+ start=12956955 end=12961837 cdsStart=12956955 cdsEnd=12961552 sfCount=10 sfStarts=12956955,12957213,12957713,12957894,12958250,12958502,12958647,12958794,12960044,12961014, sfEnds=12957131,12957272,12957784,12958078,12958410,12958560,12958693,12958937,12960135,12961837,	GO:0000151//ubiquitin ligase complex	GO:0004842//ubiquitin-protein ligase activity;GO:0008270//zinc ion binding;GO:0003950//NAD+ ADP-ribosyltransferase activity	GO:0016567//protein ubiquitination
816677	148	37	32.82	12.37	-1.40773	Down	9.35e-09	1.57e-07	jgi|Poptr1_1|816677|estExt_fgenesh4_pg.C_LG_II1710|CDS chrom=LG_II strand=+ start=14921078 end=14928456 cdsStart=14921078 cdsEnd=14928080 sfCount=12 sfStarts=14921078,14923741,14924371,14924552,14925333,14925771,14926472,14926937,14927340,14927507,14927980,14928122, sfEnds=14923180,14924061,14924457,14925181,14925497,14926065,14926686,14927242,14927403,14927746,14928097,14928456,	GO:0016021//integral to membrane	GO:0005524//ATP binding;GO:0042626//ATPase activity, coupled to transmembrane movement of substances;GO:0016887//ATPase activity;GO:0000166//nucleotide binding;GO:0017111//nucleoside-triphosphatase activity	GO:0006810//transport
832835	212	53	47.02	17.73	-1.40708	Down	5.67e-12	1.34e-10	jgi|Poptr1_1|832835|estExt_fgenesh4_pm.C_LG_VIII0697|CDS chrom=LG_VIII strand=- start=11128113 end=11136538 cdsStart=11128327 cdsEnd=11136538 sfCount=13 sfStarts=11128113,11129169,11130406,11130681,11131464,11132120,11132961,11133576,11133850,11134058,11134233,11135442,11136361, sfEnds=11129123,11129688,11130595,11131156,11131614,11132232,11133309,11133734,11133982,11134126,11134321,11135553,1113…	-	-	-
820446	96	24	21.29	8.03	-1.4067	Down	4.11e-06	4.38e-05	jgi|Poptr1_1|820446|estExt_fgenesh4_pg.C_LG_VIII0662|CDS chrom=LG_VIII strand=- start=4744943 end=4752947 cdsStart=4745452 cdsEnd=4752947 sfCount=15 sfStarts=4744943,4745929,4746128,4746531,4746982,4747977,4748172,4748629,4749501,4749714,4750515,4752042,4752219,4752459,4752771, sfEnds=4745725,4746055,4746227,4746602,4747029,4748066,4748262,4748736,4749589,4749818,4750687,4752132,4752324,4752583,4…	GO:0000151//ubiquitin ligase complex	GO:0004842//ubiquitin-protein ligase activity;GO:0008270//zinc ion binding	GO:0016567//protein ubiquitination
557957	366	92	81.17	30.77	-1.39942	Down	1.68e-19	8.35e-18	jgi|Poptr1_1|557957|eugene3.00091217|CDS chrom=LG_IX strand=+ start=7916871 end=7921466 cdsStart=7916871 cdsEnd=7921466 sfCount=6 sfStarts=7916871,7917302,7918593,7919783,7920298,7921095, sfEnds=7917207,7918350,7919543,7920100,7920786,7921466,	-	GO:0008570	-
821354	433	109	96.03	36.45	-1.39757	Down	9.45e-23	5.4e-21	jgi|Poptr1_1|821354|estExt_fgenesh4_pg.C_LG_IX0874|CDS chrom=LG_IX strand=- start=5777429 end=5788632 cdsStart=5777810 cdsEnd=5788632 sfCount=30 sfStarts=5777429,5778395,5778596,5779164,5779431,5779722,5780451,5781543,5781896,5782147,5782507,5782692,5782876,5783028,5783254,5783451,5783696,5783905,5784405,5784720,5785433,5785592,5785917,5786195,5786423,5787624,5787861,5788009,5788271,5788588, sfEn…	GO:0030125//clathrin vesicle coat	-	-
575509	123	31	27.28	10.37	-1.39543	Down	2.05e-07	2.78e-06	jgi|Poptr1_1|575509|eugene3.00150904|CDS chrom=LG_XV strand=+ start=8199199 end=8203129 cdsStart=8199369 cdsEnd=8202841 sfCount=9 sfStarts=8199199,8199564,8200486,8200813,8201003,8201224,8201835,8202010,8202656, sfEnds=8199476,8199677,8200707,8200887,8201119,8201474,8201910,8202096,8203129,	-	GO:0016491//oxidoreductase activity;GO:0004353//glutamate dehydrogenase [NAD(P)+] activity	GO:0006520//amino acid metabolic process
765771	337	85	74.74	28.43	-1.39447	Down	5.53e-18	2.53e-16	jgi|Poptr1_1|765771|fgenesh4_pg.C_LG_VIII000785|CDS chrom=LG_VIII strand=- start=5615250 end=5618195 cdsStart=5615250 cdsEnd=5618195 sfCount=5 sfStarts=5615250,5615610,5615787,5616019,5617919, sfEnds=5615383,5615740,5615872,5617451,5618195,	-	-	-
745217	95	24	21.07	8.03	-1.39172	Down	5.5e-06	5.67e-05	jgi|Poptr1_1|745217|estExt_Genewise1_v1.C_1450195|CDS chrom=scaffold_145 strand=+ start=791208 end=793523 cdsStart=791366 cdsEnd=793218 sfCount=4 sfStarts=791208,791941,792863,793079, sfEnds=791519,792228,792943,793523,	-	-	-
563168	83	21	18.41	7.02	-1.39095	Down	2.28e-05	0.000201917	jgi|Poptr1_1|563168|eugene3.00071106|CDS chrom=LG_VII strand=- start=10867153 end=10867398 cdsStart=10867153 cdsEnd=10867398 sfCount=1 sfStarts=10867153, sfEnds=10867398,	-	-	-
244577	87	22	19.29	7.36	-1.39008	Down	1.42e-05	0.000131057	jgi|Poptr1_1|244577|gw1.XIV.1320.1|CDS chrom=LG_XIV strand=- start=2571488 end=2572390 cdsStart=2571488 cdsEnd=2572390 sfCount=3 sfStarts=2572091,2571874,2571488, sfEnds=2572390,2572002,2571613,	-	-	-
664183	158	40	35.04	13.38	-1.38892	Down	4.14e-09	7.23e-08	jgi|Poptr1_1|664183|grail3.0035035401|CDS chrom=LG_XIV strand=- start=4010987 end=4012482 cdsStart=4010987 cdsEnd=4012426 sfCount=3 sfStarts=4010987,4011947,4012265, sfEnds=4011835,4012084,4012482,	-	-	-
1117607	296	75	65.64	25.08	-1.38804	Down	7.21e-16	2.81e-14	jgi|Poptr1_1|1117607|estExt_Genewise1Plus.C_1640105|CDS chrom=scaffold_164 strand=+ start=249603 end=252970 cdsStart=249603 cdsEnd=252822 sfCount=5 sfStarts=249603,250531,251165,251631,252014, sfEnds=249968,250666,251301,251754,252970,	-	-	-
872186	71	18	15.75	6.02	-1.38752	Down	9.51e-05	0.000723989	jgi|Poptr1_1|872186|e_gw1.VIII.1411.1|CDS chrom=LG_VIII strand=- start=4991790 end=4993885 cdsStart=4991790 cdsEnd=4993885 sfCount=2 sfStarts=4991790,4993389, sfEnds=4992663,4993885,	-	-	-
431600	118	30	26.17	10.03	-1.38359	Down	4.38e-07	5.65e-06	jgi|Poptr1_1|431600|gw1.VIII.2327.1|CDS chrom=LG_VIII strand=+ start=1667770 end=1670188 cdsStart=1667770 cdsEnd=1670188 sfCount=4 sfStarts=1667770,1668856,1669242,1669778, sfEnds=1668105,1669152,1669337,1670188,	-	-	-
851312	680	173	150.8	57.86	-1.382	Down	2.62e-34	2.31e-32	jgi|Poptr1_1|851312|e_gw1.II.1819.1|CDS chrom=LG_II strand=- start=361592 end=365497 cdsStart=361592 cdsEnd=365497 sfCount=15 sfStarts=361592,362159,362388,362541,362795,363059,363199,363373,363543,363860,364068,364375,364743,365093,365369, sfEnds=361945,362219,362455,362576,362968,363099,363248,363461,363617,363948,364125,364491,364960,365150,365497,	-	-	-
762305	114	29	25.28	9.7	-1.38194	Down	7.01e-07	8.72e-06	jgi|Poptr1_1|762305|fgenesh4_pg.C_LG_VI000615|CDS chrom=LG_VI strand=- start=5249715 end=5253857 cdsStart=5249715 cdsEnd=5253857 sfCount=6 sfStarts=5249715,5250853,5251325,5252227,5252939,5253740, sfEnds=5250397,5250976,5251461,5252362,5253267,5253857,	-	GO:0004672//protein kinase activity;GO:0005524//ATP binding;GO:0004713//protein tyrosine kinase activity;GO:0004674//protein serine/threonine kinase activity;GO:0004675//transmembrane receptor protein serine/threonine kinase activity;GO:0004676//3-phosphoinositide-dependent protein kinase activity;GO:0004677//DNA-dependent protein kinase activity;GO:0004679//AMP-activated protein kinase activity;…	GO:0006468//protein amino acid phosphorylation
1085904	365	93	80.95	31.1	-1.38012	Down	4.44e-19	2.16e-17	jgi|Poptr1_1|1085904|estExt_Genewise1Plus.C_LG_IX0087|CDS chrom=LG_IX strand=+ start=142917 end=147830 cdsStart=142942 cdsEnd=147587 sfCount=5 sfStarts=142917,143299,145339,146590,147143, sfEnds=143020,143865,146282,146777,147830,	-	-	-
832489	157	40	34.82	13.38	-1.37984	Down	5.52e-09	9.51e-08	jgi|Poptr1_1|832489|estExt_fgenesh4_pm.C_LG_VIII0107|CDS chrom=LG_VIII strand=+ start=1707722 end=1719674 cdsStart=1707722 cdsEnd=1719247 sfCount=27 sfStarts=1707722,1708305,1709685,1710030,1710594,1711022,1711765,1712033,1712541,1712918,1713182,1713581,1714010,1714240,1714904,1715653,1715952,1716296,1716814,1717366,1717796,1718039,1718362,1718603,1718842,1719023,1719160, sfEnds=1707763,1708517,1…	GO:0000145//exocyst	-	GO:0006904//vesicle docking during exocytosis;GO:0015031//protein transport
710855	102	26	22.62	8.7	-1.37851	Down	2.87e-06	3.14e-05	jgi|Poptr1_1|710855|estExt_Genewise1_v1.C_LG_II2459|CDS chrom=LG_II strand=+ start=6205561 end=6214687 cdsStart=6205901 cdsEnd=6214583 sfCount=10 sfStarts=6205561,6206704,6209768,6210612,6212333,6213216,6213457,6213671,6214091,6214416, sfEnds=6206446,6207060,6209874,6211053,6212488,6213383,6213597,6213901,6214204,6214687,	-	-	-
590056	141	36	31.27	12.04	-1.37694	Down	3.55e-08	5.3e-07	jgi|Poptr1_1|590056|eugene3.00290239|CDS chrom=scaffold_29 strand=+ start=2598822 end=2604578 cdsStart=2598822 cdsEnd=2603601 sfCount=7 sfStarts=2598822,2600792,2601491,2602327,2602603,2603551,2604550, sfEnds=2599957,2601033,2601651,2602512,2602698,2603880,2604578,	-	-	-
731607	215	55	47.68	18.39	-1.37446	Down	9.47e-12	2.21e-10	jgi|Poptr1_1|731607|estExt_Genewise1_v1.C_LG_XIV2162|CDS chrom=LG_XIV strand=+ start=4884130 end=4885664 cdsStart=4884140 cdsEnd=4885437 sfCount=4 sfStarts=4884130,4884477,4884732,4885041, sfEnds=4884371,4884577,4884940,4885664,	-	-	-
589559	2297	589	509.41	196.99	-1.3707	Down	1.68e-110	3.49e-108	jgi|Poptr1_1|589559|eugene3.00280295|CDS chrom=scaffold_28 strand=+ start=3066607 end=3071110 cdsStart=3066607 cdsEnd=3070897 sfCount=9 sfStarts=3066607,3067031,3067272,3069109,3069352,3069874,3070126,3070448,3070735, sfEnds=3066936,3067129,3067524,3069219,3069488,3069991,3070321,3070639,3071110,	-	-	-
246516	74	19	16.41	6.35	-1.36975	Down	7.9e-05	0.00061523	jgi|Poptr1_1|246516|gw1.XIV.3259.1|CDS chrom=LG_XIV strand=+ start=7750173 end=7752000 cdsStart=7750173 cdsEnd=7752000 sfCount=7 sfStarts=7750173,7750319,7750615,7750777,7751094,7751274,7751667, sfEnds=7750207,7750370,7750694,7750855,7751177,7751419,7752000,	-	-	-
666677	148	38	32.82	12.71	-1.36861	Down	1.86e-08	2.96e-07	jgi|Poptr1_1|666677|grail3.0005029001|CDS chrom=LG_XV strand=- start=7224740 end=7227173 cdsStart=7225093 cdsEnd=7227045 sfCount=1 sfStarts=7224740, sfEnds=7227173,	-	GO:0003984//acetolactate synthase activity	GO:0009082//branched chain family amino acid biosynthetic process
766958	194	50	43.02	16.72	-1.36343	Down	1.27e-10	2.65e-09	jgi|Poptr1_1|766958|fgenesh4_pg.C_LG_IX000009|CDS chrom=LG_IX strand=- start=58873 end=63212 cdsStart=58873 cdsEnd=63212 sfCount=7 sfStarts=58873,60003,60459,60978,62267,62740,63165, sfEnds=59839,60340,60863,61782,62659,63134,63212,	GO:0016020//membrane	GO:0016760//cellulose synthase (UDP-forming) activity	GO:0030244//cellulose biosynthetic process
804184	1563	403	346.63	134.78	-1.36279	Down	3.98e-75	7.06e-73	jgi|Poptr1_1|804184|fgenesh4_pm.C_LG_IX000231|CDS chrom=LG_IX strand=+ start=2852835 end=2855518 cdsStart=2852835 cdsEnd=2855518 sfCount=3 sfStarts=2852835,2853158,2855475, sfEnds=2852897,2855402,2855518,	-	GO:0004672//protein kinase activity;GO:0005524//ATP binding;GO:0004713//protein tyrosine kinase activity;GO:0004674//protein serine/threonine kinase activity	GO:0006468//protein amino acid phosphorylation
713160	399	103	88.49	34.45	-1.36101	Down	2.5e-20	1.27e-18	jgi|Poptr1_1|713160|estExt_Genewise1_v1.C_LG_IV0804|CDS chrom=LG_IV strand=- start=15130503 end=15133457 cdsStart=15130826 cdsEnd=15133018 sfCount=1 sfStarts=15130503, sfEnds=15133457,	-	GO:0003824//catalytic activity;GO:0008792//arginine decarboxylase activity	GO:0006527//arginine catabolic process;GO:0008295//spermidine biosynthetic process
552480	89	23	19.74	7.69	-1.36007	Down	1.58e-05	0.000145373	jgi|Poptr1_1|552480|eugene3.00021795|CDS chrom=LG_II strand=- start=15547772 end=15554247 cdsStart=15548079 cdsEnd=15554070 sfCount=18 sfStarts=15547772,15548518,15548667,15548797,15549492,15549758,15549921,15550071,15550350,15550850,15551002,15551152,15551946,15552167,15553193,15553709,15553934,15554202, sfEnds=15548165,15548583,15548696,15548895,15549587,15549808,15549987,15550165,15550431,1555…	GO:0045239//tricarboxylic acid cycle enzyme complex	GO:0004197//cysteine-type endopeptidase activity;GO:0003824//catalytic activity;GO:0004333//fumarate hydratase activity	GO:0006508//proteolysis;GO:0006106//fumarate metabolic process
823306	224	58	49.68	19.4	-1.35661	Down	5.57e-12	1.32e-10	jgi|Poptr1_1|823306|estExt_fgenesh4_pg.C_LG_XII0523|CDS chrom=LG_XII strand=- start=5626383 end=5631231 cdsStart=5626464 cdsEnd=5631043 sfCount=9 sfStarts=5626383,5627586,5627750,5629168,5629306,5629467,5629860,5630635,5631000, sfEnds=5627400,5627661,5627802,5629224,5629374,5629750,5630253,5630808,5631231,	-	GO:0003824//catalytic activity;GO:0016789;GO:0004620//phospholipase activity;GO:0016298//lipase activity;GO:0018731;GO:0018732;GO:0018733;GO:0018734	GO:0006629//lipid metabolic process
783315	1227	318	272.11	106.35	-1.35537	Down	7.03e-59	1.03e-56	jgi|Poptr1_1|783315|fgenesh4_pg.C_scaffold_88000008|CDS chrom=scaffold_88 strand=- start=96423 end=102279 cdsStart=96423 cdsEnd=102279 sfCount=12 sfStarts=96423,96923,97152,98359,98510,98641,98910,99125,99643,100432,100935,101992, sfEnds=96705,97050,98105,98421,98563,98817,99041,99259,100341,100495,101167,102279,	-	GO:0046524//sucrose-phosphate synthase activity	GO:0009058//biosynthetic process
768812	181	47	40.14	15.72	-1.35244	Down	6.73e-10	1.31e-08	jgi|Poptr1_1|768812|fgenesh4_pg.C_LG_X000302|CDS chrom=LG_X strand=+ start=4003075 end=4005169 cdsStart=4003075 cdsEnd=4005169 sfCount=4 sfStarts=4003075,4003793,4004401,4005042, sfEnds=4003720,4004265,4004665,4005169,	GO:0005963;GO:0017023//myosin phosphatase complex	GO:0003824//catalytic activity;GO:0000158;GO:0004721//phosphoprotein phosphatase activity;GO:0004723//calcium-dependent protein serine/threonine phosphatase activity;GO:0004724//magnesium-dependent protein serine/threonine phosphatase activity;GO:0008420//CTD phosphatase activity;GO:0008597//calcium-dependent protein serine/threonine phosphatase regulator activity;GO:0015071;GO:0017018//myosin ph…	-
643441	77	20	17.08	6.69	-1.35223	Down	6.56e-05	0.000518074	jgi|Poptr1_1|643441|grail3.0003055501|CDS chrom=LG_II strand=+ start=4342290 end=4346431 cdsStart=4342431 cdsEnd=4346391 sfCount=3 sfStarts=4342290,4345115,4346017, sfEnds=4342589,4345195,4346431,	-	-	-
266000	73	19	16.19	6.35	-1.35027	Down	0.000105625	0.000794094	jgi|Poptr1_1|266000|gw1.123.22.1|CDS chrom=scaffold_123 strand=+ start=71641 end=90079 cdsStart=71641 cdsEnd=90079 sfCount=17 sfStarts=71641,71864,73806,75805,75961,76374,77462,77648,78262,78524,78982,79757,80516,81782,84889,85983,87044, sfEnds=71721,72060,73851,75877,76018,76469,77573,77914,78363,78881,79095,80382,80712,82004,85008,86750,90079,	-	-	-
803959	119	31	26.39	10.37	-1.34758	Down	6.49e-07	8.15e-06	jgi|Poptr1_1|803959|fgenesh4_pm.C_LG_IX000006|CDS chrom=LG_IX strand=- start=77520 end=87025 cdsStart=77520 cdsEnd=87025 sfCount=12 sfStarts=77520,79304,80572,81054,81472,82262,83233,83999,84615,85287,85847,86215, sfEnds=78119,79977,80932,81375,81974,82535,83525,84421,84948,85633,86094,87025,	-	-	-
820653	134	35	29.72	11.71	-1.34369	Down	1.33e-07	1.84e-06	jgi|Poptr1_1|820653|estExt_fgenesh4_pg.C_LG_VIII1124|CDS chrom=LG_VIII strand=+ start=8204216 end=8210114 cdsStart=8204216 cdsEnd=8209869 sfCount=8 sfStarts=8204216,8205323,8206584,8207538,8207809,8208473,8208983,8209345, sfEnds=8204896,8206273,8206673,8207606,8207949,8208521,8209086,8210114,	-	GO:0003700//transcription factor activity;GO:0004725//protein tyrosine phosphatase activity;GO:0004727//prenylated protein tyrosine phosphatase activity	GO:0006355//regulation of transcription, DNA-dependent;GO:0007165//signal transduction
196216	260	68	57.66	22.74	-1.34234	Down	1.72e-13	5.32e-12	jgi|Poptr1_1|196216|gw1.IV.1305.1|CDS chrom=LG_IV strand=+ start=16131567 end=16134166 cdsStart=16131567 cdsEnd=16134166 sfCount=5 sfStarts=16131567,16133022,16133231,16133632,16133929, sfEnds=16132807,16133145,16133524,16133834,16134166,	GO:0016020//membrane	-	-
762724	168	44	37.26	14.72	-1.33985	Down	3.58e-09	6.32e-08	jgi|Poptr1_1|762724|fgenesh4_pg.C_LG_VI001034|CDS chrom=LG_VI strand=- start=9893973 end=9898991 cdsStart=9893973 cdsEnd=9898991 sfCount=11 sfStarts=9893973,9894231,9894988,9895179,9895757,9896633,9896921,9897731,9898314,9898630,9898833, sfEnds=9894090,9894481,9895087,9895376,9895962,9896845,9897059,9897979,9898519,9898725,9898991,	GO:0000145//exocyst	-	GO:0006887//exocytosis
769524	328	86	72.74	28.76	-1.33869	Down	1.38e-16	5.69e-15	jgi|Poptr1_1|769524|fgenesh4_pg.C_LG_X001014|CDS chrom=LG_X strand=- start=11374295 end=11381551 cdsStart=11374295 cdsEnd=11381551 sfCount=10 sfStarts=11374295,11374653,11374927,11375775,11376057,11377161,11379370,11379592,11380690,11381162, sfEnds=11374457,11374843,11375094,11375942,11376261,11377358,11379458,11379659,11380759,11381551,	-	-	-
554422	122	32	27.06	10.7	-1.33855	Down	5.4e-07	6.87e-06	jgi|Poptr1_1|554422|eugene3.00031055|CDS chrom=LG_III strand=- start=12417058 end=12425059 cdsStart=12417341 cdsEnd=12425059 sfCount=13 sfStarts=12417058,12418376,12419353,12420082,12420739,12420906,12422087,12422248,12422900,12423075,12423672,12424509,12424854, sfEnds=12418075,12419210,12419409,12420133,12420825,12420990,12422158,12422299,12422982,12423140,12423737,12424581,12425059,	-	-	-
808464	183	48	40.58	16.05	-1.3382	Down	7.44e-10	1.43e-08	jgi|Poptr1_1|808464|fgenesh4_pm.C_LG_XVI000192|CDS chrom=LG_XVI strand=+ start=4015842 end=4023516 cdsStart=4015842 cdsEnd=4023516 sfCount=11 sfStarts=4015842,4016527,4016980,4019106,4019380,4019843,4020987,4021213,4022473,4022849,4023236, sfEnds=4015970,4016895,4017239,4019247,4019751,4019956,4021115,4022361,4022752,4023166,4023516,	-	-	-
768258	80	21	17.74	7.02	-1.33746	Down	5.43e-05	0.000438928	jgi|Poptr1_1|768258|fgenesh4_pg.C_LG_IX001309|CDS chrom=LG_IX strand=- start=9179691 end=9187692 cdsStart=9179691 cdsEnd=9187692 sfCount=8 sfStarts=9179691,9180370,9182680,9183084,9183555,9185597,9185821,9186277, sfEnds=9180275,9180598,9182789,9183461,9183836,9185718,9185893,9187692,	GO:0016020//membrane;GO:0016021//integral to membrane	GO:0005524//ATP binding;GO:0015662//ATPase activity, coupled to transmembrane movement of ions, phosphorylative mechanism;GO:0005388//calcium-transporting ATPase activity;GO:0003824//catalytic activity;GO:0016820//hydrolase activity, acting on acid anhydrides, catalyzing transmembrane movement of substances	GO:0006812//cation transport;GO:0006816//calcium ion transport;GO:0008152//metabolic process
750839	776	204	172.09	68.23	-1.33469	Down	5.03e-37	4.85e-35	jgi|Poptr1_1|750839|fgenesh4_pg.C_LG_I000442|CDS chrom=LG_I strand=+ start=3606377 end=3611140 cdsStart=3606377 cdsEnd=3611140 sfCount=7 sfStarts=3606377,3606678,3607253,3608120,3608728,3609702,3610201, sfEnds=3606644,3606990,3607682,3608503,3609103,3610089,3611140,	GO:0016020//membrane	GO:0016760//cellulose synthase (UDP-forming) activity	GO:0030244//cellulose biosynthetic process
252991	114	30	25.28	10.03	-1.33367	Down	1.38e-06	1.62e-05	jgi|Poptr1_1|252991|gw1.XV.2427.1|CDS chrom=LG_XV strand=+ start=7877316 end=7883779 cdsStart=7877316 cdsEnd=7883779 sfCount=14 sfStarts=7877316,7877575,7878384,7878854,7879366,7879669,7879873,7880310,7880492,7881356,7882416,7882631,7882815,7883663, sfEnds=7877396,7877624,7878568,7879260,7879524,7879788,7880021,7880392,7880884,7882004,7882530,7882699,7882994,7883779,	-	GO:0003676//nucleic acid binding	-
798630	114	30	25.28	10.03	-1.33367	Down	1.38e-06	1.62e-05	jgi|Poptr1_1|798630|fgenesh4_pm.C_LG_II000319|CDS chrom=LG_II strand=- start=4681593 end=4692372 cdsStart=4681593 cdsEnd=4692372 sfCount=21 sfStarts=4681593,4682148,4682795,4683254,4683420,4683928,4684151,4684480,4685073,4685356,4686307,4687602,4687900,4688188,4688831,4689797,4690046,4690366,4691202,4691597,4691974, sfEnds=4681832,4682363,4682944,4683310,4683497,4684021,4684385,4684595,4685283,46…	-	-	-
550675	95	25	21.07	8.36	-1.33362	Down	1.09e-05	0.000103657	jgi|Poptr1_1|550675|eugene3.00013116|CDS chrom=LG_I strand=- start=35462469 end=35466854 cdsStart=35462770 cdsEnd=35466854 sfCount=4 sfStarts=35462469,35464207,35464568,35464957, sfEnds=35462825,35464261,35464757,35466854,	-	-	-
1108163	95	25	21.07	8.36	-1.33362	Down	1.09e-05	0.000103575	jgi|Poptr1_1|1108163|estExt_Genewise1Plus.C_LG_XIX1449|CDS chrom=LG_XIX strand=+ start=7209983 end=7214428 cdsStart=7209983 cdsEnd=7214052 sfCount=5 sfStarts=7209983,7211431,7211921,7213232,7213558, sfEnds=7210237,7211820,7212038,7213455,7214428,	-	-	-
801072	520	137	115.32	45.82	-1.33159	Down	3.04e-25	1.91e-23	jgi|Poptr1_1|801072|fgenesh4_pm.C_LG_V000164|CDS chrom=LG_V strand=+ start=3238943 end=3242041 cdsStart=3238943 cdsEnd=3242041 sfCount=5 sfStarts=3238943,3239407,3240074,3241316,3241615, sfEnds=3239021,3239973,3240972,3241503,3242041,	GO:0016020//membrane;GO:0016021//integral to membrane	GO:0005351//sugar:hydrogen symporter activity;GO:0005215//transporter activity;GO:0008733	GO:0008643//carbohydrate transport;GO:0006810//transport
426521	91	24	20.18	8.03	-1.32945	Down	1.74e-05	0.000157242	jgi|Poptr1_1|426521|gw1.VI.193.1|CDS chrom=LG_VI strand=- start=17337504 end=17342938 cdsStart=17337504 cdsEnd=17342938 sfCount=11 sfStarts=17342858,17341802,17341202,17340925,17340344,17339866,17339384,17338988,17338596,17337933,17337504, sfEnds=17342938,17341912,17341300,17341011,17340452,17340189,17339811,17339152,17338838,17338142,17337653,	-	-	-
788248	288	76	63.87	25.42	-1.32917	Down	1.34e-14	4.7e-13	jgi|Poptr1_1|788248|fgenesh4_pg.C_scaffold_273000008|CDS chrom=scaffold_273 strand=- start=80294 end=82343 cdsStart=80294 cdsEnd=82343 sfCount=3 sfStarts=80294,80655,81040, sfEnds=80556,80659,82343,	GO:0016021//integral to membrane	GO:0005315//inorganic phosphate transmembrane transporter activity;GO:0005215//transporter activity	GO:0006817//phosphate transport;GO:0006810//transport
592192	197	52	43.69	17.39	-1.32905	Down	2.05e-10	4.24e-09	jgi|Poptr1_1|592192|eugene3.00410035|CDS chrom=scaffold_41 strand=+ start=455696 end=465691 cdsStart=455696 cdsEnd=465691 sfCount=24 sfStarts=455696,455909,456040,456243,456543,456738,457288,458829,459101,459325,459895,460559,460909,461162,461735,461918,462227,463030,463774,464504,464713,464943,465298,465560, sfEnds=455824,455947,456128,456333,456632,456817,457380,458936,459239,459369,459950,4606…	-	-	-
714552	178	47	39.48	15.72	-1.32852	Down	1.56e-09	2.88e-08	jgi|Poptr1_1|714552|estExt_Genewise1_v1.C_LG_IV4525|CDS chrom=LG_IV strand=+ start=11512524 end=11513781 cdsStart=11512627 cdsEnd=11513780 sfCount=3 sfStarts=11512524,11513138,11513349, sfEnds=11512637,11513234,11513781,	-	-	-
822075	87	23	19.29	7.69	-1.3268	Down	2.8e-05	0.000241475	jgi|Poptr1_1|822075|estExt_fgenesh4_pg.C_LG_X0999|CDS chrom=LG_X strand=- start=11324081 end=11325530 cdsStart=11324388 cdsEnd=11324970 sfCount=2 sfStarts=11324081,11324739, sfEnds=11324557,11325530,	-	-	-
562495	155	41	34.37	13.71	-1.32592	Down	1.9e-08	3.01e-07	jgi|Poptr1_1|562495|eugene3.00070433|CDS chrom=LG_VII strand=+ start=3042158 end=3042682 cdsStart=3042158 cdsEnd=3042682 sfCount=1 sfStarts=3042158, sfEnds=3042682,	-	-	-
202910	117	31	25.95	10.37	-1.32332	Down	1.14e-06	1.36e-05	jgi|Poptr1_1|202910|gw1.IX.3375.1|CDS chrom=LG_IX strand=+ start=6843236 end=6849351 cdsStart=6843236 cdsEnd=6849351 sfCount=8 sfStarts=6843236,6843645,6843824,6844133,6845912,6847402,6848861,6849268, sfEnds=6843486,6843764,6843915,6844287,6846054,6847551,6849115,6849351,	-	GO:0016491//oxidoreductase activity;GO:0046592//polyamine oxidase activity	GO:0006118//electron transport
805001	1030	273	228.42	91.3	-1.323	Down	5.59e-48	7.41e-46	jgi|Poptr1_1|805001|fgenesh4_pm.C_LG_X000307|CDS chrom=LG_X strand=+ start=9252365 end=9255168 cdsStart=9252365 cdsEnd=9255168 sfCount=6 sfStarts=9252365,9253111,9253616,9253908,9254368,9254962, sfEnds=9252575,9253232,9253821,9254082,9254502,9255168,	-	GO:0004672//protein kinase activity;GO:0005524//ATP binding;GO:0004713//protein tyrosine kinase activity;GO:0004674//protein serine/threonine kinase activity	GO:0006468//protein amino acid phosphorylation
770239	166	44	36.81	14.72	-1.32232	Down	6.27e-09	1.07e-07	jgi|Poptr1_1|770239|fgenesh4_pg.C_LG_X001729|CDS chrom=LG_X strand=+ start=17055838 end=17061549 cdsStart=17055838 cdsEnd=17060616 sfCount=5 sfStarts=17055838,17056383,17059413,17060609,17061497, sfEnds=17056266,17056530,17059703,17060861,17061549,	-	GO:0016491//oxidoreductase activity;GO:0003845//11-beta-hydroxysteroid dehydrogenase activity	GO:0008152//metabolic process
758148	139	37	30.83	12.37	-1.31749	Down	1.22e-07	1.7e-06	jgi|Poptr1_1|758148|fgenesh4_pg.C_LG_III001690|CDS chrom=LG_III strand=- start=17374491 end=17381601 cdsStart=17374491 cdsEnd=17381601 sfCount=14 sfStarts=17374491,17374704,17375022,17375240,17375645,17375719,17375931,17377186,17377461,17378201,17378508,17379611,17380230,17381559, sfEnds=17374621,17374943,17375085,17375545,17375677,17375834,17376222,17377350,17378111,17378287,17379571,17380189,17…	GO:0016021//integral to membrane	GO:0005524//ATP binding;GO:0042626//ATPase activity, coupled to transmembrane movement of substances;GO:0016887//ATPase activity;GO:0000166//nucleotide binding;GO:0017111//nucleoside-triphosphatase activity	GO:0006810//transport
898776	75	20	16.63	6.69	-1.31371	Down	0.000116231	0.000867884	jgi|Poptr1_1|898776|e_gw1.XIV.3742.1|CDS chrom=LG_XIV strand=- start=9167339 end=9171102 cdsStart=9167339 cdsEnd=9171102 sfCount=5 sfStarts=9167339,9168099,9169961,9170421,9170878, sfEnds=9167728,9169871,9170284,9170597,9171102,	-	-	-
577041	318	85	70.52	28.43	-1.31062	Down	1.14e-15	4.3e-14	jgi|Poptr1_1|577041|eugene3.00161176|CDS chrom=LG_XVI strand=- start=11687720 end=11690549 cdsStart=11688181 cdsEnd=11690549 sfCount=4 sfStarts=11687720,11689731,11690125,11690532, sfEnds=11688413,11690040,11690400,11690549,	-	-	-
573976	572	153	126.85	51.17	-1.30975	Down	5.71e-27	3.89e-25	jgi|Poptr1_1|573976|eugene3.00190450|CDS chrom=LG_XIX strand=+ start=5712711 end=5720947 cdsStart=5712839 cdsEnd=5720715 sfCount=14 sfStarts=5712711,5713468,5714394,5715251,5715510,5715715,5715946,5716231,5717523,5718694,5719323,5719565,5720360,5720559, sfEnds=5713001,5713669,5714478,5715391,5715628,5715811,5716118,5716297,5717681,5718958,5719431,5719677,5720435,5720947,	GO:0005622//intracellular;GO:0005840//ribosome;GO:0016020//membrane	GO:0003735//structural constituent of ribosome;GO:0005279	GO:0006412//translation;GO:0006865//amino acid transport;GO:0006810//transport
715413	123	33	27.28	11.04	-1.3051	Down	7.86e-07	9.67e-06	jgi|Poptr1_1|715413|estExt_Genewise1_v1.C_LG_V1706|CDS chrom=LG_V strand=+ start=16558487 end=16566488 cdsStart=16558487 cdsEnd=16566488 sfCount=24 sfStarts=16558487,16558879,16559064,16559995,16560338,16560559,16560963,16561214,16561521,16561729,16562223,16562714,16562904,16563092,16563455,16563676,16563847,16564001,16564195,16564980,16565190,16565598,16565879,16566397, sfEnds=16558690,16558981,…	GO:0005634//nucleus	GO:0003676//nucleic acid binding;GO:0004527//exonuclease activity;GO:0004528//phosphodiesterase I activity	-
866992	674	181	149.47	60.53	-1.30413	Down	2.66e-31	2.07e-29	jgi|Poptr1_1|866992|e_gw1.VI.935.1|CDS chrom=LG_VI strand=- start=9196533 end=9201105 cdsStart=9196533 cdsEnd=9201105 sfCount=13 sfStarts=9196533,9197157,9197466,9197679,9199164,9199408,9199738,9199892,9200204,9200423,9200680,9200866,9201004, sfEnds=9196757,9197311,9197514,9197944,9199293,9199476,9199791,9200050,9200341,9200485,9200719,9200912,9201105,	-	-	-
420206	524	141	116.21	47.16	-1.3011	Down	1.33e-24	8.16e-23	jgi|Poptr1_1|420206|gw1.II.840.1|CDS chrom=LG_II strand=+ start=21609675 end=21613749 cdsStart=21609675 cdsEnd=21613749 sfCount=10 sfStarts=21609675,21609906,21610447,21611928,21612145,21612385,21612599,21612817,21613007,21613582, sfEnds=21609749,21610049,21610611,21612065,21612266,21612517,21612728,21612896,21613141,21613749,	-	-	-
823154	104	28	23.06	9.36	-1.30081	Down	6.17e-06	6.25e-05	jgi|Poptr1_1|823154|estExt_fgenesh4_pg.C_LG_XII0034|CDS chrom=LG_XII strand=- start=323208 end=336485 cdsStart=323483 cdsEnd=336485 sfCount=20 sfStarts=323208,324592,324770,324954,325143,325615,325738,328407,328710,328920,329209,332517,332925,333429,333598,333928,334083,335086,335255,336446, sfEnds=323611,324687,324882,325027,325226,325658,325881,328471,328802,329050,329264,332600,333098,333518,3…	-	GO:0004371//glycerone kinase activity	GO:0006071//glycerol metabolic process
830755	156	42	34.6	14.05	-1.3002	Down	2.76e-08	4.19e-07	jgi|Poptr1_1|830755|estExt_fgenesh4_pm.C_LG_III0245|CDS chrom=LG_III strand=- start=9365200 end=9367833 cdsStart=9365678 cdsEnd=9367670 sfCount=4 sfStarts=9365200,9366173,9366421,9367489, sfEnds=9365803,9366343,9366691,9367833,	-	-	-
175959	89	24	19.74	8.03	-1.29765	Down	3.07e-05	0.000262321	jgi|Poptr1_1|175959|gw1.I.4559.1|CDS chrom=LG_I strand=+ start=29083127 end=29088799 cdsStart=29083127 cdsEnd=29088799 sfCount=16 sfStarts=29083127,29083519,29083761,29083926,29084132,29084276,29084450,29084687,29085039,29085481,29085850,29086060,29087174,29087321,29087554,29088566, sfEnds=29083387,29083659,29083844,29084051,29084191,29084329,29084542,29084782,29085187,29085630,29085979,29087043,…	GO:0005875//microtubule associated complex	GO:0003777//microtubule motor activity;GO:0005524//ATP binding;GO:0008574//plus-end-directed microtubule motor activity	GO:0007018//microtubule-based movement
1069914	137	37	30.38	12.37	-1.29628	Down	2.13e-07	2.87e-06	jgi|Poptr1_1|1069914|estExt_Genewise1Plus.C_LG_I8079|CDS chrom=LG_I strand=- start=28752503 end=28756888 cdsStart=28752786 cdsEnd=28756798 sfCount=6 sfStarts=28752503,28753666,28754226,28755436,28755786,28756528, sfEnds=28753166,28753921,28755070,28755711,28755931,28756888,	-	-	-
226952	196	53	43.47	17.73	-1.29383	Down	5.17e-10	1.02e-08	jgi|Poptr1_1|226952|gw1.X.1649.1|CDS chrom=LG_X strand=+ start=16587202 end=16590590 cdsStart=16587202 cdsEnd=16590590 sfCount=8 sfStarts=16587202,16587872,16588205,16588603,16588963,16589304,16590019,16590407, sfEnds=16587405,16588021,16588475,16588713,16589134,16589558,16590213,16590590,	GO:0005622//intracellular;GO:0005840//ribosome	GO:0003735//structural constituent of ribosome;GO:0008168//methyltransferase activity;GO:0005554	GO:0006412//translation
762474	170	46	37.7	15.38	-1.29351	Down	7.52e-09	1.27e-07	jgi|Poptr1_1|762474|fgenesh4_pg.C_LG_VI000784|CDS chrom=LG_VI strand=+ start=6649983 end=6653873 cdsStart=6649983 cdsEnd=6653873 sfCount=14 sfStarts=6649983,6650473,6650710,6650862,6651057,6652034,6652225,6652422,6652626,6652809,6653069,6653284,6653513,6653764, sfEnds=6650376,6650635,6650758,6650975,6651869,6652129,6652340,6652524,6652726,6652974,6653176,6653412,6653591,6653873,	GO:0016020//membrane	GO:0016491//oxidoreductase activity;GO:0005509//calcium ion binding	GO:0006118//electron transport
761359	934	253	207.13	84.61	-1.29164	Down	3.72e-42	4.07e-40	jgi|Poptr1_1|761359|fgenesh4_pg.C_LG_V001411|CDS chrom=LG_V strand=+ start=15747085 end=15752561 cdsStart=15747085 cdsEnd=15752561 sfCount=13 sfStarts=15747085,15747490,15748214,15748388,15748746,15749314,15749688,15750694,15750921,15751130,15752030,15752224,15752425, sfEnds=15747308,15747664,15748297,15748629,15748968,15749393,15749772,15750825,15751034,15751177,15752114,15752280,15752561,	GO:0005952//cAMP-dependent protein kinase complex;GO:0005956//protein kinase CK2 complex	GO:0004672//protein kinase activity;GO:0005524//ATP binding;GO:0004674//protein serine/threonine kinase activity;GO:0004713//protein tyrosine kinase activity;GO:0004682//protein kinase CK2 activity;GO:0004691//cAMP-dependent protein kinase activity;GO:0008603//cAMP-dependent protein kinase regulator activity;GO:0008605//protein kinase CK2 regulator activity	GO:0006468//protein amino acid phosphorylation
828572	107	29	23.73	9.7	-1.29066	Down	5.1e-06	5.32e-05	jgi|Poptr1_1|828572|estExt_fgenesh4_pg.C_1780025|CDS chrom=scaffold_178 strand=- start=253476 end=258898 cdsStart=254030 cdsEnd=258898 sfCount=6 sfStarts=253476,256814,257116,257320,257818,258555, sfEnds=254269,256949,257243,257674,258045,258898,	GO:0016020//membrane	GO:0015450//P-P-bond-hydrolysis-driven protein transmembrane transporter activity;GO:0005524//ATP binding;GO:0016887//ATPase activity	GO:0009306//protein secretion
757162	118	32	26.17	10.7	-1.2903	Down	1.65e-06	1.91e-05	jgi|Poptr1_1|757162|fgenesh4_pg.C_LG_III000704|CDS chrom=LG_III strand=- start=8984978 end=8987191 cdsStart=8984978 cdsEnd=8987191 sfCount=4 sfStarts=8984978,8985646,8986110,8987075, sfEnds=8985530,8985851,8986304,8987191,	GO:0008287//protein serine/threonine phosphatase complex;GO:0005963;GO:0017023//myosin phosphatase complex	GO:0004722//protein serine/threonine phosphatase activity;GO:0003824//catalytic activity;GO:0000158;GO:0004721//phosphoprotein phosphatase activity;GO:0004723//calcium-dependent protein serine/threonine phosphatase activity;GO:0004724//magnesium-dependent protein serine/threonine phosphatase activity;GO:0008420//CTD phosphatase activity;GO:0008597//calcium-dependent protein serine/threonine phosp…	GO:0006470//protein amino acid dephosphorylation
569827	372	101	82.5	33.78	-1.28822	Down	1.19e-17	5.29e-16	jgi|Poptr1_1|569827|eugene3.00120480|CDS chrom=LG_XII strand=- start=5071332 end=5076303 cdsStart=5071332 cdsEnd=5076303 sfCount=18 sfStarts=5071332,5071673,5072018,5072306,5072575,5072826,5073089,5073268,5073427,5074141,5074268,5074452,5074662,5074862,5075268,5075755,5075935,5076189, sfEnds=5071519,5071926,5072135,5072501,5072681,5073005,5073184,5073349,5073768,5074170,5074360,5074529,5074745,50…	GO:0005875//microtubule associated complex	GO:0003777//microtubule motor activity;GO:0005524//ATP binding	GO:0007018//microtubule-based movement
765804	243	66	53.89	22.07	-1.28793	Down	5.18e-12	1.25e-10	jgi|Poptr1_1|765804|fgenesh4_pg.C_LG_VIII000818|CDS chrom=LG_VIII strand=- start=5799290 end=5804990 cdsStart=5799290 cdsEnd=5804990 sfCount=14 sfStarts=5799290,5799512,5799684,5799834,5800573,5800791,5801219,5801751,5802198,5802608,5802776,5803486,5803872,5804670, sfEnds=5799365,5799603,5799758,5799903,5800640,5800899,5801470,5801954,5802291,5802678,5802895,5803541,5803949,5804990,	-	-	-
829982	173	47	38.37	15.72	-1.28738	Down	6.24e-09	1.07e-07	jgi|Poptr1_1|829982|estExt_fgenesh4_pm.C_LG_II0017|CDS chrom=LG_II strand=- start=238897 end=241654 cdsStart=239302 cdsEnd=241570 sfCount=4 sfStarts=238897,239694,240149,240576, sfEnds=239544,240040,240330,241654,	GO:0016021//integral to membrane	GO:0004420//hydroxymethylglutaryl-CoA reductase (NADPH) activity	GO:0009058//biosynthetic process;GO:0006629//lipid metabolic process
770528	92	25	20.4	8.36	-1.28699	Down	2.53e-05	0.000222049	jgi|Poptr1_1|770528|fgenesh4_pg.C_LG_X002018|CDS chrom=LG_X strand=+ start=18997349 end=19003294 cdsStart=18997349 cdsEnd=19003294 sfCount=14 sfStarts=18997349,18997850,18998411,18998735,18999053,18999235,18999601,18999844,19000172,19000592,19000923,19001378,19001935,19002814, sfEnds=18997661,18997981,18998478,18998799,18999119,18999519,18999695,18999928,19000483,19000671,19001025,19001460,190025…	GO:0005950//anthranilate synthase complex	GO:0003824//catalytic activity;GO:0003676//nucleic acid binding;GO:0004522//pancreatic ribonuclease activity;GO:0005351//sugar:hydrogen symporter activity;GO:0004049//anthranilate synthase activity;GO:0016833//oxo-acid-lyase activity	GO:0009401//phosphoenolpyruvate-dependent sugar phosphotransferase system;GO:0009058//biosynthetic process;GO:0009396//folic acid and derivative biosynthetic process;GO:0008152//metabolic process
575234	103	28	22.84	9.36	-1.28698	Down	8.15e-06	8.05e-05	jgi|Poptr1_1|575234|eugene3.00150629|CDS chrom=LG_XV strand=+ start=6305997 end=6309242 cdsStart=6305997 cdsEnd=6308755 sfCount=3 sfStarts=6305997,6307871,6308113, sfEnds=6306734,6308037,6309242,	-	-	-
586324	780	212	172.98	70.9	-1.28675	Down	2.8e-35	2.52e-33	jgi|Poptr1_1|586324|eugene3.01930008|CDS chrom=scaffold_193 strand=+ start=45732 end=47057 cdsStart=45732 cdsEnd=47057 sfCount=1 sfStarts=45732, sfEnds=47057,	-	-	-
850143	287	78	63.65	26.09	-1.28666	Down	6.36e-14	2.09e-12	jgi|Poptr1_1|850143|e_gw1.II.498.1|CDS chrom=LG_II strand=- start=16759581 end=16763786 cdsStart=16759581 cdsEnd=16763786 sfCount=7 sfStarts=16759581,16761323,16761570,16761780,16761919,16762406,16763619, sfEnds=16761164,16761385,16761659,16761828,16762127,16762702,16763786,	-	-	-
1093967	1218	332	270.12	111.04	-1.28252	Down	6.66e-54	9.24e-52	jgi|Poptr1_1|1093967|estExt_Genewise1Plus.C_LG_XI2105|CDS chrom=LG_XI strand=- start=8983654 end=8989058 cdsStart=8984039 cdsEnd=8989058 sfCount=11 sfStarts=8983654,8984430,8984713,8984972,8985225,8986041,8987543,8987772,8988373,8988715,8988959, sfEnds=8984299,8984612,8984870,8985104,8985415,8986497,8987690,8987915,8988444,8988847,8989058,	-	-	-
831271	176	48	39.03	16.05	-1.28201	Down	5.17e-09	8.93e-08	jgi|Poptr1_1|831271|estExt_fgenesh4_pm.C_LG_IV0476|CDS chrom=LG_IV strand=- start=14880331 end=14887432 cdsStart=14880501 cdsEnd=14887432 sfCount=18 sfStarts=14880331,14880801,14881190,14881528,14881704,14882011,14882309,14882710,14883473,14883753,14883961,14884326,14885147,14885442,14886265,14886457,14886848,14887277, sfEnds=14880705,14880860,14881380,14881611,14881887,14882217,14882469,14882863…	GO:0016020//membrane	GO:0003936;GO:0046933//hydrogen ion transporting ATP synthase activity, rotational mechanism;GO:0046961//proton-transporting ATPase activity, rotational mechanism	GO:0015992//proton transport
792869	88	24	19.52	8.03	-1.28148	Down	4.05e-05	0.000339955	jgi|Poptr1_1|792869|fgenesh4_pg.C_scaffold_4964000002|CDS chrom=scaffold_4964 strand=+ start=1892 end=3429 cdsStart=1892 cdsEnd=3429 sfCount=2 sfStarts=1892,2849, sfEnds=2129,3429,	-	-	-
927189	557	152	123.53	50.84	-1.28083	Down	1.78e-25	1.13e-23	jgi|Poptr1_1|927189|e_gw1.130.45.1|CDS chrom=scaffold_130 strand=+ start=185900 end=188086 cdsStart=185900 cdsEnd=188086 sfCount=2 sfStarts=185900,187770, sfEnds=187079,188086,	-	-	-
833252	183	50	40.58	16.72	-1.27919	Down	2.7e-09	4.85e-08	jgi|Poptr1_1|833252|estExt_fgenesh4_pm.C_LG_IX0572|CDS chrom=LG_IX strand=- start=8071678 end=8073770 cdsStart=8071678 cdsEnd=8073770 sfCount=4 sfStarts=8071678,8072332,8072672,8073339, sfEnds=8071830,8072560,8072775,8073770,	-	-	-
798822	139	38	30.83	12.71	-1.27837	Down	2.32e-07	3.1e-06	jgi|Poptr1_1|798822|fgenesh4_pm.C_LG_II000511|CDS chrom=LG_II strand=+ start=7990890 end=7994063 cdsStart=7990890 cdsEnd=7994063 sfCount=6 sfStarts=7990890,7991433,7992067,7992723,7993163,7993449, sfEnds=7991351,7991530,7992630,7992975,7993345,7994063,	-	-	-
548326	3142	859	696.8	287.29	-1.27824	Down	1.57e-135	3.44e-133	jgi|Poptr1_1|548326|eugene3.00010767|CDS chrom=LG_I strand=+ start=6576516 end=6579155 cdsStart=6576582 cdsEnd=6578915 sfCount=2 sfStarts=6576516,6578538, sfEnds=6577955,6579155,	-	GO:0016773//phosphotransferase activity, alcohol group as acceptor	GO:0006464//protein modification process
651822	164	45	36.37	15.05	-1.27299	Down	2.06e-08	3.23e-07	jgi|Poptr1_1|651822|grail3.0002047301|CDS chrom=LG_V strand=+ start=14931727 end=14934319 cdsStart=14931727 cdsEnd=14934319 sfCount=4 sfStarts=14931727,14931985,14932435,14933144, sfEnds=14931908,14932291,14932581,14934319,	-	-	-
1110563	113	31	25.06	10.37	-1.27297	Down	3.48e-06	3.75e-05	jgi|Poptr1_1|1110563|estExt_Genewise1Plus.C_401027|CDS chrom=scaffold_40 strand=+ start=2714924 end=2720672 cdsStart=2714924 cdsEnd=2720470 sfCount=12 sfStarts=2714924,2715235,2715604,2716129,2717278,2717491,2717854,2718055,2719363,2719738,2719941,2720302, sfEnds=2715147,2715355,2716031,2716285,2717360,2717587,2717926,2718258,2719487,2719839,2720038,2720672,	-	-	-
760005	1071	294	237.52	98.33	-1.27235	Down	4.82e-47	6.24e-45	jgi|Poptr1_1|760005|fgenesh4_pg.C_LG_V000057|CDS chrom=LG_V strand=+ start=439177 end=443785 cdsStart=439177 cdsEnd=443785 sfCount=9 sfStarts=439177,439553,440385,441469,442024,442223,442707,443248,443557, sfEnds=439414,440301,440534,441739,442134,442397,442979,443442,443785,	-	GO:0008168//methyltransferase activity;GO:0005554	-
718347	455	125	100.91	41.81	-1.27115	Down	7.29e-21	3.86e-19	jgi|Poptr1_1|718347|estExt_Genewise1_v1.C_LG_VII0821|CDS chrom=LG_VII strand=+ start=1150282 end=1159335 cdsStart=1150282 cdsEnd=1158942 sfCount=19 sfStarts=1150282,1150966,1151596,1152194,1152411,1153158,1153321,1153588,1153903,1154438,1154673,1155117,1155639,1156240,1156492,1157261,1157483,1158060,1158784, sfEnds=1150416,1151040,1151711,1152308,1152539,1153205,1153496,1153784,1154195,1154587,11…	-	-	-
753770	309	85	68.53	28.43	-1.26932	Down	1.32e-14	4.65e-13	jgi|Poptr1_1|753770|fgenesh4_pg.C_LG_I003373|CDS chrom=LG_I strand=+ start=35220777 end=35221904 cdsStart=35220777 cdsEnd=35221904 sfCount=5 sfStarts=35220777,35220929,35221236,35221490,35221764, sfEnds=35220885,35221143,35221390,35221604,35221904,	-	GO:0008233//peptidase activity	GO:0006508//proteolysis
769957	80	22	17.74	7.36	-1.26923	Down	0.000104259	0.000786275	jgi|Poptr1_1|769957|fgenesh4_pg.C_LG_X001447|CDS chrom=LG_X strand=+ start=14829099 end=14834153 cdsStart=14829099 cdsEnd=14834153 sfCount=14 sfStarts=14829099,14830164,14830567,14830970,14831186,14831356,14831691,14832179,14832744,14833003,14833345,14833495,14833649,14834078, sfEnds=14829419,14830241,14830622,14831089,14831256,14831449,14831894,14832430,14832852,14833070,14833414,14833569,148337…	-	-	-
266064	618	170	137.05	56.86	-1.26922	Down	9.86e-28	6.87e-26	jgi|Poptr1_1|266064|gw1.123.86.1|CDS chrom=scaffold_123 strand=- start=245490 end=246560 cdsStart=245490 cdsEnd=246560 sfCount=1 sfStarts=245490, sfEnds=246560,	-	GO:0004014//adenosylmethionine decarboxylase activity	GO:0006597//spermine biosynthetic process;GO:0008295//spermidine biosynthetic process
421785	109	30	24.17	10.03	-1.2689	Down	5.54e-06	5.71e-05	jgi|Poptr1_1|421785|gw1.II.2419.1|CDS chrom=LG_II strand=+ start=7715092 end=7718537 cdsStart=7715092 cdsEnd=7718537 sfCount=3 sfStarts=7715092,7715758,7717771, sfEnds=7715185,7717623,7718537,	-	-	-
250697	109	30	24.17	10.03	-1.2689	Down	5.54e-06	5.71e-05	jgi|Poptr1_1|250697|gw1.XV.133.1|CDS chrom=LG_XV strand=- start=299458 end=302331 cdsStart=299458 cdsEnd=302331 sfCount=9 sfStarts=302161,301952,301181,301003,300781,300544,300264,300054,299458, sfEnds=302331,302057,301405,301079,300889,300669,300374,300161,299673,	-	GO:0005509//calcium ion binding	-
836071	109	30	24.17	10.03	-1.2689	Down	5.54e-06	5.7e-05	jgi|Poptr1_1|836071|estExt_fgenesh4_pm.C_LG_XIX0127|CDS chrom=LG_XIX strand=+ start=6049012 end=6051285 cdsStart=6049736 cdsEnd=6051076 sfCount=2 sfStarts=6049012,6049674, sfEnds=6049338,6051285,	-	-	-
716975	287	79	63.65	26.42	-1.26853	Down	1.19e-13	3.76e-12	jgi|Poptr1_1|716975|estExt_Genewise1_v1.C_LG_VI0616|CDS chrom=LG_VI strand=+ start=10945383 end=10948295 cdsStart=10945490 cdsEnd=10947836 sfCount=6 sfStarts=10945383,10946552,10947516,10948030,10948220,10948284, sfEnds=10945705,10946938,10947972,10948170,10948255,10948295,	-	-	-
725818	105	29	23.29	9.7	-1.26365	Down	8.85e-06	8.68e-05	jgi|Poptr1_1|725818|estExt_Genewise1_v1.C_LG_X4345|CDS chrom=LG_X strand=+ start=4147367 end=4154326 cdsStart=4147367 cdsEnd=4153812 sfCount=19 sfStarts=4147367,4147624,4148818,4149208,4149342,4149648,4149950,4150135,4150349,4151696,4151806,4151974,4152204,4152364,4152593,4152880,4153143,4153441,4153711, sfEnds=4147500,4147723,4149003,4149255,4149545,4149725,4150039,4150215,4150411,4151731,415189…	-	-	GO:0007049//cell cycle
828604	170	47	37.7	15.72	-1.26196	Down	1.41e-08	2.29e-07	jgi|Poptr1_1|828604|estExt_fgenesh4_pg.C_1840020|CDS chrom=scaffold_184 strand=- start=226223 end=231233 cdsStart=226543 cdsEnd=231233 sfCount=5 sfStarts=226223,226535,227727,228080,228277, sfEnds=226468,226758,227901,228184,231233,	-	-	-
717593	170	47	37.7	15.72	-1.26196	Down	1.41e-08	2.29e-07	jgi|Poptr1_1|717593|estExt_Genewise1_v1.C_LG_VI2083|CDS chrom=LG_VI strand=+ start=10660597 end=10665467 cdsStart=10660906 cdsEnd=10665463 sfCount=6 sfStarts=10660597,10661441,10663321,10663954,10664477,10664978, sfEnds=10661340,10661524,10663563,10664121,10664590,10665467,	-	GO:0005524//ATP binding;GO:0008026//ATP-dependent helicase activity;GO:0003676//nucleic acid binding;GO:0004386//helicase activity	-
824415	130	36	28.83	12.04	-1.25974	Down	7.7e-07	9.52e-06	jgi|Poptr1_1|824415|estExt_fgenesh4_pg.C_LG_XIV1163|CDS chrom=LG_XIV strand=+ start=10639925 end=10652873 cdsStart=10639925 cdsEnd=10652664 sfCount=12 sfStarts=10639925,10640760,10641312,10642460,10646322,10646479,10646759,10648540,10649845,10650114,10651242,10652524, sfEnds=10640656,10640933,10641473,10642602,10646397,10646657,10646864,10648617,10650006,10650377,10651346,10652873,	GO:0030127//COPII vesicle coat	GO:0005515//protein binding	GO:0006886//intracellular protein transport;GO:0006888//ER to Golgi vesicle-mediated transport
179430	101	28	22.4	9.36	-1.25892	Down	1.41e-05	0.000130759	jgi|Poptr1_1|179430|gw1.I.8030.1|CDS chrom=LG_I strand=- start=5064111 end=5068000 cdsStart=5064111 cdsEnd=5068000 sfCount=5 sfStarts=5067965,5066816,5065746,5064435,5064111, sfEnds=5068000,5066998,5066042,5064668,5064344,	-	GO:0046872//metal ion binding	-
1111007	234	65	51.89	21.74	-1.2551	Down	3.16e-11	7.06e-10	jgi|Poptr1_1|1111007|estExt_Genewise1Plus.C_410693|CDS chrom=scaffold_41 strand=+ start=2664052 end=2676482 cdsStart=2664052 cdsEnd=2676117 sfCount=14 sfStarts=2664052,2665489,2665994,2666849,2668352,2669256,2669460,2669877,2670661,2671780,2674244,2674589,2674856,2675166, sfEnds=2664546,2665593,2666104,2667031,2668478,2669317,2669546,2669963,2670774,2671908,2674306,2674750,2674974,2676482,	-	-	-
584709	133	37	29.5	12.37	-1.25387	Down	6.35e-07	7.98e-06	jgi|Poptr1_1|584709|eugene3.01660026|CDS chrom=scaffold_166 strand=- start=169046 end=173475 cdsStart=169046 cdsEnd=173475 sfCount=11 sfStarts=169046,170195,170500,170911,171238,171791,171992,172288,172647,172902,173162, sfEnds=169315,170428,170824,171156,171578,171871,172111,172389,172782,173060,173475,	GO:0016020//membrane	-	-
835251	122	34	27.06	11.37	-1.25093	Down	1.95e-06	2.21e-05	jgi|Poptr1_1|835251|estExt_fgenesh4_pm.C_LG_XV0342|CDS chrom=LG_XV strand=- start=8098278 end=8104578 cdsStart=8098532 cdsEnd=8104578 sfCount=16 sfStarts=8098278,8098982,8099627,8099905,8100113,8100382,8100697,8101123,8101407,8102459,8102644,8102979,8103739,8103930,8104137,8104420, sfEnds=8098717,8099359,8099821,8099982,8100301,8100612,8101047,8101320,8101577,8102566,8102853,8103185,8103843,81040…	-	GO:0003676//nucleic acid binding;GO:0004518//nuclease activity	-
578868	1012	282	224.43	94.31	-1.25078	Down	1.98e-43	2.28e-41	jgi|Poptr1_1|578868|eugene3.00181092|CDS chrom=LG_XVIII strand=- start=11961353 end=11966473 cdsStart=11961756 cdsEnd=11966357 sfCount=8 sfStarts=11961353,11962066,11962245,11963171,11963583,11963788,11964259,11966102, sfEnds=11961962,11962125,11962655,11963501,11963669,11964167,11964833,11966473,	GO:0016020//membrane	GO:0004427//inorganic diphosphatase activity;GO:0009678//hydrogen-translocating pyrophosphatase activity	GO:0015992//proton transport
[truncated: 178 more rows]

## Sheet: HPvsPT DiffGeneExpFilter.xls
Gene	RawIntensity-HP	RawIntensity-PT	TPM-HP	TPM-PT	log2 Ratio(PT/HP)	Up-Down-Regulation(PT/HP)	P-Value	FDR	Description	GO Component	GO Function	GO Process
758103	0	594	0.01	237.03	14.5328	Up	0	0	jgi|Poptr1_1|758103|fgenesh4_pg.C_LG_III001645|CDS chrom=LG_III strand=+ start=17037736 end=17039536 cdsStart=17037736 cdsEnd=17039536 sfCount=5 sfStarts=17037736,17038115,17038706,17039007,17039370, sfEnds=17037991,17038333,17038863,17039274,17039536,	-	GO:0003824//catalytic activity	-
[truncated: 1,349 more rows]
