# Supplementary material for: Digital Gene Expression Analysis of Populus simonii × P. nigra Pollen Germination and Tube Growth
Source: Front Plant Sci. 2016 Jun 15;7:825. doi: 10.3389/fpls.2016.00825 (PMC4908133; doi:10.3389/fpls.2016.00825)
Supplement: Supplementary Table S10 — Enriched pathways and DEGs in the pathways of HPvsPT. [file Table10.xls]

## Sheet: Enriched pathways of HPvsPT
Enriched pathways of HPvsPT
NO	Pathway	DEGs with pathway annotation (728)	All genes with pathway annotation (22673)	Pvalue	Qvalue	Pathway ID
1	Alzheimer's disease	28 (3.85%)	350 (1.54%)	9.95406e-06	0.00174653	ko05010
2	Sphingolipid metabolism	12 (1.65%)	85 (0.37%)	1.68746e-05	0.00174653	ko00600
3	Galactose metabolism	17 (2.34%)	173 (0.76%)	4.45889e-05	0.00250559	ko00052
4	SNARE interactions in vesicular transport	11 (1.51%)	80 (0.35%)	4.84173e-05	0.00250559	ko04130
5	Epithelial cell signaling in Helicobacter pylori infection	10 (1.37%)	75 (0.33%)	0.000137991	0.00571283	ko05120
6	Parkinson's disease	20 (2.75%)	263 (1.16%)	0.00034861	0.012027	ko05012
7	Huntington's disease	26 (3.57%)	394 (1.74%)	0.000461303	0.0136414	ko05016
8	Pathogenic Escherichia coli infection - EPEC	8 (1.1%)	63 (0.28%)	0.000885697	0.020371	ko05131
9	Pathogenic Escherichia coli infection - EHEC	8 (1.1%)	63 (0.28%)	0.000885697	0.020371	ko05130
10	Gap junction	11 (1.51%)	113 (0.5%)	0.00103523	0.0214292	ko04540
11	Phosphatidylinositol signaling system	18 (2.47%)	253 (1.12%)	0.00144493	0.0271909	ko04070
12	ErbB signaling pathway	9 (1.24%)	85 (0.37%)	0.00161404	0.0278422	ko04012
13	Inositol phosphate metabolism	14 (1.92%)	179 (0.79%)	0.00197706	0.0300869	ko00562
14	Vibrio cholerae infection	10 (1.37%)	105 (0.46%)	0.00203486	0.0300869	ko05110
15	Calcium signaling pathway	15 (2.06%)	204 (0.9%)	0.00253952	0.0320776	ko04020
16	Glycolysis / Gluconeogenesis	19 (2.61%)	290 (1.28%)	0.00276782	0.0320776	ko00010
17	Prostate cancer	12 (1.65%)	147 (0.65%)	0.00284106	0.0320776	ko05215
18	Glycerophospholipid metabolism	19 (2.61%)	292 (1.29%)	0.00298557	0.0320776	ko00564
19	Long-term potentiation	14 (1.92%)	188 (0.83%)	0.00310207	0.0320776	ko04720
20	Oxidative phosphorylation	23 (3.16%)	383 (1.69%)	0.00321348	0.0320776	ko00190
21	Melanogenesis	14 (1.92%)	189 (0.83%)	0.00325424	0.0320776	ko04916
22	Ubiquitin mediated proteolysis	25 (3.43%)	435 (1.92%)	0.00386974	0.0364108	ko04120
23	Wnt signaling pathway	15 (2.06%)	215 (0.95%)	0.0041636	0.036879	ko04310
24	Axon guidance	9 (1.24%)	98 (0.43%)	0.00427582	0.036879	ko04360
25	Pathways in cancer	18 (2.47%)	290 (1.28%)	0.0061459	0.050888	ko05200
26	TGF-beta signaling pathway	8 (1.1%)	90 (0.4%)	0.00835237	0.0664977	ko04350
27	High-mannose type N-glycan biosynthesis	2 (0.27%)	5 (0.02%)	0.00965222	0.0740004	ko00513
28	T cell receptor signaling pathway	8 (1.1%)	93 (0.41%)	0.0100996	0.0746646	ko04660
29	Tight junction	17 (2.34%)	285 (1.26%)	0.0110407	0.0788078	ko04530
30	Nucleotide sugars metabolism	7 (0.96%)	77 (0.34%)	0.0117844	0.0813124	ko00520
31	Regulation of actin cytoskeleton	15 (2.06%)	244 (1.08%)	0.0127106	0.0848739	ko04810
32	Tetracycline biosynthesis	3 (0.41%)	17 (0.07%)	0.0160185	0.100823	ko00253
33	Adherens junction	8 (1.1%)	101 (0.45%)	0.0160732	0.100823	ko04520
34	GnRH signaling pathway	12 (1.65%)	185 (0.82%)	0.016634	0.101272	ko04912
35	O-Mannosyl glycan biosynthesis	2 (0.27%)	7 (0.03%)	0.0194215	0.114864	ko00514
36	Streptomycin biosynthesis	5 (0.69%)	52 (0.23%)	0.0252727	0.14139	ko00521
37	Other glycan degradation	5 (0.69%)	52 (0.23%)	0.0252727	0.14139	ko00511
38	Biosynthesis of vancomycin group antibiotics	3 (0.41%)	22 (0.1%)	0.0322361	0.17294	ko01055
39	Glycosaminoglycan degradation	4 (0.55%)	38 (0.17%)	0.0328221	0.17294	ko00531
40	Glioma	11 (1.51%)	182 (0.8%)	0.0334184	0.17294	ko05214
41	Sulfur metabolism	5 (0.69%)	58 (0.26%)	0.0381712	0.192718	ko00920
42	mTOR signaling pathway	7 (0.96%)	103 (0.45%)	0.0481322	0.233141	ko04150
43	Starch and sucrose metabolism	30 (4.12%)	679 (2.99%)	0.0494621	0.233141	ko00500
44	Polyketide sugar unit biosynthesis	3 (0.41%)	26 (0.11%)	0.0495566	0.233141	ko00523
45	Progesterone-mediated oocyte maturation	9 (1.24%)	150 (0.66%)	0.0531515	0.244497	ko04914
46	Pentose and glucuronate interconversions	14 (1.92%)	271 (1.2%)	0.0556396	0.250378	ko00040
47	Natural killer cell mediated cytotoxicity	6 (0.82%)	86 (0.38%)	0.0583473	0.256686	ko04650
48	Carbon fixation in photosynthetic organisms	10 (1.37%)	177 (0.78%)	0.0599722	0.256686	ko00710
49	Pentose phosphate pathway	9 (1.24%)	154 (0.68%)	0.0607615	0.256686	ko00030
50	B cell receptor signaling pathway	6 (0.82%)	89 (0.39%)	0.0666821	0.270651	ko04662
51	Long-term depression	6 (0.82%)	89 (0.39%)	0.0666821	0.270651	ko04730
52	Olfactory transduction	6 (0.82%)	92 (0.41%)	0.0756748	0.301244	ko04740
53	Selenoamino acid metabolism	9 (1.24%)	163 (0.72%)	0.080321	0.313707	ko00450
54	p53 signaling pathway	10 (1.37%)	191 (0.84%)	0.0890399	0.34132	ko04115
55	Vascular smooth muscle contraction	10 (1.37%)	192 (0.85%)	0.0913922	0.343967	ko04270
56	Fatty acid biosynthesis	6 (0.82%)	100 (0.44%)	0.102825	0.374712	ko00061
57	MAPK signaling pathway	14 (1.92%)	299 (1.32%)	0.103182	0.374712	ko04010
58	Chemokine signaling pathway	6 (0.82%)	101 (0.45%)	0.106535	0.375066	ko04062
59	Fluorene degradation	4 (0.55%)	57 (0.25%)	0.110198	0.375066	ko00628
60	Cell cycle	13 (1.79%)	277 (1.22%)	0.111747	0.375066	ko04110
61	Glycosphingolipid biosynthesis - ganglio series	2 (0.27%)	18 (0.08%)	0.112338	0.375066	ko00604
62	O-Glycan biosynthesis	2 (0.27%)	18 (0.08%)	0.112338	0.375066	ko00512
63	Terpenoid biosynthesis	4 (0.55%)	58 (0.26%)	0.115534	0.37961	ko00900
64	Phenylalanine, tyrosine and tryptophan biosynthesis	7 (0.96%)	128 (0.56%)	0.118434	0.383059	ko00400
65	Basal cell carcinoma	2 (0.27%)	21 (0.09%)	0.144973	0.460918	ko05217
66	Citrate cycle (TCA cycle)	7 (0.96%)	136 (0.6%)	0.14837	0.460918	ko00020
67	Fluorobenzoate degradation	3 (0.41%)	42 (0.19%)	0.151505	0.460918	ko00364
68	Cardiac muscle contraction	3 (0.41%)	42 (0.19%)	0.151505	0.460918	ko04260
69	Insulin signaling pathway	13 (1.79%)	294 (1.3%)	0.153639	0.460918	ko04910
70	1,1,1-Trichloro-2,2-bis(4-chlorophenyl)ethane (DDT) degradation	3 (0.41%)	43 (0.19%)	0.159232	0.468496	ko00351
71	VEGF signaling pathway	6 (0.82%)	114 (0.5%)	0.160692	0.468496	ko04370
72	Endometrial cancer	5 (0.69%)	92 (0.41%)	0.173842	0.499797	ko05213
73	Biosynthesis of ansamycins	1 (0.14%)	6 (0.03%)	0.177852	0.50432	ko01051
74	Jak-STAT signaling pathway	3 (0.41%)	46 (0.2%)	0.183089	0.512154	ko04630
75	Colorectal cancer	5 (0.69%)	98 (0.43%)	0.207128	0.561422	ko05210
76	Ether lipid metabolism	4 (0.55%)	73 (0.32%)	0.207168	0.561422	ko00565
77	Glycerolipid metabolism	10 (1.37%)	231 (1.02%)	0.210311	0.561422	ko00561
78	Ribosome	25 (3.43%)	654 (2.88%)	0.211551	0.561422	ko03010
79	Biosynthesis of steroids	8 (1.1%)	179 (0.79%)	0.218655	0.572933	ko00100
80	Nicotinate and nicotinamide metabolism	3 (0.41%)	52 (0.23%)	0.233222	0.600267	ko00760
81	Metabolic pathways	183 (25.14%)	5430 (23.95%)	0.234887	0.600267	ko01100
82	Circadian rhythm - fly	2 (0.27%)	30 (0.13%)	0.250455	0.624691	ko04711
83	Non-small cell lung cancer	4 (0.55%)	80 (0.35%)	0.255466	0.624691	ko05223
84	Antigen processing and presentation	6 (0.82%)	133 (0.59%)	0.256061	0.624691	ko04612
85	Alanine and aspartate metabolism	5 (0.69%)	107 (0.47%)	0.260437	0.624691	ko00252
86	Vitamin B6 metabolism	2 (0.27%)	31 (0.14%)	0.262467	0.624691	ko00750
87	Pantothenate and CoA biosynthesis	4 (0.55%)	81 (0.36%)	0.262551	0.624691	ko00770
88	Melanoma	4 (0.55%)	82 (0.36%)	0.269674	0.627218	ko05218
89	Systemic lupus erythematosus	4 (0.55%)	82 (0.36%)	0.269674	0.627218	ko05322
90	Renal cell carcinoma	4 (0.55%)	84 (0.37%)	0.284016	0.649055	ko05211
91	Thyroid cancer	3 (0.41%)	58 (0.26%)	0.285419	0.649055	ko05216
92	Reductive carboxylate cycle (CO2 fixation)	4 (0.55%)	85 (0.37%)	0.291229	0.649055	ko00720
93	Cysteine metabolism	3 (0.41%)	59 (0.26%)	0.294228	0.649055	ko00272
94	2,4-Dichlorobenzoate degradation	5 (0.69%)	113 (0.5%)	0.297589	0.649055	ko00623
95	Amyotrophic lateral sclerosis (ALS)	6 (0.82%)	141 (0.62%)	0.300121	0.649055	ko05014
96	Valine, leucine and isoleucine biosynthesis	4 (0.55%)	87 (0.38%)	0.305726	0.649055	ko00290
97	RNA polymerase	5 (0.69%)	115 (0.51%)	0.310168	0.649055	ko03020
98	Biotin metabolism	2 (0.27%)	35 (0.15%)	0.310418	0.649055	ko00780
99	Novobiocin biosynthesis	2 (0.27%)	35 (0.15%)	0.310418	0.649055	ko00401
100	Focal adhesion	8 (1.1%)	203 (0.9%)	0.328365	0.678185	ko04510
101	1,4-Dichlorobenzene degradation	2 (0.27%)	37 (0.16%)	0.334178	0.678185	ko00627
102	MAPK signaling pathway - fly	2 (0.27%)	37 (0.16%)	0.334178	0.678185	ko04013
103	Glycosphingolipid biosynthesis - globo series	2 (0.27%)	38 (0.17%)	0.345971	0.686595	ko00603
104	Renin-angiotensin system	2 (0.27%)	38 (0.17%)	0.345971	0.686595	ko04614
105	Adipocytokine signaling pathway	5 (0.69%)	121 (0.53%)	0.348273	0.686595	ko04920
106	Proteasome	6 (0.82%)	153 (0.67%)	0.368372	0.719367	ko03050
107	Porphyrin and chlorophyll metabolism	4 (0.55%)	97 (0.43%)	0.378854	0.732923	ko00860
108	Acute myeloid leukemia	3 (0.41%)	70 (0.31%)	0.391178	0.747209	ko05221
109	Biosynthesis of unsaturated fatty acids	4 (0.55%)	99 (0.44%)	0.393458	0.747209	ko01040
110	D-Glutamine and D-glutamate metabolism	1 (0.14%)	16 (0.07%)	0.406871	0.765657	ko00471
111	Androgen and estrogen metabolism	5 (0.69%)	132 (0.58%)	0.418484	0.780416	ko00150
112	Regulation of autophagy	5 (0.69%)	133 (0.59%)	0.424828	0.785174	ko04140
113	Glutamate metabolism	5 (0.69%)	135 (0.6%)	0.437477	0.791182	ko00251
114	Chronic myeloid leukemia	3 (0.41%)	76 (0.34%)	0.442813	0.791182	ko05220
115	Nitrogen metabolism	7 (0.96%)	197 (0.87%)	0.446862	0.791182	ko00910
116	Hedgehog signaling pathway	2 (0.27%)	47 (0.21%)	0.448155	0.791182	ko04340
117	Ethylbenzene degradation	4 (0.55%)	107 (0.47%)	0.451168	0.791182	ko00642
118	MAPK signaling pathway - yeast	3 (0.41%)	78 (0.34%)	0.459653	0.791182	ko04011
119	Primary immunodeficiency	1 (0.14%)	19 (0.08%)	0.46223	0.791182	ko05340
120	Glycosphingolipid biosynthesis - lacto and neolacto series	1 (0.14%)	19 (0.08%)	0.46223	0.791182	ko00601
121	1- and 2-Methylnaphthalene degradation	7 (0.96%)	200 (0.88%)	0.462479	0.791182	ko00624
122	Notch signaling pathway	2 (0.27%)	49 (0.22%)	0.469654	0.79518	ko04330
123	Pyrimidine metabolism	11 (1.51%)	325 (1.43%)	0.472498	0.79518	ko00240
124	Synthesis and degradation of ketone bodies	1 (0.14%)	20 (0.09%)	0.479511	0.800475	ko00072
125	Alkaloid biosynthesis I	2 (0.27%)	51 (0.22%)	0.490644	0.812507	ko00950
126	Dorso-ventral axis formation	3 (0.41%)	85 (0.37%)	0.516728	0.84891	ko04320
127	Pyruvate metabolism	8 (1.1%)	245 (1.08%)	0.530934	0.865381	ko00620
128	Riboflavin metabolism	3 (0.41%)	90 (0.4%)	0.555444	0.890499	ko00740
129	Fructose and mannose metabolism	9 (1.24%)	286 (1.26%)	0.571665	0.890499	ko00051
130	Tyrosine metabolism	11 (1.51%)	350 (1.54%)	0.571675	0.890499	ko00350
131	Photosynthesis - antenna proteins	1 (0.14%)	26 (0.11%)	0.572157	0.890499	ko00196
132	Toluene and xylene degradation	1 (0.14%)	26 (0.11%)	0.572157	0.890499	ko00622
133	Type I diabetes mellitus	1 (0.14%)	26 (0.11%)	0.572157	0.890499	ko04940
134	Pancreatic cancer	3 (0.41%)	93 (0.41%)	0.577764	0.892516	ko05212
135	Nucleotide excision repair	6 (0.82%)	192 (0.85%)	0.58416	0.895712	ko03420
136	Type II diabetes mellitus	2 (0.27%)	62 (0.27%)	0.59624	0.907513	ko04930
137	Cyanoamino acid metabolism	5 (0.69%)	170 (0.75%)	0.640589	0.958521	ko00460
138	Taurine and hypotaurine metabolism	1 (0.14%)	32 (0.14%)	0.64833	0.958521	ko00430
139	Aminophosphonate metabolism	3 (0.41%)	104 (0.46%)	0.65333	0.958521	ko00440
140	Alkaloid biosynthesis II	4 (0.55%)	139 (0.61%)	0.656284	0.958521	ko00960
141	C21-Steroid hormone metabolism	1 (0.14%)	33 (0.15%)	0.659637	0.958521	ko00140
142	N-Glycan biosynthesis	2 (0.27%)	70 (0.31%)	0.662167	0.958521	ko00510
143	Fc epsilon RI signaling pathway	2 (0.27%)	70 (0.31%)	0.662167	0.958521	ko04664
144	Peptidoglycan biosynthesis	1 (0.14%)	34 (0.15%)	0.670582	0.963961	ko00550
145	Bisphenol A degradation	3 (0.41%)	108 (0.48%)	0.678285	0.964289	ko00363
146	Propanoate metabolism	5 (0.69%)	178 (0.79%)	0.680127	0.964289	ko00640
147	Methionine metabolism	7 (0.96%)	249 (1.1%)	0.691351	0.970121	ko00271
148	Aminoacyl-tRNA biosynthesis	4 (0.55%)	146 (0.64%)	0.693613	0.970121	ko00970
149	1,2-Dichloroethane degradation	1 (0.14%)	37 (0.16%)	0.701351	0.974361	ko00631
150	3-Chloroacrylic acid degradation	2 (0.27%)	77 (0.34%)	0.712504	0.983255	ko00641
151	Basal transcription factors	3 (0.41%)	118 (0.52%)	0.734777	0.999583	ko03022
152	Bladder cancer	2 (0.27%)	82 (0.36%)	0.744487	0.999583	ko05219
153	Leukocyte transendothelial migration	2 (0.27%)	83 (0.37%)	0.750505	0.999583	ko04670
154	Arginine and proline metabolism	6 (0.82%)	230 (1.01%)	0.751535	0.999583	ko00330
155	Histidine metabolism	4 (0.55%)	159 (0.7%)	0.755045	0.999583	ko00340
156	Glycosylphosphatidylinositol(GPI)-anchor biosynthesis	1 (0.14%)	44 (0.19%)	0.762443	0.999583	ko00563
157	Styrene degradation	1 (0.14%)	46 (0.2%)	0.777482	0.999583	ko00643
158	Aminosugars metabolism	3 (0.41%)	127 (0.56%)	0.778652	0.999583	ko00530
159	Glyoxylate and dicarboxylate metabolism	4 (0.55%)	167 (0.74%)	0.787861	0.999583	ko00630
160	Purine metabolism	19 (2.61%)	696 (3.07%)	0.797119	0.999583	ko00230
161	Two-component system	8 (1.1%)	316 (1.39%)	0.798979	0.999583	ko02020
162	PPAR signaling pathway	4 (0.55%)	170 (0.75%)	0.799226	0.999583	ko03320
163	Ubiquinone and menaquinone biosynthesis	1 (0.14%)	50 (0.22%)	0.804768	0.999583	ko00130
164	Tetrachloroethene degradation	2 (0.27%)	95 (0.42%)	0.813661	0.999583	ko00625
165	Drug metabolism - other enzymes	2 (0.27%)	97 (0.43%)	0.82268	0.999583	ko00983
166	Carotenoid biosynthesis	3 (0.41%)	142 (0.63%)	0.838378	0.999583	ko00906
167	Ascorbate and aldarate metabolism	3 (0.41%)	144 (0.64%)	0.845189	0.999583	ko00053
168	Circadian rhythm - plant	6 (0.82%)	262 (1.16%)	0.849546	0.999583	ko04712
169	Glycine, serine and threonine metabolism	6 (0.82%)	264 (1.16%)	0.854454	0.999583	ko00260
170	Lysine biosynthesis	1 (0.14%)	60 (0.26%)	0.859243	0.999583	ko00300
171	Homologous recombination	2 (0.27%)	108 (0.48%)	0.865607	0.999583	ko03440
172	Small cell lung cancer	3 (0.41%)	151 (0.67%)	0.8671	0.999583	ko05222
173	Flavonoid biosynthesis	7 (0.96%)	308 (1.36%)	0.868618	0.999583	ko00941
174	Folate biosynthesis	5 (0.69%)	236 (1.04%)	0.878867	0.999583	ko00790
175	Benzoate degradation via hydroxylation	1 (0.14%)	68 (0.3%)	0.891668	0.999583	ko00362
176	Protein export	1 (0.14%)	71 (0.31%)	0.901801	0.999583	ko03060
177	Bacterial secretion system	1 (0.14%)	71 (0.31%)	0.901801	0.999583	ko03070
178	Benzoate degradation via CoA ligation	4 (0.55%)	219 (0.97%)	0.924179	0.999583	ko00632
179	Lysine degradation	3 (0.41%)	180 (0.79%)	0.931337	0.999583	ko00310
180	Heparan sulfate biosynthesis	1 (0.14%)	86 (0.38%)	0.939916	0.999583	ko00534
181	Phenylalanine metabolism	7 (0.96%)	360 (1.59%)	0.945813	0.999583	ko00360
182	Naphthalene and anthracene degradation	10 (1.37%)	490 (2.16%)	0.954947	0.999583	ko00626
183	gamma-Hexachlorocyclohexane degradation	10 (1.37%)	500 (2.21%)	0.961761	0.999583	ko00361
184	Glucosinolate biosynthesis	1 (0.14%)	106 (0.47%)	0.968806	0.999583	ko00966
185	Cell cycle - yeast	7 (0.96%)	392 (1.73%)	0.970121	0.999583	ko04111
186	Base excision repair	2 (0.27%)	166 (0.73%)	0.971515	0.999583	ko03410
187	Mismatch repair	1 (0.14%)	111 (0.49%)	0.973523	0.999583	ko03430
188	Arachidonic acid metabolism	1 (0.14%)	111 (0.49%)	0.973523	0.999583	ko00590
189	Methane metabolism	3 (0.41%)	223 (0.98%)	0.975867	0.999583	ko00680
190	Butanoate metabolism	3 (0.41%)	223 (0.98%)	0.975867	0.999583	ko00650
191	DNA replication	2 (0.27%)	174 (0.77%)	0.977203	0.999583	ko03030
192	Retinol metabolism	2 (0.27%)	175 (0.77%)	0.977832	0.999583	ko00830
193	Fatty acid metabolism	3 (0.41%)	229 (1.01%)	0.979249	0.999583	ko00071
194	Linoleic acid metabolism	1 (0.14%)	133 (0.59%)	0.987137	0.999583	ko00591
195	Urea cycle and metabolism of amino groups	1 (0.14%)	133 (0.59%)	0.987137	0.999583	ko00220
196	Diterpenoid biosynthesis	1 (0.14%)	141 (0.62%)	0.990109	0.999583	ko00904
197	alpha-Linolenic acid metabolism	1 (0.14%)	142 (0.63%)	0.990428	0.999583	ko00592
198	Glutathione metabolism	2 (0.27%)	218 (0.96%)	0.993478	0.999583	ko00480
199	Limonene and pinene degradation	9 (1.24%)	563 (2.48%)	0.994345	0.999583	ko00903
200	Valine, leucine and isoleucine degradation	1 (0.14%)	162 (0.71%)	0.995039	0.999583	ko00280
201	Phenylpropanoid biosynthesis	14 (1.92%)	803 (3.54%)	0.996607	0.999583	ko00940
202	Apoptosis	9 (1.24%)	625 (2.76%)	0.998418	0.999583	ko04210
203	Toll-like receptor signaling pathway	8 (1.1%)	588 (2.59%)	0.998704	0.999583	ko04620
204	Metabolism of xenobiotics by cytochrome P450	1 (0.14%)	211 (0.93%)	0.999011	0.999583	ko00980
205	Photosynthesis	1 (0.14%)	212 (0.94%)	0.999043	0.999583	ko00195
206	Drug metabolism - cytochrome P450	1 (0.14%)	217 (0.96%)	0.999188	0.999583	ko00982
207	Tryptophan metabolism	2 (0.27%)	311 (1.37%)	0.999583	0.999583	ko00380

## Sheet: DEGs in enriched pathways
DEGs in enriched pathways of HPvsPT
NO	Pathway	Differentially expressed genes
1	Alzheimer's disease	564376, 735966, 718188, 712114, 576061, 648114, 717167, 666293, 657050, 831609, 663875, 709824, 739853, 676209, 835941, 829205, 575307, 831095, 832510, 822103, 659822, 427239, 830672, 834294, 706905, 821843, 821834, 714709
2	Sphingolipid metabolism	577822, 752844, 228333, 819196, 576416, 419717, 767279, 810188, 797095, 816189, 831564, 837466
3	Galactose metabolism	577822, 818966, 228333, 831195, 280952, 591575, 820551, 767279, 799942, 810188, 797095, 592259, 817289, 667914, 832763, 219726, 256514
4	SNARE interactions in vesicular transport	833352, 219297, 825249, 826623, 738036, 256329, 641007, 226184, 554868, 255152, 836058
5	Epithelial cell signaling in Helicobacter pylori infection	818691, 725234, 831271, 801528, 576748, 836924, 726954, 433477, 821076, 719941
6	Parkinson's disease	822202, 830977, 712114, 832690, 657050, 570383, 659697, 831609, 430743, 755366, 709824, 829205, 832510, 822103, 659822, 830672, 580465, 834294, 821834, 714709
7	Huntington's disease	817160, 719511, 830977, 549817, 713972, 712114, 657050, 433541, 779124, 570383, 831609, 707797, 755366, 709824, 829205, 832510, 246517, 822103, 424327, 659822, 595511, 830672, 580465, 834294, 821834, 714709
8	Pathogenic Escherichia coli infection - EPEC	822012, 831273, 736276, 707456, 708103, 200584, 569745, 588050
9	Pathogenic Escherichia coli infection - EHEC	822012, 831273, 736276, 707456, 708103, 200584, 569745, 588050
10	Gap junction	560079, 735966, 718188, 736276, 707456, 708103, 773811, 569745, 208477, 648419, 588050
11	Phosphatidylinositol signaling system	560079, 564376, 572339, 281696, 556445, 736729, 744645, 576061, 648114, 717167, 668308, 666293, 773811, 568956, 259295, 676209, 178459, 801743
12	ErbB signaling pathway	831273, 560079, 735966, 718188, 577198, 200584, 773811, 663875, 831095
13	Inositol phosphate metabolism	649253, 745185, 713245, 572339, 281696, 724697, 556445, 736729, 668308, 568956, 259295, 832275, 178459, 801743
14	Vibrio cholerae infection	560079, 818691, 725234, 831271, 728284, 773811, 801528, 246517, 821076, 719941
15	Calcium signaling pathway	560079, 564376, 830977, 576061, 648114, 787659, 717167, 666293, 773811, 570383, 755366, 739853, 676209, 835941, 580465
16	Glycolysis / Gluconeogenesis	232962, 724697, 253535, 280952, 659332, 564181, 822107, 737709, 836259, 755473, 575307, 575698, 706905, 832763, 823258, 219726, 821843, 739764, 829515
17	Prostate cancer	735966, 718188, 592912, 433541, 259295, 818818, 663875, 831095, 648419, 424327, 216150, 550613
18	Glycerophospholipid metabolism	593768, 765650, 564577, 570778, 820673, 596420, 728460, 658758, 744645, 419717, 665408, 424123, 767991, 255093, 255086, 676110, 737117, 432271, 829577
19	Long-term potentiation	560079, 564376, 735966, 718188, 576061, 648114, 717167, 666293, 433541, 773811, 739853, 676209, 835941, 424327
20	Oxidative phosphorylation	818691, 712114, 831195, 751961, 725234, 831271, 578868, 657050, 801678, 801528, 831609, 709824, 832510, 822103, 821076, 659822, 830672, 755787, 834294, 762873, 719941, 821834, 714709
21	Melanogenesis	560079, 564376, 735966, 718188, 576061, 648114, 717167, 666293, 433541, 773811, 663875, 676209, 831095, 424327
22	Ubiquitin mediated proteolysis	820061, 753194, 560079, 208407, 822202, 822983, 710125, 554844, 818405, 578661, 728460, 556865, 829607, 577702, 563056, 658758, 832690, 785805, 763000, 659697, 828132, 649204, 430743, 554851, 565361
23	Wnt signaling pathway	560079, 208891, 711398, 819327, 433541, 773811, 649204, 663875, 739853, 835941, 835526, 831095, 424327, 833487, 577280
24	Axon guidance	735966, 718188, 799937, 640513, 200584, 663875, 739853, 835941, 831095
25	Pathways in cancer	560079, 735966, 718188, 553737, 200584, 592912, 433541, 773811, 423542, 259295, 818818, 663875, 829205, 831095, 648419, 424327, 216150, 550613
26	TGF-beta signaling pathway	735966, 718188, 819327, 577198, 433541, 649204, 424327, 833487
27	High-mannose type N-glycan biosynthesis	554180, 655661
28	T cell receptor signaling pathway	831273, 735966, 718188, 663875, 739853, 835941, 831095, 577280
29	Tight junction	560079, 817160, 242477, 226940, 208891, 563816, 560092, 553737, 819327, 200584, 773811, 834106, 259295, 832002, 833487, 577280, 553932
30	Nucleotide sugars metabolism	835719, 818966, 831195, 649062, 591575, 572692, 706198
31	Regulation of actin cytoskeleton	822012, 735966, 718188, 572339, 799937, 819056, 640513, 653969, 668776, 576748, 836924, 726954, 433477, 216150, 178459
32	Tetracycline biosynthesis	831870, 560869, 556403
33	Adherens junction	822012, 735966, 718188, 208891, 433541, 424327, 216150, 577280
34	GnRH signaling pathway	593768, 564376, 735966, 718188, 576061, 648114, 717167, 666293, 554393, 208477, 676209, 829577
35	O-Mannosyl glycan biosynthesis (no map in kegg database)	819624, 835832
36	Streptomycin biosynthesis	649062, 832275, 572692, 706198, 832763
37	Other glycan degradation (no map in kegg database)	577822, 767279, 810188, 797095, 816898
38	Biosynthesis of vancomycin group antibiotics	649062, 572692, 706198
39	Glycosaminoglycan degradation	805321, 767279, 810188, 554653
40	Glioma	560079, 564376, 735966, 718188, 576061, 648114, 717167, 666293, 773811, 259295, 676209
41	Sulfur metabolism	833121, 835709, 568956, 729987, 818792
42	mTOR signaling pathway	735966, 718188, 246905, 422476, 577198, 660765, 566160
43	Starch and sucrose metabolism	551510, 571449, 202856, 754371, 800515, 802880, 761599, 835719, 568670, 548466, 565568, 570537, 832848, 577968, 575736, 548402, 733960, 832548, 591575, 751663, 799942, 720067, 589559, 592259, 817289, 826149, 783315, 800623, 832763, 256514
44	Polyketide sugar unit biosynthesis	649062, 572692, 706198
45	Progesterone-mediated oocyte maturation	720923, 173354, 735966, 818998, 718188, 820971, 592912, 648419, 550613
46	Pentose and glucuronate interconversions	750465, 202856, 207102, 802880, 758314, 835719, 565568, 577968, 777442, 591575, 751663, 665706, 581348, 800623
47	Natural killer cell mediated cytotoxicity	560079, 735966, 718188, 773811, 739853, 835941
48	Carbon fixation in photosynthetic organisms	724697, 820117, 659332, 835881, 552034, 564181, 822107, 707785, 835828, 711993
49	Pentose phosphate pathway	666749, 834366, 280952, 552034, 822107, 561452, 708767, 832763, 219726
50	B cell receptor signaling pathway	735966, 718188, 663875, 739853, 835941, 831095
51	Long-term depression	560079, 735966, 718188, 819327, 773811, 833487
52	Olfactory transduction	564376, 576061, 648114, 717167, 666293, 676209
53	Selenoamino acid metabolism	258099, 174417, 833121, 420914, 835709, 707148, 597072, 729987, 818792
54	p53 signaling pathway	761175, 173354, 818998, 820971, 829607, 259295, 829205, 648419, 565361, 835084
55	Vascular smooth muscle contraction	560079, 564376, 735966, 718188, 576061, 648114, 717167, 666293, 773811, 676209
56	Fatty acid biosynthesis	831870, 739215, 560869, 665443, 556403, 582749
57	MAPK signaling pathway	560079, 735966, 718188, 200584, 815726, 773811, 554393, 563887, 208477, 822482, 739853, 835941, 216150, 577280
58	Chemokine signaling pathway	822012, 834582, 735966, 718188, 663875, 831095
59	Fluorene degradation	201272, 573569, 830063, 763444
60	Cell cycle	720923, 173354, 818998, 226940, 820971, 200584, 433541, 649204, 663875, 831095, 648419, 424327, 672511
61	Glycosphingolipid biosynthesis - ganglio series	767279, 810188
62	O-Glycan biosynthesis	572035, 570194
63	Terpenoid biosynthesis	422674, 832433, 818128, 560081
64	Phenylalanine, tyrosine and tryptophan biosynthesis	835881, 576748, 836924, 773968, 835828, 726954, 433477
65	Basal cell carcinoma	663875, 831095
66	Citrate cycle (TCA cycle)	820117, 707785, 755473, 656642, 246575, 829515, 825258
67	Fluorobenzoate degradation	201272, 830063, 824346
68	Cardiac muscle contraction	712114, 830672, 714709
69	Insulin signaling pathway	564376, 735966, 718188, 576061, 648114, 577198, 717167, 666293, 663875, 676209, 831095, 660765, 566160
70	1,1,1-Trichloro-2,2-bis(4-chlorophenyl)ethane (DDT) degradation	201272, 573569, 830063
71	VEGF signaling pathway	560079, 735966, 718188, 773811, 739853, 835941
72	Endometrial cancer	735966, 718188, 259295, 663875, 831095
73	Biosynthesis of ansamycins	552034
74	Jak-STAT signaling pathway	433541, 246517, 424327
75	Colorectal cancer	735966, 718188, 663875, 829205, 831095
76	Ether lipid metabolism	593768, 419717, 767991, 829577
77	Glycerolipid metabolism	553922, 765387, 722193, 428298, 228333, 744645, 419717, 767991, 552087, 578871
78	Ribosome	427260, 663639, 727272, 230092, 816561, 813651, 569228, 575241, 725361, 824872, 240413, 819897, 656057, 235464, 837007, 835446, 818704, 663801, 641311, 556400, 828502, 561203, 835439, 813786, 728108
79	Biosynthesis of steroids	260712, 422674, 832433, 818128, 206835, 432271, 560081, 549568
80	Nicotinate and nicotinamide metabolism	669517, 836891, 818430
81	Metabolic pathways (no map in kegg database)	666749, 804204, 202856, 553922, 731787, 780310, 593768, 577822, 802880, 817160, 765387, 232962, 575404, 564577, 572035, 761599, 722193, 765536, 669517, 805321, 709180, 835719, 713972, 765701, 832217, 260712, 231066, 422674, 720244, 428298, 808299, 572339, 736828, 818966, 550478, 740496, 836891, 724697, 820673, 565568, 556445, 561843, 818691, 832587, 728460, 570537, 650525, 832848, 834366, 712114,…
82	Circadian rhythm - fly	663875, 831095
83	Non-small cell lung cancer	560079, 735966, 718188, 773811
84	Antigen processing and presentation	817294, 592912, 815726, 563887, 822482, 550613
85	Alanine and aspartate metabolism	740496, 829702, 835881, 745198, 835828
86	Vitamin B6 metabolism	576973, 560912
87	Pantothenate and CoA biosynthesis	824671, 737709, 570098, 721249
88	Melanoma	735966, 718188, 259295, 216150
89	Systemic lupus erythematosus	203847, 198384, 650690, 668302
90	Renal cell carcinoma	735966, 718188, 433541, 424327
91	Thyroid cancer	735966, 718188, 553737
92	Reductive carboxylate cycle (CO2 fixation)	820117, 707785, 656642, 246575
93	Cysteine metabolism	835709, 835881, 835828
94	2,4-Dichlorobenzoate degradation	758103, 722193, 570778, 573569, 716668
95	Amyotrophic lateral sclerosis (ALS)	727410, 739853, 835941, 829205, 730689, 595511
96	Valine, leucine and isoleucine biosynthesis	820138, 756117, 737709, 755473
97	RNA polymerase	817160, 713972, 779124, 707797, 246517
98	Biotin metabolism	765536, 736828
99	Novobiocin biosynthesis	835881, 835828
100	Focal adhesion	560079, 735966, 718188, 773811, 259295, 663875, 831095, 427239
101	1,4-Dichlorobenzene degradation	763444, 824346
102	MAPK signaling pathway - fly (no map in kegg database)	735966, 718188
103	Glycosphingolipid biosynthesis - globo series	808299, 228333
104	Renin-angiotensin system	551354, 832488
105	Adipocytokine signaling pathway	709180, 821633, 209891, 660765, 566160
106	Proteasome	815024, 561786, 255093, 255086, 836439, 739967
107	Porphyrin and chlorophyll metabolism	575404, 551443, 172219, 755787
108	Acute myeloid leukemia	735966, 718188, 577198
109	Biosynthesis of unsaturated fatty acids (no map in kegg database)	764671, 665443, 561258, 582749
110	D-Glutamine and D-glutamate metabolism	571209
111	Androgen and estrogen metabolism	258099, 174417, 420914, 763444, 759753
112	Regulation of autophagy	766161, 719853, 817262, 660765, 566160
113	Glutamate metabolism	249106, 571209, 835881, 819912, 835828
114	Chronic myeloid leukemia	735966, 718188, 200584
115	Nitrogen metabolism	837131, 597587, 740496, 256588, 571209, 829702, 819912
116	Hedgehog signaling pathway	663875, 831095
117	Ethylbenzene degradation	665408, 255093, 255086, 737117
118	MAPK signaling pathway - yeast	560079, 553737, 773811
119	Primary immunodeficiency	226456
120	Glycosphingolipid biosynthesis - lacto and neolacto series	808299
121	1- and 2-Methylnaphthalene degradation	232962, 573569, 665408, 763444, 255093, 255086, 737117
122	Notch signaling pathway	433541, 424327
123	Pyrimidine metabolism	817160, 669517, 713972, 736622, 836891, 779124, 428160, 707797, 765739, 246517, 740227
124	Synthesis and degradation of ketone bodies	646543
125	Alkaloid biosynthesis I	835881, 835828
126	Dorso-ventral axis formation	735966, 718188, 833248
127	Pyruvate metabolism	831870, 820117, 560869, 707785, 755473, 711993, 556403, 829515
128	Riboflavin metabolism	433973, 427260, 231595
129	Fructose and mannose metabolism	724697, 570537, 575736, 280952, 206835, 835143, 822107, 656143, 219726
130	Tyrosine metabolism	258099, 174417, 232962, 420914, 665408, 763444, 835881, 255093, 255086, 835828, 737117
131	Photosynthesis - antenna proteins	832587
132	Toluene and xylene degradation	763444
133	Type I diabetes mellitus	816956
134	Pancreatic cancer	735966, 718188, 423542
135	Nucleotide excision repair	753194, 804101, 784346, 800263, 829607, 583163
136	Type II diabetes mellitus	735966, 718188
137	Cyanoamino acid metabolism	571449, 800515, 740496, 767975, 826149
138	Taurine and hypotaurine metabolism	780310
139	Aminophosphonate metabolism	258099, 174417, 420914
140	Alkaloid biosynthesis II	758103, 722193, 570778, 833658
141	C21-Steroid hormone metabolism	561452
142	N-Glycan biosynthesis	554180, 655661
143	Fc epsilon RI signaling pathway	735966, 718188
144	Peptidoglycan biosynthesis	819912
145	Bisphenol A degradation	573569, 763444, 206835
146	Propanoate metabolism	201272, 830063, 831870, 560869, 556403
147	Methionine metabolism	231066, 720244, 835709, 559288, 707148, 597072, 199105
148	Aminoacyl-tRNA biosynthesis	552617, 820138, 756117, 745198
149	1,2-Dichloroethane degradation	829515
150	3-Chloroacrylic acid degradation	232962, 829515
151	Basal transcription factors	736035, 835078, 651822
152	Bladder cancer	735966, 718188
153	Leukocyte transendothelial migration	560079, 773811
154	Arginine and proline metabolism	571209, 835881, 819912, 835828, 556403, 199105
155	Histidine metabolism	258099, 174417, 420914, 763444
156	Glycosylphosphatidylinositol(GPI)-anchor biosynthesis	832217
157	Styrene degradation	573569
158	Aminosugars metabolism	548402, 249106, 246378
159	Glyoxylate and dicarboxylate metabolism	834434, 820117, 707785, 246575
160	Purine metabolism	830429, 817160, 833121, 669517, 713972, 765701, 836891, 824692, 836228, 578523, 779124, 707797, 580581, 765739, 246517, 566361, 729987, 720292, 818792
161	Two-component system	576748, 836924, 819912, 773968, 726954, 433477, 711993, 261123
162	PPAR signaling pathway	709180, 209891, 815396, 794626
163	Ubiquinone and menaquinone biosynthesis	420914
164	Tetrachloroethene degradation	731787, 206835
165	Drug metabolism - other enzymes	258099, 765701
166	Carotenoid biosynthesis	666749, 834366, 561452
167	Ascorbate and aldarate metabolism	835719, 745185, 798682
168	Circadian rhythm - plant	804204, 294641, 208891, 561843, 562313, 569412
169	Glycine, serine and threonine metabolism	820673, 728460, 658758, 206835, 424123, 288174
170	Lysine biosynthesis	288174
171	Homologous recombination	286483, 583163
172	Small cell lung cancer	259295, 829205, 648419
173	Flavonoid biosynthesis	804204, 550478, 561843, 831195, 829835, 797845, 766062
174	Folate biosynthesis	428754, 226137, 824692, 553430, 836228
175	Benzoate degradation via hydroxylation	573569
176	Protein export	262651
177	Bacterial secretion system	262651
178	Benzoate degradation via CoA ligation	665408, 255093, 255086, 737117
179	Lysine degradation	765536, 736828, 801345
180	Heparan sulfate biosynthesis	650525
181	Phenylalanine metabolism	665408, 763444, 835881, 255093, 255086, 835828, 737117
182	Naphthalene and anthracene degradation	258099, 174417, 420914, 573569, 763444, 716668, 558572, 565131, 424327, 829515
183	gamma-Hexachlorocyclohexane degradation	433973, 427260, 763444, 716668, 558572, 565131, 231595, 824346, 424327, 829515
184	Glucosinolate biosynthesis (no map in kegg database)	811849
185	Cell cycle - yeast	720923, 761175, 226940, 556865, 649204, 554851, 561890
186	Base excision repair	817401, 226456
187	Mismatch repair	583163
188	Arachidonic acid metabolism	731787
189	Methane metabolism	232962, 763444, 652670
190	Butanoate metabolism	206835, 755473, 646543
191	DNA replication	564778, 583163
192	Retinol metabolism	232962, 727523
193	Fatty acid metabolism	232962, 709180, 209891
194	Linoleic acid metabolism	206835
195	Urea cycle and metabolism of amino groups	199105
196	Diterpenoid biosynthesis	550478
197	alpha-Linolenic acid metabolism	810138
198	Glutathione metabolism	798682, 708767
199	Limonene and pinene degradation	665408, 763444, 716668, 558572, 565131, 255093, 255086, 737117, 424327
200	Valine, leucine and isoleucine degradation	646543
201	Phenylpropanoid biosynthesis	571449, 800515, 244470, 829835, 811849, 716668, 797845, 558572, 646335, 766062, 565131, 826149, 424327, 667694
202	Apoptosis	774411, 801905, 570981, 260154, 433599, 739853, 835941, 829205, 427239
203	Toll-like receptor signaling pathway	735966, 774411, 801905, 718188, 570981, 260154, 433599, 577280
204	Metabolism of xenobiotics by cytochrome P450	232962
205	Photosynthesis	663556
206	Drug metabolism - cytochrome P450	232962
207	Tryptophan metabolism	811849, 785006
